# Supplementary material for: Racial, Ethnic, and Socioeconomic Inequities in Glucagon-Like Peptide-1 Receptor Agonist Use Among Patients With Diabetes in the US
Source: PubMed Central journal article supplement (PMC8796881; doi:10.1001/jamahealthforum.2021.4182), 2021-12-17
Supplement: jamahealthforum-e214182-s001.pdf [file jamahealthforum-e214182-s001.pdf]

## Supplemental Online Content

Eberly LA, Yang L, Essien UR, et al. Racial, ethnic, and socioeconomic inequities in glucagon-like peptide-1 receptor agonist use among patients with diabetes in the US. *JAMA Health Forum*. 2021;2(12):e214182. doi:10.1001/jamahealthforum.2021.4182

**eTable.** Included ICD codes for Atherosclerotic Cardiovascular Disease

This supplemental material has been provided by the authors to give readers additional information about their work.

**eTable. Included ICD codes for Atherosclerotic Cardiovascular Disease**

| Name                                                                                                         | ICD-9-CM       | ICD-10-CM               |
|--------------------------------------------------------------------------------------------------------------|----------------|-------------------------|
| Type 2 diabetes mellitus with atherosclerosis of aorta                                                       | 250.70, 440.0  | E11.51, I70.0           |
| Diabetes mellitus with atherosclerosis of arteries of extremities                                            | 250.70, 440.20 | E11.51, I70.209         |
| Diabetes type 2 with atherosclerosis of arteries of extremities                                              | 250.70, 440.20 | E11.51, I70.209         |
| Diabetes type II with atherosclerosis of arteries of extremities                                             | 250.70, 440.20 | E11.51, I70.209         |
| Type 2 diabetes with atherosclerosis of arteries of extremities                                              | 250.70, 440.20 | E11.51, I70.209         |
| Diabetes mellitus type 2 with atherosclerosis of arteries of extremities                                     | 250.70, 440.20 | E11.51, I70.209         |
| Uncontrolled diabetes with atherosclerosis of extremity arteries                                             | 250.72, 440.20 | E11.51, I70.209, E11.65 |
| Uncontrolled diabetes type 2 with extremity artery atherosclerosis                                           | 250.72, 440.20 | E11.51, I70.209, E11.65 |
| Uncontrolled diabetes type II with extremity artery atherosclerosis                                          | 250.72, 440.20 | E11.51, I70.209, E11.65 |
| Uncontrolled type 2 diabetes with extremity artery atherosclerosis                                           | 250.72, 440.20 | E11.51, I70.209, E11.65 |
| Uncontrolled diabetes mellitus with atherosclerosis of arteries of extremities                               | 250.72, 440.20 | E11.51, I70.209, E11.65 |
| Uncontrolled diabetes mellitus type 2 with atherosclerosis of arteries of extremities                        | 250.72, 440.20 | E11.51, I70.209, E11.65 |
| Type 2 diabetes mellitus with atherosclerosis of native arteries of extremity with intermittent claudication | 250.70, 440.21 | E11.51, I70.219         |
| Type 2 diabetes mellitus with atherosclerosis of native arteries of extremity with rest pain                 | 250.70, 440.22 | E11.51, I70.229         |
| Angina pectoris associated with type 2 diabetes mellitus                                                     | 250.80, 413.9  | E11.59, I20.9           |
| DM type 2 with diabetic angina pectoris                                                                      | 250.80, 413.9  | E11.59, I20.9           |

|                                                                        |                     |                 |
|------------------------------------------------------------------------|---------------------|-----------------|
| Multi-infarct dementia due to atherosclerosis                          | 290.40, 440.9       | F01.50, I70.209 |
| Transient ischemic attack in basilar artery distribution on medication | 435                 | G45.0           |
| Vertebrobasilar TIAs                                                   | 435.3               | G45.0           |
| VBI (vertebrobasilar insufficiency)                                    | 435.3               | G45.0           |
| Vertebrobasilar artery insufficiency                                   | 435.3               | G45.0           |
| Top of basilar syndrome                                                | 352.6               | G45.0           |
| TIA involving basilar artery                                           | 435                 | G45.0           |
| Transient ischemic attack involving basilar artery                     | 435                 | G45.0           |
| Transient ischemic attack involving vertebral artery                   | 435.1               | G45.0           |
| TIA involving vertebral artery                                         | 435.1               | G45.0           |
| Vertebro-basilar artery syndrome                                       |                     | G45.0           |
| Insufficiency of basilar, carotid, and vertebral arteries              | 435.0, 435.1, 435.8 | G45.0, G45.1    |
| Carotid artery syndrome                                                | 435.8               | G45.1           |
| Carotid artery insufficiency syndrome                                  | 435.8               | G45.1           |
| Carotid artery occlusion syndrome                                      | 435.8               | G45.1           |
| Insufficiency, arterial, carotid artery                                | 435.8               | G45.1           |
| Carotid insufficiency                                                  | 435.8               | G45.1           |
| Carotid artery syndrome hemispheric                                    | 435.8               | G45.1           |
| TIA involving left internal carotid artery                             | 435.8               | G45.1           |
| Transient ischemic attack involving right internal carotid artery      | 435.8               | G45.1           |
| Transient ischemic attack involving carotid artery                     | 435.8               | G45.1           |
| TIA involving carotid artery                                           | 435.8               | G45.1           |
| TIA involving right internal carotid artery                            | 435.8               | G45.1           |
| Transient ischemic attack involving left internal carotid artery       | 435.8               | G45.1           |
| Hemispheric carotid artery syndrome                                    | 435.8               | G45.1           |
| Transient ischemic attack involving internal carotid artery            | 435.8               | G45.1           |
| Carotid artery syndrome (hemispheric)                                  | 435.8               | G45.1           |
| Carotid artery syndrome (hemispheric)                                  |                     | G45.1           |

|                                                                        |        |       |
|------------------------------------------------------------------------|--------|-------|
| Multiple and bilateral precerebral artery syndromes                    | 433.3  | G45.2 |
| Multiple and bilateral precerebral artery syndromes                    |        | G45.2 |
| Amaurosis fugax                                                        | 362.34 | G45.3 |
| AF (amaurosis fugax)                                                   | 362.34 | G45.3 |
| AFX (amaurosis fugax)                                                  | 362.34 | G45.3 |
| Amaurosis fugax of right eye                                           | 362.34 | G45.3 |
| Amaurosis fugax, right eye                                             | 362.34 | G45.3 |
| Amaurosis fugax of left eye                                            | 362.34 | G45.3 |
| Amaurosis fugax, left eye                                              | 362.34 | G45.3 |
| Amaurosis fugax, both eyes                                             | 362.34 | G45.3 |
| Bilateral amaurosis fugax                                              | 362.34 | G45.3 |
| Retinal amaurosis fugax                                                | 362.34 | G45.3 |
| Recurrent amaurosis fugax                                              | 362.34 | G45.3 |
| Amaurosis fugax                                                        |        | G45.3 |
| Subclavian steal syndrome                                              | 435.2  | G45.8 |
| Other specified transient cerebral ischemias                           | 435.8  | G45.8 |
| Brachial-basilar insufficiency syndrome                                | 435.2  | G45.8 |
| Steal syndrome, subclavian                                             | 435.2  | G45.8 |
| Anterior circulation transient ischemic attack                         | 435.9  | G45.8 |
| Subclavian artery occlusive syndrome                                   | 435.2  | G45.8 |
| Steal syndrome, basilar                                                | 435.2  | G45.8 |
| Acute cerebrovascul insuff, transient focal neurologic signs/symptoms  | 435.9  | G45.8 |
| Acute cerebrovascular insufficiency transient focal neurologic deficit | 435.9  | G45.8 |
| Acute posterior circulation transient ischemic attack                  | 435.9  | G45.8 |
| Acute anterior circulation transient ischemic attack                   | 435.9  | G45.8 |
| Transient ischemic attack, anterior circulation, acute                 | 435.9  | G45.8 |
| Transient ischemic attack, posterior circulation, acute                | 435.9  | G45.8 |

|                                                                                          |       |               |
|------------------------------------------------------------------------------------------|-------|---------------|
| Acute anterior circulation TIA                                                           | 435.9 | G45.8         |
| Transient ischemic attack in carotid artery distribution on medication                   | 435.8 | G45.8         |
| Acute cerebrovascular insufficiency with transient focal neurological signs and symptoms | 435.9 | G45.8         |
| Other transient cerebral ischemic attacks and related syndromes                          | 435.8 | G45.8         |
| Other transient cerebral ischemic attacks and related syndromes                          |       | G45.8         |
| Crescendo transient ischemic attacks                                                     | 435.8 | G45.8         |
| Transient brainstem ischemia                                                             | 435.8 | G45.8         |
| Postoperative transient ischemic attack (TIA)                                            | 435.8 | G45.8, I97.89 |
| Postoperative transient cerebral ischemia                                                | 435.8 | G45.8, I97.89 |
| Unspecified transient cerebral ischemia                                                  | 435.9 | G45.9         |
| Intermittent cerebral ischemia                                                           | 435.9 | G45.9         |
| TIA (transient ischemic attack)                                                          | 435.9 | G45.9         |
| Transient ischemic attack                                                                | 435.9 | G45.9         |
| Transient ischemic attack (TIA)                                                          | 435.9 | G45.9         |
| Transient cerebral ischemia                                                              | 435.9 | G45.9         |
| Transient cerebral ischemic attack                                                       | 435.9 | G45.9         |
| Brain TIA                                                                                | 435.9 | G45.9         |
| Transient ischemic attack, acute                                                         | 435.9 | G45.9         |
| Transient cerebrovascular ischemia                                                       | 435.9 | G45.9         |
| Cerebrovascular ischemia, transient                                                      | 435.9 | G45.9         |
| Precerebral artery insufficiency                                                         | 435.9 | G45.9         |
| Insufficiency, arterial, precerebral                                                     | 435.9 | G45.9         |
| Transient ischemic attack on medication                                                  | 435.9 | G45.9         |
| TIA on medication                                                                        | 435.9 | G45.9         |
| Transient ischemic attack with other course                                              | 435.9 | G45.9         |
| Transient cerebral ischemia, unspecified transient cerebral ischemia type                | 435.9 | G45.9         |
| Transient cerebral ischemic attack, unspecified                                          | 435.9 | G45.9         |

|                                                         |              |              |
|---------------------------------------------------------|--------------|--------------|
| Transient cerebral ischemia, unspecified type           | 435.9        | G45.9        |
| Transient cerebral ischemic attack, unspecified         |              | G45.9        |
| Transient ischemic attack with visual impairment        | 435.9, 369.9 | G45.9, H54.7 |
| Vascular syndromes of brain in cerebrovascular diseases |              | G46          |
| Middle cerebral artery syndrome                         | 434.9        | G46.0        |
| Middle cerebral artery syndrome                         |              | G46.0        |
| Anterior cerebral artery syndrome                       | 434.9        | G46.1        |
| Anterior cerebral artery syndrome                       |              | G46.1        |
| Posterior cerebral artery syndrome                      | 434.9        | G46.2        |
| Posterior cerebral artery syndrome                      |              | G46.2        |
| Ventral medullary syndrome                              | 437.8        | G46.3        |
| Foville's peduncular syndrome                           | 344.89       | G46.3        |
| Millard-Gubler syndrome                                 | 344.89       | G46.3        |
| Benedikt's syndrome                                     | 344.89       | G46.3        |
| Mesencephalic tegmental paralysis                       | 344.89       | G46.3        |
| Tegmentum syndrome                                      | 344.89       | G46.3        |
| Weber-Gubler syndrome                                   | 344.89       | G46.3        |
| Facial-abducens-hemiplegia syndrome                     | 344.89       | G46.3        |
| Tegmental syndrome                                      | 344.89       | G46.3        |
| Millard Gubler syndrome                                 | 344.89       | G46.3        |
| Benedict syndrome                                       | 344.89       | G46.3        |
| Millard Gublar syndrome                                 | 344.89       | G46.3        |
| Posterior inferior cerebellar artery syndrome           | 434.91       | G46.3        |
| Inferior cerebellar artery syndrome                     | 434.91       | G46.3        |
| Lateral medullary syndrome                              | 434.91       | G46.3        |
| Wallenberg's syndrome                                   | 434.91       | G46.3        |
| Lateral bulbar syndrome                                 | 434.91       | G46.3        |
| Vieuxseux-Wallenberg syndrome                           | 434.91       | G46.3        |
| Wallenberg syndrome                                     | 434.91       | G46.3        |
| Wallenbergs syndrome                                    | 434.91       | G46.3        |
| LMS (lateral medullary syndrome)                        | 434.91       | G46.3        |
| Dorsolateral medullary syndrome                         | 434.91       | G46.3        |

|                                                                                                                                |                |                |
|--------------------------------------------------------------------------------------------------------------------------------|----------------|----------------|
| Weber syndrome                                                                                                                 | 344.89         | G46.3          |
| Brain stem stroke syndrome                                                                                                     | 436            | G46.3          |
| Brainstem stroke syndrome                                                                                                      | 436            | G46.3          |
| Stroke, Wallenberg's syndrome                                                                                                  | 434.91         | G46.3          |
| Brain stem stroke syndrome                                                                                                     |                | G46.3          |
| Cerebellar stroke syndrome                                                                                                     | 436            | G46.4          |
| Cerebellar stroke syndrome                                                                                                     |                | G46.4          |
| Pure motor lacunar syndrome                                                                                                    | 434.91         | G46.5          |
| Pure motor lacunar syndrome                                                                                                    |                | G46.5          |
| Pure sensory lacunar syndrome                                                                                                  | 434.91         | G46.6          |
| Pure sensory lacunar syndrome                                                                                                  |                | G46.6          |
| Lacunar syndrome                                                                                                               | 437.8          | G46.7          |
| Dysarthria-clumsy hand syndrome                                                                                                | 434.91, 784.51 | G46.7          |
| Other lacunar syndromes                                                                                                        | 437.8          | G46.7          |
| Other lacunar syndromes                                                                                                        |                | G46.7          |
| Other vascular syndromes of brain in cerebrovascular diseases                                                                  | 437.8          | G46.8          |
| Other vascular syndromes of brain in cerebrovascular diseases                                                                  |                | G46.8          |
| Flaccid hemiplegia due to nontraumatic subarachnoid hemorrhage, unspecified hemiplegia laterality                              | 342.00, 430    | G81.00, I60.9  |
| Flaccid hemiplegia due to nontraumatic intraparenchymal hemorrhage of brain, unspecified hemiplegia laterality                 | 342.00, 431    | G81.00, I61.9  |
| Flaccid hemiplegia due to other nontraumatic intracranial hemorrhage, unspecified hemiplegia laterality                        | 342.00, 432.9  | G81.00, I62.9  |
| Flaccid hemiplegia due to infarction of brain, unspecified hemiplegia laterality                                               | 342.00, 434.91 | G81.00, I63.9  |
| Flaccid hemiplegia due to other cerebrovascular disease, unspecified hemiplegia laterality                                     | 342.00, 437.8  | G81.00, I67.89 |
| Flaccid hemiplegia due to cerebrovascular disease, unspecified cerebrovascular disease type, unspecified hemiplegia laterality | 342.00, 437.9  | G81.00, I67.9  |

|                                                                                                                                |                |               |
|--------------------------------------------------------------------------------------------------------------------------------|----------------|---------------|
| Flaccid hemiplegia of right dominant side due to cerebrovascular disease, unspecified cerebrovascular disease type             | 342.01, 437.9  | G81.01, I67.9 |
| Flaccid hemiplegia of left dominant side due to cerebrovascular disease, unspecified cerebrovascular disease type              | 342.01, 437.9  | G81.02, I67.9 |
| Flaccid hemiplegia of right nondominant side due to cerebrovascular disease, unspecified cerebrovascular disease type          | 342.02, 437.9  | G81.03, I67.9 |
| Flaccid hemiplegia of left nondominant side due to cerebrovascular disease, unspecified cerebrovascular disease type           | 342.02, 437.9  | G81.04, I67.9 |
| Spastic hemiplegia due to nontraumatic intraparenchymal hemorrhage of brain, unspecified hemiplegia laterality                 | 342.10, 431    | G81.10, I61.9 |
| Spastic hemiplegia due to infarction of brain, unspecified hemiplegia laterality                                               | 342.10, 434.91 | G81.10, I63.9 |
| Spastic hemiplegia due to cerebrovascular disease, unspecified cerebrovascular disease type, unspecified hemiplegia laterality | 342.10, 437.9  | G81.10, I67.9 |
| Spastic hemiplegia of right dominant side due to cerebrovascular disease, unspecified cerebrovascular disease type             | 342.11, 437.9  | G81.11, I67.9 |
| Spastic hemiplegia of left dominant side due to cerebrovascular disease, unspecified cerebrovascular disease type              | 342.11, 437.9  | G81.12, I67.9 |
| Spastic hemiplegia of right nondominant side due to cerebrovascular disease, unspecified cerebrovascular disease type          | 342.12, 437.9  | G81.13, I67.9 |
| Spastic hemiplegia of left nondominant side due to cerebrovascular disease, unspecified cerebrovascular disease type           | 342.12, 437.9  | G81.14, I67.9 |
| Hemiplegia due to nontraumatic subarachnoid hemorrhage, unspecified hemiplegia laterality, unspecified hemiplegia type         | 342.90, 430    | G81.90, I60.9 |



|                                                                                                                                                     |                |                |
|-----------------------------------------------------------------------------------------------------------------------------------------------------|----------------|----------------|
| Hemiplegia due to nontraumatic intraparenchymal hemorrhage of brain, unspecified hemiplegia laterality, unspecified hemiplegia type                 | 342.90, 431    | G81.90, I61.9  |
| Hemiplegia due to other nontraumatic intracranial hemorrhage, unspecified hemiplegia laterality, unspecified hemiplegia type                        | 342.90, 432.9  | G81.90, I62.9  |
| Hemiplegia due to infarction of brain, unspecified hemiplegia laterality, unspecified hemiplegia type                                               | 342.90, 434.91 | G81.90, I63.9  |
| Hemiplegia due to other cerebrovascular disease, unspecified hemiplegia laterality, unspecified hemiplegia type                                     | 342.90, 437.8  | G81.90, I67.89 |
| Hemiplegia due to cerebrovascular disease, unspecified cerebrovascular disease type, unspecified hemiplegia laterality, unspecified hemiplegia type | 342.90, 437.9  | G81.90, I67.9  |
| Hemiplegia of left nondominant side due to nontraumatic intraparenchymal hemorrhage of brain, unspecified hemiplegia type                           | 438.22, 431    | G81.94, I61.9  |
| Hemiplegia of left nondominant side due to infarction of brain, unspecified hemiplegia type                                                         | 438.22, 429.79 | G81.94, I63.9  |
| Anoxic-ischemic encephalopathy                                                                                                                      | 348.1, 437.1   | G93.1, I67.82  |
| Mild anoxic-ischemic encephalopathy                                                                                                                 | 348.1, 437.1   | G93.1, I67.82  |
| Moderate anoxic-ischemic encephalopathy                                                                                                             | 348.1, 437.1   | G93.1, I67.82  |
| Severe anoxic-ischemic encephalopathy                                                                                                               | 348.1, 437.1   | G93.1, I67.82  |
| Compression of brain due to nontraumatic subarachnoid hemorrhage                                                                                    | 348.4, 430     | G93.5, I60.9   |
| Compression of brain due to spontaneous cerebral hemorrhage                                                                                         | 348.4, 431     | G93.5, I61.9   |
| TIA occurring during procedure                                                                                                                      | 997.01, 435.9  | G97.81, G45.9  |
| Transient ischemic attack during procedure                                                                                                          | 997.01, 435.9  | G97.81, G45.9  |

|                                                                 |               |               |
|-----------------------------------------------------------------|---------------|---------------|
| Transient ischemic attack due to procedure                      | 997.01, 435.9 | G97.82, G45.9 |
| TIA resulting from procedure                                    | 997.01, 435.9 | G97.82, G45.9 |
| Transient retinal artery occlusion                              |               | H34.0         |
| Transient arterial occlusion of retina                          | 362.34        | H34.00        |
| Transient arterial retinal occlusion                            | 362.34        | H34.00        |
| Occlusion, retinal, arterial, transient                         | 362.34        | H34.00        |
| Transient retinal artery occlusion                              | 362.34        | H34.00        |
| Transient arterial retinal occlusion, unspecified laterality    | 362.34        | H34.00        |
| Occlusion, retinal, arterial, transient, unspecified laterality | 362.34        | H34.00        |
| Transient arterial occlusion of retina, unspecified laterality  | 362.34        | H34.00        |
| Transient retinal artery occlusion, unspecified laterality      | 362.34        | H34.00        |
| Transient retinal artery occlusion, unspecified eye             | 362.34        | H34.00        |
| Transient retinal artery occlusion, unspecified eye             |               | H34.00        |
| Transient arterial retinal occlusion of right eye               | 362.34        | H34.01        |
| Transient arterial retinal occlusion, right                     | 362.34        | H34.01        |
| Transient arterial occlusion of retina, right                   | 362.34        | H34.01        |
| Transient retinal arterial occlusion, right                     | 362.34        | H34.01        |
| Transient retinal artery occlusion of right eye                 | 362.34        | H34.01        |
| Transient retinal artery occlusion, right                       | 362.34        | H34.01        |
| Occlusion, retinal, arterial, transient, right                  | 362.34        | H34.01        |
| Transient retinal artery occlusion, right eye                   | 362.34        | H34.01        |
| Transient retinal artery occlusion, right eye                   |               | H34.01        |
| Transient arterial retinal occlusion of left eye                | 362.34        | H34.02        |
| Transient arterial retinal occlusion, left                      | 362.34        | H34.02        |
| Transient retinal arterial occlusion, left                      | 362.34        | H34.02        |

|                                                               |               |              |
|---------------------------------------------------------------|---------------|--------------|
| Transient arterial occlusion of retina, left                  | 362.34        | H34.02       |
| Transient retinal artery occlusion of left eye                | 362.34        | H34.02       |
| Transient retinal artery occlusion, left                      | 362.34        | H34.02       |
| Occlusion, retinal, arterial, transient, left                 | 362.34        | H34.02       |
| Transient retinal artery occlusion, left eye                  | 362.34        | H34.02       |
| Transient retinal artery occlusion, left eye                  |               | H34.02       |
| Transient arterial retinal occlusion of both eyes             | 362.34        | H34.03       |
| Transient arterial retinal occlusion, bilateral               | 362.34        | H34.03       |
| Transient retinal arterial occlusion, bilateral               | 362.34        | H34.03       |
| Transient arterial occlusion of retina, bilateral             | 362.34        | H34.03       |
| Transient retinal artery occlusion of both eyes               | 362.34        | H34.03       |
| Transient retinal artery occlusion, bilateral                 | 362.34        | H34.03       |
| Occlusion, retinal, arterial, transient, bilateral            | 362.34        | H34.03       |
| Transient retinal artery occlusion, bilateral                 |               | H34.03       |
| Benign secondary hypertension due to renal artery stenosis    | 405.11, 440.1 | I15.0, I70.1 |
| Malignant secondary hypertension due to renal artery stenosis | 405.01, 440.1 | I15.0, I70.1 |
| Angina pectoris                                               |               | I20          |
| Intermediate coronary syndrome                                | 411.1         | I20.0        |
| Preinfarction syndrome                                        | 411.1         | I20.0        |
| Crescendo angina                                              | 411.1         | I20.0        |
| Unstable angina                                               | 411.1         | I20.0        |
| Impending infarction                                          | 411.1         | I20.0        |
| Preinfarction angina                                          | 411.1         | I20.0        |
| Angina pectoris, unstable                                     | 411.1         | I20.0        |
| Angina, preinfarctional                                       | 411.1         | I20.0        |
| Unstable angina pectoris                                      | 411.1         | I20.0        |
| Intermediate ischemic heart syndrome                          | 411.1         | I20.0        |

|                                                               |        |       |
|---------------------------------------------------------------|--------|-------|
| Angina pectoris, crescendo                                    | 411.1  | I20.0 |
| Impending, myocardial infarction                              | 411.1  | I20.0 |
| Myocardial preinfarction syndrome                             | 411.1  | I20.0 |
| Pre-infarction syndrome                                       | 411.1  | I20.0 |
| Worsening angina                                              | 413.9  | I20.0 |
| Angina pectoris, preinfarctional                              | 411.1  | I20.0 |
| Accelerating angina                                           | 411.1  | I20.0 |
| Progressive angina                                            | 411.1  | I20.0 |
| Acute coronary insufficiency syndrome                         | 411.1  | I20.0 |
| Unstable chest pain due to insufficient blood supply to heart | 411.89 | I20.0 |
| Myocardial infarction, impending                              | 411.1  | I20.0 |
| Impending myocardial infarction                               | 411.1  | I20.0 |
| Aborted myocardial infarction                                 | 411.1  | I20.0 |
| Unstable angina                                               |        | I20.0 |
| Angina decubitus                                              | 413    | I20.8 |
| Angina of effort                                              | 413.9  | I20.8 |
| Anginal chest pain at rest                                    | 413    | I20.8 |
| Nocturnal angina                                              | 413    | I20.8 |
| Syncope anginosa                                              | 413.9  | I20.8 |
| Angina effort                                                 | 413.9  | I20.8 |
| Effort angina                                                 | 413.9  | I20.8 |
| Refractory angina                                             | 413.9  | I20.8 |
| Exertional angina                                             | 413.9  | I20.8 |
| Stable angina                                                 | 413.9  | I20.8 |
| Angina at rest                                                | 413.9  | I20.8 |
| Exercise-induced angina                                       | 413.9  | I20.8 |
| Angina pectoris, nocturnal                                    | 413    | I20.8 |
| Anginal equivalent                                            | 413.9  | I20.8 |
| Chronic stable angina                                         | 413.9  | I20.8 |
| Other forms of angina pectoris                                | 413.9  | I20.8 |
| Stable angina pectoris                                        | 413.9  | I20.8 |
| Other forms of angina pectoris                                |        | I20.8 |
| Other and unspecified angina pectoris                         | 413.9  | I20.9 |
| Anginal syndrome                                              | 413.9  | I20.9 |
| Cardiac angina                                                | 413.9  | I20.9 |
| Angina, class I                                               | 413.9  | I20.9 |

|                                                                             |               |                |
|-----------------------------------------------------------------------------|---------------|----------------|
| Angina, class II                                                            | 413.9         | I20.9          |
| Angina, class III                                                           | 413.9         | I20.9          |
| Angina, class IV                                                            | 413.9         | I20.9          |
| Status anginosus                                                            | 413.9         | I20.9          |
| Angina pectoris syndrome                                                    | 413.9         | I20.9          |
| Anginal pain                                                                | 413.9         | I20.9          |
| Angor pectoris                                                              | 413.9         | I20.9          |
| Cardiac angina syndrome                                                     | 413.9         | I20.9          |
| Angina pectoris with normal coronary arteriogram                            | 413.9         | I20.9          |
| AP (angina pectoris)                                                        | 413.9         | I20.9          |
| Angina pectoris                                                             | 413.9         | I20.9          |
| Acute angina                                                                | 413.9         | I20.9          |
| New-onset angina                                                            | 413.9         | I20.9          |
| Typical angina                                                              | 413.9         | I20.9          |
| 2 or more angina events in past 24 hours                                    | 413.9         | I20.9          |
| Angina pectoris, unspecified                                                | 413.9         | I20.9          |
| Angina pectoris without myocardial infarction                               | 413.9         | I20.9          |
| Angina pectoris, unspecified                                                |               | I20.9          |
| Recurrent angina status post coronary artery bypass graft                   | 413.9, V45.81 | I20.9, Z95.1   |
| Recurrent angina status post coronary stent placement                       | 413.9, V45.81 | I20.9, Z95.5   |
| Recurrent angina status post percutaneous transluminal coronary angioplasty | 413.9, V45.82 | I20.9, Z98.61  |
| Recurrent angina status post rotational atherectomy                         | 413.9, V45.89 | I20.9, Z98.890 |
| Recurrent angina status post directional coronary atherectomy               | 413.9, V45.89 | I20.9, Z98.890 |
| Acute myocardial infarction                                                 |               | I21            |
| ST elevation (STEMI) myocardial infarction of anterior wall                 |               | I21.0          |
| ST elevation myocardial infarction involving left main coronary artery      | 410.11        | I21.01         |

|                                                                                                            |        |        |
|------------------------------------------------------------------------------------------------------------|--------|--------|
| ST elevation myocardial infarction (STEMI) involving left main coronary artery in recovery phase           | 410.1  | I21.01 |
| ST elevation myocardial infarction (STEMI) involving left main coronary artery with complication           | 410.1  | I21.01 |
| Acute Q wave myocardial infarction involving left main coronary artery                                     | 410.1  | I21.01 |
| Acute ST elevation myocardial infarction involving left main coronary artery                               | 410.1  | I21.01 |
| Acute non-Q wave ST elevation myocardial infarction (STEMI) involving left main coronary artery            | 410.1  | I21.01 |
| Widespread acute non-Q wave ST elevation myocardial infarction (STEMI) involving left main coronary artery | 410.1  | I21.01 |
| Widespread acute Q wave ST elevation myocardial infarction (STEMI) involving left main coronary artery     | 410.1  | I21.01 |
| Non-Q wave ST elevation myocardial infarction (STEMI) involving left main coronary artery                  | 410.1  | I21.01 |
| Silent ST elevation myocardial infarction (STEMI) involving left main coronary artery                      | 410.1  | I21.01 |
| Acute ST elevation myocardial infarction (STEMI) involving left main coronary artery                       | 410.1  | I21.01 |
| Acute myocardial infarction involving left main coronary artery                                            | 410.11 | I21.01 |
| Myocardial infarction involving left main coronary artery                                                  | 410.1  | I21.01 |
| Acute Q wave myocardial infarction involving left coronary artery                                          | 410.1  | I21.01 |
| Acute ST elevation myocardial infarction (STEMI) involving anomalous left coronary artery                  | 410.1  | I21.01 |

|                                                                                                                                |        |        |
|--------------------------------------------------------------------------------------------------------------------------------|--------|--------|
| Acute non-Q wave ST elevation myocardial infarction (STEMI) involving left coronary artery                                     | 410.1  | I21.01 |
| Acute ST elevation myocardial infarction (STEMI) involving left main coronary artery without development of Q waves            | 410.1  | I21.01 |
| Widespread acute ST elevation myocardial infarction (STEMI) involving left main coronary artery without development of Q waves | 410.1  | I21.01 |
| Acute ST elevation myocardial infarction (STEMI) involving left coronary artery without development of Q waves                 | 410.1  | I21.01 |
| ST elevation myocardial infarction (STEMI) involving left main coronary artery without development of Q waves                  | 410.1  | I21.01 |
| ST elevation (STEMI) myocardial infarction involving left main coronary artery                                                 | 410.11 | I21.01 |
| STEMI involving left main coronary artery                                                                                      | 410.11 | I21.01 |
| ST elevation (STEMI) myocardial infarction involving left main coronary artery                                                 |        | I21.01 |
| ST elevation myocardial infarction involving left anterior descending coronary artery                                          | 410.1  | I21.02 |
| ST elevation (STEMI) myocardial infarction involving left anterior descending coronary artery                                  | 410.1  | I21.02 |
| ST elevation myocardial infarction (STEMI) involving left anterior descending (LAD) coronary artery with complication          | 410.1  | I21.02 |
| ST elevation myocardial infarction (STEMI) involving left anterior descending (LAD) coronary artery in recovery phase          | 410.1  | I21.02 |
| Acute Q wave myocardial infarction involving left anterior descending (LAD) coronary artery                                    | 410.1  | I21.02 |

|                                                                                                                                          |        |        |
|------------------------------------------------------------------------------------------------------------------------------------------|--------|--------|
| Acute ST elevation myocardial infarction involving left anterior descending coronary artery                                              | 410.1  | I21.02 |
| Acute non-Q wave ST elevation myocardial infarction (STEMI) involving left anterior descending (LAD) coronary artery                     | 410.8  | I21.02 |
| Widespread acute non-Q wave ST elevation myocardial infarction (STEMI) involving left anterior descending (LAD) coronary artery          | 410.1  | I21.02 |
| Widespread acute Q wave ST elevation myocardial infarction (STEMI) involving left anterior descending (LAD) coronary artery              | 410.1  | I21.02 |
| Non-Q wave ST elevation myocardial infarction (STEMI) involving left anterior descending (LAD) coronary artery                           | 410.1  | I21.02 |
| Silent ST elevation myocardial infarction (STEMI) involving left anterior descending (LAD) coronary artery of anterior wall              | 410.1  | I21.02 |
| Acute ST elevation myocardial infarction (STEMI) involving left anterior descending coronary artery                                      | 410.1  | I21.02 |
| Acute myocardial infarction involving left anterior descending (LAD) coronary artery                                                     | 410.11 | I21.02 |
| Myocardial infarction involving left anterior descending (LAD) coronary artery                                                           | 410.1  | I21.02 |
| ST elevation myocardial infarction involving left anterior descending (LAD) coronary artery                                              | 410.1  | I21.02 |
| Acute ST elevation myocardial infarction (STEMI) involving left anterior descending (LAD) coronary artery                                | 410.1  | I21.02 |
| Acute ST elevation myocardial infarction (STEMI) involving left anterior descending (LAD) coronary artery without development of Q waves | 410.8  | I21.02 |



|                                                                                                                                                     |        |        |
|-----------------------------------------------------------------------------------------------------------------------------------------------------|--------|--------|
| Widespread acute ST elevation myocardial infarction (STEMI) involving left anterior descending (LAD) coronary artery without development of Q waves | 410.1  | I21.02 |
| ST elevation myocardial infarction (STEMI) involving left anterior descending (LAD) coronary artery without development of Q waves                  | 410.1  | I21.02 |
| STEMI involving left anterior descending coronary artery                                                                                            | 410.1  | I21.02 |
| ST elevation (STEMI) myocardial infarction involving left anterior descending coronary artery                                                       |        | I21.02 |
| Acute myocardial infarction of anterolateral wall, episode of care unspecified                                                                      | 410    | I21.09 |
| Acute myocardial infarction of anterolateral wall, initial episode of care                                                                          | 410.01 | I21.09 |
| Acute myocardial infarction of anterolateral wall, subsequent episode of care                                                                       | 410.02 | I21.09 |
| Acute myocardial infarction of other anterior wall, episode of care unspecified                                                                     | 410.1  | I21.09 |
| Acute myocardial infarction of other anterior wall, initial episode of care                                                                         | 410.11 | I21.09 |
| Acute myocardial infarction of other anterior wall, subsequent episode of care                                                                      | 410.12 | I21.09 |
| Acute myocardial infarction of anterior wall                                                                                                        | 410.1  | I21.09 |
| Acute anteroapical myocardial infarction                                                                                                            | 410.1  | I21.09 |
| Acute anteroseptal myocardial infarction                                                                                                            | 410.1  | I21.09 |
| Acute myocardial infarction of anterolateral wall                                                                                                   | 410    | I21.09 |
| ALMI (anterolateral wall myocardial infarction)                                                                                                     | 410    | I21.09 |
| Acute myocardial infarction of anterior wall, initial episode of care                                                                               | 410.11 | I21.09 |

|                                                                  |        |        |
|------------------------------------------------------------------|--------|--------|
| Acute anterolateral myocardial infarction                        | 410    | I21.09 |
| Additional acute myocardial infarction (anterolateral wall)      | 410.02 | I21.09 |
| Additional heart attack (anterolateral wall)                     | 410.02 | I21.09 |
| Anterior myocardial infarction                                   | 410.1  | I21.09 |
| Acute MI anterior lateral subsequent episode care                | 410.02 | I21.09 |
| Acute MI anterior wall first episode care                        | 410.11 | I21.09 |
| Acute MI anterior wall subsequent episode care                   | 410.12 | I21.09 |
| ST elevation myocardial infarction (STEMI) of anterolateral wall | 410    | I21.09 |
| ST elevation myocardial infarction (STEMI) of anterior wall      | 410.1  | I21.09 |
| AMI anterior wall                                                | 410.1  | I21.09 |
| AMI anterolateral wall                                           | 410    | I21.09 |
| Acute anterior myocardial infarction                             | 410.1  | I21.09 |
| F/u of anterolateral myocardial infarction                       | 410.02 | I21.09 |
| Follow-up of anterolateral myocardial infarction                 | 410.02 | I21.09 |
| F/u of acute anterolateral myocardial infarction                 | 410.02 | I21.09 |
| Follow-up of acute anterolateral myocardial infarction           | 410.02 | I21.09 |
| Acute transmural myocardial infarction of anterior wall          | 410.1  | I21.09 |
| Acute transmural anterior wall MI                                | 410.1  | I21.09 |
| Myocardial infarction, anterior wall, initial care               | 410.11 | I21.09 |
| Myocardial infarction, anterolateral wall                        | 410    | I21.09 |
| Myocardial infarction, anterolateral wall, initial care          | 410.01 | I21.09 |
| Myocardial infarction, anterior wall                             | 410.1  | I21.09 |
| Myocardial infarction, anterior wall, subsequent care            | 410.12 | I21.09 |

|                                                                        |        |        |
|------------------------------------------------------------------------|--------|--------|
| Myocardial infarction, anterolateral wall, subsequent care             | 410.02 | I21.09 |
| Myocardial infarction, anterior, acute, initial episode                | 410.11 | I21.09 |
| Myocardial infarction, anterolateral, acute                            | 410    | I21.09 |
| Myocardial infarction, anterolateral wall, acute                       | 410    | I21.09 |
| Acute transmural myocardial infarction of anterolateral wall           | 410.01 | I21.09 |
| Anteroapical myocardial infarction                                     | 410.1  | I21.09 |
| Anteroseptal myocardial infarction                                     | 410.1  | I21.09 |
| Anterolateral myocardial infarction                                    | 410    | I21.09 |
| Myocardial infarction of anterolateral wall                            | 410    | I21.09 |
| Acute MI, anterior wall                                                | 410.1  | I21.09 |
| Acute MI, anterolateral wall                                           | 410    | I21.09 |
| Acute MI, anterior wall, initial episode of care                       | 410.11 | I21.09 |
| Acute MI, anterolateral wall, initial episode of care                  | 410.01 | I21.09 |
| Acute MI, anterior wall, subsequent episode of care                    | 410.12 | I21.09 |
| Acute MI, anterolateral wall, subsequent episode of care               | 410.02 | I21.09 |
| Myocardial infarction, anteroseptal                                    | 410.1  | I21.09 |
| Acute anterior wall MI                                                 | 410.1  | I21.09 |
| Acute anterolateral wall MI                                            | 410    | I21.09 |
| Anterolateral wall myocardial infarction                               | 410    | I21.09 |
| Acute transmural myocardial infarct anterior wall, initial hospitaliz  | 410.11 | I21.09 |
| Transmural anteroseptal myocardial infarction, initial hospitalization | 410.11 | I21.09 |
| Transmural anteroapical myocardial infarction, initial hospitalization | 410.11 | I21.09 |

|                                                                                                                 |        |        |
|-----------------------------------------------------------------------------------------------------------------|--------|--------|
| Acute myocardial infarction, of anterolateral wall, subsequent episode of care                                  | 410.02 | I21.09 |
| Acute myocardial infarction of anterior wall, subsequent episode of care                                        | 410.12 | I21.09 |
| ST elevation myocardial infarction (STEMI) of anterolateral wall, initial episode of care                       | 410.01 | I21.09 |
| ST elevation myocardial infarction (STEMI) of anterolateral wall, subsequent episode of care                    | 410.02 | I21.09 |
| ST elevation myocardial infarction (STEMI) of anterior wall, initial episode of care                            | 410.11 | I21.09 |
| ST elevation myocardial infarction (STEMI) of anterior wall, subsequent episode of care                         | 410.12 | I21.09 |
| Acute transmural myocardial infarction of anterior wall, initial hospitalization                                | 410.11 | I21.09 |
| Transmural myocardial infarction of anterolateral wall, initial hospitalization                                 | 410.01 | I21.09 |
| ST segment elevation myocardial infarction (STEMI) of anterolateral wall, subsequent episode of care            | 410.02 | I21.09 |
| Acute myocardial infarction of other anterior wall                                                              | 410.1  | I21.09 |
| Acute Q wave myocardial infarction of anteroseptal wall                                                         | 410.1  | I21.09 |
| Acute Q wave myocardial infarction of anterolateral wall                                                        | 410.01 | I21.09 |
| Acute myocardial infarction of anterior wall, subsequent to initial episode of care                             | 410.12 | I21.09 |
| Acute myocardial infarction of anterolateral wall, subsequent to initial episode of care                        | 410.02 | I21.09 |
| ST segment elevation myocardial infarction (STEMI) of anterolateral wall, subsequent to initial episode of care | 410.02 | I21.09 |

|                                                                                                   |        |        |
|---------------------------------------------------------------------------------------------------|--------|--------|
| Anterior wall myocardial infarction                                                               | 410.1  | I21.09 |
| Myocardial infarction of anterior wall                                                            | 410.1  | I21.09 |
| Anterior ST segment elevation                                                                     | 410.1  | I21.09 |
| ST elevation myocardial infarction (STEMI) involving other coronary artery of anterior wall       | 410.1  | I21.09 |
| Acute ST elevation myocardial infarction (STEMI) involving other coronary artery of anterior wall | 410.1  | I21.09 |
| Acute myocardial infarction involving other coronary artery of anterior wall                      | 410.1  | I21.09 |
| Myocardial infarction involving other coronary artery of anterior wall                            | 410.1  | I21.09 |
| AMI anterolateral wall                                                                            | 410    | I21.09 |
| Anterolateral AMI, initial episode                                                                | 410.01 | I21.09 |
| Anterior AMI NEC, episode                                                                         | 410.1  | I21.09 |
| Anterior AMI NEC, initial episode                                                                 | 410.11 | I21.09 |
| AMI anterolateral, subsequent                                                                     | 410.02 | I21.09 |
| AMI anterior wall, subsequent                                                                     | 410.12 | I21.09 |
| Acute myocardial infarction of other anterior wall, subsequent to initial episode of care         | 410.12 | I21.09 |
| Acute ST elevation myocardial infarction (STEMI) of anterolateral wall                            | 410.1  | I21.09 |
| Acute ST elevation myocardial infarction (STEMI) of anteroseptal wall                             | 410.1  | I21.09 |
| ST elevation (STEMI) myocardial infarction involving other coronary artery of anterior wall       | 410.1  | I21.09 |
| Acute myocardial infarction of anterior wall involving right ventricle                            | 410.1  | I21.09 |
| Acute ST elevation myocardial infarction (STEMI) of anterior wall involving right ventricle       | 410.1  | I21.09 |
| Acute ST elevation myocardial infarction (STEMI) of anterior wall                                 | 410.1  | I21.09 |

|                                                                                                        |        |                |
|--------------------------------------------------------------------------------------------------------|--------|----------------|
| STEMI involving oth coronary artery of anterior wall                                                   | 410.1  | I21.09         |
| ST elevation (STEMI) myocardial infarction involving other coronary artery of anterior wall (CODE)     | 410.1  | I21.09         |
| ST elevation (STEMI) myocardial infarction involving other coronary artery of anterior wall            |        | I21.09         |
| Anterior and lateral ST segment elevation                                                              | 410    | I21.09, I21.29 |
| ST elevation (STEMI) myocardial infarction of inferior wall                                            |        | I21.1          |
| Transmural myocardial infarction of inferoposterior wall, initial hospitalization                      | 410.31 | I21.11         |
| ST elevation myocardial infarction involving right coronary artery                                     | 410.31 | I21.11         |
| Acute myocardial infarction involving right coronary artery                                            | 410.9  | I21.11         |
| ST elevation myocardial infarction (STEMI) involving right coronary artery in recovery phase           | 410.1  | I21.11         |
| ST elevation myocardial infarction (STEMI) involving right coronary artery with complication           | 410.1  | I21.11         |
| Acute Q wave myocardial infarction involving right coronary artery                                     | 410.1  | I21.11         |
| Acute ST elevation myocardial infarction (STEMI) involving right coronary artery                       | 410.1  | I21.11         |
| Widespread acute non-Q wave ST elevation myocardial infarction (STEMI) involving right coronary artery | 410.1  | I21.11         |
| Widespread acute Q wave ST elevation myocardial infarction (STEMI) involving right coronary artery     | 410.1  | I21.11         |
| Acute non-Q wave ST elevation myocardial infarction (STEMI) involving right coronary artery            | 410.1  | I21.11         |

|                                                                                                                            |        |        |
|----------------------------------------------------------------------------------------------------------------------------|--------|--------|
| Non-Q wave ST elevation myocardial infarction (STEMI) involving right coronary artery                                      | 410.1  | I21.11 |
| Silent ST elevation myocardial infarction (STEMI) involving right coronary artery                                          | 410.1  | I21.11 |
| Myocardial infarction involving right coronary artery                                                                      | 410.3  | I21.11 |
| Acute myocardial infarction due to right coronary artery occlusion                                                         | 410.3  | I21.11 |
| Acute ST elevation myocardial infarction (STEMI) involving right coronary artery without development of Q waves            | 410.1  | I21.11 |
| Widespread acute ST elevation myocardial infarction (STEMI) involving right coronary artery without development of Q waves | 410.1  | I21.11 |
| ST elevation myocardial infarction (STEMI) involving right coronary artery without development of Q waves                  | 410.1  | I21.11 |
| ST elevation (STEMI) myocardial infarction involving right coronary artery                                                 | 410.31 | I21.11 |
| STEMI involving right coronary artery                                                                                      | 410.31 | I21.11 |
| ST elevation (STEMI) myocardial infarction involving right coronary artery                                                 |        | I21.11 |
| Acute myocardial infarction of inferolateral wall, episode of care unspecified                                             | 410.2  | I21.19 |
| Acute myocardial infarction of inferolateral wall, initial episode of care                                                 | 410.21 | I21.19 |
| Acute myocardial infarction of inferolateral wall, subsequent episode of care                                              | 410.22 | I21.19 |
| Acute myocardial infarction of inferoposterior wall, episode of care unspecified                                           | 410.3  | I21.19 |
| Acute myocardial infarction of inferoposterior wall, initial episode of care                                               | 410.31 | I21.19 |

|                                                                                 |        |        |
|---------------------------------------------------------------------------------|--------|--------|
| Acute myocardial infarction of inferoposterior wall, subsequent episode of care | 410.32 | I21.19 |
| Acute myocardial infarction of other inferior wall, episode of care unspecified | 410.4  | I21.19 |
| Acute myocardial infarction of other inferior wall, initial episode of care     | 410.41 | I21.19 |
| Acute myocardial infarction of other inferior wall, subsequent episode of care  | 410.42 | I21.19 |
| Acute myocardial infarction of inferior wall                                    | 410.4  | I21.19 |
| Acute myocardial infarction of diaphragmatic wall                               | 410.4  | I21.19 |
| Acute myocardial infarction of inferoposterior wall                             | 410.3  | I21.19 |
| Acute myocardial infarction of inferolateral wall                               | 410.2  | I21.19 |
| Acute myocardial infarction of inferior wall, initial episode of care           | 410.41 | I21.19 |
| Acute inferior myocardial infarction                                            | 410.4  | I21.19 |
| Additional acute myocardial infarction (inferoposterior wall)                   | 410.32 | I21.19 |
| Additional heart attack (inferoposterior wall)                                  | 410.32 | I21.19 |
| Additional acute myocardial infarction (inferolateral wall)                     | 410.22 | I21.19 |
| Additional heart attack (inferolateral wall)                                    | 410.22 | I21.19 |
| Inferior MI                                                                     | 410.4  | I21.19 |
| Acute MI inferior lateral first episode care                                    | 410.21 | I21.19 |
| Acute MI inferior lateral subsequent episode care                               | 410.22 | I21.19 |
| Acute MI inferior posterior subsequent episode care                             | 410.32 | I21.19 |
| Acute MI inferior subsequent episode care                                       | 410.42 | I21.19 |
| ST elevation myocardial infarction (STEMI) of inferolateral wall                | 410.2  | I21.19 |



|                                                                    |        |        |
|--------------------------------------------------------------------|--------|--------|
| ST elevation myocardial infarction (STEMI) of inferoposterior wall | 410.3  | I21.19 |
| ST elevation myocardial infarction (STEMI) of inferior wall        | 410.4  | I21.19 |
| AMI inferoposterior wall                                           | 410.3  | I21.19 |
| Acute inferolateral myocardial infarction                          | 410.2  | I21.19 |
| F/u of inferolateral myocardial infarction                         | 410.22 | I21.19 |
| Follow-up of acute inferolateral myocardial infarction             | 410.22 | I21.19 |
| Follow-up of inferolateral myocardial infarction                   | 410.22 | I21.19 |
| F/u of acute inferolateral myocardial infarction                   | 410.22 | I21.19 |
| F/u of inferoposterior myocardial infarction                       | 410.32 | I21.19 |
| F/u of acute inferoposterior myocardial infarction                 | 410.32 | I21.19 |
| Follow-up of acute inferoposterior myocardial infarction           | 410.32 | I21.19 |
| Follow-up of inferoposterior myocardial infarction                 | 410.32 | I21.19 |
| Acute transmural myocardial infarction of inferior wall            | 410.4  | I21.19 |
| Acute transmural inferior wall MI                                  | 410.4  | I21.19 |
| Myocardial infarction, inferior wall, initial care                 | 410.41 | I21.19 |
| Myocardial infarction, inferolateral wall                          | 410.2  | I21.19 |
| Myocardial infarction, inferolateral wall, initial care            | 410.21 | I21.19 |
| Myocardial infarction, inferoposterior wall                        | 410.3  | I21.19 |
| Myocardial infarction, inferoposterior wall, initial care          | 410.31 | I21.19 |
| Myocardial infarction, inferior wall                               | 410.4  | I21.19 |
| Myocardial infarction, inferior wall, subsequent care              | 410.42 | I21.19 |

|                                                                |        |        |
|----------------------------------------------------------------|--------|--------|
| Myocardial infarction, inferolateral wall, subsequent care     | 410.22 | I21.19 |
| Myocardial infarction, inferoposterior wall, subsequent care   | 410.32 | I21.19 |
| Myocardial infarction, inferior, acute, initial episode        | 410.41 | I21.19 |
| Myocardial infarction, inferolateral, acute, initial episode   | 410.21 | I21.19 |
| Myocardial infarction, inferoposterior, acute, initial episode | 410.31 | I21.19 |
| Acute transmural myocardial infarction of inferolateral wall   | 410.21 | I21.19 |
| Transmural acute myocardial infarction of inferoposterior wall | 410.31 | I21.19 |
| Transmural acute inferoposterior myocardial infarction         | 410.31 | I21.19 |
| Inferolateral myocardial infarction                            | 410.2  | I21.19 |
| Myocardial infarction of inferolateral wall                    | 410.2  | I21.19 |
| Myocardial infarction of inferoposterior wall                  | 410.3  | I21.19 |
| Inferoposterior myocardial infarction                          | 410.3  | I21.19 |
| Acute inferoposterior myocardial infarction                    | 410.3  | I21.19 |
| Acute MI, inferolateral wall                                   | 410.2  | I21.19 |
| Acute MI, inferoposterior wall                                 | 410.3  | I21.19 |
| Acute MI, inferolateral wall, initial episode of care          | 410.21 | I21.19 |
| Acute MI, inferoposterior wall, initial episode of care        | 410.31 | I21.19 |
| Acute MI, inferolateral wall, subsequent episode of care       | 410.22 | I21.19 |
| Acute MI, inferoposterior wall, subsequent episode of care     | 410.32 | I21.19 |
| Acute MI, inferior wall                                        | 410.4  | I21.19 |
| Acute MI, inferior wall, initial episode of care               | 410.41 | I21.19 |

|                                                                                                |        |        |
|------------------------------------------------------------------------------------------------|--------|--------|
| Acute MI, inferior wall, subsequent episode of care                                            | 410.42 | I21.19 |
| Acute MI, other inferior wall                                                                  | 410.4  | I21.19 |
| Inferior myocardial infarction                                                                 | 410.4  | I21.19 |
| Complicated inferolateral myocardial infarction                                                | 410.2  | I21.19 |
| Inferolateral myocardial infarction with complication                                          | 410.2  | I21.19 |
| Transmural acute myocardial infarct inferior wall, initial hospitaliz                          | 410.41 | I21.19 |
| Acute myocardial infarction, of inferolateral wall, initial episode of care                    | 410.21 | I21.19 |
| Acute myocardial infarction, of inferolateral wall, subsequent episode of care                 | 410.22 | I21.19 |
| Acute myocardial infarction, of inferoposterior wall, subsequent episode of care               | 410.32 | I21.19 |
| Acute myocardial infarction of inferior wall, subsequent episode of care                       | 410.42 | I21.19 |
| AMI inferior wall                                                                              | 410.4  | I21.19 |
| AMI inferolateral wall                                                                         | 410.2  | I21.19 |
| ST elevation myocardial infarction (STEMI) of inferolateral wall, initial episode of care      | 410.21 | I21.19 |
| ST elevation myocardial infarction (STEMI) of inferolateral wall, subsequent episode of care   | 410.22 | I21.19 |
| ST elevation myocardial infarction (STEMI) of inferoposterior wall, initial episode of care    | 410.31 | I21.19 |
| ST elevation myocardial infarction (STEMI) of inferoposterior wall, subsequent episode of care | 410.32 | I21.19 |
| ST elevation myocardial infarction (STEMI) of inferior wall, initial episode of care           | 410.41 | I21.19 |

|                                                                                                                   |        |        |
|-------------------------------------------------------------------------------------------------------------------|--------|--------|
| ST elevation myocardial infarction (STEMI) of inferior wall, subsequent episode of care                           | 410.42 | I21.19 |
| ST elevation myocardial infarction (STEMI) of inferoposterior wall, episode of care unspecified                   | 410.3  | I21.19 |
| Transmural acute myocardial infarction of inferior wall, initial hospitalization                                  | 410.41 | I21.19 |
| Transmural acute inferior myocardial infarction, initial hospitalization                                          | 410.41 | I21.19 |
| Transmural myocardial infarction of inferolateral wall, initial hospitalization                                   | 410.21 | I21.19 |
| ST segment elevation myocardial infarction (STEMI) of inferolateral wall, subsequent episode of care              | 410.22 | I21.19 |
| ST segment elevation myocardial infarction (STEMI) of inferoposterior wall, subsequent episode of care            | 410.32 | I21.19 |
| Acute myocardial infarction of other inferior wall                                                                | 410.4  | I21.19 |
| Acute Q wave myocardial infarction of inferior wall                                                               | 410.4  | I21.19 |
| Acute Q wave myocardial infarction of inferolateral wall                                                          | 410.2  | I21.19 |
| Acute myocardial infarction of inferior wall, subsequent to initial episode of care                               | 410.42 | I21.19 |
| Acute myocardial infarction of inferolateral wall, subsequent to initial episode of care                          | 410.22 | I21.19 |
| Acute myocardial infarction of inferoposterior wall, subsequent to initial episode of care                        | 410.32 | I21.19 |
| ST segment elevation myocardial infarction (STEMI) of inferolateral wall, subsequent to initial episode of care   | 410.22 | I21.19 |
| ST segment elevation myocardial infarction (STEMI) of inferoposterior wall, subsequent to initial episode of care | 410.32 | I21.19 |

|                                                                                                   |        |        |
|---------------------------------------------------------------------------------------------------|--------|--------|
| ST-segment elevation myocardial infarction (STEMI) of inferior wall                               | 410.4  | I21.19 |
| Myocardial infarction of inferior wall                                                            | 410.4  | I21.19 |
| Inferior ST segment elevation                                                                     | 410.4  | I21.19 |
| Acute ST elevation myocardial infarction (STEMI) involving other coronary artery of inferior wall | 410.4  | I21.19 |
| ST elevation myocardial infarction (STEMI) involving other coronary artery of inferior wall       | 410.4  | I21.19 |
| Myocardial infarction involving other coronary artery of inferior wall                            | 410.4  | I21.19 |
| Acute myocardial infarction involving other coronary artery of inferior wall                      | 410.4  | I21.19 |
| Inferolateral AMI, initial episode                                                                | 410.21 | I21.19 |
| Inferoposterior AMI, episode                                                                      | 410.3  | I21.19 |
| Inferoposterior AMI, initial episode                                                              | 410.31 | I21.19 |
| Inferior AMI NEC, initial episode                                                                 | 410.41 | I21.19 |
| AMI inferolateral, subsequent                                                                     | 410.22 | I21.19 |
| AMI inferoposterior, subsequent                                                                   | 410.32 | I21.19 |
| AMI inferior wall, subsequent                                                                     | 410.42 | I21.19 |
| Acute myocardial infarction of other inferior wall, subsequent to initial episode of care         | 410.42 | I21.19 |
| ST elevation (STEMI) myocardial infarction involving other coronary artery of inferior wall       | 410.4  | I21.19 |
| Acute ST elevation myocardial infarction (STEMI) of inferior wall                                 | 410.4  | I21.19 |
| Acute ST elevation myocardial infarction (STEMI) of inferior wall involving right ventricle       | 410.4  | I21.19 |
| Acute myocardial infarction of inferior wall involving right ventricle                            | 410.4  | I21.19 |
| STEMI involving other coronary artery of inferior wall                                            | 410.4  | I21.19 |

|                                                                                                                  |        |        |
|------------------------------------------------------------------------------------------------------------------|--------|--------|
| ST elevation (STEMI) myocardial infarction involving other coronary artery of inferior wall                      |        | I21.19 |
| St elevation (STEMI) myocardial infarction of other sites                                                        |        | I21.2  |
| ST elevation myocardial infarction involving left circumflex coronary artery                                     | 410.81 | I21.21 |
| ST elevation myocardial infarction involving left circumflex coronary artery                                     | 410.81 | I21.21 |
| ST elevation myocardial infarction (STEMI) involving left circumflex coronary artery in recovery phase           | 410.82 | I21.21 |
| ST elevation myocardial infarction (STEMI) involving left circumflex coronary artery with complication           | 410.8  | I21.21 |
| Acute Q wave myocardial infarction involving left circumflex coronary artery                                     | 410.8  | I21.21 |
| Acute ST elevation myocardial infarction (STEMI) involving left circumflex coronary artery                       | 410.8  | I21.21 |
| Acute non-Q wave ST elevation myocardial infarction (STEMI) involving left circumflex coronary artery            | 410.8  | I21.21 |
| Widespread acute non-Q wave ST elevation myocardial infarction (STEMI) involving left circumflex coronary artery | 410.8  | I21.21 |
| Widespread acute Q wave ST elevation myocardial infarction (STEMI) involving left circumflex coronary artery     | 410.8  | I21.21 |
| Non-Q wave ST elevation myocardial infarction (STEMI) involving left circumflex coronary artery                  | 410.7  | I21.21 |
| Silent ST elevation myocardial infarction (STEMI) involving left circumflex coronary artery                      | 410.1  | I21.21 |
| Acute myocardial infarction involving left circumflex coronary artery                                            | 410.81 | I21.21 |

|                                                                                                                                      |        |        |
|--------------------------------------------------------------------------------------------------------------------------------------|--------|--------|
| Myocardial infarction involving left circumflex coronary artery                                                                      | 410.8  | I21.21 |
| Acute ST elevation myocardial infarction (STEMI) involving left circumflex coronary artery without development of Q waves            | 410.8  | I21.21 |
| Widespread acute ST elevation myocardial infarction (STEMI) involving left circumflex coronary artery without development of Q waves | 410.8  | I21.21 |
| ST elevation myocardial infarction (STEMI) involving left circumflex coronary artery without development of Q waves                  | 410.7  | I21.21 |
| ST elevation (STEMI) myocardial infarction involving left circumflex coronary artery                                                 | 410.81 | I21.21 |
| STEMI involving left circumflex coronary artery                                                                                      | 410.81 | I21.21 |
| ST elevation (STEMI) myocardial infarction involving left circumflex coronary artery                                                 |        | I21.21 |
| Acute myocardial infarction of other lateral wall, episode of care unspecified                                                       | 410.5  | I21.29 |
| Acute myocardial infarction of other lateral wall, initial episode of care                                                           | 410.51 | I21.29 |
| Acute myocardial infarction of other lateral wall, subsequent episode of care                                                        | 410.52 | I21.29 |
| Acute myocardial infarction, true posterior wall infarction, episode of care unspecified                                             | 410.6  | I21.29 |
| Acute myocardial infarction, true posterior wall infarction, initial episode of care                                                 | 410.61 | I21.29 |
| Acute myocardial infarction of other specified sites, episode of care unspecified                                                    | 410.8  | I21.29 |
| Acute myocardial infarction of other specified sites, initial episode of care                                                        | 410.81 | I21.29 |
| Acute myocardial infarction of other specified sites, subsequent episode of care                                                     | 410.82 | I21.29 |

|                                                                      |        |        |
|----------------------------------------------------------------------|--------|--------|
| Acute myocardial infarction of lateral wall                          | 410.5  | I21.29 |
| Acute myocardial infarction of apical-lateral wall                   | 410.5  | I21.29 |
| Acute myocardial infarction of basal-lateral wall                    | 410.5  | I21.29 |
| Acute myocardial infarction of high lateral wall                     | 410.5  | I21.29 |
| Acute myocardial infarction of posterolateral wall                   | 410.5  | I21.29 |
| True posterior wall infarction                                       | 410.6  | I21.29 |
| Acute myocardial infarction of posterobasal wall                     | 410.6  | I21.29 |
| Acute myocardial infarction of septum                                | 410.8  | I21.29 |
| Acute myocardial infarction of septum alone                          | 410.8  | I21.29 |
| True posterior wall infarction, initial episode of care              | 410.61 | I21.29 |
| True posterior wall infarction, subsequent episode of care           | 410.62 | I21.29 |
| Acute myocardial infarction, true posterior wall infarction          | 410.6  | I21.29 |
| Myocardial infarction (lateral wall)                                 | 410.5  | I21.29 |
| Acute myocardial infarction of lateral wall, initial episode of care | 410.51 | I21.29 |
| True posterior myocardial infarction                                 | 410.6  | I21.29 |
| Posterior MI                                                         | 410.6  | I21.29 |
| Acute MI lateral subsequent episode care                             | 410.52 | I21.29 |
| ST elevation myocardial infarction (STEMI) of lateral wall           | 410.5  | I21.29 |
| ST elevation myocardial infarction (STEMI) of true posterior wall    | 410.6  | I21.29 |
| True posterior infarct                                               | 410.6  | I21.29 |
| Basal-lateral infarction                                             | 410.5  | I21.29 |
| High lateral infarction                                              | 410.5  | I21.29 |
| Posterobasal infarction                                              | 410.6  | I21.29 |
| Posterolateral infarction                                            | 410.5  | I21.29 |
| Septal infarction                                                    | 410.8  | I21.29 |



|                                                             |        |        |
|-------------------------------------------------------------|--------|--------|
| AMI lateral wall                                            | 410.5  | I21.29 |
| Strictly posterior infarction                               | 410.6  | I21.29 |
| Acute lateral myocardial infarction                         | 410.5  | I21.29 |
| Acute posterior myocardial infarction                       | 410.6  | I21.29 |
| F/u of acute myocardial infarction of other specified sites | 410.82 | I21.29 |
| F/u of myocardial infarction of right ventricle             | 410.82 | I21.29 |
| Follow-up of myocardial infarction of right ventricle       | 410.82 | I21.29 |
| Myocardial infarction, lateral wall, initial care           | 410.51 | I21.29 |
| Myocardial infarction, lateral wall, subsequent care        | 410.52 | I21.29 |
| Myocardial infarction, true posterior wall, initial care    | 410.61 | I21.29 |
| Myocardial infarction, true posterior wall, subsequent care | 410.62 | I21.29 |
| Myocardial infarction, true posterior wall                  | 410.6  | I21.29 |
| Myocardial infarction, posterobasal                         | 410.6  | I21.29 |
| Myocardial infarction, septal, acute                        | 410.8  | I21.29 |
| Myocardial infarction, lateral wall, acute, initial episode | 410.51 | I21.29 |
| Myocardial infarction, posterior wall                       | 410.6  | I21.29 |
| Myocardial infarction, posterior wall, initial episode      | 410.61 | I21.29 |
| Apical myocardial infarction                                | 410.8  | I21.29 |
| Lateral myocardial infarction                               | 410.5  | I21.29 |
| Myocardial infarction of lateral wall                       | 410.5  | I21.29 |
| Acute MI, true posterior wall                               | 410.6  | I21.29 |
| Acute MI, lateral wall                                      | 410.5  | I21.29 |
| Acute MI, lateral wall, initial episode of care             | 410.51 | I21.29 |
| Acute MI, lateral wall, subsequent episode of care          | 410.52 | I21.29 |
| Acute MI, true posterior wall, initial episode of care      | 410.61 | I21.29 |

|                                                                                            |        |        |
|--------------------------------------------------------------------------------------------|--------|--------|
| Acute MI, true posterior wall, subsequent episode of care                                  | 410.62 | I21.29 |
| Myocardial infarction of septum                                                            | 410.8  | I21.29 |
| Septal myocardial infarction                                                               | 410.8  | I21.29 |
| Acute MI, other lateral wall, subsequent episode of care                                   | 410.52 | I21.29 |
| Acute MI, other specified site, initial episode of care                                    | 410.81 | I21.29 |
| Acute MI, other specified site, subsequent episode care                                    | 410.82 | I21.29 |
| Acute MI, other specified site                                                             | 410.8  | I21.29 |
| Acute MI, other lateral wall                                                               | 410.5  | I21.29 |
| Acute MI, other lateral wall, initial episode of care                                      | 410.51 | I21.29 |
| Myocardial infarction, apical                                                              | 410.8  | I21.29 |
| Acute septal myocardial infarction                                                         | 410.8  | I21.29 |
| Acute myocardial infarction of other sites, initial episode of care                        | 410.81 | I21.29 |
| Acute lateral wall myocardial infarction                                                   | 410.5  | I21.29 |
| Lateral wall myocardial infarction                                                         | 410.5  | I21.29 |
| Acute true posterior wall myocardial infarction                                            | 410.6  | I21.29 |
| Myocardial infarction of posterolateral wall                                               | 410.5  | I21.29 |
| Posterolateral myocardial infarction                                                       | 410.5  | I21.29 |
| Acute myocardial infarction of lateral wall, subsequent episode of care                    | 410.52 | I21.29 |
| ST elevation myocardial infarction (STEMI) of lateral wall, initial episode of care        | 410.51 | I21.29 |
| ST elevation myocardial infarction (STEMI) of lateral wall, subsequent episode of care     | 410.52 | I21.29 |
| ST elevation myocardial infarction (STEMI) of true posterior wall, initial episode of care | 410.61 | I21.29 |

|                                                                                               |        |        |
|-----------------------------------------------------------------------------------------------|--------|--------|
| ST elevation myocardial infarction (STEMI) of true posterior wall, subsequent episode of care | 410.62 | I21.29 |
| Transmural myocardial infarction of lateral wall, initial hospitalization                     | 410.51 | I21.29 |
| Mural thrombus of cardiac apex with acute MI                                                  | 410.8  | I21.29 |
| Mural thrombus of cardiac apex with acute myocardial infarction                               | 410.8  | I21.29 |
| Left ventricular apical thrombus with acute myocardial infarction                             | 410.8  | I21.29 |
| Left ventricular apical thrombus with acute MI                                                | 410.8  | I21.29 |
| Left ventricular mural thrombus with acute myocardial infarction                              | 410.8  | I21.29 |
| Left ventricular mural thrombus with acute MI                                                 | 410.8  | I21.29 |
| Left ventricular thrombosis with acute MI                                                     | 410.8  | I21.29 |
| Left ventricular thrombus with acute MI                                                       | 410.8  | I21.29 |
| Right ventricular mural thrombus with acute myocardial infarction                             | 410.8  | I21.29 |
| Thrombus of right ventricle with acute MI                                                     | 410.8  | I21.29 |
| Mural thrombus of left ventricle with acute MI                                                | 410.8  | I21.29 |
| Mural thrombus of left ventricular apex with acute MI                                         | 410.8  | I21.29 |
| Mural thrombus of right ventricle with acute MI                                               | 410.8  | I21.29 |
| Apical mural thrombus with acute MI                                                           | 410.8  | I21.29 |
| Right ventricular mural thrombus with acute MI                                                | 410.8  | I21.29 |
| RV (right ventricular) mural thrombus with acute MI                                           | 410.8  | I21.29 |
| Right ventricular thrombus with acute MI                                                      | 410.8  | I21.29 |
| LV (left ventricular) mural thrombus with acute MI                                            | 410.8  | I21.29 |

|                                                                                          |        |        |
|------------------------------------------------------------------------------------------|--------|--------|
| Ventricular mural thrombus with acute myocardial infarction                              | 410.8  | I21.29 |
| Ventricular mural thrombus with acute MI                                                 | 410.8  | I21.29 |
| Right ventricular apical thrombus with acute myocardial infarction                       | 410.8  | I21.29 |
| Mural thrombus of right ventricle apex with acute MI                                     | 410.8  | I21.29 |
| Right ventricular apical thrombus with acute MI                                          | 410.8  | I21.29 |
| Acute thrombus of left ventricle with acute MI                                           | 410.8  | I21.29 |
| Acute myocardial infarction of other lateral wall                                        | 410.5  | I21.29 |
| Acute myocardial infarction of other specified sites                                     | 410.8  | I21.29 |
| Acute Q wave myocardial infarction of lateral wall                                       | 410.5  | I21.29 |
| Acute myocardial infarction of lateral wall, subsequent to initial episode of care       | 410.52 | I21.29 |
| Acute myocardial infarction of other lateral wall, subsequent to initial episode of care | 410.52 | I21.29 |
| True posterior wall infarction, subsequent to initial episode of care                    | 410.62 | I21.29 |
| Myocardial infarction of true posterior wall                                             | 410.6  | I21.29 |
| Acute myocardial infarction involving other coronary artery                              | 410.8  | I21.29 |
| ST elevation myocardial infarction (STEMI) involving other coronary artery               | 410.1  | I21.29 |
| Acute ST elevation myocardial infarction (STEMI) involving other coronary artery         | 410.1  | I21.29 |
| Myocardial infarction involving other coronary artery                                    | 410.8  | I21.29 |
| Latrl AMI NEC, episod                                                                    | 410.5  | I21.29 |
| Latrl AMI NEC, init episod                                                               | 410.51 | I21.29 |
| Posterior AMI, episod                                                                    | 410.6  | I21.29 |

|                                                                                             |        |        |
|---------------------------------------------------------------------------------------------|--------|--------|
| Posterior AMI, init episod                                                                  | 410.61 | I21.29 |
| AMI NEC, initial episod                                                                     | 410.81 | I21.29 |
| AMI NEC, subsequent episod                                                                  | 410.82 | I21.29 |
| AMI lateral NEC, subseq                                                                     | 410.52 | I21.29 |
| True post infarct,subseq                                                                    | 410.62 | I21.29 |
| Acute myocardial infarction of other specified sites, subsequent to initial episode of care | 410.82 | I21.29 |
| Acute ST elevation myocardial infarction (STEMI) of septum                                  | 410.8  | I21.29 |
| Acute ST elevation myocardial infarction (STEMI) of posterior wall                          | 410.6  | I21.29 |
| Acute ST elevation myocardial infarction (STEMI) of posterobasal wall                       | 410.6  | I21.29 |
| Acute ST elevation myocardial infarction (STEMI) of posterolateral wall                     | 410.5  | I21.29 |
| Acute ST elevation myocardial infarction (STEMI) of lateral wall                            | 410.5  | I21.29 |
| Encounter for follow-up of myocardial infarction of right ventricle                         | 410.82 | I21.29 |
| ST elevation (STEMI) myocardial infarction involving other sites                            | 410.8  | I21.29 |
| ST elevation (STEMI) myocardial infarction involving other sites                            |        | I21.29 |
| Myocardial necrosis syndrome                                                                | 410.9  | I21.3  |
| Acute ST-segment elevation myocardial infarction                                            | 410.9  | I21.3  |
| ST elevation myocardial infarction (STEMI)                                                  | 410.9  | I21.3  |
| ST elevation myocardial infarction (STEMI), initial episode of care                         | 410.91 | I21.3  |
| ST elevation myocardial infarction (STEMI), subsequent episode of care                      | 410.92 | I21.3  |
| STEMI (ST elevation myocardial infarction)                                                  | 410.9  | I21.3  |
| Acute transmural myocardial infarction                                                      | 410.9  | I21.3  |
| Acute transmural MI                                                                         | 410.9  | I21.3  |

|                                                                                   |        |       |
|-----------------------------------------------------------------------------------|--------|-------|
| Acute ST-elevation myocardial infarction                                          | 410.9  | I21.3 |
| Myocardial necrosis                                                               | 410.9  | I21.3 |
| Acute ST segment elevation myocardial infarction                                  | 410.9  | I21.3 |
| ST elevation MI (STEMI)                                                           | 410.9  | I21.3 |
| ST elevation (STEMI) myocardial infarction                                        | 410.9  | I21.3 |
| Acute ST segment elevation MI                                                     | 410.9  | I21.3 |
| Transmural myocardial infarction, initial hospitalization                         | 410.91 | I21.3 |
| Widespread acute Q wave myocardial infarction                                     | 410.9  | I21.3 |
| Acute Q wave myocardial infarction                                                | 410.9  | I21.3 |
| ST elevation myocardial infarction (STEMI), subsequent to initial episode of care | 410.92 | I21.3 |
| Acute ST elevation myocardial infarction                                          | 410.9  | I21.3 |
| ST elevation myocardial infarction (STEMI) in recovery phase                      | 410.92 | I21.3 |
| ST elevation myocardial infarction (STEMI) with complication                      | 410.92 | I21.3 |
| Acute non-Q wave ST elevation myocardial infarction (STEMI)                       | 410.7  | I21.3 |
| Widespread acute non-Q wave ST elevation myocardial infarction (STEMI)            | 410.7  | I21.3 |
| Widespread acute Q wave ST elevation myocardial infarction (STEMI)                | 410.9  | I21.3 |
| Non-Q wave ST elevation myocardial infarction (STEMI)                             | 410.9  | I21.3 |
| Silent ST elevation myocardial infarction (STEMI)                                 | 410.9  | I21.3 |
| Acute ST elevation myocardial infarction (STEMI)                                  | 410.9  | I21.3 |
| Electrocardiogram suggestive of ST elevation myocardial infarction (STEMI)        | 410.9  | I21.3 |
| ST elevation myocardial infarction (STEMI), unspecified artery                    | 410.9  | I21.3 |

|                                                                                            |        |       |
|--------------------------------------------------------------------------------------------|--------|-------|
| Acute ST elevation myocardial infarction (STEMI), unspecified artery                       | 410.9  | I21.3 |
| Acute ST elevation myocardial infarction (STEMI) due to occlusion of left coronary artery  | 410.9  | I21.3 |
| Acute ST elevation myocardial infarction (STEMI) due to occlusion of right coronary artery | 410.9  | I21.3 |
| Electrocardiography suggestive of ST elevation myocardial infarction (STEMI)               | 410.9  | I21.3 |
| Acute ST elevation myocardial infarction (STEMI) without development of Q waves            | 410.7  | I21.3 |
| Widespread acute ST elevation myocardial infarction (STEMI) without development of Q waves | 410.7  | I21.3 |
| ST elevation myocardial infarction (STEMI) without development of Q waves                  | 410.9  | I21.3 |
| ST elevation (STEMI) myocardial infarction of unspecified site                             | 410.9  | I21.3 |
| ST elevation (STEMI) myocardial infarction of unspecified site                             |        | I21.3 |
| Acute myocardial infarction, subendocardial infarction, episode of care unspecified        | 410.7  | I21.4 |
| Acute myocardial infarction, subendocardial infarction, initial episode of care            | 410.71 | I21.4 |
| Acute myocardial infarction, subendocardial infarction, subsequent episode of care         | 410.72 | I21.4 |
| Acute subendocardial infarction                                                            | 410.7  | I21.4 |
| Acute nontransmural infarction                                                             | 410.7  | I21.4 |
| Subendocardial infarction                                                                  | 410.7  | I21.4 |
| Subendocardial infarction, initial episode of care                                         | 410.71 | I21.4 |
| Subendocardial infarction, subsequent episode of care                                      | 410.72 | I21.4 |

|                                                                       |        |       |
|-----------------------------------------------------------------------|--------|-------|
| Acute myocardial infarction, subendocardial infarction                | 410.7  | I21.4 |
| Subendocardial myocardial infarction                                  | 410.7  | I21.4 |
| SEMI (subendocardial myocardial infarction)                           | 410.7  | I21.4 |
| Non-Q wave myocardial infarction                                      | 410.7  | I21.4 |
| Subendocardial MI first episode care                                  | 410.71 | I21.4 |
| Subendocardial MI subsequent episode care                             | 410.72 | I21.4 |
| Acute non-ST-segment elevation myocardial infarction                  | 410.7  | I21.4 |
| Acute non-ST-elevation myocardial infarction                          | 410.7  | I21.4 |
| Non-ST elevation myocardial infarction (NSTEMI)                       | 410.7  | I21.4 |
| Subendocardial infarct                                                | 410.7  | I21.4 |
| Nontransmural infarction                                              | 410.7  | I21.4 |
| NSTEMI (non-ST elevation myocardial infarction)                       | 410.7  | I21.4 |
| NSTEMI (non-ST elevation myocardial infarction)                       | 410.7  | I21.4 |
| Non-ST elevation myocardial infarction (NSTEMI), initial care episode | 410.71 | I21.4 |
| Non-ST elevation myocardial infarction, subsequent care episode       | 410.72 | I21.4 |
| Acute non Q wave myocardial infarction                                | 410.7  | I21.4 |
| Acute non Q wave myocardial infarction, initial episode of care       | 410.71 | I21.4 |
| Acute non Q wave MI (myocardial infarction), initial episode of care  | 410.71 | I21.4 |
| F/u for non Q wave myocardial infarction                              | 410.72 | I21.4 |
| Follow-up for non Q wave myocardial infarction                        | 410.72 | I21.4 |
| Acute subendocardial infarction, initial episode of care              | 410.71 | I21.4 |
| Acute subendocardial infarction, subsequent episode of care           | 410.72 | I21.4 |



|                                                                    |         |       |
|--------------------------------------------------------------------|---------|-------|
| Acute subendocardial myocardial infarction of anterior wall        | 410.7   | I21.4 |
| Acute subendocardial myocardial infarction of inferior wall        | 410.7   | I21.4 |
| Non-STEMI (non-ST elevated myocardial infarction)                  | 410.7   | I21.4 |
| Non-ST elevated myocardial infarction (non-STEMI)                  | 410.7   | I21.4 |
| NSTEMI (non-ST elevated myocardial infarction)                     | 410.7   | I21.4 |
| Myocardial infarction, subendocardial                              | 410.7   | I21.4 |
| Myocardial infarction, subendocardial, subsequent care             | 410.72  | I21.4 |
| Acute non Q wave myocardial infarction, subsequent episode of care | 410.72  | I21.4 |
| Acute non Q wave MI (myocardial infarction), subsequent episode    | IMO0001 | I21.4 |
| Myocardial infarction, nontransmural                               | 410.7   | I21.4 |
| Myocardial infarction, subendocardial, initial episode             | 410.71  | I21.4 |
| Acute non-Q wave anterolateral myocardial infarction               | 410.7   | I21.4 |
| Acute non-Q wave myocardial infarction of anterolateral wall       | 410.7   | I21.4 |
| NSTEMI, initial episode of care                                    | 410.71  | I21.4 |
| Non-ST elevation myocardial infarction, initial hospitalization    | 410.71  | I21.4 |
| Non-Q wave myocardial infarction, initial hospitalization          | 410.71  | I21.4 |
| Non-Q wave myocardial infarction, initial episode of care          | 410.71  | I21.4 |
| Non-Q wave myocardial infarction, subsequent episode of care       | 410.72  | I21.4 |
| Nontransmural acute myocardial infarction of inferior wall         | 410.71  | I21.4 |
| Acute nontransmural inferior myocardial infarction                 | 410.71  | I21.4 |

|                                                                       |        |       |
|-----------------------------------------------------------------------|--------|-------|
| Nontransmural inferior myocardial infarction, initial hospitalization | 410.71 | I21.4 |
| Nontransmural myocardial infarction, initial hospitalization          | 410.71 | I21.4 |
| Acute non-Q wave infarction                                           | 410.7  | I21.4 |
| Acute non-ST segment elevation myocardial infarction                  | 410.7  | I21.4 |
| Acute MI, subendocardial                                              | 410.7  | I21.4 |
| Non-ST elevation MI (NSTEMI)                                          | 410.7  | I21.4 |
| Non-Q wave infarction                                                 | 410.7  | I21.4 |
| Acute MI, subendocardial, initial episode of care                     | 410.71 | I21.4 |
| Acute MI, subendocardial, subsequent episode of care                  | 410.72 | I21.4 |
| Non-ST elevation (NSTEMI) myocardial infarction                       | 410.7  | I21.4 |
| MI, acute, non ST segment elevation                                   | 410.7  | I21.4 |
| Acute subendocardial MI of anterior wall                              | 410.7  | I21.4 |
| Acute subendocardial MI of inferior wall                              | 410.7  | I21.4 |
| Non-Q wave myocardial infarction                                      | 410.7  | I21.4 |
| Non Q wave myocardial infarction                                      | 410.7  | I21.4 |
| Non-Q wave myocardial infarction of anterior wall                     | 410.7  | I21.4 |
| Non-Q wave myocardial infarction of true posterior wall               | 410.7  | I21.4 |
| Non-Q wave myocardial infarction of lateral wall                      | 410.7  | I21.4 |
| Non-Q wave myocardial infarction of inferoposterior wall              | 410.7  | I21.4 |
| Non-Q wave myocardial infarction of inferolateral wall                | 410.7  | I21.4 |
| Non-Q wave myocardial infarction of inferior wall                     | 410.7  | I21.4 |
| Non-Q wave myocardial infarction of anteroseptal wall                 | 410.7  | I21.4 |
| Non-Q wave myocardial infarction of anterolateral wall                | 410.7  | I21.4 |

|                                                                                                         |        |       |
|---------------------------------------------------------------------------------------------------------|--------|-------|
| Anterior subendocardial MI                                                                              | 410.7  | I21.4 |
| Nontransmural apical myocardial infarction, initial hospitalization                                     | 410.71 | I21.4 |
| Non-ST elevation myocardial infarction (NSTEMI), subendocardial infarction                              | 410.7  | I21.4 |
| Non-ST elevation myocardial infarction (NSTEMI), subendocardial infarction, episode of care unspecified | 410.7  | I21.4 |
| Non-ST elevation myocardial infarction (NSTEMI), subendocardial infarction, initial episode of care     | 410.71 | I21.4 |
| Non-ST elevation myocardial infarction (NSTEMI), subendocardial infarction, subsequent episode of care  | 410.72 | I21.4 |
| Non-ST elevation myocardial infarction (NSTEMI), initial episode of care                                | 410.71 | I21.4 |
| Non-ST elevation myocardial infarction (NSTEMI), subsequent episode of care                             | 410.72 | I21.4 |
| Nontransmural myocardial infarction of inferior wall, initial hospitalization                           | 410.71 | I21.4 |
| Nontransmural myocardial infarction of inferolateral wall, initial hospitalization                      | 410.71 | I21.4 |
| Nontransmural anteroapical myocardial infarction, initial hospitalization                               | 410.71 | I21.4 |
| Nontransmural anteroseptal myocardial infarction, initial hospitalization                               | 410.71 | I21.4 |
| Nontransmural myocardial infarction of lateral wall, initial hospitalization                            | 410.71 | I21.4 |
| Nontransmural myocardial infarction of anterolateral wall, initial hospitalization                      | 410.71 | I21.4 |
| Nontransmural acute myocardial infarction of lateral wall                                               | 410.71 | I21.4 |
| Acute nontransmural myocardial infarction of anterior wall                                              | 410.7  | I21.4 |
| Acute non-Q wave myocardial infarction of inferior wall                                                 | 410.7  | I21.4 |

|                                                                                           |        |       |
|-------------------------------------------------------------------------------------------|--------|-------|
| Acute non-Q wave myocardial infarction of lateral wall                                    | 410.7  | I21.4 |
| Widespread acute non-Q wave infarction                                                    | 410.7  | I21.4 |
| Acute non-Q wave myocardial infarction of inferolateral wall                              | 410.7  | I21.4 |
| Acute non Q wave myocardial infarction, subsequent to initial episode of care             | 410.72 | I21.4 |
| Acute subendocardial infarction, subsequent to initial episode of care                    | 410.72 | I21.4 |
| Non-Q wave myocardial infarction, subsequent to initial episode of care                   | 410.72 | I21.4 |
| Non-ST elevation subendocardial infarction, subsequent to initial episode of care         | 410.72 | I21.4 |
| Non-ST elevated myocardial infarction                                                     | 410.7  | I21.4 |
| Widespread acute non-Q wave myocardial infarction                                         | 410.7  | I21.4 |
| Widespread acute non-Q wave non-ST elevation myocardial infarction                        | 410.7  | I21.4 |
| Acute non-Q wave non-ST elevation myocardial infarction                                   | 410.7  | I21.4 |
| Non-Q wave non-ST elevation myocardial infarction                                         | 410.7  | I21.4 |
| Silent non-ST elevation myocardial infarction                                             | 410.9  | I21.4 |
| Recent subendocardial infarction                                                          | 410.7  | I21.4 |
| Subendo infrc, episod                                                                     | 410.7  | I21.4 |
| Subendo infrc, init episod                                                                | 410.71 | I21.4 |
| Subendo infarct, subseq                                                                   | 410.72 | I21.4 |
| Widespread acute non-Q wave non-ST elevation myocardial infarction (NSTEMI)               | 410.7  | I21.4 |
| Encounter for follow-up of non-Q wave myocardial infarction                               | 410.72 | I21.4 |
| Subsequent encounter to intial episode of care for acute non-Q wave myocardial infarction | 410.72 | I21.4 |

|                                                                                            |        |       |
|--------------------------------------------------------------------------------------------|--------|-------|
| Silent non-ST elevation myocardial infarction (NSTEMI)                                     | 410.9  | I21.4 |
| Acute non-Q wave non-ST elevation myocardial infarction (NSTEMI)                           | 410.7  | I21.4 |
| Non-Q wave non-ST elevation myocardial infarction (NSTEMI)                                 | 410.7  | I21.4 |
| Acute non-ST elevation myocardial infarction (NSTEMI)                                      | 410.7  | I21.4 |
| Nontransmural myocardial infarction                                                        | 410.7  | I21.4 |
| Subsequent encounter to initial episode of care for acute non-Q wave myocardial infarction | 410.72 | I21.4 |
| Non-ST elevation (NSTEMI) myocardial infarction                                            |        | I21.4 |
| Acute infarction of papillary muscle                                                       | 410.8  | I21.9 |
| Acute myocardial infarction of atrium                                                      | 410.8  | I21.9 |
| Acute papillary muscle infarction                                                          | 410.8  | I21.9 |
| Papillary muscle infarction                                                                | 410.8  | I21.9 |
| Atrial infarction                                                                          | 410.8  | I21.9 |
| Myocardial infarction, papillary muscle, acute                                             | 410.8  | I21.9 |
| Myocardial infarction, atrial, acute                                                       | 410.8  | I21.9 |
| AMI NEC, episod                                                                            | 410.9  | I21.9 |
| Acute myocardial infarction, unspecified site, episode of care unspecified                 | 410.9  | I21.9 |
| Acute myocardial infarction, unspecified site, initial episode of care                     | 410.91 | I21.9 |
| Acute myocardial infarction, unspecified site, subsequent episode of care                  | 410.92 | I21.9 |
| Cardiac infarction                                                                         | 410.9  | I21.9 |
| Acute myocardial infarction                                                                | 410.9  | I21.9 |
| Heart attack                                                                               | 410.9  | I21.9 |
| Myocardial infarct                                                                         | 410.9  | I21.9 |
| Myocardial infarction                                                                      | 410.9  | I21.9 |
| AMI (acute myocardial infarction)                                                          | 410.9  | I21.9 |
| Acute myocardial infarction, initial episode of care                                       | 410.91 | I21.9 |

|                                                                                       |        |       |
|---------------------------------------------------------------------------------------|--------|-------|
| Acute myocardial infarction, subsequent episode of care                               | 410.92 | I21.9 |
| Acute MI                                                                              | 410.9  | I21.9 |
| MI (myocardial infarction)                                                            | 410.9  | I21.9 |
| Myocardial infarction acute                                                           | 410.9  | I21.9 |
| Myocardial infarction syndrome                                                        | 410.9  | I21.9 |
| Acute myocardial infarction of right ventricle                                        | 410.8  | I21.9 |
| Myocardial infarction, initial care                                                   | 410.91 | I21.9 |
| Silent myocardial infarction                                                          | 410.9  | I21.9 |
| Myocardial infarction, silent                                                         | 410.9  | I21.9 |
| Demand myocardial infarction                                                          | 410.9  | I21.9 |
| Myocardial infarction, demand                                                         | 410.9  | I21.9 |
| Myocardial infarction, acute, care                                                    | 410.9  | I21.9 |
| Myocardial infarction, acute, initial episode of care                                 | 410.91 | I21.9 |
| Acute right ventricular myocardial infarction                                         | 410.8  | I21.9 |
| Acute MI, initial                                                                     | 410.91 | I21.9 |
| Acute MI, subsequent                                                                  | 410.92 | I21.9 |
| Acute myocardial infarction involving left coronary artery                            | 410.9  | I21.9 |
| Myocardial infarction within last four weeks                                          | 410.9  | I21.9 |
| Acute myocardial infarction of right ventricle, subsequent episode of care            | 410.92 | I21.9 |
| Acute myocardial infarction, unspecified site                                         | 410.9  | I21.9 |
| Myocardial infarction with complication                                               | 410.9  | I21.9 |
| Acute widespread myocardial infarction                                                | 410.9  | I21.9 |
| Myocardial infarction in recovery phase                                               | 410.92 | I21.9 |
| First myocardial infarction                                                           | 410.91 | I21.9 |
| Pain due to myocardial infarction                                                     | 410.9  | I21.9 |
| Acute myocardial infarction of right ventricle, subsequent to initial episode of care | 410.92 | I21.9 |

|                                                                                                    |               |              |
|----------------------------------------------------------------------------------------------------|---------------|--------------|
| Acute myocardial infarction, subsequent to initial episode of care                                 | 410.92        | I21.9        |
| Myocardial infarction during current hospitalization                                               | 410.9         | I21.9        |
| Death due to acute myocardial infarction                                                           | 410.9         | I21.9        |
| Admitted for acute myocardial infarction                                                           | 410.91        | I21.9        |
| AMI NOS, subsequent episod                                                                         | 410.92        | I21.9        |
| AMI NOS, unspecified                                                                               | 410.9         | I21.9        |
| Myocardial infarction less than 4 weeks ago                                                        | 410.9         | I21.9        |
| Subsequent encounter to initial episode of care for acute myocardial infarction of right ventricle | 410.92        | I21.9        |
| Occlusion of coronary artery with myocardial infarction                                            | 410.9         | I21.9        |
| Coronary artery occlusion with myocardial infarction                                               | 410.9         | I21.9        |
| Acute myocardial infarction, unspecified                                                           |               | I21.9        |
| Coronary artery rupture                                                                            | 410.9         | I21.9        |
| Ruptured, artery, coronary                                                                         | 410.9         | I21.9        |
| Ruptured, coronary artery                                                                          | 410.9         | I21.9        |
| Cardiovascular accident                                                                            | 429.2         | I21.9        |
| Cardiac necrosis                                                                                   | 410.9         | I21.9        |
| Mural thrombus of heart with acute myocardial infarction                                           | 410.9         | I21.9        |
| Mural thrombus of heart with acute MI                                                              | 410.9         | I21.9        |
| History of acute myocardial infarction within last month                                           | 410.9         | I21.9        |
| History of myocardial infarction within last month                                                 | 410.9         | I21.9        |
| Coronary artery thrombosis with myocardial infarction                                              | 410.9         | I21.9        |
| Acute myocardial infarction with rupture of free wall                                              | 410.9         | I21.9, I23.3 |
| Pericarditis secondary to acute myocardial infarction                                              | 410.90, 420.0 | I21.9, I32   |

|                                                                                                             |                |                 |
|-------------------------------------------------------------------------------------------------------------|----------------|-----------------|
| Drug-related myocardial necrosis syndrome                                                                   | 410.90, E947.9 | I21.9, T50.905A |
| Myocardial infarction with cardiac rehabilitation                                                           | 410.90, V57.89 | I21.9, Z51.89   |
| Other type of myocardial infarction                                                                         |                | I21.A           |
| Non-ST elevation myocardial infarction (NSTEMI) due to mismatch of myocardial oxygen supply and demand      | 410.7          | I21.A1          |
| Non-ST elevation myocardial infarction (NSTEMI), type 2                                                     | 410.7          | I21.A1          |
| Type 2 myocardial infarction                                                                                | 410.9          | I21.A1          |
| Myocardial infarction type 2                                                                                | 410.9          | I21.A1          |
| Myocardial infarction type 2                                                                                |                | I21.A1          |
| Other type of myocardial infarction                                                                         | 410.9          | I21.A9          |
| Other myocardial infarction type                                                                            | 410.9          | I21.A9          |
| Other myocardial infarction type                                                                            |                | I21.A9          |
| Subsequent ST elevation (STEMI) and non-ST elevation (NSTEMI) myocardial infarction                         |                | I22             |
| Additional acute myocardial infarction (anterior wall)                                                      | 410.1          | I22.0           |
| Subsequent ST elevation (STEMI) myocardial infarction of anterior wall                                      | 410.11         | I22.0           |
| Subsequent ST elevation (STEMI) myocardial infarction of anterior wall within 4 weeks of initial infarction | 410.1          | I22.0           |
| Subsequent ST elevation myocardial infarction (STEMI) of anterior wall within 4 weeks of initial infarction | 410.1          | I22.0           |
| Subsequent ST elevation (STEMI) myocardial infarction of anterior wall (CODE)                               | 410.11         | I22.0           |
| Subsequent ST elevation (STEMI) myocardial infarction of anterior wall                                      |                | I22.0           |
| Additional acute myocardial infarction (inferior wall)                                                      | 410.4          | I22.1           |
| Additional heart attack (inferior wall)                                                                     | 410.4          | I22.1           |



|                                                                                                                            |                |       |
|----------------------------------------------------------------------------------------------------------------------------|----------------|-------|
| Subsequent myocardial infarction of inferior wall                                                                          | 410.4          | I22.1 |
| Subsequent ST elevation (STEMI) myocardial infarction of inferior wall                                                     | 410.4          | I22.1 |
| Subsequent myocardial infarction of inferior wall within 4 weeks of initial infarction                                     | 410.4          | I22.1 |
| Subsequent ST elevation myocardial infarction (STEMI) involving right coronary artery within 4 weeks of initial infarction | 410.11, 410.92 | I22.1 |
| Subsequent ST elevation (STEMI) myocardial infarction of inferior wall (CODE)                                              | 410.4          | I22.1 |
| Subsequent ST elevation (STEMI) myocardial infarction of inferior wall                                                     |                | I22.1 |
| Acute non-ST-elevation MI following previous MI                                                                            | 410.7          | I22.2 |
| Subsequent non-ST elevation (NSTEMI) myocardial infarction                                                                 | 410.7          | I22.2 |
| Subsequent non-ST elevation (NSTEMI) myocardial infarction within 4 weeks of initial infarction                            | 410.7          | I22.2 |
| Subsequent non-ST elevation myocardial infarction within 4 weeks of initial infarction                                     | 410.7          | I22.2 |
| Subsequent non-ST elevation myocardial infarction (NSTEMI) within 4 weeks of initial infarction                            | 410.7          | I22.2 |
| Subsequent non-ST elevation (NSTEMI) myocardial infarction (CODE)                                                          | 410.7          | I22.2 |
| Subsequent non-ST elevation (NSTEMI) myocardial infarction                                                                 |                | I22.2 |
| Additional acute myocardial infarction (posterior wall)                                                                    | 410.6          | I22.8 |
| Additional heart attack (posterior wall)                                                                                   | 410.6          | I22.8 |
| Additional acute myocardial infarction (lateral wall)                                                                      | 410.5          | I22.8 |

|                                                                                                                                                     |                |       |
|-----------------------------------------------------------------------------------------------------------------------------------------------------|----------------|-------|
| Additional heart attack (lateral wall)                                                                                                              | 410.5          | I22.8 |
| Additional acute myocardial infarction (subendocardial)                                                                                             | 410.7          | I22.8 |
| Additional heart attack (subendocardial)                                                                                                            | 410.7          | I22.8 |
| Acute subendocardial infarction following prior myocardial infarction                                                                               | 410.7          | I22.8 |
| Subsequent ST elevation myocardial infarction (STEMI) involving left anterior descending (LAD) coronary artery within 4 weeks of initial infarction | 410.11, 410.92 | I22.8 |
| Subsequent ST elevation myocardial infarction (STEMI) involving left circumflex coronary artery within 4 weeks of initial infarction                | 410.81, 410.92 | I22.8 |
| Subsequent ST elevation myocardial infarction (STEMI) involving left main coronary artery within 4 weeks of initial infarction                      | 410.11, 410.92 | I22.8 |
| Subsequent ST elevation (STEMI) myocardial infarction of other sites                                                                                | 410.8          | I22.8 |
| Subsequent ST elevation (STEMI) myocardial infarction of other sites                                                                                |                | I22.8 |
| Subsequent ST elevation (STEMI) myocardial infarction                                                                                               | 410.9          | I22.9 |
| Subsequent ST elevation (STEMI) myocardial infarction of unspecified site                                                                           | 410.9          | I22.9 |
| Additional acute myocardial infarction                                                                                                              | 410.9          | I22.9 |
| Additional heart attack                                                                                                                             | 410.9          | I22.9 |
| Myocardial infarction, subsequent                                                                                                                   | 410.9          | I22.9 |
| Subsequent myocardial infarction                                                                                                                    | 410.9          | I22.9 |
| Subsequent myocardial infarction within 4 weeks of initial infarction                                                                               | 410.9          | I22.9 |
| Subsequent ST elevation myocardial infarction (STEMI) within 4 weeks of initial infarction                                                          | 410.9          | I22.9 |

|                                                                                                                                             |        |       |
|---------------------------------------------------------------------------------------------------------------------------------------------|--------|-------|
| Subsequent ST elevation (STEMI) myocardial infarction of unspecified site (CODE)                                                            | 410.92 | I22.9 |
| Subsequent ST elevation (STEMI) myocardial infarction of unspecified site                                                                   |        | I22.9 |
| Certain current complications following ST elevation (STEMI) and non-ST elevation (NSTEMI) myocardial infarction (within the 28 day period) |        | I23   |
| Hemopericardium as curr complication after acute myocardial infarction                                                                      | 429.79 | I23.0 |
| Hemopericardium as current complication following acute myocardial infarction                                                               | 429.79 | I23.0 |
| Hemopericardium as current complication following AMI                                                                                       | 429.79 | I23.0 |
| Hemopericardium as current complication following acute myocardial infarction                                                               |        | I23.0 |
| Atrial septal defect as curr complic after acute myocardial infarction                                                                      | 429.71 | I23.1 |
| Atrial septal defect as current complication following acute myocardial infarction                                                          | 429.71 | I23.1 |
| Atrial septal defect as current complication following AMI                                                                                  | 429.71 | I23.1 |
| Atrial septal defect as current complication following acute myocardial infarction                                                          |        | I23.1 |
| Ventric septal defect as curr complic after acute myocardial infarct                                                                        | 429.71 | I23.2 |
| Ventricular septal defect as current complication following acute myocardial infarction                                                     | 429.71 | I23.2 |
| Ventricular septal defect as current comp following AMI                                                                                     | 429.71 | I23.2 |
| Ventricular septal defect as current complication following acute myocardial infarction                                                     |        | I23.2 |

|                                                                                                               |               |       |
|---------------------------------------------------------------------------------------------------------------|---------------|-------|
| Rupture of heart                                                                                              | 410.9         | I23.3 |
| Cardiac rupture                                                                                               | 410.9         | I23.3 |
| Heart rupture                                                                                                 | 410.9         | I23.3 |
| Ruptured, cardiac                                                                                             | 410.9         | I23.3 |
| Ruptured, heart                                                                                               | 410.9         | I23.3 |
| Acute myocardial infarction with rupture of ventricle                                                         | 410.9         | I23.3 |
| Acute myocardial infarction with ventricular rupture                                                          | 410.9         | I23.3 |
| Free wall rupture                                                                                             | 410.9         | I23.3 |
| Acute ventricular septal rupture                                                                              | 410.8         | I23.3 |
| Rupture of interventricular septum                                                                            | 410.8         | I23.3 |
| Ventricular septal rupture, acute                                                                             | 410.8         | I23.3 |
| Ventricular septal rupture                                                                                    | 410.8         | I23.3 |
| Rupture of cardiac wall without hemopericardium as current complication following acute myocardial infarction | 429.79        | I23.3 |
| Rupture of card wall w/o hemoperic as current comp fol AMI                                                    | 429.79        | I23.3 |
| Rupture of cardiac wall without hemopericardium as current complication following acute myocardial infarction |               | I23.3 |
| Rupture of chordae tendineae as current complication following acute myocardial infarction                    | 429.5         | I23.4 |
| Rupture of chord tendne as current comp following AMI                                                         | 429.5         | I23.4 |
| Rupture of chordae tendineae as current complication following acute myocardial infarction                    |               | I23.4 |
| Ruptured papillary muscle complicating acute MI                                                               | 429.6, 410.90 | I23.5 |
| Rupture of papillary muscle as current complication following acute myocardial infarction                     | 429.6, 410.90 | I23.5 |
| Post-infarction mitral papillary muscle rupture                                                               | 429.6         | I23.5 |

|                                                                                           |                |       |
|-------------------------------------------------------------------------------------------|----------------|-------|
| Rupture of papillary muscle as current comp following AMI                                 | 429.6, 410.90  | I23.5 |
| Rupture of papillary muscle as current complication following acute myocardial infarction |                | I23.5 |
| LV (left ventricular) mural thrombus following MI                                         | 429.79, 410.82 | I23.6 |
| Left ventricular apical thrombus following myocardial infarction                          | 429.79, 410.82 | I23.6 |
| Left ventricular apical thrombus following MI                                             | 429.79, 410.82 | I23.6 |
| Left ventricular mural thrombus following MI                                              | 429.79, 410.82 | I23.6 |
| Left ventricular thrombosis following MI                                                  | 429.79, 410.82 | I23.6 |
| Left ventricular thrombus following MI                                                    | 429.79, 410.82 | I23.6 |
| Left ventricular mural thrombosis following myocardial infarction                         | 429.79, 410.82 | I23.6 |
| Mural thrombus of left ventricle following MI                                             | 429.79, 410.82 | I23.6 |
| Mural thrombus of left ventricular apex following MI                                      | 429.79, 410.82 | I23.6 |
| Acute thrombus of left ventricle following MI                                             | 429.79, 410.82 | I23.6 |
| Mural thrombus of left ventricle following acute myocardial infarction                    | 429.79, 410.82 | I23.6 |
| Ventricular thrombus following MI (myocardial infarction)                                 | 429.79, 410.92 | I23.6 |
| Post-infarction mural thrombus                                                            | 429.79, 410.92 | I23.6 |
| Mural thrombus of cardiac apex following myocardial infarction                            | 429.79, 410.92 | I23.6 |
| Mural thrombus of cardiac apex following MI                                               | 429.79, 410.92 | I23.6 |
| Right ventricular mural thrombosis following myocardial infarction                        | 429.79, 410.82 | I23.6 |
| Thrombus of right ventricle following MI                                                  | 429.79, 410.82 | I23.6 |
| Mural thrombus of right ventricle following MI                                            | 429.79, 410.82 | I23.6 |

|                                                                                                                                |                |       |
|--------------------------------------------------------------------------------------------------------------------------------|----------------|-------|
| Apical mural thrombus following MI                                                                                             | 429.79, 410.92 | I23.6 |
| Right ventricular mural thrombus following MI                                                                                  | 429.79, 410.82 | I23.6 |
| RV (right ventricular) mural thrombus following MI                                                                             | 429.79, 410.82 | I23.6 |
| Right ventricular thrombus following MI                                                                                        | 429.79, 410.82 | I23.6 |
| Ventricular mural thrombus following myocardial infarction                                                                     | 429.79, 410.92 | I23.6 |
| Ventricular mural thrombus following MI                                                                                        | 429.79, 410.92 | I23.6 |
| Mural thrombus of heart following myocardial infarction                                                                        | 429.79, 410.92 | I23.6 |
| Mural thrombus of heart following MI                                                                                           | 429.79, 410.92 | I23.6 |
| Right ventricular apical thrombus following myocardial infarction                                                              | 429.79, 410.82 | I23.6 |
| Mural thrombus of right ventricle apex following MI                                                                            | 429.79, 410.82 | I23.6 |
| Right ventricular apical thrombus following MI                                                                                 | 429.79, 410.82 | I23.6 |
| Post-infarction apical thrombus                                                                                                | 429.79         | I23.6 |
| Post-infarction thrombus of left ventricle                                                                                     | 429.79         | I23.6 |
| Post-infarction thrombus of right ventricle                                                                                    | 429.79         | I23.6 |
| Thrombosis of atrium, auricular appendage, and ventricle as current complications following acute myocardial infarction (CODE) | 429.79, 410.90 | I23.6 |
| Thrombosis of right atrium following myocardial infarction                                                                     | 429.79         | I23.6 |
| Thrombus of right atrial appendage following myocardial infarction                                                             | 429.79         | I23.6 |
| Thrombosis of left atrium following myocardial infarction                                                                      | 429.79         | I23.6 |
| Thrombus of left atrial appendage following myocardial infarction                                                              | 429.79         | I23.6 |
| Thrombosis of left atrial appendage following myocardial infarction                                                            | 429.79         | I23.6 |

|                                                                                                                         |                |              |
|-------------------------------------------------------------------------------------------------------------------------|----------------|--------------|
| Thrombosis of right atrial appendage following myocardial infarction                                                    | 429.79         | I23.6        |
| Thrombosis of atrium, auricular appendage, and ventricle as current complications following acute myocardial infarction |                | I23.6        |
| Atrial thrombus following MI                                                                                            | 429.79, 410.90 | I23.6, I21.3 |
| Thrombosis of atrium, auricular appendage, and ventricle as current complications following acute myocardial infarction | 429.79, 410.90 | I23.6, I21.3 |
| Atrial thrombus following myocardial infarction                                                                         | 429.79, 410.90 | I23.6, I21.3 |
| Thombos of atrium/auric append/ventr as current comp fol AMI                                                            | 429.79, 410.90 | I23.6, I21.3 |
| Post-infarction angina                                                                                                  | 429.79, 413.9  | I23.7        |
| Postinfarction angina                                                                                                   | 429.79, 413.9  | I23.7        |
| Postinfarction angina                                                                                                   |                | I23.7        |
| Other certain sequelae of myocardial infarction, not elsewhere classified                                               | 429.79         | I23.8        |
| Certain sequelae of myocardial infarction                                                                               | 429.79         | I23.8        |
| AMI sequelae                                                                                                            | 429.79         | I23.8        |
| Myocardial infarction sequelae                                                                                          | 429.79         | I23.8        |
| Myocardial infarction complications                                                                                     | 429.79         | I23.8        |
| Complications of myocardial infarction                                                                                  | 429.79         | I23.8        |
| Certain sequelae of myocardial infarction, not elsewhere classified                                                     | 429.79         | I23.8        |
| Sequelae of myocardial infarction                                                                                       | 429.79         | I23.8        |
| Complication of myocardial infarction                                                                                   | 429.79         | I23.8        |
| Other AMI sequelae                                                                                                      | 429.79         | I23.8        |
| Other current complications following acute myocardial infarction                                                       | 429.79         | I23.8        |
| Other current complications following acute myocardial infarction                                                       |                | I23.8        |
| Acute complication of myocardial infarction                                                                             | 429.79         | I23.8, I21.9 |
| Other acute ischemic heart diseases                                                                                     |                | I24          |

|                                                                              |        |       |
|------------------------------------------------------------------------------|--------|-------|
| Acute thrombus of right ventricle                                            | 410.9  | I24.0 |
| Coronary artery occlusion                                                    | 410.9  | I24.0 |
| Coronary artery thrombosis                                                   | 411.81 | I24.0 |
| Coronary thrombosis                                                          | 411.81 | I24.0 |
| Coronary occlusion                                                           | 410.9  | I24.0 |
| Coronary occlusion without myocardial infarction                             | 411.81 | I24.0 |
| CT (coronary thrombosis)                                                     | 411.81 | I24.0 |
| Thrombosis, arteries, coronary                                               | 411.81 | I24.0 |
| Acute coronary artery obstruction without myocardial infarction              | 411.81 | I24.0 |
| Acute coronary artery obstruction without MI                                 | 411.81 | I24.0 |
| Occlusion of left anterior descending artery                                 | 411.81 | I24.0 |
| Occlusion of LAD (left anterior descending) artery                           | 411.81 | I24.0 |
| Coronary thrombosis not resulting in myocardial infarction                   | 411.81 | I24.0 |
| Coronary occlusion, acute without myocardial infarct                         | 411.81 | I24.0 |
| Coronary artery clot                                                         | 411.81 | I24.0 |
| Occlusion of coronary artery, acute                                          | 410.9  | I24.0 |
| Acute coronary occlusion without myocardial infarction                       | 411.81 | I24.0 |
| Acute coronary thrombosis not resulting in myocardial infarction             | 411.81 | I24.0 |
| Blockage of coronary artery of heart                                         | 410.9  | I24.0 |
| Ischemic heart disease due to coronary artery obstruction                    | 411.81 | I24.0 |
| Left coronary artery occlusion                                               | 411.81 | I24.0 |
| Coronary artery occlusion without or not resulting in myocardial infarction  | 411.81 | I24.0 |
| Coronary artery thrombosis without or not resulting in myocardial infarction | 411.81 | I24.0 |
| Occlusion of coronary artery                                                 | 410.9  | I24.0 |
| Occlusion of coronary vein                                                   | 411.81 | I24.0 |



|                                                                                          |               |                |
|------------------------------------------------------------------------------------------|---------------|----------------|
| Occlusion of left anterior descending (LAD) artery                                       | 411.81        | I24.0          |
| Acute coronary thrombosis not resulting in myocardial infarction                         |               | I24.0          |
| Left main coronary artery thrombosis                                                     | 410.9         | I24.0          |
| Right main coronary artery thrombosis                                                    | 410.9         | I24.0          |
| Acute thrombus of left ventricle                                                         | 410.9         | I24.0          |
| Thrombosis of left circumflex coronary artery                                            | 410.9         | I24.0          |
| Left anterior descending coronary artery thrombosis                                      | 410.9         | I24.0          |
| Left anterior descending (LAD) coronary artery thrombosis                                | 410.9         | I24.0          |
| Occlusion of right coronary artery                                                       | 410.9         | I24.0          |
| RCA occlusion                                                                            | 410.9         | I24.0          |
| Right coronary artery occlusion                                                          | 410.9         | I24.0          |
| Postmyocardial infarction syndrome                                                       | 411           | I24.1          |
| Dressler's syndrome                                                                      | 411           | I24.1          |
| Postmyocardial infarction pericarditis                                                   | 411           | I24.1          |
| Dressler syndrome                                                                        | 411           | I24.1          |
| Myocardial postinfarction syndrome                                                       | 411           | I24.1          |
| Post MI syndrome                                                                         | 411           | I24.1          |
| Post myocardial infarction syndrome                                                      | 411           | I24.1          |
| Pericarditis; post-MI                                                                    | 411           | I24.1          |
| Post-cardiac injury syndrome                                                             | 411           | I24.1          |
| Post-MI pericarditis                                                                     | 411           | I24.1          |
| Postcardiac injury pericarditis                                                          | 411           | I24.1          |
| Post-infarction pericarditis                                                             | 411           | I24.1          |
| Dressler's syndrome                                                                      |               | I24.1          |
| Postmyocardial infarction syndrome following coronary artery bypass graft (CABG) surgery | 411.0, 414.04 | I24.1, I25.810 |
| Dressler's syndrome post-CABG                                                            | 411.0, 414.04 | I24.1, I25.810 |
| Dressler's syndrome following coronary artery bypass graft (CABG) surgery                | 411.0, 414.04 | I24.1, I25.810 |
| Other acute and subacute form of ischemic heart disease                                  | 411.89        | I24.8          |

|                                                          |        |       |
|----------------------------------------------------------|--------|-------|
| Subendocardial ischemia                                  | 411.89 | I24.8 |
| Microinfarct of heart                                    | 411.89 | I24.8 |
| Coronary insufficiency                                   | 411.89 | I24.8 |
| Microinfarct, heart                                      | 411.89 | I24.8 |
| Microinfarction of heart                                 | 411.89 | I24.8 |
| Coronary insufficiency, acute                            | 411.89 | I24.8 |
| Acute coronary insufficiency                             | 411.89 | I24.8 |
| Demand ischemia                                          | 411.89 | I24.8 |
| Acute and subacute ischemic heart disease                | 411.89 | I24.8 |
| Acute or subacute form of ischemic heart disease         | 411.89 | I24.8 |
| Coronary artery insufficiency                            | 411.89 | I24.8 |
| Insufficiency, arterial, coronary                        | 411.89 | I24.8 |
| Demand ischemia of myocardium                            | 411.89 | I24.8 |
| Other acute and subacute forms of ischemic heart disease | 411.89 | I24.8 |
| Other forms of acute ischemic heart disease              | 411.89 | I24.8 |
| Ischemia due to increased oxygen demand                  | 411.89 | I24.8 |
| Other forms of acute ischemic heart disease              |        | I24.8 |
| Acute coronary syndrome                                  | 411.1  | I24.9 |
| ACS (acute coronary syndrome)                            | 411.1  | I24.9 |
| Acute ischemic heart disease                             | 410.9  | I24.9 |
| Acute coronary syndromes                                 | 411.1  | I24.9 |
| Ischemic heart disease, acute                            | 410.9  | I24.9 |
| Coronary syndrome, acute                                 | 411.1  | I24.9 |
| Ischemia, myocardial, acute                              | 410.9  | I24.9 |
| Acute myocardial ischemia                                | 410.9  | I24.9 |
| Acute ischemic heart disease, unspecified                | 410.9  | I24.9 |
| Acute ischemic heart disease, unspecified                |        | I24.9 |
| Chronic ischemic heart disease                           |        | I25   |
| Atherosclerotic heart disease of native coronary artery  |        | I25.1 |

|                                                                         |              |        |
|-------------------------------------------------------------------------|--------------|--------|
| Coronary atherosclerosis of unspecified type of vessel, native or graft | 414          | I25.10 |
| Coronary atherosclerosis of native coronary artery                      | 414.01       | I25.10 |
| ASCVD (arteriosclerotic cardiovascular disease)                         | 429.2, 440.9 | I25.10 |
| Cardiovascular arteriosclerosis                                         | 429.2, 440.9 | I25.10 |
| Cardiovascular degeneration with arteriosclerosis                       | 429.2, 440.9 | I25.10 |
| Cardiovascular disease with arteriosclerosis                            | 429.2, 440.9 | I25.10 |
| Cardiovascular sclerosis with arteriosclerosis                          | 429.2, 440.9 | I25.10 |
| Coronary artery disease                                                 | 414          | I25.10 |
| ASHD (arteriosclerotic heart disease)                                   | 414          | I25.10 |
| Coronary sclerosis                                                      | 414          | I25.10 |
| Coronary arteriosclerosis                                               | 414          | I25.10 |
| Atherosclerotic heart disease                                           | 414          | I25.10 |
| Coronary artery atheroma                                                | 414          | I25.10 |
| Coronary stricture                                                      | 414          | I25.10 |
| Coronary atherosclerosis of native coronary vessel                      | 414.01       | I25.10 |
| Arteriosclerotic cardiovascular disease                                 | 429.2, 440.9 | I25.10 |
| Generalized arteriosclerosis                                            | 429.2, 440.9 | I25.10 |
| Generalized arteriosclerotic disease                                    | 429.2, 440.9 | I25.10 |
| Disease or syndrome of cardiovascular system                            | 429.2        | I25.10 |
| Atherosclerotic coronary vascular disease                               | 414          | I25.10 |
| Coronary disease                                                        | 414          | I25.10 |
| Coronary disorder                                                       | 414          | I25.10 |
| Coronary heart disease                                                  | 414          | I25.10 |
| Coronary atheroma                                                       | 414          | I25.10 |
| Coronary stenosis                                                       | 414          | I25.10 |
| CAD (coronary atherosclerotic disease)                                  | 414          | I25.10 |
| Arteriosclerotic cardiovascular disease (ASCVD)                         | 429.2, 440.9 | I25.10 |

|                                                                |              |        |
|----------------------------------------------------------------|--------------|--------|
| Cardiovascular degeneration (with mention of arteriosclerosis) | 429.2        | I25.10 |
| Cardiovascular disease (with mention of arteriosclerosis)      | 429.2        | I25.10 |
| Cardiovascular sclerosis (with mention of arteriosclerosis)    | 429.2, 440.9 | I25.10 |
| CAD (coronary artery disease)                                  | 414          | I25.10 |
| Coronary atherosclerosis                                       | 414          | I25.10 |
| Arteriosclerotic coronary artery disease                       | 414          | I25.10 |
| Arteriosclerotic heart disease                                 | 414          | I25.10 |
| Disease of the arteries of the heart                           | 414          | I25.10 |
| Clogged artery (heart)                                         | 414          | I25.10 |
| Hardening of the arteries of the heart                         | 414          | I25.10 |
| CAD (coronary artery disease), native coronary artery          | 414.01       | I25.10 |
| CHD (coronary heart disease)                                   | 414          | I25.10 |
| Coronary artery stricture                                      | 414          | I25.10 |
| Arteriosclerotic heart disease (ASHD)                          | 414          | I25.10 |
| Coronary artery arteriosclerosis                               | 414          | I25.10 |
| Coronary artery sclerosis                                      | 414          | I25.10 |
| Chronic coronary artery disease                                | 414          | I25.10 |
| Single vessel coronary artery disease                          | 414          | I25.10 |
| Coronary artery stenosis                                       | 414          | I25.10 |
| Plaque in heart artery                                         | 414          | I25.10 |
| Triple vessel coronary artery disease                          | 414          | I25.10 |
| Triple vessel disease of the heart                             | 414          | I25.10 |
| Non-occlusive coronary artery disease                          | 414          | I25.10 |
| Coronary artery disease, non-occlusive                         | 414          | I25.10 |
| Occlusive coronary artery disease                              | 414          | I25.10 |
| Coronary artery disease, occlusive                             | 414          | I25.10 |
| Non-occlusive coronary artery disease requiring drug therapy   | 414          | I25.10 |
| Occlusive coronary artery disease requiring drug therapy       | 414          | I25.10 |
| Arteriosclerosis of coronary artery                            | 414          | I25.10 |
| 3-vessel coronary artery disease                               | 414          | I25.10 |
| Single vessel coronary disease                                 | 414          | I25.10 |

|                                                                                 |                |        |
|---------------------------------------------------------------------------------|----------------|--------|
| Double vessel coronary artery disease                                           | 414            | I25.10 |
| Two-vessel coronary artery disease                                              | 414            | I25.10 |
| 2-vessel coronary artery disease                                                | 414            | I25.10 |
| 3-vessel CAD                                                                    | 414            | I25.10 |
| Coronary arteriosclerosis in native artery                                      | 414.01         | I25.10 |
| CAD in native artery                                                            | 414.01         | I25.10 |
| Multiple vessel coronary artery disease                                         | 414            | I25.10 |
| CAD, multiple vessel                                                            | 414            | I25.10 |
| Radiation-induced coronary artery disease                                       | 414.00, E926.9 | I25.10 |
| Stenosis of left anterior descending artery                                     | 414            | I25.10 |
| LAD stenosis                                                                    | 414            | I25.10 |
| Coronary ostial sclerosis                                                       | 414            | I25.10 |
| Coronary ostial stenosis                                                        | 414            | I25.10 |
| Coronary artery calcification seen on CAT scan                                  | 414            | I25.10 |
| Nonocclusive coronary atherosclerosis of native coronary artery                 | 414.01         | I25.10 |
| Atherosclerotic heart disease of native coronary artery without angina pectoris | 414.01         | I25.10 |
| Preclinical coronary artery disease                                             | 414            | I25.10 |
| Pre-clinical coronary artery disease                                            | 414            | I25.10 |
| Obliterative coronary artery disease                                            | 414            | I25.10 |
| Left main coronary artery disease                                               | 414            | I25.10 |
| Atherosclerosis of coronary artery                                              | 414            | I25.10 |
| Atherosclerosis of coronary artery without graft                                | 414            | I25.10 |
| Calcific coronary arteriosclerosis                                              | 414            | I25.10 |
| Atherosclerotic cardiovascular disease                                          | 429.2          | I25.10 |
| Atherosclerosis of native coronary artery without angina pectoris               | 414.01         | I25.10 |
| Coronary artery calcification seen on computed tomography                       | 414            | I25.10 |
| Coronary artery calcification seen on CT scan                                   | 414            | I25.10 |
| Coronary artery disease involving left main coronary artery                     | 414            | I25.10 |

|                                                                                                  |        |        |
|--------------------------------------------------------------------------------------------------|--------|--------|
| Atherosclerosis of coronary artery without history of bypass graft                               | 414    | I25.10 |
| Stricture of coronary artery                                                                     | 414    | I25.10 |
| Atherosclerosis of coronary artery without angina pectoris                                       | 414    | I25.10 |
| Coronary artery disease involving native coronary artery                                         | 414.01 | I25.10 |
| Coronary artery disease without angina pectoris                                                  | 414    | I25.10 |
| Coronary artery disease involving native coronary artery without angina pectoris                 | 414.01 | I25.10 |
| Hereditary cardiovascular system disorder                                                        | 429.2  | I25.10 |
| Mild CAD                                                                                         | 414    | I25.10 |
| Mild coronary artery disease                                                                     | 414    | I25.10 |
| Multi-vessel coronary artery stenosis                                                            | 414.01 | I25.10 |
| Stenosis of native coronary artery                                                               | 414.01 | I25.10 |
| Asymptomatic arteriosclerosis of coronary artery                                                 | 414.01 | I25.10 |
| Stenosis of left anterior descending (LAD) artery                                                | 414    | I25.10 |
| Atherosclerosis of native coronary artery                                                        | 414.01 | I25.10 |
| Atherosclerosis of native coronary artery of native heart                                        | 414.01 | I25.10 |
| Atherosclerosis of native coronary artery of native heart without angina pectoris                | 414.01 | I25.10 |
| Atherosclerosis of coronary artery of native heart                                               | 414.01 | I25.10 |
| Coronary artery disease involving native coronary artery of native heart                         | 414.01 | I25.10 |
| Coronary artery disease involving native coronary artery of native heart without angina pectoris | 414.01 | I25.10 |
| Atherosclerosis of coronary artery of native heart without angina pectoris                       | 414.01 | I25.10 |
| Coronary artery disease involving native heart without angina pectoris                           | 414.01 | I25.10 |

|                                                                                                                                                      |        |        |
|------------------------------------------------------------------------------------------------------------------------------------------------------|--------|--------|
| Coronary artery disease involving native heart                                                                                                       | 414.01 | I25.10 |
| Atherosclerosis of native coronary artery without angina pectoris, unspecified whether native or transplanted heart                                  | 414.01 | I25.10 |
| Cor athrscl-uns vessel                                                                                                                               | 414    | I25.10 |
| Coronary artery disease involving native coronary artery without angina pectoris, unspecified whether native or transplanted heart                   | 414.01 | I25.10 |
| Atherosclerosis of coronary artery, angina presence unspecified, unspecified vessel or lesion type, unspecified whether native or transplanted heart | 414    | I25.10 |
| Coronary artery disease involving native coronary artery, angina presence unspecified, unspecified whether native or transplanted heart              | 414.01 | I25.10 |
| Coronary artery disease without angina pectoris, unspecified vessel or lesion type, unspecified whether native or transplanted heart                 | 414    | I25.10 |
| Coronary artery disease, angina presence unspecified, unspecified vessel or lesion type, unspecified whether native or transplanted heart            | 414    | I25.10 |
| Atherosclerosis of coronary artery without angina pectoris, unspecified vessel or lesion type, unspecified whether native or transplanted heart      | 414    | I25.10 |
| Atherosclerosis of native coronary artery of native heart, angina presence unspecified                                                               | 414.01 | I25.10 |
| Coronary artery disease involving native heart, angina presence unspecified, unspecified vessel or lesion type                                       | 414.01 | I25.10 |

|                                                                                                                          |               |                |
|--------------------------------------------------------------------------------------------------------------------------|---------------|----------------|
| Atherosclerosis of coronary artery of native heart, angina presence unspecified, unspecified vessel or lesion type       | 414.01        | I25.10         |
| Atherosclerosis of native coronary artery, angina presence unspecified, unspecified whether native or transplanted heart | 414.01        | I25.10         |
| Coronary artery disease involving native coronary artery of native heart, angina presence unspecified                    | 414.01        | I25.10         |
| Atherosclerosis of coronary artery of native heart without angina pectoris, unspecified vessel or lesion type            | 414.01        | I25.10         |
| Coronary artery disease involving native heart without angina pectoris, unspecified vessel or lesion type                | 414.01        | I25.10         |
| Atheroscl heart disease of native coronary artery w/o ang pctrs                                                          | 414.01        | I25.10         |
| Atherosclerotic heart disease of native coronary artery without angina pectoris                                          |               | I25.10         |
| Nonobstructive atherosclerosis of coronary artery                                                                        | 414           | I25.10         |
| Coronary artery disease with hx of myocardial infarct w/o hx of CABG                                                     | 414.01, 412   | I25.10, I25.2  |
| Coronary artery disease with history of myocardial infarction without history of CABG                                    | 414.01, 412   | I25.10, I25.2  |
| Arteriosclerosis of coronary artery in patient with history of myocardial infarction                                     | 414.00, 412   | I25.10, I25.2  |
| Coronary arteriosclerosis in patient with history of previous myocardial infarction                                      | 414.00, 412   | I25.10, I25.2  |
| Chronic total occlusion of native coronary artery                                                                        | 414.01, 414.2 | I25.10, I25.82 |
| Coronary atherosclerosis due to lipid rich plaque                                                                        | 414.3         | I25.10, I25.83 |
| Coronary arteriosclerosis due to lipid rich plaque                                                                       | 414.3         | I25.10, I25.83 |



|                                                                                          |                |                        |
|------------------------------------------------------------------------------------------|----------------|------------------------|
| Coronary artery disease due to lipid rich plaque                                         | 414.00, 414.3  | I25.10, I25.83         |
| Coronary artery calcinosis                                                               | 414.00, 414.4  | I25.10, I25.84         |
| Calcification of native coronary artery                                                  | 414.01, 414.4  | I25.10, I25.84         |
| Coronary atherosclerosis due to calcified coronary lesion                                | 414.00, 414.4  | I25.10, I25.84         |
| Coronary atherosclerosis due to calcified coronary lesion of native artery               | 414.00, 414.4  | I25.10, I25.84         |
| Coronary artery calcification                                                            | 414.00, 414.4  | I25.10, I25.84         |
| Coronary artery calcification of native artery                                           | 414.01, 414.4  | I25.10, I25.84         |
| Calcification of coronary artery                                                         | 414.00, 414.4  | I25.10, I25.84         |
| Coronary artery disease due to calcified coronary lesion                                 | 414.00, 414.4  | I25.10, I25.84         |
| Atherosclerotic cardiovascular disease (ASCVD) involving retina                          | 440.8, 362.13  | I25.10, I70.8, H35.019 |
| Presence of stent in coronary artery in patient with coronary artery disease             | 414.01, V45.82 | I25.10, Z95.5          |
| Recurrent coronary arteriosclerosis following PTCA                                       | 414.01, V45.82 | I25.10, Z98.61         |
| CAD S/P percutaneous coronary angioplasty                                                | 414.01, V45.82 | I25.10, Z98.61         |
| Recurrent coronary arteriosclerosis after percutaneous transluminal coronary angioplasty | 414.01, V45.82 | I25.10, Z98.61         |
| Coronary arteriosclerosis after percutaneous transluminal coronary angioplasty (PTCA)    | 414.00, V45.89 | I25.10, Z98.61         |
| Atherosclerotic heart disease of native coronary artery with angina pectoris             |                | I25.11                 |
| Atherosclerotic heart disease of native coronary artery with unstable angina pectoris    | 414.01, 411.1  | I25.110                |
| Atherosclerosis of native coronary artery with unstable angina pectoris                  | 414.01, 411.1  | I25.110                |
| Atherosclerosis of coronary artery with unstable angina pectoris                         | 414.00, 411.1  | I25.110                |

|                                                                                                                                                       |               |         |
|-------------------------------------------------------------------------------------------------------------------------------------------------------|---------------|---------|
| Coronary artery disease involving native coronary artery with unstable angina pectoris                                                                | 414.01, 411.1 | I25.110 |
| Coronary artery disease with unstable angina pectoris                                                                                                 | 414.00, 411.1 | I25.110 |
| Atherosclerosis of native coronary artery of native heart with unstable angina pectoris                                                               | 414.01, 411.1 | I25.110 |
| Coronary artery disease involving native coronary artery of native heart with unstable angina pectoris                                                | 414.01, 411.1 | I25.110 |
| Atherosclerosis of coronary artery of native heart with unstable angina pectoris                                                                      | 414.01, 411.1 | I25.110 |
| Coronary artery disease involving native heart with unstable angina pectoris                                                                          | 414.01, 413.9 | I25.110 |
| Atherosclerosis of native coronary artery with unstable angina pectoris, unspecified whether native or transplanted heart                             | 414.01, 411.1 | I25.110 |
| Coronary artery disease involving native coronary artery with unstable angina pectoris, unspecified whether native or transplanted heart              | 414.01, 411.1 | I25.110 |
| Atherosclerosis of coronary artery of native heart with unstable angina pectoris, unspecified vessel or lesion type                                   | 414.01, 411.1 | I25.110 |
| Coronary artery disease with unstable angina pectoris, unspecified vessel or lesion type, unspecified whether native or transplanted heart            | 414.00, 411.1 | I25.110 |
| Atherosclerosis of coronary artery with unstable angina pectoris, unspecified vessel or lesion type, unspecified whether native or transplanted heart | 414.00, 411.1 | I25.110 |
| Coronary artery disease involving native heart with unstable angina pectoris, unspecified vessel or lesion type                                       | 414.01, 413.9 | I25.110 |

|                                                                                                                                        |               |         |
|----------------------------------------------------------------------------------------------------------------------------------------|---------------|---------|
| Unstable angina pectoris due to coronary arteriosclerosis                                                                              | 411.1, 414.01 | I25.110 |
| Athsc heart disease of native cor art w unstable ang pctrs                                                                             | 414.01, 411.1 | I25.110 |
| Atherosclerotic heart disease of native coronary artery with unstable angina pectoris                                                  |               | I25.110 |
| Atherosclerotic heart disease of native coronary artery with angina pectoris with documented spasm                                     | 414.01, 413.9 | I25.111 |
| Atherosclerosis of native coronary artery with angina pectoris with documented spasm                                                   | 414.01, 413.9 | I25.111 |
| Atherosclerosis of coronary artery with angina pectoris and documented spasm                                                           | 414.00, 413.9 | I25.111 |
| Coronary artery disease with angina pectoris with documented spasm                                                                     | 414.00, 413.9 | I25.111 |
| Coronary artery disease involving native coronary artery with angina pectoris with documented spasm                                    | 414.01, 413.9 | I25.111 |
| Atherosclerosis of native coronary artery of native heart with angina pectoris with documented spasm                                   | 414.01, 413.9 | I25.111 |
| Coronary artery disease involving native coronary artery of native heart with angina pectoris with documented spasm                    | 414.01, 413.9 | I25.111 |
| Coronary artery disease involving native heart with angina pectoris and documented spasm                                               | 414.01, 413.9 | I25.111 |
| Atherosclerosis of coronary artery of native heart with angina pectoris and documented spasm                                           | 414.01, 413.9 | I25.111 |
| Atherosclerosis of native coronary artery with angina pectoris with documented spasm, unspecified whether native or transplanted heart | 414.01, 413.9 | I25.111 |

|                                                                                                                                                                   |               |         |
|-------------------------------------------------------------------------------------------------------------------------------------------------------------------|---------------|---------|
| Coronary artery disease involving native coronary artery with angina pectoris with documented spasm, unspecified whether native or transplanted heart             | 414.01, 413.9 | I25.111 |
| Coronary artery disease involving native heart with angina pectoris and documented spasm, unspecified vessel or lesion type                                       | 414.01, 413.9 | I25.111 |
| Atherosclerosis of coronary artery of native heart with angina pectoris and documented spasm, unspecified vessel or lesion type                                   | 414.01, 413.9 | I25.111 |
| Atherosclerosis of coronary artery with angina pectoris and documented spasm, unspecified vessel or lesion type, unspecified whether native or transplanted heart | 414.00, 413.9 | I25.111 |
| Coronary artery disease with angina pectoris with documented spasm, unspecified vessel or lesion type, unspecified whether native or transplanted heart           | 414.00, 413.9 | I25.111 |
| Athsc heart disease of native cor art w ang pctrs w spasm                                                                                                         | 414.01, 413.9 | I25.111 |
| Atherosclerotic heart disease of native coronary artery with angina pectoris with documented spasm                                                                |               | I25.111 |
| Athsc heart disease of native cor art w oth ang pctrs                                                                                                             | 414.01, 413.9 | I25.118 |
| Coronary artery disease with other forms of angina pectoris                                                                                                       | 414.00, 413.9 | I25.118 |
| Coronary artery disease involving native coronary artery with other forms of angina pectoris                                                                      | 414.01, 413.9 | I25.118 |
| Atherosclerosis of native coronary artery with other form of angina pectoris                                                                                      | 414.01, 413.9 | I25.118 |

|                                                                                                                                |               |         |
|--------------------------------------------------------------------------------------------------------------------------------|---------------|---------|
| Atherosclerosis of native coronary artery of native heart with other form of angina pectoris                                   | 414.01, 413.9 | I25.118 |
| Coronary artery disease involving native coronary artery of native heart with other form of angina pectoris                    | 414.01, 413.9 | I25.118 |
| Atherosclerosis of coronary artery of native heart with other form of angina pectoris                                          | 414.01, 413.9 | I25.118 |
| Coronary artery disease involving native heart with other form of angina pectoris                                              | 414.01, 413.9 | I25.118 |
| Atherosclerosis of coronary artery with other form of angina pectoris                                                          | 414.00, 413.9 | I25.118 |
| Atherosclerosis of native coronary artery with other form of angina pectoris, unspecified whether native or transplanted heart | 414.01, 413.9 | I25.118 |
| Coronary artery disease with stable angina pectoris                                                                            | 414.00, 413.9 | I25.118 |
| Atherosclerosis of coronary artery of native heart with stable angina pectoris                                                 | 414.01, 413.9 | I25.118 |
| Atherosclerosis of coronary artery with stable angina pectoris                                                                 | 414.00, 413.9 | I25.118 |
| Coronary artery disease of native artery with stable angina pectoris                                                           | 414.01, 413.9 | I25.118 |
| Coronary artery disease of native heart with stable angina pectoris                                                            | 414.01, 413.9 | I25.118 |
| Atherosclerosis of native coronary artery with stable angina pectoris                                                          | 414.01, 413.9 | I25.118 |
| Coronary artery disease of native artery of native heart with stable angina pectoris                                           | 414.01, 413.9 | I25.118 |
| Atherosclerosis of native coronary artery of native heart with stable angina pectoris                                          | 414.01, 413.9 | I25.118 |
| Atherosclerotic heart disease of native coronary artery with other forms of angina pectoris                                    | 414.01, 413.9 | I25.118 |

|                                                                                                                                                            |               |         |
|------------------------------------------------------------------------------------------------------------------------------------------------------------|---------------|---------|
| Coronary artery disease with other form of angina pectoris                                                                                                 | 414.00, 413.9 | I25.118 |
| Atherosclerosis of coronary artery of native heart with stable angina pectoris, unspecified vessel or lesion type                                          | 414.01, 413.9 | I25.118 |
| Coronary artery disease with stable angina pectoris, unspecified vessel or lesion type, unspecified whether native or transplanted heart                   | 414.00, 413.9 | I25.118 |
| Coronary artery disease of native heart with stable angina pectoris, unspecified vessel or lesion type                                                     | 414.01, 413.9 | I25.118 |
| Coronary artery disease of native artery with stable angina pectoris, unspecified whether native or transplanted heart                                     | 414.01, 413.9 | I25.118 |
| Atherosclerosis of native coronary artery with stable angina pectoris, unspecified whether native or transplanted heart                                    | 414.01, 413.9 | I25.118 |
| Atherosclerosis of coronary artery with stable angina pectoris, unspecified vessel or lesion type, unspecified whether native or transplanted heart        | 414.00, 413.9 | I25.118 |
| Coronary artery disease involving native coronary artery with other form of angina pectoris, unspecified whether native or transplanted heart              | 414.01, 413.9 | I25.118 |
| Atherosclerosis of coronary artery of native heart with other form of angina pectoris, unspecified vessel or lesion type                                   | 414.01, 413.9 | I25.118 |
| Atherosclerosis of coronary artery with other form of angina pectoris, unspecified vessel or lesion type, unspecified whether native or transplanted heart | 414.00, 413.9 | I25.118 |
| Coronary artery disease with other form of angina pectoris, unspecified vessel or lesion type, unspecified whether native or transplanted heart            | 414.00, 413.9 | I25.118 |

|                                                                                                                                                |               |         |
|------------------------------------------------------------------------------------------------------------------------------------------------|---------------|---------|
| Coronary artery disease involving native heart with other form of angina pectoris, unspecified vessel or lesion type                           | 414.01, 413.9 | I25.118 |
| Coronary artery disease with exertional angina                                                                                                 | 414.00, 413.9 | I25.118 |
| Coronary artery disease involving native coronary artery with other forms of angina pectoris, unspecified whether native or transplanted heart | 414.01, 413.9 | I25.118 |
| Atherosclerotic heart disease of native coronary artery with other forms of angina pectoris                                                    |               | I25.118 |
| Atherosclerotic heart disease native coronary artery w/angina pectoris                                                                         | 414.01, 413.9 | I25.119 |
| Atherosclerotic heart disease of native coronary artery with angina pectoris                                                                   | 414.01, 413.9 | I25.119 |
| Atherosclerosis of native coronary artery with angina pectoris                                                                                 | 414.01, 413.9 | I25.119 |
| Coronary artery disease involving native coronary artery with angina pectoris                                                                  | 414.01, 413.9 | I25.119 |
| Atherosclerosis of native coronary artery of native heart with angina pectoris                                                                 | 414.01, 413.9 | I25.119 |
| Coronary artery disease involving native coronary artery of native heart with angina pectoris                                                  | 414.01, 413.9 | I25.119 |
| Atherosclerosis of coronary artery of native heart with angina pectoris                                                                        | 414.01, 413.9 | I25.119 |
| Atherosclerosis of coronary artery with angina pectoris                                                                                        | 414.00, 413.9 | I25.119 |
| Coronary artery disease involving native heart with angina pectoris                                                                            | 414.01, 413.9 | I25.119 |
| Coronary artery disease with unspecified angina pectoris                                                                                       | 414.00, 413.9 | I25.119 |
| Atherosclerosis of native coronary artery with angina pectoris, unspecified whether native or transplanted heart                               | 414.01, 413.9 | I25.119 |

|                                                                                                                                              |               |         |
|----------------------------------------------------------------------------------------------------------------------------------------------|---------------|---------|
| Coronary artery disease with angina pectoris                                                                                                 | 414.00, 413.9 | I25.119 |
| Atherosclerotic heart disease of native coronary artery with unspecified angina pectoris                                                     | 414.01, 413.9 | I25.119 |
| Coronary artery disease involving native coronary artery with angina pectoris, unspecified whether native or transplanted heart              | 414.01, 413.9 | I25.119 |
| Coronary artery disease with angina pectoris, unspecified vessel or lesion type, unspecified whether native or transplanted heart            | 414.00, 413.9 | I25.119 |
| Coronary artery disease involving native heart with angina pectoris, unspecified vessel or lesion type                                       | 414.01, 413.9 | I25.119 |
| Atherosclerosis of coronary artery with angina pectoris, unspecified vessel or lesion type, unspecified whether native or transplanted heart | 414.00, 413.9 | I25.119 |
| Atherosclerosis of coronary artery of native heart with angina pectoris, unspecified vessel or lesion type                                   | 414.01, 413.9 | I25.119 |
| Angina concurrent with and due to arteriosclerosis of coronary artery                                                                        | 413.9, 414.01 | I25.119 |
| Athsc heart disease of native cor art w unsp ang pctrs                                                                                       | 414.01, 413.9 | I25.119 |
| Atherosclerotic heart disease of native coronary artery with unspecified angina pectoris                                                     |               | I25.119 |
| Old myocardial infarction                                                                                                                    | 412           | I25.2   |
| Scarring of papillary muscle                                                                                                                 | 429.81        | I25.2   |
| Healed myocardial infarction                                                                                                                 | 412           | I25.2   |
| Papillary muscle scarring                                                                                                                    | 429.81        | I25.2   |
| Healed myocardial infarct                                                                                                                    | 412           | I25.2   |
| Past heart attack                                                                                                                            | 412           | I25.2   |
| Past myocardial infarction                                                                                                                   | 412           | I25.2   |



|                                                                        |        |       |
|------------------------------------------------------------------------|--------|-------|
| Old myocardial infarct                                                 | 412    | I25.2 |
| ECG: old myocardial infarction                                         | 412    | I25.2 |
| Healed coronary                                                        | 412    | I25.2 |
| Scar, papillary muscle                                                 | 429.81 | I25.2 |
| Scarring, papillary muscle                                             | 429.81 | I25.2 |
| Old MI (myocardial infarction)                                         | 412    | I25.2 |
| Personal history of MI (myocardial infarction)                         | 412    | I25.2 |
| Myocardial infarction with symptoms after 8 weeks from infarction date | 414.8  | I25.2 |
| Past myocardial infarction ECG/special investigatn diagnos, no symptom | 412    | I25.2 |
| Asymptomatic old MI (myocardial infarction)                            | 412    | I25.2 |
| Myocardial infarct, old                                                | 412    | I25.2 |
| Past history of myocardial infarction                                  | 412    | I25.2 |
| History of heart attack                                                | 412    | I25.2 |
| History of MI (myocardial infarction)                                  | 412    | I25.2 |
| Myocardial infarction, old                                             | 412    | I25.2 |
| Apical myocardial infarction greater than eight weeks ago              | 412    | I25.2 |
| History of myocardial infarction, greater than 8 weeks                 | 412    | I25.2 |
| Myocardial infarction of anterior wall greater than eight weeks ago    | 412    | I25.2 |
| Anterior myocardial infarction greater than eight weeks ago            | 412    | I25.2 |
| Anterolateral myocardial infarction greater than eight weeks ago       | 412    | I25.2 |
| Old myocardial infarction of inferior wall, greater than 8 weeks       | 412    | I25.2 |
| Previous inferior myocardial infarction older than 8 weeks             | 412    | I25.2 |
| Old myocardial infarction, greater than 8 weeks                        | 412    | I25.2 |
| Previous myocardial infarction older than 8 weeks                      | 412    | I25.2 |

|                                                              |     |       |
|--------------------------------------------------------------|-----|-------|
| Old non-Q wave myocardial infarction                         | 412 | I25.2 |
| Old non-ST elevation myocardial infarction (NSTEMI)          | 412 | I25.2 |
| Asymptomatic old myocardial infarction                       | 412 | I25.2 |
| History of myocardial infarction                             | 412 | I25.2 |
| History of acute myocardial infarction of septum             | 412 | I25.2 |
| History of acute myocardial infarction of anterior wall      | 412 | I25.2 |
| History of acute myocardial infarction of anterolateral wall | 412 | I25.2 |
| History of acute myocardial infarction of lateral wall       | 412 | I25.2 |
| History of acute myocardial infarction                       | 412 | I25.2 |
| History of acute myocardial infarction of inferior wall      | 412 | I25.2 |
| History of acute anterior wall myocardial infarction         | 412 | I25.2 |
| History of acute inferior wall myocardial infarction         | 412 | I25.2 |
| History of acute lateral wall myocardial infarction          | 412 | I25.2 |
| History of acute anterior wall MI                            | 412 | I25.2 |
| History of acute anterolateral myocardial infarction         | 412 | I25.2 |
| History of acute anterolateral wall MI                       | 412 | I25.2 |
| History of acute inferior wall MI                            | 412 | I25.2 |
| History of acute lateral wall MI                             | 412 | I25.2 |
| MI, old                                                      | 412 | I25.2 |
| History of ST elevation myocardial infarction                | 412 | I25.2 |
| History of non-ST elevation myocardial infarction (NSTEMI)   | 412 | I25.2 |
| History of ST elevation myocardial infarction (STEMI)        | 412 | I25.2 |
| Hx of myocardial infarction                                  | 412 | I25.2 |
| H/O ST elevation myocardial infarction                       | 412 | I25.2 |

|                                                                    |     |       |
|--------------------------------------------------------------------|-----|-------|
| Hx of ST elevation myocardial infarction                           | 412 | I25.2 |
| Hx of non-ST elevation myocardial infarction (NSTEMI)              | 412 | I25.2 |
| H/O non-ST elevation myocardial infarction (NSTEMI)                | 412 | I25.2 |
| Hx of myocardial infarction of inferior wall, greater than 8 weeks | 412 | I25.2 |
| H/O myocardial infarction of inferior wall, greater than 8 weeks   | 412 | I25.2 |
| H/O myocardial infarction, greater than 8 weeks                    | 412 | I25.2 |
| Hx of myocardial infarction, greater than 8 weeks                  | 412 | I25.2 |
| Hx of acute myocardial infarction of anterolateral wall            | 412 | I25.2 |
| H/O acute myocardial infarction of anterolateral wall              | 412 | I25.2 |
| Hx of acute myocardial infarction of anterior wall                 | 412 | I25.2 |
| H/O acute myocardial infarction of anterior wall                   | 412 | I25.2 |
| Hx of acute myocardial infarction of inferior wall                 | 412 | I25.2 |
| H/O acute myocardial infarction of inferior wall                   | 412 | I25.2 |
| H/O acute myocardial infarction                                    | 412 | I25.2 |
| Hx of acute myocardial infarction                                  | 412 | I25.2 |
| H/O acute myocardial infarction of lateral wall                    | 412 | I25.2 |
| Hx of acute myocardial infarction of lateral wall                  | 412 | I25.2 |
| H/O acute myocardial infarction of septum                          | 412 | I25.2 |
| Hx of acute myocardial infarction of septum                        | 412 | I25.2 |
| Old inferior wall myocardial infarction                            | 412 | I25.2 |
| Old anterior myocardial infarction                                 | 412 | I25.2 |

|                                                                              |       |       |
|------------------------------------------------------------------------------|-------|-------|
| Old inferior myocardial infarction                                           | 412   | I25.2 |
| Old anteroseptal myocardial infarction                                       | 412   | I25.2 |
| Old anterolateral wall myocardial infarction                                 | 412   | I25.2 |
| Old anterior wall myocardial infarction                                      | 412   | I25.2 |
| Old inferolateral myocardial infarction                                      | 412   | I25.2 |
| Old inferoposterior myocardial infarction                                    | 412   | I25.2 |
| Old lateral wall myocardial infarction                                       | 412   | I25.2 |
| Old true posterior myocardial infarction                                     | 412   | I25.2 |
| Anteroapical myocardial infarction greater than eight weeks ago              | 412   | I25.2 |
| Anteroseptal myocardial infarction greater than eight weeks ago              | 412   | I25.2 |
| Myocardial infarction of lateral wall greater than eight weeks ago           | 412   | I25.2 |
| Non-Q wave myocardial infarction greater than eight weeks ago                | 412   | I25.2 |
| Myocardial infarction with symptoms after 8 weeks from date of infarction    | 414.8 | I25.2 |
| History of myocardial infarction of inferior wall, greater than 8 weeks      | 412   | I25.2 |
| Myocardial infarction of anterolateral wall greater than eight weeks ago     | 412   | I25.2 |
| Myocardial infarction of inferolateral wall greater than eight weeks ago     | 412   | I25.2 |
| Non-ST elevation myocardial infarction (NSTEMI) greater than eight weeks ago | 412   | I25.2 |
| Old posterior myocardial infarction                                          | 412   | I25.2 |
| Old lateral myocardial infarction                                            | 412   | I25.2 |
| History of myocardial infarction in last year                                | 412   | I25.2 |
| History of myocardial infarct at age greater than 60 years                   | 412   | I25.2 |
| History of myocardial infarct at age less than 60 years                      | 412   | I25.2 |
| Old subendocardial infarction                                                | 412   | I25.2 |

|                                                              |     |       |
|--------------------------------------------------------------|-----|-------|
| History of anterior wall myocardial infarction               | 412 | I25.2 |
| History of anterolateral myocardial infarction               | 412 | I25.2 |
| History of inferior wall myocardial infarction               | 412 | I25.2 |
| History of lateral wall myocardial infarction                | 412 | I25.2 |
| History of myocardial infarction of septum                   | 412 | I25.2 |
| Old anterolateral myocardial infarction                      | 412 | I25.2 |
| Status post myocardial infarction                            | 412 | I25.2 |
| Acute myocardial infarct greater than 3 months ago           | 412 | I25.2 |
| History of anteroapical myocardial infarction                | 412 | I25.2 |
| Status post myocardial infarction of anterolateral wall      | 412 | I25.2 |
| Status post non-Q wave myocardial infarction                 | 412 | I25.2 |
| Status post myocardial infarction of anterior wall           | 412 | I25.2 |
| Status post anteroapical myocardial infarction               | 412 | I25.2 |
| History of myocardial infarction of inferoposterior wall     | 412 | I25.2 |
| Status post myocardial infarction of inferior wall           | 412 | I25.2 |
| Status post myocardial infarction of lateral wall            | 412 | I25.2 |
| Status post non-ST elevation myocardial infarction (NSTEMI)  | 412 | I25.2 |
| Evidence of prior myocardial infarction on electrocardiogram | 412 | I25.2 |
| Myocardial infarction, greater than 8 weeks old              | 412 | I25.2 |
| History of myocardial infarction, greater than 8 weeks ago   | 412 | I25.2 |

|                                                                          |         |       |
|--------------------------------------------------------------------------|---------|-------|
| History of myocardial infarction in adulthood                            | 412     | I25.2 |
| Myocardial infarction of inferior wall greater than 8 weeks ago          | 412     | I25.2 |
| Myocardial infarction of anterior wall greater than 8 weeks ago          | 412     | I25.2 |
| Myocardial infarction of inferolateral wall greater than 8 weeks ago     | 412     | I25.2 |
| Anteroseptal myocardial infarction greater than 8 weeks ago              | 412     | I25.2 |
| Non-Q wave myocardial infarction greater than 8 weeks ago                | 412     | I25.2 |
| Anteroapical myocardial infarction greater than 8 weeks ago              | 412     | I25.2 |
| Non-ST elevation myocardial infarction (NSTEMI) greater than 8 weeks ago | 412     | I25.2 |
| Apical myocardial infarction greater than 8 weeks ago                    | 412     | I25.2 |
| Myocardial infarction greater than 8 weeks ago                           | 412     | I25.2 |
| Myocardial infarction of anterolateral wall greater than 8 weeks ago     | 412     | I25.2 |
| Myocardial infarction of lateral wall greater than 8 weeks ago           | 412     | I25.2 |
| Evidence of prior myocardial infarction on electrocardiography           | 412     | I25.2 |
| Myocardial infarction of anterolateral wall greater than 4 weeks ago     | IMO0002 | I25.2 |
| Myocardial infarction of inferolateral wall greater than 4 weeks ago     | IMO0002 | I25.2 |
| Myocardial infarction of anterior wall greater than 4 weeks ago          | IMO0002 | I25.2 |
| Old myocardial infarction                                                |         | I25.2 |
| Aneurysm of heart (wall)                                                 | 414.1   | I25.3 |
| Other aneurysm of heart                                                  | 414.19  | I25.3 |
| Aneurysm of heart wall                                                   | 414.1   | I25.3 |
| Mural aneurysm of heart                                                  | 414.1   | I25.3 |

|                                             |        |              |
|---------------------------------------------|--------|--------------|
| Ventricular aneurysm                        | 414.1  | I25.3        |
| Atrial aneurysm                             | 414.1  | I25.3        |
| Cardiac aneurysm                            | 414.1  | I25.3        |
| Heart aneurysm                              | 414.1  | I25.3        |
| Mural aneurysm                              | 414.1  | I25.3        |
| Aneurysm of heart NEC                       | 414.19 | I25.3        |
| Aneurysm of heart                           | 414.1  | I25.3        |
| Aneurysm, mural heart                       | 414.1  | I25.3        |
| Coronary artery fistula                     | 414.19 | I25.3        |
| Aneurysm and dissection of heart            | 414.1  | I25.3        |
| Aneurysm of right ventricle of heart        | 414.1  | I25.3        |
| Aneurysm of left ventricle of heart         | 414.1  | I25.3        |
| Pseudoaneurysm of left ventricle of heart   | 414.1  | I25.3        |
| Pseudoaneurysm of right ventricle of heart  | 414.1  | I25.3        |
| Atrial septal aneurysm                      | 414.1  | I25.3        |
| Aneurysm, other cardiac                     | 414.19 | I25.3        |
| Left ventricular aneurysm                   | 414.1  | I25.3        |
| Right ventricular aneurysm                  | 414.1  | I25.3        |
| Cardiac pseudoaneurysm                      | 414.1  | I25.3        |
| Left ventricular pseudoaneurysm             | 414.1  | I25.3        |
| Aneurysm, heart wall                        | 414.1  | I25.3        |
| Fistula, coronary artery                    | 414.19 | I25.3        |
| Fossa ovalis aneurysm                       | 414.1  | I25.3        |
| RV aneurysm                                 | 414.1  | I25.3        |
| Ischemic cardiomyopathy                     | 414.8  | I25.5        |
| Cardiomyopathy, ischemic                    | 414.8  | I25.5        |
| Generalized ischemic myocardial dysfunction | 414.8  | I25.5        |
| Ischemic myocardial dysfunction             | 414.9  | I25.5        |
| Ischemic cardiomyopathy                     |        | I25.5        |
| Ischemic dilated cardiomyopathy             | 414.8  | I25.5, I42.0 |
| Silent myocardial ischemia                  | 414.8  | I25.6        |
| Asymptomatic myocardial ischemia            | 414.8  | I25.6        |
| Silent myocardial ischemia                  |        | I25.6        |

|                                                                                                                                         |               |         |
|-----------------------------------------------------------------------------------------------------------------------------------------|---------------|---------|
| Atherosclerosis of coronary artery bypass graft(s) and coronary artery of transplanted heart with angina pectoris                       |               | I25.7   |
| Atherosclerosis of coronary artery bypass graft(s), unspecified, with angina pectoris                                                   |               | I25.70  |
| Atheroscler of coronary artery bypass graft w/unstable angina pectoris                                                                  | 414.05, 411.1 | I25.700 |
| Atherosclerosis of coronary artery bypass graft with unstable angina pectoris                                                           | 414.05, 411.1 | I25.700 |
| Atherosclerosis of CABG w unstable angina pectoris                                                                                      | 414.05, 411.1 | I25.700 |
| Coronary artery disease involving coronary bypass graft with unstable angina pectoris                                                   | 414.05, 411.1 | I25.700 |
| Coronary artery disease involving coronary bypass graft of native heart with unstable angina pectoris                                   | 414.05, 411.1 | I25.700 |
| Atherosclerosis of coronary artery bypass graft of native heart with unstable angina pectoris                                           | 414.05, 411.1 | I25.700 |
| Atherosclerosis of coronary artery bypass graft with unstable angina pectoris, unspecified whether native or transplanted heart         | 414.05, 411.1 | I25.700 |
| Atherosclerosis of coronary artery bypass graft(s), unspecified, with unstable angina pectoris                                          | 414.05, 411.1 | I25.700 |
| Coronary artery disease involving coronary bypass graft with unstable angina pectoris, unspecified whether native or transplanted heart | 414.05, 411.1 | I25.700 |
| Atherosclerosis of CABG, unsp, w unstable angina pectoris                                                                               | 414.05, 411.1 | I25.700 |
| Atherosclerosis of coronary artery bypass graft(s), unspecified, with unstable angina pectoris                                          |               | I25.700 |



|                                                                                                                                                      |               |         |
|------------------------------------------------------------------------------------------------------------------------------------------------------|---------------|---------|
| Atherosclerosis of coronary artery bypass graft with angina pectoris with documented spasm                                                           | 414.05, 413.9 | I25.701 |
| Atherosclerosis of CABG w angina pectoris w documented spasm                                                                                         | 414.05, 413.9 | I25.701 |
| Coronary artery disease involving coronary bypass graft with angina pectoris with documented spasm                                                   | 414.05, 413.9 | I25.701 |
| Coronary artery disease involving coronary bypass graft of native heart with angina pectoris with documented spasm                                   | 414.05, 413.9 | I25.701 |
| Atherosclerosis of coronary artery bypass graft of native heart with angina pectoris with documented spasm                                           | 414.05, 413.9 | I25.701 |
| Atherosclerosis of coronary artery bypass graft with angina pectoris with documented spasm, unspecified whether native or transplanted heart         | 414.05, 413.9 | I25.701 |
| Atherosclerosis of coronary artery bypass graft(s), unspecified, with angina pectoris with documented spasm                                          | 414.05, 413.9 | I25.701 |
| Coronary artery disease involving coronary bypass graft with angina pectoris with documented spasm, unspecified whether native or transplanted heart | 414.05, 413.9 | I25.701 |
| Athsc CABG, unsp, w angina pectoris w documented spasm                                                                                               | 414.05, 413.9 | I25.701 |
| Atherosclerosis of coronary artery bypass graft(s), unspecified, with angina pectoris with documented spasm                                          |               | I25.701 |
| Atherosclerosis of CABG, unsp, w oth angina pectoris                                                                                                 | 414.05, 413.9 | I25.708 |
| Atherosclerosis of CABG w oth angina pectoris                                                                                                        | 414.05, 413.9 | I25.708 |
| Atherosclerosis of coronary artery bypass graft with other forms of angina pectoris                                                                  | 414.05, 413.9 | I25.708 |

|                                                                                                                                               |               |         |
|-----------------------------------------------------------------------------------------------------------------------------------------------|---------------|---------|
| Coronary artery disease involving coronary bypass graft with other forms of angina pectoris                                                   | 414.05, 413.9 | I25.708 |
| Coronary artery disease involving coronary bypass graft of native heart with other forms of angina pectoris                                   | 414.05, 413.9 | I25.708 |
| Atherosclerosis of coronary artery bypass graft of native heart with other forms of angina pectoris                                           | 414.05, 413.9 | I25.708 |
| Atherosclerosis of coronary artery bypass graft with other forms of angina pectoris, unspecified whether native or transplanted heart         | 414.05, 413.9 | I25.708 |
| Coronary artery disease of bypass graft with stable angina pectoris                                                                           | 414.05, 413.9 | I25.708 |
| Atherosclerosis of coronary artery bypass graft of native heart with stable angina pectoris                                                   | 414.04, 413.9 | I25.708 |
| Atherosclerosis of coronary artery bypass graft with stable angina pectoris                                                                   | 414.04, 413.9 | I25.708 |
| Coronary artery disease of bypass graft of native heart with stable angina pectoris                                                           | 414.05, 413.9 | I25.708 |
| Atherosclerosis of coronary artery bypass graft(s), unspecified, with other forms of angina pectoris                                          | 414.05, 413.9 | I25.708 |
| Atherosclerosis of coronary artery bypass graft with stable angina pectoris, unspecified whether native or transplanted heart                 | 414.04, 413.9 | I25.708 |
| Coronary artery disease of bypass graft with stable angina pectoris, unspecified whether native or transplanted heart                         | 414.05, 413.9 | I25.708 |
| Coronary artery disease involving coronary bypass graft with other forms of angina pectoris, unspecified whether native or transplanted heart | 414.05, 413.9 | I25.708 |

|                                                                                                                                |               |         |
|--------------------------------------------------------------------------------------------------------------------------------|---------------|---------|
| Atherosclerosis of coronary artery bypass graft(s), unspecified, with other forms of angina pectoris                           |               | I25.708 |
| Atherosclerosis of coronary artery bypass graft with angina pectoris                                                           | 414.05, 413.9 | I25.709 |
| Atherosclerosis of CABG w unsp angina pectoris                                                                                 | 414.05, 413.9 | I25.709 |
| Atherosclerosis of coronary artery bypass graft with angina pectoris, unspecified whether native or transplanted heart         | 414.05, 413.9 | I25.709 |
| Coronary artery disease involving coronary bypass graft with unspecified angina pectoris                                       | 414.05, 413.9 | I25.709 |
| Coronary artery disease involving coronary bypass graft of native heart with unspecified angina pectoris                       | 414.05, 413.9 | I25.709 |
| Atherosclerosis of coronary artery bypass graft of native heart with unspecified angina pectoris                               | 414.05, 413.9 | I25.709 |
| Coronary artery disease involving coronary bypass graft with angina pectoris                                                   | 414.05, 413.9 | I25.709 |
| Coronary artery disease involving coronary bypass graft of native heart with angina pectoris                                   | 414.05, 413.9 | I25.709 |
| Atherosclerosis of coronary artery bypass graft of native heart with angina pectoris                                           | 414.05, 413.9 | I25.709 |
| Atherosclerosis of coronary artery bypass graft(s), unspecified, with unspecified angina pectoris                              | 414.05, 413.9 | I25.709 |
| Coronary artery disease involving coronary bypass graft with angina pectoris, unspecified whether native or transplanted heart | 414.05, 413.9 | I25.709 |
| Angina concurrent with and due to arteriosclerosis of coronary artery bypass graft                                             | 413.9, 414.05 | I25.709 |

|                                                                                                                    |               |         |
|--------------------------------------------------------------------------------------------------------------------|---------------|---------|
| Angina concurrent with and due to arteriosclerosis of CABG                                                         | 413.9, 414.05 | I25.709 |
| Atherosclerosis of CABG, unsp, w unsp angina pectoris                                                              | 414.05, 413.9 | I25.709 |
| Atherosclerosis of coronary artery bypass graft(s), unspecified, with unspecified angina pectoris                  |               | I25.709 |
| Atherosclerosis of autologous vein coronary artery bypass graft(s) with angina pectoris                            |               | I25.71  |
| Atherosclerosis of autologous vein coronary artery bypass graft with unstable angina pectoris                      | 414.02, 411.1 | I25.710 |
| Coronary artery disease involving autologous vein coronary bypass graft with unstable angina pectoris              | 414.02, 411.1 | I25.710 |
| Atherosclerosis of autologous vein coronary artery bypass graft(s) with unstable angina pectoris                   | 414.02, 411.1 | I25.710 |
| Athscl autologous vein CABG w unstable angina pectoris                                                             | 414.02, 411.1 | I25.710 |
| Atherosclerosis of autologous vein coronary artery bypass graft(s) with unstable angina pectoris                   |               | I25.710 |
| Atherosclerosis of autologous vein coronary artery bypass graft with angina pectoris with documented spasm         | 414.02, 413.9 | I25.711 |
| Coronary artery disease involving autologous vein coronary bypass graft with angina pectoris with documented spasm | 414.02, 413.9 | I25.711 |
| Atherosclerosis of autologous vein coronary artery bypass graft(s) with angina pectoris with documented spasm      | 414.02, 413.9 | I25.711 |
| Athscl autologous vein CABG w ang pctrs w documented spasm                                                         | 414.02, 413.9 | I25.711 |

|                                                                                                               |               |         |
|---------------------------------------------------------------------------------------------------------------|---------------|---------|
| Atherosclerosis of autologous vein coronary artery bypass graft(s) with angina pectoris with documented spasm |               | I25.711 |
| Athscl autologous vein CABG w oth angina pectoris                                                             | 414.02, 413.9 | I25.718 |
| Atherosclerosis of autologous vein coronary artery bypass graft with other forms of angina pectoris           | 414.02, 413.9 | I25.718 |
| Coronary artery disease involving autologous vein coronary bypass graft with other forms of angina pectoris   | 414.02, 413.9 | I25.718 |
| Atherosclerosis of autologous vein coronary artery bypass graft with stable angina pectoris                   | 414.02, 413.9 | I25.718 |
| Coronary artery disease of autologous vein bypass graft with stable angina pectoris                           | 414.02, 413.9 | I25.718 |
| Atherosclerosis of autologous vein coronary artery bypass graft(s) with other forms of angina pectoris        | 414.02, 413.9 | I25.718 |
| Atherosclerosis of autologous vein coronary artery bypass graft(s) with other forms of angina pectoris        |               | I25.718 |
| Atherosclerosis of autologous vein coronary artery bypass graft with angina pectoris                          | 414.02, 413.9 | I25.719 |
| Coronary artery disease involving autologous vein coronary bypass graft with unspecified angina pectoris      | 414.02, 413.9 | I25.719 |
| Coronary artery disease involving autologous vein coronary bypass graft with angina pectoris                  | 414.02, 413.9 | I25.719 |
| Atherosclerosis of autologous vein coronary artery bypass graft(s) with unspecified angina pectoris           | 414.02, 413.9 | I25.719 |
| Athscl autologous vein CABG w unsp angina pectoris                                                            | 414.02, 413.9 | I25.719 |

|                                                                                                                      |               |         |
|----------------------------------------------------------------------------------------------------------------------|---------------|---------|
| Atherosclerosis of autologous vein coronary artery bypass graft(s) with unspecified angina pectoris                  |               | I25.719 |
| Atherosclerosis of autologous artery coronary artery bypass graft(s) with angina pectoris                            |               | I25.72  |
| Atherosclerosis of autologous artery coronary artery bypass graft with unstable angina pectoris                      | 414.04, 411.1 | I25.720 |
| Coronary artery disease involving autologous artery coronary bypass graft with unstable angina pectoris              | 414.04, 411.1 | I25.720 |
| Atherosclerosis of autologous artery coronary artery bypass graft(s) with unstable angina pectoris                   | 414.04, 411.1 | I25.720 |
| AthscI autologous artery CABG w unstable angina pectoris                                                             | 414.04, 411.1 | I25.720 |
| Atherosclerosis of autologous artery coronary artery bypass graft(s) with unstable angina pectoris                   |               | I25.720 |
| Atherosclerosis of autologous artery coronary artery bypass graft with angina pectoris with documented spasm         | 414.04, 413.9 | I25.721 |
| Coronary artery disease involving autologous artery coronary bypass graft with angina pectoris with documented spasm | 414.04, 413.9 | I25.721 |
| Atherosclerosis of autologous artery coronary artery bypass graft(s) with angina pectoris with documented spasm      | 414.04, 413.9 | I25.721 |
| AthscI autologous artery CABG w ang pctrs w documented spasm                                                         | 414.04, 413.9 | I25.721 |
| Atherosclerosis of autologous artery coronary artery bypass graft(s) with angina pectoris with documented spasm      |               | I25.721 |
| AthscI autologous artery CABG w oth angina pectoris                                                                  | 414.04, 413.9 | I25.728 |

|                                                                                                               |               |         |
|---------------------------------------------------------------------------------------------------------------|---------------|---------|
| Atherosclerosis of autologous artery coronary artery bypass graft with other forms of angina pectoris         | 414.04, 413.9 | I25.728 |
| Coronary artery disease involving autologous artery coronary bypass graft with other forms of angina pectoris | 414.04, 413.9 | I25.728 |
| Coronary artery disease of autologous bypass graft with stable angina pectoris                                | 414.04, 413.9 | I25.728 |
| Atherosclerosis of autologous artery coronary artery bypass graft with stable angina                          | 414.04, 413.9 | I25.728 |
| Atherosclerosis of autologous artery coronary artery bypass graft(s) with other forms of angina pectoris      | 414.04, 413.9 | I25.728 |
| Atherosclerosis of autologous artery coronary artery bypass graft(s) with other forms of angina pectoris      |               | I25.728 |
| Atherosclerosis of autologous artery coronary artery bypass graft with angina pectoris                        | 414.04, 413.9 | I25.729 |
| Coronary artery disease involving autologous artery coronary bypass graft with unspecified angina pectoris    | 414.04, 413.9 | I25.729 |
| Coronary artery disease involving autologous artery coronary bypass graft with angina pectoris                | 414.04, 413.9 | I25.729 |
| Atherosclerosis of autologous artery coronary artery bypass graft(s) with unspecified angina pectoris         | 414.04, 413.9 | I25.729 |
| Athscl autologous artery CABG w unsp angina pectoris                                                          | 414.04, 413.9 | I25.729 |
| Atherosclerosis of autologous artery coronary artery bypass graft(s) with unspecified angina pectoris         |               | I25.729 |
| Atherosclerosis of nonautologous biological coronary artery bypass graft(s) with angina pectoris              |               | I25.73  |

|                                                                                                                             |               |         |
|-----------------------------------------------------------------------------------------------------------------------------|---------------|---------|
| Atherosclerosis of nonautologous biological coronary artery bypass graft with unstable angina pectoris                      | 414.03, 411.1 | I25.730 |
| Coronary artery disease involving nonautologous biological coronary bypass graft with unstable angina pectoris              | 414.03, 411.1 | I25.730 |
| Atherosclerosis of nonautologous biological coronary artery bypass graft(s) with unstable angina pectoris                   | 414.03, 411.1 | I25.730 |
| AthscI nonautologous biological CABG w unstable ang pctrs                                                                   | 414.03, 411.1 | I25.730 |
| Atherosclerosis of nonautologous biological coronary artery bypass graft(s) with unstable angina pectoris                   |               | I25.730 |
| Atherosclerosis of nonautologous biological coronary artery bypass graft with angina pectoris with documented spasm         | 414.03, 413.9 | I25.731 |
| Coronary artery disease involving nonautologous biological coronary bypass graft with angina pectoris with documented spasm | 414.03, 413.9 | I25.731 |
| Atherosclerosis of nonautologous biological coronary artery bypass graft(s) with angina pectoris with documented spasm      | 414.03, 413.9 | I25.731 |
| AthscI nonaut biological CABG w ang pctrs w documented spasm                                                                | 414.03, 413.9 | I25.731 |
| Atherosclerosis of nonautologous biological coronary artery bypass graft(s) with angina pectoris with documented spasm      |               | I25.731 |
| AthscI nonautologous biological CABG w oth angina pectoris                                                                  | 414.03, 413.9 | I25.738 |
| Atherosclerosis of nonautologous biological coronary artery bypass graft with other forms of angina pectoris                | 414.03, 413.9 | I25.738 |



|                                                                                                                      |               |         |
|----------------------------------------------------------------------------------------------------------------------|---------------|---------|
| Coronary artery disease involving nonautologous biological coronary bypass graft with other forms of angina pectoris | 414.03, 413.9 | I25.738 |
| Atherosclerosis of non-autologous biological coronary artery bypass graft with stable angina pectoris                | 414.03, 413.9 | I25.738 |
| Coronary artery disease of non-autologous biological bypass graft with stable angina pectoris                        | 414.03, 413.9 | I25.738 |
| Atherosclerosis of nonautologous biological coronary artery bypass graft(s) with other forms of angina pectoris      | 414.03, 413.9 | I25.738 |
| Atherosclerosis of other coronary artery bypass graft with stable angina pectoris                                    | 414.05, 413.9 | I25.738 |
| Atherosclerosis of nonautologous biological coronary artery bypass graft(s) with other forms of angina pectoris      |               | I25.738 |
| Atherosclerosis of nonautologous biological coronary artery bypass graft with angina pectoris                        | 414.03, 413.9 | I25.739 |
| Coronary artery disease involving nonautologous biological coronary bypass graft with unspecified angina pectoris    | 414.03, 413.9 | I25.739 |
| Coronary artery disease involving nonautologous biological coronary bypass graft with angina pectoris                | 414.03, 413.9 | I25.739 |
| Atherosclerosis of nonautologous biological coronary artery bypass graft(s) with unspecified angina pectoris         | 414.03, 413.9 | I25.739 |
| Athscl nonautologous biological CABG w unsp angina pectoris                                                          | 414.03, 413.9 | I25.739 |
| Atherosclerosis of nonautologous biological coronary artery bypass graft(s) with unspecified angina pectoris         |               | I25.739 |
| Atherosclerosis of native coronary artery of transplanted heart with angina pectoris                                 |               | I25.75  |

|                                                                                                                           |               |         |
|---------------------------------------------------------------------------------------------------------------------------|---------------|---------|
| Atherosclerosis of native coronary artery of transplanted heart with unstable angina                                      | 414.06, 411.1 | I25.750 |
| Coronary artery disease involving native artery of transplanted heart with unstable angina pectoris                       | 414.06, 411.1 | I25.750 |
| Coronary artery disease involving transplanted heart with unstable angina pectoris                                        | 414.06, 413.9 | I25.750 |
| Atherosclerosis of coronary artery of transplanted heart with unstable angina pectoris                                    | 414.06, 413.9 | I25.750 |
| Coronary artery disease involving transplanted heart with unstable angina pectoris, unspecified vessel or lesion type     | 414.06, 413.9 | I25.750 |
| Atherosclerosis of coronary artery of transplanted heart with unstable angina pectoris, unspecified vessel or lesion type | 414.06, 413.9 | I25.750 |
| Athscl native cor art of txplt heart w unstable angina                                                                    | 414.06, 411.1 | I25.750 |
| Atherosclerosis of native coronary artery of transplanted heart with unstable angina                                      |               | I25.750 |
| Atherosclerosis of native coronary artery of transplanted heart with angina pectoris with documented spasm                | 414.06, 413.9 | I25.751 |
| Coronary artery disease involving native artery of transplanted heart with angina pectoris with documented spasm          | 414.06, 413.9 | I25.751 |
| Coronary artery disease involving transplanted heart with angina pectoris and documented spasm                            | 414.06, 413.9 | I25.751 |
| Atherosclerosis of coronary artery of transplanted heart with angina pectoris and documented spasm                        | 414.06, 413.9 | I25.751 |

|                                                                                                                                       |               |         |
|---------------------------------------------------------------------------------------------------------------------------------------|---------------|---------|
| Coronary artery disease involving transplanted heart with angina pectoris and documented spasm, unspecified vessel or lesion type     | 414.06, 413.9 | I25.751 |
| Atherosclerosis of coronary artery of transplanted heart with angina pectoris and documented spasm, unspecified vessel or lesion type | 414.06, 413.9 | I25.751 |
| Atherosclerosis native coronary artery of transplanted heart with angina pectoris with documented spasm                               | 414.06, 413.9 | I25.751 |
| Atherosclerosis of native coronary artery of transplanted heart with angina pectoris with documented spasm                            |               | I25.751 |
| Atherosclerosis native coronary artery of transplanted heart with other forms of angina pectoris                                      | 414.06, 413.9 | I25.758 |
| Atherosclerosis of native coronary artery of transplanted heart with other forms of angina pectoris                                   | 414.06, 413.9 | I25.758 |
| Coronary artery disease involving native artery of transplanted heart with other forms of angina pectoris                             | 414.06, 413.9 | I25.758 |
| Atherosclerosis of coronary artery of transplanted heart with other form of angina pectoris                                           | 414.06, 413.9 | I25.758 |
| Coronary artery disease involving transplanted heart with other form of angina pectoris                                               | 414.06, 413.9 | I25.758 |
| Coronary artery disease of native artery of transplanted heart with stable angina pectoris                                            | 414.06, 413.9 | I25.758 |
| Atherosclerosis of native coronary artery of transplanted heart with stable angina pectoris                                           | 414.06, 413.9 | I25.758 |
| Atherosclerosis of coronary artery of transplanted heart with stable angina pectoris                                                  | 414.06, 413.9 | I25.758 |

|                                                                                                                                |               |         |
|--------------------------------------------------------------------------------------------------------------------------------|---------------|---------|
| Atherosclerosis of coronary artery of transplanted heart with stable angina pectoris, unspecified vessel or lesion type        | 414.06, 413.9 | I25.758 |
| Atherosclerosis of coronary artery of transplanted heart with other form of angina pectoris, unspecified vessel or lesion type | 414.06, 413.9 | I25.758 |
| Coronary artery disease involving transplanted heart with other form of angina pectoris, unspecified vessel or lesion type     | 414.06, 413.9 | I25.758 |
| Atherosclerosis of native coronary artery of transplanted heart with other forms of angina pectoris                            |               | I25.758 |
| Coronary artery disease of transplanted heart with stable angina pectoris                                                      | 414.07, 413.9 | I25.758 |
| Coronary artery disease of transplanted heart with stable angina pectoris, unspecified vessel or lesion type                   | 414.07, 413.9 | I25.758 |
| Atherosclerosis of native coronary artery of transplanted heart with angina pectoris                                           | 414.06, 413.9 | I25.759 |
| Coronary artery disease involving transplanted heart with angina pectoris                                                      | 414.06, 413.9 | I25.759 |
| Atherosclerosis of coronary artery of transplanted heart with angina pectoris                                                  | 414.06, 413.9 | I25.759 |
| Coronary artery disease involving native artery of transplanted heart with unspecified angina pectoris                         | 414.06, 413.9 | I25.759 |
| Coronary artery disease involving native artery of transplanted heart with angina pectoris                                     | 414.06, 413.9 | I25.759 |
| Atherosclerosis of native coronary artery of transplanted heart with unspecified angina pectoris                               | 414.06, 413.9 | I25.759 |
| Coronary artery disease involving transplanted heart with angina pectoris, unspecified vessel or lesion type                   | 414.06, 413.9 | I25.759 |

|                                                                                                                     |               |         |
|---------------------------------------------------------------------------------------------------------------------|---------------|---------|
| Atherosclerosis of coronary artery of transplanted heart with angina pectoris, unspecified vessel or lesion type    | 414.06, 413.9 | I25.759 |
| Athsc native cor art of transplanted heart w unsp ang pctrs                                                         | 414.06, 413.9 | I25.759 |
| Atherosclerosis of native coronary artery of transplanted heart with unspecified angina pectoris                    |               | I25.759 |
| Atherosclerosis of bypass graft of coronary artery of transplanted heart with angina pectoris                       |               | I25.76  |
| Atherosclerosis of bypass graft of coronary artery of transplanted heart with unstable angina                       | 414.07, 411.1 | I25.760 |
| Coronary artery disease involving bypass graft of transplanted heart with unstable angina pectoris                  | 414.07, 411.1 | I25.760 |
| Athsc bypass of cor art of txplt heart w unstable angina                                                            | 414.07, 411.1 | I25.760 |
| Atherosclerosis of bypass graft of coronary artery of transplanted heart with unstable angina                       |               | I25.760 |
| Atherosclerosis of bypass graft of coronary artery of transplanted heart with angina pectoris with documented spasm | 414.07, 413.9 | I25.761 |
| Coronary artery disease involving bypass graft of transplanted heart with angina pectoris with documented spasm     | 414.07, 413.9 | I25.761 |
| Athsc bypass of cor art of txplt heart w ang pctrs w spasm                                                          | 414.07, 413.9 | I25.761 |
| Atherosclerosis of bypass graft of coronary artery of transplanted heart with angina pectoris with documented spasm |               | I25.761 |
| Athsc bypass of cor art of txplt heart w oth ang pctrs                                                              | 414.07, 413.9 | I25.768 |

|                                                                                                              |               |         |
|--------------------------------------------------------------------------------------------------------------|---------------|---------|
| Atherosclerosis of bypass graft of coronary artery of transplanted heart with other forms of angina pectoris | 414.07, 413.9 | I25.768 |
| Coronary artery disease involving bypass graft of transplanted heart with other forms of angina pectoris     | 414.07, 413.9 | I25.768 |
| Coronary artery disease of bypass graft of transplanted heart with stable angina pectoris                    | 414.07, 413.9 | I25.768 |
| Atherosclerosis of coronary artery bypass graft of transplanted heart with stable angina pectoris            | 414.07, 413.9 | I25.768 |
| Atherosclerosis of bypass graft of coronary artery of transplanted heart with other forms of angina pectoris |               | I25.768 |
| Atherosclerosis of bypass graft of coronary artery of transplanted heart with angina pectoris                | 414.07, 413.9 | I25.769 |
| Coronary artery disease involving bypass graft of transplanted heart with unspecified angina pectoris        | 414.07, 413.9 | I25.769 |
| Coronary artery disease involving bypass graft of transplanted heart with angina pectoris                    | 414.07, 413.9 | I25.769 |
| Atherosclerosis of bypass graft of coronary artery of transplanted heart with unspecified angina pectoris    | 414.07, 413.9 | I25.769 |
| Athsc bypass of cor art of txplt heart w unsp ang pctr                                                       | 414.07, 413.9 | I25.769 |
| Atherosclerosis of bypass graft of coronary artery of transplanted heart with unspecified angina pectoris    |               | I25.769 |
| Atherosclerosis of other coronary artery bypass graft(s) with angina pectoris                                |               | I25.79  |
| Atherosclerosis of other coronary artery bypass graft with unstable angina pectoris                          | 414.04, 411.1 | I25.790 |

|                                                                                                                 |               |         |
|-----------------------------------------------------------------------------------------------------------------|---------------|---------|
| Coronary artery disease involving other coronary artery bypass graft with unstable angina pectoris              | 414.05, 411.1 | I25.790 |
| Atherosclerosis of other coronary artery bypass graft(s) with unstable angina pectoris                          | 414.04, 411.1 | I25.790 |
| Atherosclerosis of other coronary artery bypass graft(s) with unstable angina pectoris                          |               | I25.790 |
| Atherosclerosis of other coronary artery bypass graft with angina pectoris with documented spasm                | 414.04, 413.9 | I25.791 |
| Coronary artery disease involving other coronary artery bypass graft with angina pectoris with documented spasm | 414.05, 413.9 | I25.791 |
| Atherosclerosis of other coronary artery bypass graft(s) with angina pectoris with documented spasm             | 414.04, 413.9 | I25.791 |
| Atherosclerosis of other coronary artery bypass graft(s) with angina pectoris with documented spasm             |               | I25.791 |
| Atherosclerosis of other coronary artery bypass graft with other form of angina pectoris                        | 414.04, 413.9 | I25.798 |
| Coronary artery disease involving other coronary artery bypass graft with other forms of angina pectoris        | 414.05, 413.9 | I25.798 |
| Atherosclerosis of other coronary artery bypass graft(s) with other forms of angina pectoris                    | 414.04, 413.9 | I25.798 |
| Coronary artery disease of other bypass graft with stable angina pectoris                                       | 414.05, 413.9 | I25.798 |
| Atherosclerosis of other coronary artery bypass graft(s) with other forms of angina pectoris                    |               | I25.798 |
| Atherosclerosis of other coronary artery bypass graft with angina pectoris                                      | 414.04, 413.9 | I25.799 |

|                                                                                                       |               |         |
|-------------------------------------------------------------------------------------------------------|---------------|---------|
| Coronary artery disease involving other coronary artery bypass graft with unspecified angina pectoris | 414.05, 413.9 | I25.799 |
| Atherosclerosis of other coronary artery bypass graft(s) with unspecified angina pectoris             | 414.04, 413.9 | I25.799 |
| Coronary artery disease involving other coronary artery bypass graft with angina pectoris             | 414.05, 413.9 | I25.799 |
| Atherosclerosis of other coronary artery bypass graft(s) with unspecified angina pectoris             |               | I25.799 |
| Other forms of chronic ischemic heart disease                                                         |               | I25.8   |
| Atherosclerosis of other coronary vessels without angina pectoris                                     |               | I25.81  |
| Coronary atherosclerosis of autologous vein bypass graft                                              | 414.02        | I25.810 |
| Coronary atherosclerosis of nonautologous biological bypass graft                                     | 414.03        | I25.810 |
| Coronary atherosclerosis of artery bypass graft                                                       | 414.04        | I25.810 |
| Coronary atherosclerosis of unspecified type of bypass graft(414.05)                                  | 414.05        | I25.810 |
| Coronary atherosclerosis of internal mammary artery                                                   | 414.04        | I25.810 |
| Coronary atherosclerosis of bypass graft                                                              | 414.04        | I25.810 |
| CAD (coronary artery disease), autologous vein bypass graft                                           | 414.02        | I25.810 |
| CAD (coronary artery disease), nonautologous biological bypass graft                                  | 414.03        | I25.810 |
| CAD (coronary artery disease) of bypass graft                                                         | 414.05        | I25.810 |
| CAD (coronary artery disease) of artery bypass graft                                                  | 414.05        | I25.810 |
| Atherosclerosis of coronary artery bypass graft                                                       | 414.04        | I25.810 |



|                                                                          |        |         |
|--------------------------------------------------------------------------|--------|---------|
| Coronary atherosclerosis of autologous artery bypass graft               | 414.04 | I25.810 |
| CAD of autologous arterial graft                                         | 414.04 | I25.810 |
| Coronary atherosclerosis of autologous bypass graft                      | 414.02 | I25.810 |
| CAD of autologous bypass graft                                           | 414.02 | I25.810 |
| Hardening of bypass graft of coronary artery                             | 414.04 | I25.810 |
| Coronary atherosclerosis of vein bypass graft                            | 414.05 | I25.810 |
| Atherosclerosis of coronary artery bypass graft w/o angina pectoris      | 414.05 | I25.810 |
| Atherosclerosis of coronary artery bypass graft without angina pectoris  | 414.05 | I25.810 |
| Arteriosclerosis of internal mammary artery coronary artery bypass graft | 414.04 | I25.810 |
| Arteriosclerosis of nonautologous coronary artery bypass graft           | 414.03 | I25.810 |
| Arteriosclerosis of autologous vein coronary artery bypass graft         | 414.02 | I25.810 |
| Atherosclerotic heart disease of artery bypass graft                     | 414.04 | I25.810 |
| Arteriosclerosis of coronary artery bypass graft                         | 414.04 | I25.810 |
| Atherosclerosis of nonbiological coronary artery bypass graft            | 414.05 | I25.810 |
| Coronary atherosclerosis of unspecified type of bypass graft             | 414.04 | I25.810 |
| Arteriosclerosis of arterial coronary artery bypass graft                | 414.05 | I25.810 |
| Arteriosclerosis of autologous arterial coronary artery bypass graft     | 414.04 | I25.810 |
| Arteriosclerosis of autologous coronary artery bypass graft              | 414.05 | I25.810 |
| Arteriosclerosis of bypass graft of coronary artery                      | 414.04 | I25.810 |

|                                                                                                          |        |         |
|----------------------------------------------------------------------------------------------------------|--------|---------|
| Coronary atherosclerosis of internal mammary artery bypass graft                                         | 414.04 | I25.810 |
| Coronary atherosclerosis of autologous artery bypass graft without angina                                | 414.04 | I25.810 |
| CAD of autologous artery bypass graft without angina                                                     | 414.04 | I25.810 |
| Coronary atherosclerosis of autologous vein bypass graft without angina                                  | 414.02 | I25.810 |
| CAD of autologous vein bypass graft without angina                                                       | 414.02 | I25.810 |
| Coronary artery disease involving autologous vein bypass graft                                           | 414.02 | I25.810 |
| Coronary artery disease involving nonautologous biological coronary bypass graft                         | 414.03 | I25.810 |
| Coronary artery disease involving coronary bypass graft                                                  | 414.05 | I25.810 |
| Coronary artery disease involving autologous artery coronary bypass graft without angina pectoris        | 414.04 | I25.810 |
| Coronary artery disease involving coronary bypass graft without angina pectoris                          | 414.05 | I25.810 |
| Coronary artery disease involving autologous artery coronary bypass graft                                | 414.04 | I25.810 |
| Coronary artery disease involving nonautologous biological coronary bypass graft without angina pectoris | 414.03 | I25.810 |
| Coronary artery disease involving autologous vein coronary bypass graft without angina pectoris          | 414.02 | I25.810 |
| Coronary artery disease involving coronary bypass graft of native heart                                  | 414.04 | I25.810 |
| Coronary artery disease involving coronary bypass graft of native heart without angina pectoris          | 414.05 | I25.810 |
| Atherosclerosis of coronary artery bypass graft of native heart                                          | 414.04 | I25.810 |

|                                                                                                                                   |        |         |
|-----------------------------------------------------------------------------------------------------------------------------------|--------|---------|
| Atherosclerosis of coronary artery bypass graft of native heart without angina pectoris                                           | 414.05 | I25.810 |
| Arteriosclerosis of nonautologous coronary artery bypass graft without angina pectoris                                            | 414.03 | I25.810 |
| Coronary arteriosclerosis after coronary artery bypass grafting                                                                   | 414.05 | I25.810 |
| Atherosclerosis of coronary artery bypass graft without angina pectoris, unspecified whether native or transplanted heart         | 414.05 | I25.810 |
| Coronary artery disease involving other coronary artery bypass graft                                                              | 414.05 | I25.810 |
| Coronary artery disease involving other coronary artery bypass graft without angina pectoris                                      | 414.05 | I25.810 |
| Atherosclerosis of other coronary artery bypass graft without angina pectoris                                                     | 414.04 | I25.810 |
| Atherosclerotic heart disease of nonautologous biological bypass graft                                                            | 414.03 | I25.810 |
| Atherosclerosis of autologous vein coronary artery bypass graft                                                                   | 414.02 | I25.810 |
| Atherosclerosis of nonautologous biological coronary artery bypass graft                                                          | 414.03 | I25.810 |
| Atherosclerosis of coronary artery bypass graft(s) without angina pectoris                                                        | 414.05 | I25.810 |
| Atherosclerosis of other coronary artery bypass graft                                                                             | 414.04 | I25.810 |
| Coronary artery disease involving coronary bypass graft without angina pectoris, unspecified whether native or transplanted heart | 414.05 | I25.810 |
| Atherosclerosis of coronary artery bypass graft, angina presence unspecified, unspecified whether native or transplanted heart    | 414.04 | I25.810 |

|                                                                                                                                        |        |         |
|----------------------------------------------------------------------------------------------------------------------------------------|--------|---------|
| Atherosclerosis of nonautologous biological coronary artery bypass graft, angina presence unspecified                                  | 414.03 | I25.810 |
| Coronary artery disease involving coronary bypass graft, angina presence unspecified, unspecified whether native or transplanted heart | 414.05 | I25.810 |
| Coronary artery disease involving autologous vein bypass graft, angina presence unspecified                                            | 414.02 | I25.810 |
| Coronary artery disease involving coronary bypass graft of native heart, angina presence unspecified                                   | 414.04 | I25.810 |
| Atherosclerosis of other coronary artery bypass graft, angina presence unspecified                                                     | 414.04 | I25.810 |
| Coronary artery disease involving nonautologous biological coronary bypass graft, angina presence unspecified                          | 414.03 | I25.810 |
| Atherosclerosis of autologous vein coronary artery bypass graft, angina presence unspecified                                           | 414.02 | I25.810 |
| Atherosclerosis of coronary artery bypass graft of native heart, angina presence unspecified                                           | 414.04 | I25.810 |
| Coronary artery disease involving autologous artery coronary bypass graft, angina presence unspecified                                 | 414.04 | I25.810 |
| Arteriosclerosis of autologous arterial coronary artery bypass graft, angina presence unspecified                                      | 414.04 | I25.810 |
| Coronary artery disease involving other coronary artery bypass graft, angina presence unspecified                                      | 414.05 | I25.810 |
| Atherosclerosis of CABG w/o angina pectoris                                                                                            | 414.05 | I25.810 |
| Atherosclerosis of coronary artery bypass graft(s) without angina pectoris                                                             |        | I25.810 |

|                                                                                               |        |         |
|-----------------------------------------------------------------------------------------------|--------|---------|
| Coronary atherosclerosis of native coronary artery of transplanted heart                      | 414.06 | I25.811 |
| Coronary atherosclerosis of coronary artery of transplanted heart                             | 414.06 | I25.811 |
| Coronary arteriosclerosis of transplanted heart                                               | 414.06 | I25.811 |
| Coronary atherosclerosis transplanted heart                                                   | 414.06 | I25.811 |
| CAD (coronary artery disease), native artery transplanted heart                               | 414.06 | I25.811 |
| Accelerated coronary artery disease in transplanted heart                                     | 414.06 | I25.811 |
| Coronary artery disease of transplanted heart                                                 | 414.06 | I25.811 |
| Coronary atherosclerosis of artery of transplanted heart                                      | 414.06 | I25.811 |
| Coronary atherosclerosis of native artery of transplanted heart                               | 414.06 | I25.811 |
| Coronary arteriosclerosis of native coronary artery of transplanted heart                     | 414.06 | I25.811 |
| Atherosclerosis of native coronary artery of transplanted heart without angina pectoris       | 414.06 | I25.811 |
| Coronary atherosclerosis of transplanted heart                                                | 414.06 | I25.811 |
| Atherosclerotic heart disease of coronary artery of transplanted heart                        | 414.06 | I25.811 |
| Atherosclerosis of coronary artery of transplanted heart                                      | 414.06 | I25.811 |
| Coronary artery disease involving native artery of transplanted heart                         | 414.06 | I25.811 |
| Coronary artery disease involving native artery of transplanted heart without angina pectoris | 414.06 | I25.811 |
| Atherosclerosis of native coronary artery of transplanted heart                               | 414.06 | I25.811 |
| Coronary artery disease involving transplanted heart                                          | 414.06 | I25.811 |

|                                                                                                                          |        |         |
|--------------------------------------------------------------------------------------------------------------------------|--------|---------|
| Atherosclerosis of coronary artery of transplanted heart without angina pectoris                                         | 414.06 | I25.811 |
| Coronary artery disease involving transplanted heart without angina pectoris                                             | 414.06 | I25.811 |
| Artscl ntv coron trnspl heart                                                                                            | 414.06 | I25.811 |
| Atherosclerosis of coronary artery of transplanted heart, angina presence unspecified, unspecified vessel or lesion type | 414.06 | I25.811 |
| Coronary artery disease involving transplanted heart, angina presence unspecified, unspecified vessel or lesion type     | 414.06 | I25.811 |
| Atherosclerosis of native coronary artery of transplanted heart, angina presence unspecified                             | 414.06 | I25.811 |
| Coronary artery disease involving native artery of transplanted heart, angina presence unspecified                       | 414.06 | I25.811 |
| Atherosclerosis of coronary artery of transplanted heart without angina pectoris, unspecified vessel or lesion type      | 414.06 | I25.811 |
| Coronary artery disease involving transplanted heart without angina pectoris, unspecified vessel or lesion type          | 414.06 | I25.811 |
| Athscl native cor art of transplanted heart w/o ang pctrs                                                                | 414.06 | I25.811 |
| Atherosclerosis of native coronary artery of transplanted heart without angina pectoris                                  |        | I25.811 |
| Coronary atherosclerosis of bypass graft of transplanted heart                                                           | 414.07 | I25.812 |
| CAD (coronary artery disease), bypass graft transplanted heart                                                           | 414.07 | I25.812 |

|                                                                                                    |               |         |
|----------------------------------------------------------------------------------------------------|---------------|---------|
| Atherosclerosis of bypass graft of coronary artery of transplanted heart without angina pectoris   | 414.07        | I25.812 |
| Arteriosclerosis of coronary artery bypass graft of transplanted heart                             | 414.07        | I25.812 |
| Coronary artery disease involving bypass graft of transplanted heart                               | 414.07        | I25.812 |
| Coronary artery disease involving bypass graft of transplanted heart without angina pectoris       | 414.07        | I25.812 |
| Atherosclerosis of coronary artery bypass graft of transplanted heart                              | 414.07        | I25.812 |
| Coronary artery disease involving bypass graft of transplanted heart, angina presence unspecified  | 414.07        | I25.812 |
| Atherosclerosis of coronary artery bypass graft of transplanted heart, angina presence unspecified | 414.07        | I25.812 |
| Athsc bypass of cor art of transplanted heart w/o ang pctrs                                        | 414.07        | I25.812 |
| Atherosclerosis of bypass graft of coronary artery of transplanted heart without angina pectoris   |               | I25.812 |
| Chronic total occlusion of coronary artery(414.2)                                                  | 414.2         | I25.82  |
| Complete occlusion of coronary artery, chronic                                                     | 414.00, 414.2 | I25.82  |
| Total occlusion of coronary artery, chronic                                                        | 414.00, 414.2 | I25.82  |
| Coronary artery chronic total occlusion                                                            | 414.00, 414.2 | I25.82  |
| Chronic total occlusion of coronary artery                                                         | 414.00, 414.2 | I25.82  |
| Chronic total occlusion of coronary artery                                                         |               | I25.82  |
| Coronary atherosclerosis due to lipid rich plaque (CODE)                                           | 414.3         | I25.83  |
| Coronary atherosclerosis due to lipid rich plaque                                                  |               | I25.83  |

|                                                                             |               |        |
|-----------------------------------------------------------------------------|---------------|--------|
| Coronary atherosclerosis due to calcified coronary lesion(414.4)            | 414.4         | 125.84 |
| Coronary atherosclerosis due to severely calcified coronary lesion          | 414.00, 414.4 | 125.84 |
| Coronary atherosclerosis due to calcified coronary lesion (CODE)            | 414.00, 414.4 | 125.84 |
| Coronary atherosclerosis due to calcified coronary lesion                   |               | 125.84 |
| Cardiac microvascular disease                                               | 414.8         | 125.89 |
| Other specified forms of chronic ischemic heart disease                     | 414.8         | 125.89 |
| Chronic coronary insufficiency                                              | 414.8         | 125.89 |
| CCI (chronic coronary insufficiency)                                        | 414.8         | 125.89 |
| Symptomatic old MI (myocardial infarction)                                  | 414.8         | 125.89 |
| Chronotropic incompetence with ischemic heart disease                       | 414.9         | 125.89 |
| Symptomatic old myocardial infarction                                       | 414.8         | 125.89 |
| Other forms of chronic ischemic heart disease                               | 414.8         | 125.89 |
| Ischemic heart disease with chronotropic incompetence                       | 414.9         | 125.89 |
| Other forms of chronic ischemic heart disease (CODE)                        | 414.8         | 125.89 |
| Other forms of chronic ischemic heart disease                               |               | 125.89 |
| Ischemic chest pain                                                         | 786.5         | 125.9  |
| Chest pain due to myocardial ischemia                                       | 786.5         | 125.9  |
| Chest pain due to myocardial ischemia, unspecified ischemic chest pain type | 786.5         | 125.9  |
| Chronic ischemic heart disease, unspecified                                 | 414.9         | 125.9  |
| Chronic ischemic heart disease                                              | 414.9         | 125.9  |
| Ischemic heart disease                                                      | 414.9         | 125.9  |
| Myocardial ischemia                                                         | 414.8         | 125.9  |
| Chronic ischemia, myocardial                                                | 414.8         | 125.9  |



|                                                                                                                                   |               |               |
|-----------------------------------------------------------------------------------------------------------------------------------|---------------|---------------|
| Ischemic heart disease or syndrome, chronic                                                                                       | 414.9         | I25.9         |
| Cardiac ischemia                                                                                                                  | 414.9         | I25.9         |
| IHD (ischemic heart disease)                                                                                                      | 414.9         | I25.9         |
| Ischemic heart disease or syndrome                                                                                                | 414.9         | I25.9         |
| Myocardial ischemia or hypoxia                                                                                                    | 414.8         | I25.9         |
| Chronic myocardial ischemia                                                                                                       | 414.8         | I25.9         |
| Poor blood flow to the heart muscle                                                                                               | 414.9         | I25.9         |
| Ischemia of heart, chronic                                                                                                        | 414.9         | I25.9         |
| Ischemic heart disease, chronic                                                                                                   | 414.9         | I25.9         |
| Ischemia, myocardial, chronic                                                                                                     | 414.8         | I25.9         |
| Chronic myocardial infarction                                                                                                     | 414.9         | I25.9         |
| Myocardial infarction, chronic                                                                                                    | 414.9         | I25.9         |
| Supply ischemia of myocardium                                                                                                     | 414.9         | I25.9         |
| Sleep related coronary artery ischemia                                                                                            | 414.9         | I25.9         |
| Asymptomatic coronary heart disease                                                                                               | 414.9         | I25.9         |
| Sleep related myocardial ischemia                                                                                                 | 414.9         | I25.9         |
| Myocardial ischemia due to inadequate myocardial oxygen supply                                                                    | 414.9         | I25.9         |
| Subacute ischemic heart disease                                                                                                   | 414.9         | I25.9         |
| Resting ischemia due to ischemic heart disease                                                                                    | 443.9, 414.9  | I25.9         |
| Chronic ischemic heart disease, unspecified                                                                                       |               | I25.9         |
| Mixed myocardial ischemia and ST elevation myocardial infarction (STEMI) involving left main coronary artery                      | 414.9, 410.10 | I25.9, I21.01 |
| Mixed myocardial ischemia and ST elevation myocardial infarction (STEMI) involving left anterior descending (LAD) coronary artery | 414.9, 410.10 | I25.9, I21.02 |
| Mixed myocardial ischemia and ST elevation myocardial infarction (STEMI) involving right coronary artery                          | 414.9, 410.10 | I25.9, I21.11 |
| Mixed myocardial ischemia and ST elevation myocardial infarction (STEMI) involving left circumflex coronary artery                | 414.9, 410.80 | I25.9, I21.21 |

|                                                                                              |                |                |
|----------------------------------------------------------------------------------------------|----------------|----------------|
| Mixed myocardial ischemia and ST elevation myocardial infarction (STEMI)                     | 414.9, 410.90  | I25.9, I21.3   |
| Mixed myocardial ischemia and non-ST elevation myocardial infarction                         | 414.9, 410.70  | I25.9, I21.4   |
| Mixed myocardial ischemia and non-ST elevation myocardial infarction (NSTEMI)                | 414.9, 410.70  | I25.9, I21.4   |
| Mixed myocardial ischemia and infarction                                                     | 410.9          | I25.9, I21.9   |
| Cardiomyopathy with implantable cardioverter-defibrillator                                   | 425.4, V45.02  | I42.9, Z95.810 |
| Systolic heart failure secondary to coronary artery disease                                  | 428.20, 414.00 | I50.20, I25.10 |
| Heart failure, systolic, due to CAD                                                          | 428.20, 414.00 | I50.20, I25.10 |
| ACC/AHA stage C systolic heart failure due to ischemic cardiomyopathy                        | 428.9, 414.8   | I50.20, I25.5  |
| ACC/AHA stage B systolic heart failure due to ischemic cardiomyopathy                        | 428.9, 414.8   | I50.20, I25.5  |
| Diastolic heart failure secondary to coronary artery disease                                 | 428.30, 414.00 | I50.30, I25.10 |
| Heart failure, diastolic, due to CAD                                                         | 428.30, 414.00 | I50.30, I25.10 |
| Heart failure, diastolic, due to CAD, unspecified failure chronicity                         | 428.30, 414.00 | I50.30, I25.10 |
| Diastolic heart failure secondary to coronary artery disease, unspecified failure chronicity | 428.30, 414.00 | I50.30, I25.10 |
| Heart failure, diastolic, due to CAD, acute                                                  | 428.31         | I50.31, I25.10 |
| Diastolic heart failure secondary to coronary artery disease, acute                          | 428.31         | I50.31, I25.10 |
| Acute diastolic heart failure secondary to coronary artery disease                           | 428.31         | I50.31, I25.10 |
| Diastolic heart failure secondary to coronary artery disease, chronic                        | 428.32         | I50.32, I25.10 |
| Heart failure, diastolic, due to CAD, chronic                                                | 428.32         | I50.32, I25.10 |
| Chronic diastolic heart failure secondary to coronary artery disease                         | 428.32         | I50.32, I25.10 |
| Heart failure, diastolic, due to CAD, acute on chronic                                       | 428.33, 414.00 | I50.33, I25.10 |

|                                                                                                |                |                |
|------------------------------------------------------------------------------------------------|----------------|----------------|
| Diastolic heart failure secondary to coronary artery disease, acute on chronic                 | 428.33, 414.00 | I50.33, I25.10 |
| Acute on chronic diastolic heart failure secondary to coronary artery disease                  | 428.33, 414.00 | I50.33, I25.10 |
| Acute on chronic diastolic heart failure due to coronary artery disease                        | 428.33, 414.00 | I50.33, I25.10 |
| ACC/AHA stage B congestive heart failure due to ischemic cardiomyopathy                        | 428.0, 414.8   | I50.9, I25.5   |
| ACC/AHA stage C congestive heart failure due to ischemic cardiomyopathy                        | 428.0, 414.8   | I50.9, I25.5   |
| Cerebral infarction due to unspecified occlusion or stenosis of precerebral arteries           |                | I63.2          |
| Occlusion and stenosis of multiple and bilateral precerebral arteries with cerebral infarction | 433.31         | I63.20         |
| Occlusion and stenosis of unspecified precerebral artery with cerebral infarction              | 433.91         | I63.20         |
| Occlusion and stenosis of precerebral artery with cerebral infarction                          | 433.91         | I63.20         |
| Multiple precerebral artery occlusions with cerebral infarction                                | 433.31         | I63.20         |
| Precerebral artery stenosis/occlusion with infarction                                          | 433.91         | I63.20         |
| Precerebral artery stenosis/occlusion, multiple/bilater, with infarct                          | 433.31         | I63.20         |
| Precerebral occlusion with cerebral infarction                                                 | 433.91         | I63.20         |
| Stenosis of precerebral artery with cerebral infarction                                        | 433.91         | I63.20         |
| Extracranial artery stenosis with infarction                                                   | 433.91         | I63.20         |
| Precerebral artery occlusion with infarction                                                   | 433.91         | I63.20         |
| Occlusion of precerebral artery with infarction                                                | 433.91         | I63.20         |

|                                                                                                  |        |        |
|--------------------------------------------------------------------------------------------------|--------|--------|
| Occlusion and stenosis of multiple and bilateral arteries, with cerebral infarction              | 433.31 | I63.20 |
| Cerebral infarction due to occlusion or stenosis of precerebral arteries                         | 433.91 | I63.20 |
| Multiple and bilateral precerebral artery stenosis with infarction                               | 433.31 | I63.20 |
| Occlusion of multiple and bilateral precerebral arteries with cerebral infarction                | 433.31 | I63.20 |
| Cerebral infarction due to occlusion or stenosis of precerebral artery                           | 433.91 | I63.20 |
| Cerebral infarction due to stenosis of precerebral artery                                        | 433.91 | I63.20 |
| Infarction due to disorder of precerebral artery                                                 | 433.91 | I63.20 |
| Mult precerebral occ w/ infarc                                                                   | 433.31 | I63.20 |
| Precerebral occl w/ infarct                                                                      | 433.91 | I63.20 |
| Cerebrovascular accident (CVA) due to occlusion of precerebral artery                            | 433.91 | I63.20 |
| Stroke due to stenosis of precerebral artery                                                     | 433.91 | I63.20 |
| Stroke due to occlusion of precerebral artery                                                    | 433.91 | I63.20 |
| Cerebrovascular accident (CVA) due to stenosis of precerebral artery                             | 433.91 | I63.20 |
| Cerebral infarction due to occlusion of precerebral artery                                       | 434.91 | I63.20 |
| Cerebral infarction due to unspecified occlusion or stenosis of unspecified precerebral arteries | 433.91 | I63.20 |
| Bilateral cerebral infarction due to occlusion of precerebral artery                             | 434.91 | I63.20 |
| Cereb infrc due to unsp occls or stenosis of unsp precerebral art                                | 433.91 | I63.20 |
| Cerebral infarction due to unspecified occlusion or stenosis of unspecified precerebral arteries |        | I63.20 |

|                                                                                               |        |                 |
|-----------------------------------------------------------------------------------------------|--------|-----------------|
| Cerebral infarction due to unspecified occlusion or stenosis of vertebral arteries            |        | I63.21          |
| Cereb infrc due to unsp occls or stenosis of right vertebral art                              | 433.21 | I63.211         |
| Cerebral infarction involving right vertebral artery                                          | 433.21 | I63.211         |
| Cerebral infarction due to occlusion of right vertebral artery                                | 433.21 | I63.211         |
| Cerebral infarction due to stenosis of right vertebral artery                                 | 433.21 | I63.211         |
| Cerebral infarction involving vertebral artery, right                                         | 433.21 | I63.211         |
| Cerebrovascular accident (CVA) due to occlusion of right vertebral artery                     | 433.21 | I63.211         |
| Stroke due to stenosis of right vertebral artery                                              | 433.21 | I63.211         |
| Stroke due to occlusion of right vertebral artery                                             | 433.21 | I63.211         |
| Cerebrovascular accident (CVA) due to stenosis of right vertebral artery                      | 433.21 | I63.211         |
| Cerebral infarction due to unspecified occlusion or stenosis of right vertebral arteries      | 433.21 | I63.211         |
| Cerebral infarction due to unspecified occlusion or stenosis of right vertebral artery        | 433.21 | I63.211         |
| Cerebral infarction due to unspecified occlusion or stenosis of right vertebral artery (CODE) | 433.21 | I63.211         |
| Cerebral infarction due to unspecified occlusion or stenosis of right vertebral artery        |        | I63.211         |
| Acute arterial ischemic stroke, vertebrobasilar, brainstem, right                             | 434.91 | I63.211, I63.22 |
| Arterial ischemic stroke, vertebrobasilar, brainstem, acute, right                            | 434.91 | I63.211, I63.22 |
| Acute ischemic VBA thalamic stroke, right                                                     | 434.91 | I63.211, I63.22 |

|                                                                                         |        |                 |
|-----------------------------------------------------------------------------------------|--------|-----------------|
| Acute arterial ischemic stroke, vertebrobasilar, thalamic, right                        | 434.91 | I63.211, I63.22 |
| Acute ischemic vertebrobasilar artery thalamic stroke, right                            | 434.91 | I63.211, I63.22 |
| Arterial ischemic stroke, vertebrobasilar, thalamic, acute, right                       | 434.91 | I63.211, I63.22 |
| Acute ischemic vertebrobasilar artery brainstem stroke, right                           | 434.91 | I63.211, I63.22 |
| Acute ischemic VBA brainstem stroke, right                                              | 434.91 | I63.211, I63.22 |
| Acute ischemic vertebrobasilar artery brainstem stroke involving right-sided vessel     | 434.91 | I63.211, I63.22 |
| Acute ischemic vertebrobasilar artery thalamic stroke involving right-sided vessel      | 434.91 | I63.211, I63.22 |
| Cereb infrc due to unsp occls or stenosis of left verteb art                            | 433.21 | I63.212         |
| Cerebral infarction involving left vertebral artery                                     | 433.21 | I63.212         |
| Cerebral infarction due to occlusion of left vertebral artery                           | 433.21 | I63.212         |
| Cerebral infarction due to stenosis of left vertebral artery                            | 433.21 | I63.212         |
| Cerebral infarction involving vertebral artery, left                                    | 433.21 | I63.212         |
| Cerebrovascular accident (CVA) due to occlusion of left vertebral artery                | 433.21 | I63.212         |
| Stroke due to occlusion of left vertebral artery                                        | 433.21 | I63.212         |
| Stroke due to stenosis of left vertebral artery                                         | 433.21 | I63.212         |
| Cerebrovascular accident (CVA) due to stenosis of left vertebral artery                 | 433.21 | I63.212         |
| Cerebral infarction due to unspecified occlusion or stenosis of left vertebral arteries | 433.21 | I63.212         |

|                                                                                              |        |                 |
|----------------------------------------------------------------------------------------------|--------|-----------------|
| Cerebral infarction due to unspecified occlusion or stenosis of left vertebral artery        | 433.21 | I63.212         |
| Cerebral infarction due to unspecified occlusion or stenosis of left vertebral artery (CODE) | 433.21 | I63.212         |
| Cerebral infarction due to unspecified occlusion or stenosis of left vertebral artery        |        | I63.212         |
| Acute ischemic VBA brainstem stroke, left                                                    | 434.91 | I63.212, I63.22 |
| Arterial ischemic stroke, vertebrobasilar, thalamic, acute, left                             | 434.91 | I63.212, I63.22 |
| Acute ischemic VBA thalamic stroke, left                                                     | 434.91 | I63.212, I63.22 |
| Acute arterial ischemic stroke, vertebrobasilar, thalamic, left                              | 434.91 | I63.212, I63.22 |
| Acute ischemic vertebrobasilar artery thalamic stroke, left                                  | 434.91 | I63.212, I63.22 |
| Arterial ischemic stroke, vertebrobasilar, brainstem, acute, left                            | 434.91 | I63.212, I63.22 |
| Acute arterial ischemic stroke, vertebrobasilar, brainstem, left                             | 434.91 | I63.212, I63.22 |
| Acute ischemic vertebrobasilar artery brainstem stroke, left                                 | 434.91 | I63.212, I63.22 |
| Acute ischemic vertebrobasilar artery brainstem stroke involving left-sided vessel           | 434.91 | I63.212, I63.22 |
| Acute ischemic vertebrobasilar artery thalamic stroke involving left-sided vessel            | 434.91 | I63.212, I63.22 |
| Cerebral infarction due to bilateral stenosis of vertebral arteries                          | 433.31 | I63.213         |
| Cerebral infarction due to bilateral occlusion of vertebral arteries                         | 433.31 | I63.213         |
| Cerebrovascular accident (CVA) due to bilateral stenosis of vertebral arteries               | 433.31 | I63.213         |
| Cerebrovascular accident (CVA) due to bilateral occlusion of vertebral arteries              | 433.31 | I63.213         |

|                                                                                                |        |         |
|------------------------------------------------------------------------------------------------|--------|---------|
| Cerebral infarction due to unspecified occlusion or stenosis of bilateral vertebral arteries   | 433.21 | I63.213 |
| Cerebral infarction due to unspecified occlusion or stenosis of bilateral vertebral arteries   |        | I63.213 |
| Occlusion and stenosis of vertebral artery with cerebral infarction                            | 433.21 | I63.219 |
| Vertebral artery stroke                                                                        | 433.21 | I63.219 |
| Stroke, vertebral artery                                                                       | 433.21 | I63.219 |
| Vertebral artery stenosis/occlusion with infarction                                            | 433.21 | I63.219 |
| Vertebral artery stenosis with cerebral infarction                                             | 433.21 | I63.219 |
| Cereb infrc due to unsp occls or stenosis of unsp verteb art                                   | 433.21 | I63.219 |
| Cerebral infarction involving vertebral artery                                                 | 433.21 | I63.219 |
| Cerebral infarction associated with stenosis of vertebral artery                               | 433.21 | I63.219 |
| Cerebral infarction due to occlusion of vertebral artery                                       | 433.21 | I63.219 |
| Cerebral infarction due to stenosis of vertebral artery                                        | 433.21 | I63.219 |
| Cerebral infarction involving vertebral artery, unspecified laterality                         | 433.21 | I63.219 |
| Cerebrovascular accident (CVA) due to occlusion of vertebral artery                            | 433.21 | I63.219 |
| Cerebrovascular accident (CVA) due to stenosis of vertebral artery                             | 433.21 | I63.219 |
| Stroke due to occlusion of vertebral artery                                                    | 433.21 | I63.219 |
| Stroke due to stenosis of vertebral artery                                                     | 433.21 | I63.219 |
| Cerebral infarction due to unspecified occlusion or stenosis of unspecified vertebral arteries | 433.21 | I63.219 |



|                                                                                                          |        |                 |
|----------------------------------------------------------------------------------------------------------|--------|-----------------|
| Cerebral infarction due to stenosis of vertebral artery, unspecified blood vessel laterality             | 433.21 | I63.219         |
| Cerebral infarction due to occlusion of vertebral artery, unspecified blood vessel laterality            | 433.21 | I63.219         |
| Cerebrovascular accident (CVA) due to stenosis of vertebral artery, unspecified blood vessel laterality  | 433.21 | I63.219         |
| Cerebrovascular accident (CVA) due to occlusion of vertebral artery, unspecified blood vessel laterality | 433.21 | I63.219         |
| Cerebral infarction due to unspecified occlusion or stenosis of unspecified vertebral artery             |        | I63.219         |
| Arterial ischemic stroke, vertebrobasilar, brainstem, acute                                              | 434.91 | I63.219, I63.22 |
| Acute arterial ischemic stroke, vertebrobasilar, brainstem                                               | 434.91 | I63.219, I63.22 |
| Arterial ischemic stroke, vertebrobasilar, thalamic, acute                                               | 434.91 | I63.219, I63.22 |
| Acute arterial ischemic stroke, vertebrobasilar, thalamic                                                | 434.91 | I63.219, I63.22 |
| Acute ischemic vertebrobasilar artery brainstem stroke                                                   | 434.91 | I63.219, I63.22 |
| Acute ischemic vertebrobasilar artery thalamic stroke                                                    | 434.91 | I63.219, I63.22 |
| Acute ischemic VBA brainstem stroke                                                                      | 434.91 | I63.219, I63.22 |
| Acute ischemic VBA thalamic stroke                                                                       | 434.91 | I63.219, I63.22 |
| Arterial ischemic stroke, vertebrobasilar, thalamic, acute, unspecified laterality                       | 434.91 | I63.219, I63.22 |
| Acute arterial ischemic stroke, vertebrobasilar, thalamic, unspecified laterality                        | 434.91 | I63.219, I63.22 |
| Arterial ischemic stroke, vertebrobasilar, brainstem, acute, unspecified laterality                      | 434.91 | I63.219, I63.22 |

|                                                                                    |        |                 |
|------------------------------------------------------------------------------------|--------|-----------------|
| Acute ischemic vertebrobasilar artery thalamic stroke, unspecified laterality      | 434.91 | I63.219, I63.22 |
| Acute ischemic VBA brainstem stroke, unspecified laterality                        | 434.91 | I63.219, I63.22 |
| Acute arterial ischemic stroke, vertebrobasilar, brainstem, unspecified laterality | 434.91 | I63.219, I63.22 |
| Acute ischemic VBA thalamic stroke, unspecified laterality                         | 434.91 | I63.219, I63.22 |
| Acute ischemic vertebrobasilar artery brainstem stroke, unspecified laterality     | 434.91 | I63.219, I63.22 |
| Occlusion and stenosis of basilar artery with cerebral infarction                  | 433.01 | I63.22          |
| Occlusion and stenosis of basilar artery, with cerebral infarction                 | 433.01 | I63.22          |
| Basilar artery stenosis/occlusion with infarction                                  | 433.01 | I63.22          |
| Basilar artery stenosis with infarction                                            | 433.01 | I63.22          |
| Cerebral infrc due to unsp occls or stenosis of basilar art                        | 433.01 | I63.22          |
| Basilar artery occlusion with cerebral infarction                                  | 433.01 | I63.22          |
| Cerebral infarction due to basilar artery occlusion                                | 433.01 | I63.22          |
| Cerebral infarction due to stenosis of basilar artery                              | 433.01 | I63.22          |
| Cerebral infarction involving basilar artery                                       | 433.01 | I63.22          |
| Stroke due to occlusion of basilar artery                                          | 433.01 | I63.22          |
| Cerebrovascular accident (CVA) due to occlusion of basilar artery                  | 433.01 | I63.22          |
| Stroke due to stenosis of basilar artery                                           | 433.01 | I63.22          |
| Cerebrovascular accident (CVA) due to stenosis of basilar artery                   | 433.01 | I63.22          |
| Cerebral infarction due to unspecified occlusion or stenosis of basilar arteries   | 433.01 | I63.22          |
| Cerebral infarction due to unspecified occlusion or stenosis of basilar artery     | 433.01 | I63.22          |

|                                                                                       |        |         |
|---------------------------------------------------------------------------------------|--------|---------|
| Cerebral infarction due to unspecified occlusion or stenosis of basilar artery (CODE) | 433.01 | I63.22  |
| Cerebral infarction due to unspecified occlusion or stenosis of basilar artery        |        | I63.22  |
| Cerebral infarction due to unspecified occlusion or stenosis of carotid arteries      |        | I63.23  |
| Arterial ischemic stroke, ICA (internal carotid artery), right, acute                 | 434.91 | I63.231 |
| Acute right arterial ischemic stroke, ICA (internal carotid artery)                   | 434.91 | I63.231 |
| Acute ischemic right ICA stroke                                                       | 434.91 | I63.231 |
| Arterial ischemic stroke, ICA, right, acute                                           | 434.91 | I63.231 |
| Acute right arterial ischemic stroke, internal carotid artery (ICA)                   | 434.91 | I63.231 |
| Acute ischemic right internal carotid artery (ICA) stroke                             | 434.91 | I63.231 |
| Cerebral infarction due to internal carotid artery occlusion, right                   | 433.11 | I63.231 |
| Stenosis of internal carotid artery with cerebral infarction, right                   | 433.11 | I63.231 |
| Cerebral infarction due to occlusion of right internal carotid artery                 | 433.11 | I63.231 |
| Stenosis of right internal carotid artery with cerebral infarction                    | 433.11 | I63.231 |
| Cerebral infarction involving right carotid artery                                    | 433.11 | I63.231 |
| Cerebral infarction due to stenosis of right carotid artery                           | 433.11 | I63.231 |
| Cerebral infarction due to occlusion of right carotid artery                          | 433.11 | I63.231 |
| Cerebral infarction due to vascular stenosis, right                                   | 433.11 | I63.231 |
| Cerebral infarction due to vascular occlusion, right                                  | 433.11 | I63.231 |
| Cerebral infarction involving carotid artery, right                                   | 433.11 | I63.231 |

|                                                                                        |        |         |
|----------------------------------------------------------------------------------------|--------|---------|
| Stroke due to stenosis of right carotid artery                                         | 433.11 | I63.231 |
| Cerebrovascular accident (CVA) due to stenosis of right carotid artery                 | 433.11 | I63.231 |
| Cerebrovascular accident (CVA) due to occlusion of right carotid artery                | 433.11 | I63.231 |
| Stroke due to occlusion of right carotid artery                                        | 433.11 | I63.231 |
| Cerebral infarction due to unspecified occlusion or stenosis of right carotid arteries | 433.11 | I63.231 |
| Cereb infrc due to unsp occls or stenosis of right carotid art                         | 433.11 | I63.231 |
| Cerebral infarction due to unspecified occlusion or stenosis of right carotid arteries |        | I63.231 |
| Arterial ischemic stroke, ICA (internal carotid artery), left, acute                   | 434.91 | I63.232 |
| Acute left arterial ischemic stroke, ICA (internal carotid artery)                     | 434.91 | I63.232 |
| Acute ischemic left ICA stroke                                                         | 434.91 | I63.232 |
| Arterial ischemic stroke, ICA, left, acute                                             | 434.91 | I63.232 |
| Acute left ICA ischemic stroke                                                         | 434.91 | I63.232 |
| Acute ischemic left internal carotid artery (ICA) stroke                               | 434.91 | I63.232 |
| Cerebral infarction due to internal carotid artery occlusion, left                     | 433.11 | I63.232 |
| Stenosis of internal carotid artery with cerebral infarction, left                     | 433.11 | I63.232 |
| Cerebral infarction due to occlusion of left internal carotid artery                   | 433.11 | I63.232 |
| Stenosis of left internal carotid artery with cerebral infarction                      | 433.11 | I63.232 |
| Cerebral infarction involving left carotid artery                                      | 433.11 | I63.232 |
| Cerebral infarction due to stenosis of left carotid artery                             | 433.11 | I63.232 |

|                                                                                            |        |         |
|--------------------------------------------------------------------------------------------|--------|---------|
| Cerebral infarction due to occlusion of left carotid artery                                | 433.11 | I63.232 |
| Cerebral infarction due to vascular stenosis, left                                         | 433.11 | I63.232 |
| Cerebral infarction involving carotid artery, left                                         | 433.11 | I63.232 |
| Cerebral infarction due to vascular occlusion, left                                        | 433.11 | I63.232 |
| Stroke due to occlusion of left carotid artery                                             | 433.11 | I63.232 |
| Cerebrovascular accident (CVA) due to occlusion of left carotid artery                     | 433.11 | I63.232 |
| Stroke due to stenosis of left carotid artery                                              | 433.11 | I63.232 |
| Cerebrovascular accident (CVA) due to stenosis of left carotid artery                      | 433.11 | I63.232 |
| Cerebral infarction due to unspecified occlusion or stenosis of left carotid arteries      | 433.11 | I63.232 |
| Cereb infrc due to unsp occls or stenosis of left carotid art                              | 433.11 | I63.232 |
| Cerebral infarction due to unspecified occlusion or stenosis of left carotid arteries      |        | I63.232 |
| Cerebral infarction due to bilateral stenosis of carotid arteries                          | 433.31 | I63.233 |
| Cerebral infarction due to bilateral occlusion of carotid arteries                         | 433.31 | I63.233 |
| Cerebrovascular accident (CVA) due to bilateral occlusion of carotid arteries              | 433.31 | I63.233 |
| Cerebrovascular accident (CVA) due to bilateral stenosis of carotid arteries               | 433.31 | I63.233 |
| Cerebral infarction due to unspecified occlusion or stenosis of bilateral carotid arteries | 433.11 | I63.233 |
| Cerebral infarction due to unspecified occlusion or stenosis of bilateral carotid arteries |        | I63.233 |

|                                                                                      |        |         |
|--------------------------------------------------------------------------------------|--------|---------|
| Occlusion and stenosis of carotid artery with cerebral infarction                    | 433.11 | 163.239 |
| Occlusion and stenosis of carotid artery, with cerebral infarction                   | 433.11 | 163.239 |
| Symptomatic carotid artery stenosis with infarction                                  | 433.11 | 163.239 |
| Asymptomatic carotid artery stenosis with infarction                                 | 433.11 | 163.239 |
| Carotid artery stenosis/occlusion with infarction                                    | 433.11 | 163.239 |
| Carotid artery occlusion with infarction                                             | 433.11 | 163.239 |
| Carotid stenosis, symptomatic, with infarction                                       | 433.11 | 163.239 |
| Carotid artery occlusion with cerebral infarction                                    | 433.11 | 163.239 |
| Cereb infrc due to unsp occls or stenosis of unsp carotid art                        | 433.11 | 163.239 |
| Cerebral infarction due to internal carotid artery occlusion                         | 433.11 | 163.239 |
| Cerebral infarction due to internal carotid artery occlusion, unspecified laterality | 433.11 | 163.239 |
| Stenosis of internal carotid artery with cerebral infarction                         | 433.11 | 163.239 |
| Stenosis of internal carotid artery with cerebral infarction, unspecified laterality | 433.11 | 163.239 |
| Cerebral infarction involving carotid artery                                         | 433.11 | 163.239 |
| Cerebral infarction due to carotid artery occlusion                                  | 433.11 | 163.239 |
| Cerebral infarction due to stenosis of carotid artery                                | 433.11 | 163.239 |
| Cerebral infarction due to carotid artery stenosis                                   | 433.11 | 163.239 |
| Carotid artery stenosis with cerebral infarction                                     | 433.11 | 163.239 |
| Cerebral infarction due to vascular stenosis, unspecified laterality                 | 433.11 | 163.239 |

|                                                                                                        |        |         |
|--------------------------------------------------------------------------------------------------------|--------|---------|
| Cerebral infarction due to vascular occlusion, unspecified laterality                                  | 433.11 | 163.239 |
| Cerebral infarction involving carotid artery, unspecified laterality                                   | 433.11 | 163.239 |
| Cerebral infarction due to occlusion of carotid artery                                                 | 433.11 | 163.239 |
| Stroke due to stenosis of carotid artery                                                               | 433.11 | 163.239 |
| Cerebrovascular accident (CVA) due to occlusion of carotid artery                                      | 433.11 | 163.239 |
| Stroke due to occlusion of carotid artery                                                              | 433.11 | 163.239 |
| Cerebrovascular accident (CVA) due to stenosis of carotid artery                                       | 433.11 | 163.239 |
| Cerebral infarction due to unspecified occlusion or stenosis of unspecified carotid arteries           | 433.11 | 163.239 |
| Cerebrovascular accident (CVA) due to occlusion of carotid artery, unspecified blood vessel laterality | 433.11 | 163.239 |
| Cerebral infarction due to occlusion of carotid artery, unspecified blood vessel laterality            | 433.11 | 163.239 |
| Cerebral infarction due to carotid artery stenosis, unspecified blood vessel laterality                | 433.11 | 163.239 |
| Cerebrovascular accident (CVA) due to stenosis of carotid artery, unspecified blood vessel laterality  | 433.11 | 163.239 |
| Cerebral infarction due to unspecified occlusion or stenosis of unspecified carotid artery             |        | 163.239 |
| Arterial ischemic stroke, vertebrobasilar, cerebellar, acute                                           | 434.91 | 163.29  |
| Acute arterial ischemic stroke, vertebrobasilar, cerebellar                                            | 434.91 | 163.29  |
| Acute ischemic vertebrobasilar artery cerebellar stroke                                                | 434.91 | 163.29  |
| Ac ischemic VBA cerebellar stroke                                                                      | 434.91 | 163.29  |

|                                                                                            |        |        |
|--------------------------------------------------------------------------------------------|--------|--------|
| Occlusion of anterior choroidal artery with cerebral infarction                            | 433.81 | I63.29 |
| Cerebral infarction due to stenosis of other precerebral artery                            | 433.91 | I63.29 |
| Cerebral infarction due to occlusion of other precerebral artery                           | 433.81 | I63.29 |
| Cerebral infarction due to unspecified occlusion or stenosis of other precerebral arteries | 433.81 | I63.29 |
| Cerebrovascular accident (CVA) due to stenosis of other precerebral artery                 | 433.81 | I63.29 |
| Cerebrovascular accident (CVA) due to occlusion of other precerebral artery                | 433.81 | I63.29 |
| Cerebral infrc due to unsp occls or stenosis of precerb art                                | 433.81 | I63.29 |
| Cerebral infarction due to unspecified occlusion or stenosis of other precerebral arteries |        | I63.29 |
| Cerebral infarction due to thrombosis of cerebral arteries                                 |        | I63.3  |
| Cerebral thrombosis with cerebral infarction                                               | 434.01 | I63.30 |
| Cerebral infarction due to thrombosis of cerebral artery                                   | 434.01 | I63.30 |
| Thrombotic stroke involving cerebral artery                                                | 434.01 | I63.30 |
| Thrombotic cerebral infarction                                                             | 434.01 | I63.30 |
| Cerebral infarction due to cerebral venous thrombosis                                      | 434.01 | I63.30 |
| Cerebral infarction due to thrombosis of right cerebral artery                             | 434.01 | I63.30 |
| Cerebral infarction due to thrombosis of left cerebral artery                              | 434.01 | I63.30 |
| Stroke due to thrombosis of cerebral artery                                                | 434.01 | I63.30 |
| Cerebrovascular accident (CVA) due to thrombosis of cerebral artery                        | 434.01 | I63.30 |



|                                                                                  |        |         |
|----------------------------------------------------------------------------------|--------|---------|
| Cerebral infarction due to thrombosis of unspecified cerebral artery             | 434.01 | I63.30  |
| Cerebral infarction due to thrombosis                                            | 434.01 | I63.30  |
| Cerebral infarction due to thrombosis of unspecified cerebral artery             |        | I63.30  |
| Cerebral infarction due to thrombosis of middle cerebral artery                  |        | I63.31  |
| Cerebral infarction due to thrombosis of right middle cerebral artery            | 434.01 | I63.311 |
| Thrombotic stroke involving right middle cerebral artery                         | 434.01 | I63.311 |
| Cerebral infarction due to thrombosis of middle cerebral artery, right           | 434.01 | I63.311 |
| Thrombotic stroke involving middle cerebral artery, right                        | 434.01 | I63.311 |
| Stroke due to thrombosis of right middle cerebral artery                         | 434.01 | I63.311 |
| Cerebrovascular accident (CVA) due to thrombosis of right middle cerebral artery | 434.01 | I63.311 |
| Cerebral infarction due to thrombosis of right middle cerebral artery            |        | I63.311 |
| Cerebral infarction due to thrombosis of left middle cerebral artery             | 434.01 | I63.312 |
| Thrombotic stroke involving left middle cerebral artery                          | 434.01 | I63.312 |
| Cerebral infarction due to thrombosis of middle cerebral artery, left            | 434.01 | I63.312 |
| Thrombotic stroke involving middle cerebral artery, left                         | 434.01 | I63.312 |
| Stroke due to thrombosis of left middle cerebral artery                          | 434.01 | I63.312 |
| Cerebrovascular accident (CVA) due to thrombosis of left middle cerebral artery  | 434.01 | I63.312 |
| Cerebral infarction due to thrombosis of left middle cerebral artery             |        | I63.312 |
| Cerebral infarction due to bilateral thrombosis of middle cerebral arteries      | 434.01 | I63.313 |

|                                                                                                                 |        |         |
|-----------------------------------------------------------------------------------------------------------------|--------|---------|
| Cerebrovascular accident (CVA) due to bilateral thrombosis of middle cerebral arteries                          | 434.01 | I63.313 |
| Cerebral infarction due to thrombosis of bilateral middle cerebral arteries                                     | 434.01 | I63.313 |
| Cerebral infarction due to thrombosis of bilateral middle cerebral arteries                                     |        | I63.313 |
| Cerebral infarction due to thrombosis of middle cerebral artery                                                 | 434.01 | I63.319 |
| Thrombotic stroke involving middle cerebral artery                                                              | 434.01 | I63.319 |
| Thrombotic stroke involving middle cerebral artery, unspecified laterality                                      | 434.01 | I63.319 |
| Cerebral infarction due to thrombosis of middle cerebral artery, unspecified laterality                         | 434.01 | I63.319 |
| Cerebrovascular accident (CVA) due to thrombosis of middle cerebral artery                                      | 434.01 | I63.319 |
| Stroke due to thrombosis of middle cerebral artery                                                              | 434.01 | I63.319 |
| Cerebral infarction due to thrombosis of unspecified middle cerebral artery                                     | 434.01 | I63.319 |
| Cerebral infarction due to thrombosis of middle cerebral artery, unspecified blood vessel laterality            | 434.01 | I63.319 |
| Cerebrovascular accident (CVA) due to thrombosis of middle cerebral artery, unspecified blood vessel laterality | 434.01 | I63.319 |
| Cerebral infrc due to thombos unsp middle cerebral artery                                                       | 434.01 | I63.319 |
| Cerebral infarction due to thrombosis of unspecified middle cerebral artery                                     |        | I63.319 |
| Cerebral infarction due to thrombosis of anterior cerebral artery                                               |        | I63.32  |
| Thrombotic stroke involving right anterior cerebral artery                                                      | 434.01 | I63.321 |

|                                                                                          |        |         |
|------------------------------------------------------------------------------------------|--------|---------|
| Cerebral infarction due to thrombosis of right anterior cerebral artery                  | 434.01 | I63.321 |
| Thrombotic stroke involving anterior cerebral artery, right                              | 434.01 | I63.321 |
| Cerebral infarction due to thrombosis of anterior cerebral artery, right                 | 434.01 | I63.321 |
| Stroke due to thrombosis of right anterior cerebral artery                               | 434.01 | I63.321 |
| Cerebrovascular accident (CVA) due to thrombosis of right anterior cerebral artery       | 434.01 | I63.321 |
| Cerebral infrc due to thombos of right ant cerebral artery                               | 434.01 | I63.321 |
| Cerebral infarction due to thrombosis of right anterior cerebral artery                  |        | I63.321 |
| Cerebral infarction due to thrombosis of left anterior cerebral artery                   | 434.01 | I63.322 |
| Thrombotic stroke involving left anterior cerebral artery                                | 434.01 | I63.322 |
| Thrombotic stroke involving anterior cerebral artery, left                               | 434.01 | I63.322 |
| Cerebral infarction due to thrombosis of anterior cerebral artery, left                  | 434.01 | I63.322 |
| Cerebrovascular accident (CVA) due to thrombosis of left anterior cerebral artery        | 434.01 | I63.322 |
| Stroke due to thrombosis of left anterior cerebral artery                                | 434.01 | I63.322 |
| Cerebral infarction due to thrombosis of left anterior cerebral artery                   |        | I63.322 |
| Cerebral infarction due to bilateral thrombosis of anterior cerebral arteries            | 434.01 | I63.323 |
| Cerebrovascular accident (CVA) due to bilateral thrombosis of anterior cerebral arteries | 434.01 | I63.323 |
| Cerebral infarction due to thrombosis of bilateral anterior arteries                     | 434.01 | I63.323 |

|                                                                                                                   |        |         |
|-------------------------------------------------------------------------------------------------------------------|--------|---------|
| Cerebral infarction due to thrombosis of bilateral anterior cerebral arteries                                     | 434.01 | I63.323 |
| Cerebral infarction due to thrombosis of bilateral anterior cerebral arteries                                     |        | I63.323 |
| Cerebral infarction due to thrombosis of anterior cerebral artery                                                 | 434.01 | I63.329 |
| Thrombotic stroke involving anterior cerebral artery                                                              | 434.01 | I63.329 |
| Thrombotic stroke involving anterior cerebral artery, unspecified laterality                                      | 434.01 | I63.329 |
| Cerebral infarction due to thrombosis of anterior cerebral artery, unspecified laterality                         | 434.01 | I63.329 |
| Stroke due to thrombosis of anterior cerebral artery                                                              | 434.01 | I63.329 |
| Cerebrovascular accident (CVA) due to thrombosis of anterior cerebral artery                                      | 434.01 | I63.329 |
| Cerebral infarction due to thrombosis of unspecified anterior cerebral artery                                     | 434.01 | I63.329 |
| Cerebrovascular accident (CVA) due to thrombosis of anterior cerebral artery, unspecified blood vessel laterality | 434.01 | I63.329 |
| Cerebral infarction due to thrombosis of anterior cerebral artery, unspecified blood vessel laterality            | 434.01 | I63.329 |
| Cerebral infrc due to thombos unsp anterior cerebral artery                                                       | 434.01 | I63.329 |
| Cerebral infarction due to thrombosis of unspecified anterior cerebral artery                                     |        | I63.329 |
| Cerebral infarction due to thrombosis of posterior cerebral artery                                                |        | I63.33  |
| Thrombotic stroke involving right posterior cerebral artery                                                       | 434.01 | I63.331 |
| Cerebral infarction due to thrombosis of right posterior cerebral artery                                          | 434.01 | I63.331 |
| Cerebral infarction due to thrombosis of posterior cerebral artery, right                                         | 434.01 | I63.331 |

|                                                                                           |        |         |
|-------------------------------------------------------------------------------------------|--------|---------|
| Thrombotic stroke involving posterior cerebral artery, right                              | 434.01 | I63.331 |
| Stroke due to thrombosis of right posterior cerebral artery                               | 434.01 | I63.331 |
| Cerebrovascular accident (CVA) due to thrombosis of right posterior cerebral artery       | 434.01 | I63.331 |
| Cerebral infrc due to thombos of right post cerebral artery                               | 434.01 | I63.331 |
| Cerebral infarction due to thrombosis of right posterior cerebral artery                  |        | I63.331 |
| Thrombotic stroke involving left posterior cerebral artery                                | 434.01 | I63.332 |
| Cerebral infarction due to thrombosis of left posterior cerebral artery                   | 434.01 | I63.332 |
| Thrombotic stroke involving posterior cerebral artery, left                               | 434.01 | I63.332 |
| Cerebral infarction due to thrombosis of posterior cerebral artery, left                  | 434.01 | I63.332 |
| Cerebrovascular accident (CVA) due to thrombosis of left posterior cerebral artery        | 434.01 | I63.332 |
| Stroke due to thrombosis of left posterior cerebral artery                                | 434.01 | I63.332 |
| Cerebral infrc due to thombos of left post cerebral artery                                | 434.01 | I63.332 |
| Cerebral infarction due to thrombosis of left posterior cerebral artery                   |        | I63.332 |
| Cerebral infarction due to bilateral thrombosis of posterior cerebral arteries            | 434.01 | I63.333 |
| Cerebrovascular accident (CVA) due to bilateral thrombosis of posterior cerebral arteries | 434.01 | I63.333 |
| Cerebral infarction to thrombosis of bilateral posterior arteries                         | 434.01 | I63.333 |
| Cerebral infarction to thrombosis of bilateral posterior cerebral arteries                | 434.01 | I63.333 |

|                                                                                                                    |        |         |
|--------------------------------------------------------------------------------------------------------------------|--------|---------|
| Cerebral infarction due to thrombosis of bilateral posterior cerebral arteries                                     |        | 163.333 |
| Cerebral infarction due to thrombosis of posterior cerebral artery                                                 | 434.01 | 163.339 |
| Thrombotic stroke involving posterior cerebral artery                                                              | 434.01 | 163.339 |
| Cerebral infarction due to thrombosis of posterior cerebral artery, unspecified laterality                         | 434.01 | 163.339 |
| Thrombotic stroke involving posterior cerebral artery, unspecified laterality                                      | 434.01 | 163.339 |
| Stroke due to thrombosis of posterior cerebral artery                                                              | 434.01 | 163.339 |
| Cerebrovascular accident (CVA) due to thrombosis of posterior cerebral artery                                      | 434.01 | 163.339 |
| Cerebral infarction due to thrombosis of unspecified posterior cerebral artery                                     | 434.01 | 163.339 |
| Cerebrovascular accident (CVA) due to thrombosis of posterior cerebral artery, unspecified blood vessel laterality | 434.01 | 163.339 |
| Cerebral infarction due to thrombosis of posterior cerebral artery, unspecified blood vessel laterality            | 434.01 | 163.339 |
| Cerebral infrc due to thombos unsp posterior cerebral artery                                                       | 434.01 | 163.339 |
| Cerebral infarction due to thrombosis of unspecified posterior cerebral artery                                     |        | 163.339 |
| Cerebral infarction due to thrombosis of cerebellar artery                                                         |        | 163.34  |
| Cerebral infarction due to thrombosis of right cerebellar artery                                                   | 434.01 | 163.341 |
| Thrombotic stroke involving right cerebellar artery                                                                | 434.01 | 163.341 |
| Cerebral infarction due to thrombosis of cerebellar artery, right                                                  | 434.01 | 163.341 |
| Thrombotic stroke involving cerebellar artery, right                                                               | 434.01 | 163.341 |

|                                                                                    |        |         |
|------------------------------------------------------------------------------------|--------|---------|
| Cerebrovascular accident (CVA) due to thrombosis of right cerebellar artery        | 434.01 | 163.341 |
| Stroke due to thrombosis of right cerebellar artery                                | 434.01 | 163.341 |
| Cerebral infarction due to thrombosis of right cerebellar artery                   |        | 163.341 |
| Cerebral infarction due to thrombosis of left cerebellar artery                    | 434.01 | 163.342 |
| Thrombotic stroke involving left cerebellar artery                                 | 434.01 | 163.342 |
| Cerebral infarction due to thrombosis of cerebellar artery, left                   | 434.01 | 163.342 |
| Thrombotic stroke involving cerebellar artery, left                                | 434.01 | 163.342 |
| Stroke due to thrombosis of left cerebellar artery                                 | 434.01 | 163.342 |
| Cerebrovascular accident (CVA) due to thrombosis of left cerebellar artery         | 434.01 | 163.342 |
| Cerebral infarction due to thrombosis of left cerebellar artery                    |        | 163.342 |
| Cerebrovascular accident (CVA) due to bilateral thrombosis of cerebellar arteries  | 434.01 | 163.343 |
| Infarction of brain due to bilateral thrombosis of cerebellar arteries             | 434.01 | 163.343 |
| Cerebral infarction to thrombosis of bilateral cerebellar arteries                 | 434.01 | 163.343 |
| Cerebral infarction due to thrombosis of bilateral cerebellar arteries             |        | 163.343 |
| Cerebral infarction due to thrombosis of cerebellar artery                         | 434.01 | 163.349 |
| Thrombotic stroke involving cerebellar artery                                      | 434.01 | 163.349 |
| Cerebral infarction due to thrombosis of cerebellar artery, unspecified laterality | 434.01 | 163.349 |
| Thrombotic stroke involving cerebellar artery, unspecified laterality              | 434.01 | 163.349 |

|                                                                                                            |        |         |
|------------------------------------------------------------------------------------------------------------|--------|---------|
| Stroke due to thrombosis of cerebellar artery                                                              | 434.01 | 163.349 |
| Cerebrovascular accident (CVA) due to thrombosis of cerebellar artery                                      | 434.01 | 163.349 |
| Cerebral infarction due to thrombosis of unspecified cerebellar artery                                     | 434.01 | 163.349 |
| Cerebral infarction due to thrombosis of cerebellar artery, unspecified blood vessel laterality            | 434.01 | 163.349 |
| Cerebrovascular accident (CVA) due to thrombosis of cerebellar artery, unspecified blood vessel laterality | 434.01 | 163.349 |
| Cerebral infarction due to thrombosis of unspecified cerebellar artery                                     |        | 163.349 |
| Cerebral infarction due to thrombosis of other cerebral artery                                             | 434.01 | 163.39  |
| Cerebrovascular accident (CVA) due to thrombosis of other cerebral artery                                  | 434.01 | 163.39  |
| Cerebral infarction due to thrombosis of other cerebral artery                                             |        | 163.39  |
| Cerebral infarction due to embolism of cerebral artery                                                     | 434.11 | 163.40  |
| Cerebral infarction due to unspecified occlusion or stenosis of cerebral arteries                          |        | 163.5   |
| Unspecified cerebral artery occlusion with cerebral infarction                                             | 434.91 | 163.50  |
| Stroke-in-evolution syndrome                                                                               | 434.91 | 163.50  |
| Cerebral artery occlusion with cerebral infarction                                                         | 434.91 | 163.50  |
| Encephalomalacia with cerebral infarction                                                                  | 434.91 | 163.50  |
| Right pontine cerebrovascular accident                                                                     | 434.91 | 163.50  |
| Right pontine stroke                                                                                       | 434.91 | 163.50  |
| Right pontine CVA                                                                                          | 434.91 | 163.50  |
| Cerebrovascular accident of right pontine structure                                                        | 434.91 | 163.50  |
| Occlusion or stenosis of multiple cerebral arteries with cerebral infarction                               | 434.91 | 163.50  |



|                                                                                             |        |        |
|---------------------------------------------------------------------------------------------|--------|--------|
| Cerebral infarction due to occlusion or stenosis of multiple cerebral arteries              | 434.91 | I63.50 |
| Cerebrovascular accident due to cerebral artery occlusion                                   | 434.91 | I63.50 |
| Cerebrovascular accident of left pontine structure                                          | 434.91 | I63.50 |
| Left pontine CVA                                                                            | 434.91 | I63.50 |
| Left pontine cerebrovascular accident                                                       | 434.91 | I63.50 |
| Left pontine stroke                                                                         | 434.91 | I63.50 |
| Cerebral infarction due to cerebral artery occlusion                                        | 434.91 | I63.50 |
| Posterior circulation stroke                                                                | 434.91 | I63.50 |
| Cerebrovascular accident involving posterior circulation                                    | 434.91 | I63.50 |
| Occlusion of intracranial artery with cerebral infarction                                   | 434.91 | I63.50 |
| Cerebral infarction due to stenosis of cerebral artery                                      | 434.91 | I63.50 |
| Cerebrovascular accident (CVA) due to occlusion of cerebral artery                          | 434.91 | I63.50 |
| Cerebrovascular accident (CVA) due to stenosis of cerebral artery                           | 434.91 | I63.50 |
| Stroke due to stenosis of cerebral artery                                                   | 434.91 | I63.50 |
| Cerebrovascular accident (CVA) of left pontine structure                                    | 434.91 | I63.50 |
| Cerebrovascular accident (CVA) of right pontine structure                                   | 434.91 | I63.50 |
| Cerebrovascular accident (CVA) involving posterior circulation                              | 434.91 | I63.50 |
| Cerebral infarction due to unspecified occlusion or stenosis of unspecified cerebral artery | 434.91 | I63.50 |
| Cereb infrc due to unsp occls or stenosis of cerebral artery                                | 434.91 | I63.50 |
| Cereb infrc due to unsp occls or stenosis of unsp cereb artery                              | 434.91 | I63.50 |

|                                                                                             |        |         |
|---------------------------------------------------------------------------------------------|--------|---------|
| Cerebral infarction due to unspecified occlusion or stenosis of unspecified cerebral artery |        | I63.50  |
| Cerebral infarction due to unspecified occlusion or stenosis of middle cerebral artery      |        | I63.51  |
| Arterial ischemic stroke, MCA (middle cerebral artery), right, acute                        | 434.91 | I63.511 |
| Acute right arterial ischemic stroke, MCA (middle cerebral artery)                          | 434.91 | I63.511 |
| Acute ischemic right MCA stroke                                                             | 434.91 | I63.511 |
| Arterial ischemic stroke, MCA, right, acute                                                 | 434.91 | I63.511 |
| Acute right MCA stroke                                                                      | 434.91 | I63.511 |
| Right middle cerebral artery stroke                                                         | 434.91 | I63.511 |
| Cerebral infarct due to occlusion or stenosis middle cerebral artery, right                 | 434.91 | I63.511 |
| Cerebral infarction due to occlusion or stenosis of middle cerebral artery, right           | 434.91 | I63.511 |
| Acute right arterial ischemic stroke, middle cerebral artery (MCA)                          | 434.91 | I63.511 |
| Acute ischemic right middle cerebral artery (MCA) stroke                                    | 434.91 | I63.511 |
| Cerebral infarction due to occlusion of middle cerebral artery, right                       | 434.91 | I63.511 |
| Cerebral infarction due to occlusion of right middle cerebral artery                        | 434.91 | I63.511 |
| Cerebrovascular accident involving right middle cerebral artery territory                   | 434.91 | I63.511 |
| Cerebral infarction involving right middle cerebral artery                                  | 434.01 | I63.511 |
| Cerebral infarction due to stenosis of right middle cerebral artery                         | 434.91 | I63.511 |
| Cerebral infarction involving middle cerebral artery, right                                 | 434.01 | I63.511 |
| Cerebrovascular accident (CVA) due to stenosis of right middle cerebral artery              | 434.91 | I63.511 |

|                                                                                              |        |         |
|----------------------------------------------------------------------------------------------|--------|---------|
| Stroke due to occlusion of right middle cerebral artery                                      | 434.91 | I63.511 |
| Stroke due to stenosis of right middle cerebral artery                                       | 434.91 | I63.511 |
| Cerebrovascular accident (CVA) due to occlusion of right middle cerebral artery              | 434.91 | I63.511 |
| Cerebrovascular accident (CVA) involving right middle cerebral artery territory              | 434.91 | I63.511 |
| Cerebral infarction due to unspecified occlusion or stenosis of right middle cerebral artery | 434.91 | I63.511 |
| Cereb infrc d/t unsp occls or stenosis of right mid cereb art                                | 434.91 | I63.511 |
| Cerebral infarction due to unspecified occlusion or stenosis of right middle cerebral artery |        | I63.511 |
| Arterial ischemic stroke, MCA (middle cerebral artery), left, acute                          | 434.91 | I63.512 |
| Left acute arterial ischemic stroke, MCA (middle cerebral artery)                            | 434.91 | I63.512 |
| Acute ischemic left MCA stroke                                                               | 434.91 | I63.512 |
| Arterial ischemic stroke, MCA, left, acute                                                   | 434.91 | I63.512 |
| Left middle cerebral artery stroke                                                           | 434.91 | I63.512 |
| Cerebrovascular accident involving left middle cerebral artery territory                     | 434.91 | I63.512 |
| Cerebral infarction due to occlusion or stenosis of middle cerebral artery, left             | 434.91 | I63.512 |
| Cerebral infarct due to occlusion or stenosis middle cerebral artery, left                   | 434.91 | I63.512 |
| Acute ischemic left middle cerebral artery (MCA) stroke                                      | 434.91 | I63.512 |
| Cerebral infarction due to occlusion of middle cerebral artery, left                         | 434.91 | I63.512 |
| Cerebral infarction due to occlusion of left middle cerebral artery                          | 434.91 | I63.512 |
| Cerebral infarction involving left middle cerebral artery                                    | 434.01 | I63.512 |

|                                                                                             |        |         |
|---------------------------------------------------------------------------------------------|--------|---------|
| Cerebral infarction due to stenosis of left middle cerebral artery                          | 434.91 | I63.512 |
| Cerebral infarction involving middle cerebral artery, left                                  | 434.01 | I63.512 |
| Cerebrovascular accident (CVA) due to occlusion of left middle cerebral artery              | 434.91 | I63.512 |
| Stroke due to stenosis of left middle cerebral artery                                       | 434.91 | I63.512 |
| Stroke due to occlusion of left middle cerebral artery                                      | 434.91 | I63.512 |
| Cerebrovascular accident (CVA) due to stenosis of left middle cerebral artery               | 434.91 | I63.512 |
| Cerebrovascular accident (CVA) involving left middle cerebral artery territory              | 434.91 | I63.512 |
| Cerebral infarction due to unspecified occlusion or stenosis of left middle cerebral artery | 434.91 | I63.512 |
| Cereb infrc d/t unsp occls or stenosis of left mid cereb art                                | 434.91 | I63.512 |
| Cerebral infarction due to unspecified occlusion or stenosis of left middle cerebral artery |        | I63.512 |
| Cerebral infarction due to bilateral stenosis of middle cerebral arteries                   | 434.91 | I63.513 |
| Cerebral infarction due to bilateral occlusion of middle cerebral arteries                  | 434.91 | I63.513 |
| Cerebrovascular accident (CVA) due to bilateral stenosis of middle cerebral arteries        | 434.91 | I63.513 |
| Cerebrovascular accident (CVA) due to bilateral occlusion of middle cerebral arteries       | 434.91 | I63.513 |
| Cerebral infarction due to unspecified occlusion or stenosis of bilateral middle arteries   | 434.91 | I63.513 |

|                                                                                                           |        |         |
|-----------------------------------------------------------------------------------------------------------|--------|---------|
| Cerebral infarction due to unspecified occlusion or stenosis of bilateral middle cerebral arteries        | 434.91 | I63.513 |
| Cerebral infarction due to unspecified occlusion or stenosis of bilateral middle cerebral arteries (CODE) | 434.91 | I63.513 |
| Cerebral infarction due to unspecified occlusion or stenosis of bilateral middle cerebral arteries        |        | I63.513 |
| Cerebral infarct due to occlusion or stenosis middle cerebral artery                                      | 434.91 | I63.519 |
| Cerebral infarction due to occlusion or stenosis of middle cerebral artery                                | 434.91 | I63.519 |
| Cerebral infarct due to occlusion or stenosis middle cerebral artery, unspecified laterality              | 434.91 | I63.519 |
| Cerebral infarction due to occlusion or stenosis of middle cerebral artery, unspecified laterality        | 434.91 | I63.519 |
| Cerebral infarction due to occlusion of middle cerebral artery                                            | 434.91 | I63.519 |
| Cerebral infarction due to occlusion of middle cerebral artery, unspecified laterality                    | 434.91 | I63.519 |
| Cerebral infarction involving middle cerebral artery                                                      | 434.01 | I63.519 |
| Cerebral infarction due to stenosis of middle cerebral artery                                             | 434.91 | I63.519 |
| Cerebral infarction involving middle cerebral artery, unspecified laterality                              | 434.01 | I63.519 |
| Cerebrovascular accident (CVA) due to occlusion of middle cerebral artery                                 | 434.91 | I63.519 |
| Stroke due to stenosis of middle cerebral artery                                                          | 434.91 | I63.519 |
| Stroke due to occlusion of middle cerebral artery                                                         | 434.91 | I63.519 |

|                                                                                                                |        |         |
|----------------------------------------------------------------------------------------------------------------|--------|---------|
| Cerebrovascular accident (CVA) due to stenosis of middle cerebral artery                                       | 434.91 | I63.519 |
| Cerebral infarction due to unspecified occlusion or stenosis of unspecified middle cerebral artery             | 434.91 | I63.519 |
| Cerebrovascular accident (CVA) due to stenosis of middle cerebral artery, unspecified blood vessel laterality  | 434.91 | I63.519 |
| Cerebral infarction due to stenosis of middle cerebral artery, unspecified blood vessel laterality             | 434.91 | I63.519 |
| Cerebral infarction due to occlusion of middle cerebral artery, unspecified blood vessel laterality            | 434.91 | I63.519 |
| Cerebrovascular accident (CVA) due to occlusion of middle cerebral artery, unspecified blood vessel laterality | 434.91 | I63.519 |
| Cereb infrc d/t unsp occls or stenosis of unsp mid cereb art                                                   | 434.91 | I63.519 |
| Cerebral infarction due to unspecified occlusion or stenosis of unspecified middle cerebral artery             |        | I63.519 |
| Cerebral infarction due to unspecified occlusion or stenosis of anterior cerebral artery                       |        | I63.52  |
| Arterial ischemic stroke, ACA (anterior cerebral artery), right, acute                                         | 434.91 | I63.521 |
| Acute right arterial ischemic stroke, ACA (anterior cerebral artery)                                           | 434.91 | I63.521 |
| Acute ischemic right ACA stroke                                                                                | 434.91 | I63.521 |
| Arterial ischemic stroke, ACA, right, acute                                                                    | 434.91 | I63.521 |
| Acute right ACA stroke                                                                                         | 434.91 | I63.521 |
| Cerebral infarction due to occlusion or stenosis of anterior cerebral artery, right                            | 434.91 | I63.521 |
| Acute ischemic multifocal anterior circulation stroke, right                                                   | 434.91 | I63.521 |
| Ac isch multifocal ant circ stroke, right                                                                      | 434.91 | I63.521 |

|                                                                                    |        |         |
|------------------------------------------------------------------------------------|--------|---------|
| Arterial ischemic stroke, multifocal, anterior circulation, acute, right           | 434.91 | I63.521 |
| Acute arterial ischemic stroke, multifocal, anterior circulation, right            | 434.91 | I63.521 |
| Acute right arterial ischemic stroke, anterior cerebral artery (ACA)               | 434.91 | I63.521 |
| Acute ischemic right anterior cerebral artery (ACA) stroke                         | 434.91 | I63.521 |
| Anterior cerebral circulation infarction, right                                    | 434.91 | I63.521 |
| Cerebral infarction due to anterior cerebral artery occlusion, right               | 434.91 | I63.521 |
| Cerebrovascular accident involving anterior circulation, right                     | 434.91 | I63.521 |
| Total anterior cerebral circulation infarction, right                              | 434.91 | I63.521 |
| Anterior circulation stroke, right                                                 | 434.91 | I63.521 |
| Partial anterior cerebral circulation infarction, right                            | 434.91 | I63.521 |
| Occlusion of recurrent artery of Huebner with cerebral infarction, right           | 434.91 | I63.521 |
| Cerebral infarction due to occlusion of right anterior cerebral artery             | 434.91 | I63.521 |
| Occlusion of right recurrent artery of Huebner with cerebral infarction            | 434.91 | I63.521 |
| Cerebrovascular accident involving anterior circulation of right side              | 434.91 | I63.521 |
| Total anterior cerebral circulation infarction of right side                       | 434.91 | I63.521 |
| Anterior cerebral circulation infarction involving right-sided vessel              | 434.91 | I63.521 |
| Right-sided partial anterior cerebral circulation infarction                       | 434.91 | I63.521 |
| Acute ischemic multifocal anterior circulation stroke involving right-sided vessel | 434.91 | I63.521 |

|                                                                                                |        |         |
|------------------------------------------------------------------------------------------------|--------|---------|
| Cerebral infarction involving right anterior cerebral artery                                   | 434.91 | I63.521 |
| Cerebral infarction due to stenosis of right anterior cerebral artery                          | 434.91 | I63.521 |
| Cerebral infarction involving anterior cerebral artery, right                                  | 434.91 | I63.521 |
| Cerebrovascular accident (CVA) due to occlusion of right anterior cerebral artery              | 434.91 | I63.521 |
| Stroke due to occlusion of right anterior cerebral artery                                      | 434.91 | I63.521 |
| Cerebrovascular accident (CVA) due to stenosis of right anterior cerebral artery               | 434.91 | I63.521 |
| Stroke due to stenosis of right anterior cerebral artery                                       | 434.91 | I63.521 |
| Cerebrovascular accident (CVA) involving anterior circulation of right side                    | 434.91 | I63.521 |
| Cerebral infarction due to unspecified occlusion or stenosis of right anterior cerebral artery | 434.91 | I63.521 |
| Right-sided anterior cerebral circulation infarction                                           | 434.91 | I63.521 |
| Acute ischemic multifocal right-sided anterior circulation stroke                              | 434.91 | I63.521 |
| Right-sided total anterior cerebral circulation infarction                                     | 434.91 | I63.521 |
| Cereb infrc d/t unsp occls or stenosis of right ant cereb art                                  | 434.91 | I63.521 |
| Cerebral infarction due to unspecified occlusion or stenosis of right anterior cerebral artery |        | I63.521 |
| Arterial ischemic stroke, ACA (anterior cerebral artery), left, acute                          | 434.91 | I63.522 |
| Acute left arterial ischemic stroke, ACA (anterior cerebral artery)                            | 434.91 | I63.522 |
| Acute ischemic left ACA stroke                                                                 | 434.91 | I63.522 |
| Arterial ischemic stroke, ACA, left, acute                                                     | 434.91 | I63.522 |
| Acute left ACA ischemic stroke                                                                 | 434.91 | I63.522 |



|                                                                                    |        |         |
|------------------------------------------------------------------------------------|--------|---------|
| Acute ischemic multifocal anterior circulation stroke, left                        | 434.91 | 163.522 |
| Arterial ischemic stroke, multifocal, anterior circulation, acute, left            | 434.91 | 163.522 |
| Acute arterial ischemic stroke, multifocal, anterior circulation, left             | 434.91 | 163.522 |
| Cerebral infarction due to occlusion or stenosis of anterior cerebral artery, left | 434.91 | 163.522 |
| Ac isch multifocal ant circ stroke, left                                           | 434.91 | 163.522 |
| Acute ischemic left anterior cerebral artery (ACA) stroke                          | 434.91 | 163.522 |
| Total anterior cerebral circulation infarction, left                               | 434.91 | 163.522 |
| Partial anterior cerebral circulation infarction, left                             | 434.91 | 163.522 |
| Cerebral infarction due to anterior cerebral artery occlusion, left                | 434.91 | 163.522 |
| Anterior circulation stroke, left                                                  | 434.91 | 163.522 |
| Anterior cerebral circulation infarction, left                                     | 434.91 | 163.522 |
| Cerebrovascular accident involving anterior circulation, left                      | 434.91 | 163.522 |
| Occlusion of recurrent artery of Huebner with cerebral infarction, left            | 434.91 | 163.522 |
| Cerebral infarction due to occlusion of left anterior cerebral artery              | 434.91 | 163.522 |
| Occlusion of left recurrent artery of Huebner with cerebral infarction             | 434.91 | 163.522 |
| Left-sided partial anterior cerebral circulation infarction                        | 434.91 | 163.522 |
| Total anterior cerebral circulation infarction of left side                        | 434.91 | 163.522 |
| Cerebrovascular accident involving anterior circulation of left side               | 434.91 | 163.522 |
| Acute ischemic multifocal anterior circulation stroke involving left-sided vessel  | 434.91 | 163.522 |

|                                                                                               |        |         |
|-----------------------------------------------------------------------------------------------|--------|---------|
| Anterior cerebral circulation infarction involving left-sided vessel                          | 434.91 | 163.522 |
| Cerebral infarction involving left anterior cerebral artery                                   | 434.91 | 163.522 |
| Cerebral infarction due to stenosis of left anterior cerebral artery                          | 434.91 | 163.522 |
| Cerebral infarction involving anterior cerebral artery, left                                  | 434.91 | 163.522 |
| Cerebrovascular accident (CVA) due to stenosis of left anterior cerebral artery               | 434.91 | 163.522 |
| Stroke due to stenosis of left anterior cerebral artery                                       | 434.91 | 163.522 |
| Cerebrovascular accident (CVA) due to occlusion of left anterior cerebral artery              | 434.91 | 163.522 |
| Stroke due to occlusion of left anterior cerebral artery                                      | 434.91 | 163.522 |
| Cerebrovascular accident (CVA) involving anterior circulation of left side                    | 434.91 | 163.522 |
| Cerebral infarction due to unspecified occlusion or stenosis of left anterior cerebral artery | 434.91 | 163.522 |
| Acute ischemic multifocal left-sided anterior circulation stroke                              | 434.91 | 163.522 |
| Left-sided total anterior cerebral circulation infarction                                     | 434.91 | 163.522 |
| Left-sided anterior cerebral circulation infarction                                           | 434.91 | 163.522 |
| Cereb infrc d/t unsp occls or stenosis of left ant cereb art                                  | 434.91 | 163.522 |
| Cerebral infarction due to unspecified occlusion or stenosis of left anterior cerebral artery |        | 163.522 |
| Cerebral infarction due to bilateral occlusion of anterior cerebral arteries                  | 434.91 | 163.523 |
| Cerebral infarction due to bilateral stenosis of anterior cerebral arteries                   | 434.91 | 163.523 |

|                                                                                                             |        |         |
|-------------------------------------------------------------------------------------------------------------|--------|---------|
| Cerebrovascular accident (CVA) due to bilateral stenosis of anterior cerebral arteries                      | 434.91 | I63.523 |
| Cerebral infarction due to unspecified occlusion or stenosis of bilateral anterior arteries                 | 434.91 | I63.523 |
| Cerebral infarction due to unspecified occlusion or stenosis of bilateral anterior cerebral arteries        | 434.91 | I63.523 |
| Cerebral infarction due to unspecified occlusion or stenosis of bilateral anterior cerebral arteries (CODE) | 434.91 | I63.523 |
| Cerebral infarction due to unspecified occlusion or stenosis of bilateral anterior cerebral arteries        |        | I63.523 |
| Arterial ischemic stroke, multifocal, anterior circulation, acute                                           | 434.91 | I63.529 |
| Acute arterial ischemic stroke, multifocal, anterior circulation                                            | 434.91 | I63.529 |
| Acute ischemic multifocal anterior circulation stroke                                                       | 434.91 | I63.529 |
| Ac isch multifocal ant circ stroke                                                                          | 434.91 | I63.529 |
| Cerebral infarct due to occlusion or stenosis anterior cerebral artery                                      | 434.91 | I63.529 |
| Cerebral infarction due to occlusion or stenosis of anterior cerebral artery                                | 434.91 | I63.529 |
| Ac isch multifocal ant circ stroke, unspecified laterality                                                  | 434.91 | I63.529 |
| Arterial ischemic stroke, multifocal, anterior circulation, acute, unspecified laterality                   | 434.91 | I63.529 |
| Acute ischemic multifocal anterior circulation stroke, unspecified laterality                               | 434.91 | I63.529 |
| Cerebral infarction due to occlusion or stenosis of anterior cerebral artery, unspecified laterality        | 434.91 | I63.529 |

|                                                                                           |         |         |
|-------------------------------------------------------------------------------------------|---------|---------|
| Acute arterial ischemic stroke, multifocal, anterior circulation, unspecified laterality  | 434.91  | 163.529 |
| Partial anterior cerebral circulation infarction                                          | 434.91  | 163.529 |
| Anterior cerebral circulation infarction                                                  | 434.91  | 163.529 |
| Total anterior cerebral circulation infarction                                            | 434.91  | 163.529 |
| Cerebral infarction due to anterior cerebral artery occlusion                             | 434.91  | 163.529 |
| Anterior circulation stroke                                                               | 434.91  | 163.529 |
| Cerebrovascular accident involving anterior circulation                                   | 434.91  | 163.529 |
| Cerebrovascular accident involving anterior circulation, unspecified laterality           | IM00001 | 163.529 |
| Partial anterior cerebral circulation infarction, unspecified laterality                  | 434.91  | 163.529 |
| Total anterior cerebral circulation infarction, unspecified laterality                    | 434.91  | 163.529 |
| Cerebral infarction due to anterior cerebral artery occlusion, unspecified laterality     | 434.91  | 163.529 |
| Anterior cerebral circulation infarction, unspecified laterality                          | 434.91  | 163.529 |
| Anterior circulation stroke, unspecified laterality                                       | IM00001 | 163.529 |
| Occlusion of recurrent artery of Huebner with cerebral infarction                         | 434.91  | 163.529 |
| Occlusion of recurrent artery of Huebner with cerebral infarction, unspecified laterality | 434.91  | 163.529 |
| Anterior circulation stroke of uncertain pathology                                        | 434.91  | 163.529 |
| Cerebral infarction involving anterior cerebral artery                                    | 434.91  | 163.529 |
| Cerebrovascular accident of uncertain pathology involving anterior circulation            | 434.91  | 163.529 |
| Cerebral infarction due to stenosis of anterior cerebral artery                           | 434.91  | 163.529 |

|                                                                                                                  |        |         |
|------------------------------------------------------------------------------------------------------------------|--------|---------|
| Cerebral infarction involving anterior cerebral artery, unspecified laterality                                   | 434.91 | I63.529 |
| Stroke due to stenosis of anterior cerebral artery                                                               | 434.91 | I63.529 |
| Cerebrovascular accident (CVA) due to stenosis of anterior cerebral artery                                       | 434.91 | I63.529 |
| Cerebrovascular accident (CVA) due to occlusion of anterior cerebral artery                                      | 434.91 | I63.529 |
| Stroke due to occlusion of anterior cerebral artery                                                              | 434.91 | I63.529 |
| Cerebrovascular accident (CVA) involving anterior circulation                                                    | 434.91 | I63.529 |
| Cerebrovascular accident (CVA) of uncertain pathology involving anterior circulation                             | 434.91 | I63.529 |
| Cerebral infarction due to unspecified occlusion or stenosis of unspecified anterior cerebral artery             | 434.91 | I63.529 |
| Cerebrovascular accident (CVA) due to stenosis of anterior cerebral artery, unspecified blood vessel laterality  | 434.91 | I63.529 |
| Cerebral infarction due to stenosis of anterior cerebral artery, unspecified blood vessel laterality             | 434.91 | I63.529 |
| Cerebrovascular accident (CVA) due to occlusion of anterior cerebral artery, unspecified blood vessel laterality | 434.91 | I63.529 |
| Cerebral infarction due to anterior cerebral artery occlusion, unspecified blood vessel laterality               | 434.91 | I63.529 |
| Cereb infrc d/t unsp occls or stenosis of unsp ant cereb art                                                     | 434.91 | I63.529 |
| Cerebral infarction due to unspecified occlusion or stenosis of unspecified anterior cerebral artery             |        | I63.529 |

|                                                                                           |        |         |
|-------------------------------------------------------------------------------------------|--------|---------|
| Cerebral infarction due to unspecified occlusion or stenosis of posterior cerebral artery |        | 163.53  |
| Acute right arterial ischemic stroke, PCA (posterior cerebral artery)                     | 434.91 | 163.531 |
| Acute ischemic right PCA stroke                                                           | 434.91 | 163.531 |
| Arterial ischemic stroke, PCA, right, acute                                               | 434.91 | 163.531 |
| Acute right PCA stroke                                                                    | 434.91 | 163.531 |
| Arterial ischemic stroke, PCA (posterior cerebral artery), right, acute                   | 434.91 | 163.531 |
| Acute arterial ischemic stroke, multifocal, posterior circulation, right                  | 434.91 | 163.531 |
| Arterial ischemic stroke, multifocal, posterior circulation, acute, right                 | 434.91 | 163.531 |
| Acute ischemic multifocal posterior circulation stroke, right                             | 434.91 | 163.531 |
| Acute ischemic right posterior cerebral artery (PCA) stroke                               | 434.91 | 163.531 |
| Cerebral infarction due to posterior cerebral artery occlusion, right                     | 434.91 | 163.531 |
| Posterior cerebral circulation hemorrhagic infarction, right                              | 434.91 | 163.531 |
| Cerebral infarction due to occlusion of right posterior cerebral artery                   | 434.91 | 163.531 |
| Hemorrhagic infarction involving posterior cerebral circulation of right side             | 434.91 | 163.531 |
| Acute ischemic multifocal posterior circulation stroke involving right-sided vessel       | 434.91 | 163.531 |
| Cerebral infarction involving right posterior cerebral artery                             | 434.91 | 163.531 |
| Cerebral infarction due to stenosis of right posterior cerebral artery                    | 434.91 | 163.531 |
| Cerebral infarction involving posterior cerebral artery, right                            | 434.91 | 163.531 |

|                                                                                                 |        |         |
|-------------------------------------------------------------------------------------------------|--------|---------|
| Cerebrovascular accident (CVA) due to occlusion of right posterior cerebral artery              | 434.91 | I63.531 |
| Stroke due to stenosis of right posterior cerebral artery                                       | 434.91 | I63.531 |
| Cerebrovascular accident (CVA) due to stenosis of right posterior cerebral artery               | 434.91 | I63.531 |
| Stroke due to occlusion of right posterior cerebral artery                                      | 434.91 | I63.531 |
| Cerebral infarction due to unspecified occlusion or stenosis of right posterior cerebral artery | 434.91 | I63.531 |
| Acute ischemic multifocal right-sided posterior circulation stroke                              | 434.91 | I63.531 |
| Right-sided hemorrhagic posterior cerebral circulation infarction                               | 434.91 | I63.531 |
| Cerebral infarction due to unspecified occlusion or stenosis of right posterior cerebral artery |        | I63.531 |
| Arterial ischemic stroke, PCA (posterior cerebral artery), left, acute                          | 434.91 | I63.532 |
| Left acute arterial ischemic stroke, PCA (posterior cerebral artery)                            | 434.91 | I63.532 |
| Acute ischemic left PCA stroke                                                                  | 434.91 | I63.532 |
| Arterial ischemic stroke, PCA, left, acute                                                      | 434.91 | I63.532 |
| Acute left PCA stroke                                                                           | 434.91 | I63.532 |
| Acute ischemic left posterior cerebral artery stroke                                            | 434.91 | I63.532 |
| Acute ischemic left posterior cerebral artery (PCA) stroke                                      | 434.91 | I63.532 |
| Acute ischemic multifocal posterior circulation stroke, left                                    | 434.91 | I63.532 |
| Arterial ischemic stroke, multifocal, posterior circulation, acute, left                        | 434.91 | I63.532 |
| Acute arterial ischemic stroke, multifocal, posterior circulation, left                         | 434.91 | I63.532 |

|                                                                                                |        |         |
|------------------------------------------------------------------------------------------------|--------|---------|
| Cerebral infarction due to posterior cerebral artery occlusion, left                           | 434.91 | I63.532 |
| Posterior cerebral circulation hemorrhagic infarction, left                                    | 434.91 | I63.532 |
| Cerebral infarction due to occlusion of left posterior cerebral artery                         | 434.91 | I63.532 |
| Hemorrhagic infarction involving posterior cerebral circulation of left side                   | 434.91 | I63.532 |
| Acute ischemic multifocal posterior circulation stroke involving left-sided vessel             | 434.91 | I63.532 |
| Cerebral infarction involving left posterior cerebral artery                                   | 434.91 | I63.532 |
| Cerebral infarction due to stenosis of left posterior cerebral artery                          | 434.91 | I63.532 |
| Cerebral infarction involving posterior cerebral artery, left                                  | 434.91 | I63.532 |
| Cerebrovascular accident (CVA) due to occlusion of left posterior cerebral artery              | 434.91 | I63.532 |
| Stroke due to occlusion of left posterior cerebral artery                                      | 434.91 | I63.532 |
| Cerebrovascular accident (CVA) due to stenosis of left posterior cerebral artery               | 434.91 | I63.532 |
| Stroke due to stenosis of left posterior cerebral artery                                       | 434.91 | I63.532 |
| Cerebral infarction due to unspecified occlusion or stenosis of left posterior cerebral artery | 434.91 | I63.532 |
| Acute ischemic multifocal left-sided posterior circulation stroke                              | 434.91 | I63.532 |
| Left-sided hemorrhagic posterior cerebral circulation infarction                               | 434.91 | I63.532 |
| Cerebral infarction due to unspecified occlusion or stenosis of left posterior cerebral artery |        | I63.532 |
| Cerebral infarction due to bilateral occlusion of posterior cerebral arteries                  | 434.91 | I63.533 |



|                                                                                                              |        |         |
|--------------------------------------------------------------------------------------------------------------|--------|---------|
| Cerebral infarction due to bilateral stenosis of posterior cerebral arteries                                 | 434.91 | I63.533 |
| Cerebrovascular accident (CVA) due to bilateral stenosis of posterior cerebral arteries                      | 434.91 | I63.533 |
| Cerebrovascular accident (CVA) due to bilateral occlusion of posterior cerebral arteries                     | 434.91 | I63.533 |
| Cerebral infarction due to unspecified occlusion or stenosis of bilateral posterior arteries                 | 434.91 | I63.533 |
| Cerebral infarction due to unspecified occlusion or stenosis of bilateral posterior cerebral arteries        | 434.91 | I63.533 |
| Cerebral infarction due to unspecified occlusion or stenosis of bilateral posterior cerebral arteries (CODE) | 434.91 | I63.533 |
| Cerebral infarction due to unspecified occlusion or stenosis of bilateral posterior cerebral arteries        |        | I63.533 |
| Posterior circulation stroke of uncertain pathology                                                          | 434.91 | I63.539 |
| Cerebrovascular accident of uncertain pathology involving posterior circulation                              | 434.91 | I63.539 |
| Cerebrovascular accident (CVA) of uncertain pathology involving posterior circulation                        | 434.91 | I63.539 |
| Arterial ischemic stroke, multifocal, posterior circulation, acute                                           | 434.91 | I63.539 |
| Acute arterial ischemic stroke, multifocal, posterior circulation                                            | 434.91 | I63.539 |
| Acute ischemic multifocal posterior circulation stroke                                                       | 434.91 | I63.539 |
| Occlusion or stenosis of posterior cerebral artery with infarction                                           | 434.91 | I63.539 |

|                                                                                                       |        |         |
|-------------------------------------------------------------------------------------------------------|--------|---------|
| Arterial ischemic stroke, multifocal, posterior circulation, acute, unspecified laterality            | 434.91 | 163.539 |
| Acute arterial ischemic stroke, multifocal, posterior circulation, unspecified laterality             | 434.91 | 163.539 |
| Acute ischemic multifocal posterior circulation stroke, unspecified laterality                        | 434.91 | 163.539 |
| Posterior cerebral circulation hemorrhagic infarction                                                 | 434.91 | 163.539 |
| Cerebral infarction due to posterior cerebral artery occlusion                                        | 434.91 | 163.539 |
| Cerebral infarction due to posterior cerebral artery occlusion, unspecified laterality                | 434.91 | 163.539 |
| Posterior cerebral circulation hemorrhagic infarction, unspecified laterality                         | 434.91 | 163.539 |
| Cerebral infarction involving posterior cerebral artery                                               | 434.91 | 163.539 |
| Cerebral infarction due to stenosis of posterior cerebral artery                                      | 434.91 | 163.539 |
| Cerebral infarction involving posterior cerebral artery, unspecified laterality                       | 434.91 | 163.539 |
| Cerebrovascular accident (CVA) due to occlusion of posterior cerebral artery                          | 434.91 | 163.539 |
| Stroke due to occlusion of posterior cerebral artery                                                  | 434.91 | 163.539 |
| Stroke due to stenosis of posterior cerebral artery                                                   | 434.91 | 163.539 |
| Cerebrovascular accident (CVA) due to stenosis of posterior cerebral artery                           | 434.91 | 163.539 |
| Cerebral infarction due to unspecified occlusion or stenosis of unspecified posterior cerebral artery | 434.91 | 163.539 |
| Cerebral infarction due to stenosis of posterior cerebral artery, unspecified blood vessel laterality | 434.91 | 163.539 |

|                                                                                                                   |        |         |
|-------------------------------------------------------------------------------------------------------------------|--------|---------|
| Cerebrovascular accident (CVA) due to occlusion of posterior cerebral artery, unspecified blood vessel laterality | 434.91 | I63.539 |
| Cerebrovascular accident (CVA) due to stenosis of posterior cerebral artery, unspecified blood vessel laterality  | 434.91 | I63.539 |
| Cerebral infarction due to posterior cerebral artery occlusion, unspecified blood vessel laterality               | 434.91 | I63.539 |
| Cereb infrc d/t unsp occls or stenosis of unsp post cereb art                                                     | 434.91 | I63.539 |
| Cerebral infarction due to unspecified occlusion or stenosis of unspecified posterior cerebral artery             |        | I63.539 |
| Cerebral infarction due to unspecified occlusion or stenosis of cerebellar artery                                 |        | I63.54  |
| Cerebral infarction involving right cerebellar artery                                                             | 434.01 | I63.541 |
| Cerebral infarction involving cerebellar artery, right                                                            | 434.01 | I63.541 |
| Occlusion of posterior inferior cerebellar artery with cerebral infarction, right                                 | 433.81 | I63.541 |
| Occlusion of anterior inferior cerebellar artery with cerebral infarction, right                                  | 433.81 | I63.541 |
| Occlusion of right posterior inferior cerebellar artery with infarction                                           | 433.81 | I63.541 |
| Occlusion of right anterior inferior cerebellar artery with infarction                                            | 433.81 | I63.541 |
| Cerebral infarction due to occlusion of right cerebellar artery                                                   | 434.91 | I63.541 |
| Cerebral infarction due to stenosis of right cerebellar artery                                                    | 434.91 | I63.541 |
| Occlusion of posterior inferior cerebellar artery with infarction, right                                          | 433.81 | I63.541 |
| Occlusion of anterior inferior cerebellar artery with infarction, right                                           | 433.81 | I63.541 |

|                                                                                         |        |         |
|-----------------------------------------------------------------------------------------|--------|---------|
| Stroke in pediatric patient due to aneurysm, right                                      | 434.91 | I63.541 |
| Stroke due to occlusion of right cerebellar artery                                      | 434.91 | I63.541 |
| Cerebrovascular accident (CVA) due to occlusion of right cerebellar artery              | 434.91 | I63.541 |
| Stroke due to stenosis of right cerebellar artery                                       | 434.91 | I63.541 |
| Cerebrovascular accident (CVA) due to stenosis of right cerebellar artery               | 434.91 | I63.541 |
| Cerebral infarction due to unspecified occlusion or stenosis of right cerebellar artery | 434.91 | I63.541 |
| Cereb infrc due to unsp occls or stenosis of right cerebellar art                       | 434.91 | I63.541 |
| Cerebral infarction due to unspecified occlusion or stenosis of right cerebellar artery |        | I63.541 |
| Cerebral infarction involving left cerebellar artery                                    | 434.01 | I63.542 |
| Cerebral infarction involving cerebellar artery, left                                   | 434.01 | I63.542 |
| Stroke in child due to aneurysm, left                                                   | 434.91 | I63.542 |
| Occlusion of posterior inferior cerebellar artery with cerebral infarction, left        | 433.81 | I63.542 |
| Occlusion of anterior inferior cerebellar artery with cerebral infarction, left         | 433.81 | I63.542 |
| Occlusion of left posterior inferior cerebellar artery with infarction                  | 433.81 | I63.542 |
| Occlusion of left anterior inferior cerebellar artery with infarction                   | 433.81 | I63.542 |
| Cerebral infarction due to occlusion of left cerebellar artery                          | 434.91 | I63.542 |
| Cerebral infarction due to stenosis of left cerebellar artery                           | 434.91 | I63.542 |
| Occlusion of posterior inferior cerebellar artery with infarction, left                 | 433.81 | I63.542 |

|                                                                                               |        |         |
|-----------------------------------------------------------------------------------------------|--------|---------|
| Occlusion of anterior inferior cerebellar artery with infarction, left                        | 433.81 | 163.542 |
| Stroke in pediatric patient due to aneurysm, left                                             | 434.91 | 163.542 |
| Cerebrovascular accident (CVA) due to occlusion of left cerebellar artery                     | 434.91 | 163.542 |
| Cerebrovascular accident (CVA) due to stenosis of left cerebellar artery                      | 434.91 | 163.542 |
| Stroke due to occlusion of left cerebellar artery                                             | 434.91 | 163.542 |
| Stroke due to stenosis of left cerebellar artery                                              | 434.91 | 163.542 |
| Cerebral infarction due to unspecified occlusion or stenosis of left cerebellar artery        | 434.91 | 163.542 |
| Cerebral infarction due to unspecified occlusion or stenosis of left cerebellar artery        |        | 163.542 |
| Cerebrovascular accident (CVA) due to bilateral occlusion of cerebellar arteries              | 434.91 | 163.543 |
| Cerebrovascular accident (CVA) due to bilateral stenosis of cerebellar arteries               | 434.91 | 163.543 |
| Infarction of brain due to bilateral occlusion of cerebellar arteries                         | 434.91 | 163.543 |
| Infarction of brain due to bilateral stenosis of cerebellar arteries                          | 434.91 | 163.543 |
| Cerebral infarction due to unspecified occlusion or stenosis of bilateral cerebellar arteries | 434.91 | 163.543 |
| Cerebral infarction due to unspecified occlusion or stenosis of bilateral cerebellar arteries |        | 163.543 |
| Cerebellar infarction with occlusion or stenosis of cerebellar artery                         | 434.91 | 163.549 |
| Cerebral infarction involving cerebellar artery                                               | 434.01 | 163.549 |

|                                                                                                    |        |         |
|----------------------------------------------------------------------------------------------------|--------|---------|
| Cerebral infarction involving cerebellar artery, unspecified laterality                            | 434.01 | 163.549 |
| Stroke in child due to aneurysm, unspecified laterality                                            | 434.91 | 163.549 |
| Occlusion of posterior inferior cerebellar artery with cerebral infarction                         | 433.81 | 163.549 |
| Occlusion of anterior inferior cerebellar artery with cerebral infarction                          | 433.81 | 163.549 |
| Occlusion of posterior inferior cerebellar artery with cerebral infarction, unspecified laterality | 433.81 | 163.549 |
| Occlusion of anterior inferior cerebellar artery with cerebral infarction, unspecified laterality  | 433.81 | 163.549 |
| Occlusion of posterior inferior cerebellar artery with infarction                                  | 433.81 | 163.549 |
| Occlusion of anterior inferior cerebellar artery with infarction                                   | 433.81 | 163.549 |
| Stroke in pediatric patient due to aneurysm                                                        | 434.91 | 163.549 |
| Cerebral infarction due to occlusion of cerebellar artery                                          | 433.81 | 163.549 |
| Cerebral infarction due to stenosis of cerebellar artery                                           | 433.81 | 163.549 |
| Occlusion of posterior inferior cerebellar artery with infarction, unspecified laterality          | 433.81 | 163.549 |
| Occlusion of anterior inferior cerebellar artery with infarction, unspecified laterality           | 433.81 | 163.549 |
| Stroke in pediatric patient due to aneurysm, unspecified laterality                                | 434.91 | 163.549 |
| Stroke due to occlusion of cerebellar artery                                                       | 434.91 | 163.549 |
| Cerebrovascular accident (CVA) due to occlusion of cerebellar artery                               | 434.91 | 163.549 |
| Stroke due to stenosis of cerebellar artery                                                        | 434.91 | 163.549 |

|                                                                                                           |        |         |
|-----------------------------------------------------------------------------------------------------------|--------|---------|
| Cerebrovascular accident (CVA) due to stenosis of cerebellar artery                                       | 434.91 | 163.549 |
| Cerebral infarction due to unspecified occlusion or stenosis of unspecified cerebellar artery             | 433.81 | 163.549 |
| Cerebrovascular accident (CVA) due to occlusion of cerebellar artery, unspecified blood vessel laterality | 434.91 | 163.549 |
| Cerebrovascular accident (CVA) due to stenosis of cerebellar artery, unspecified blood vessel laterality  | 434.91 | 163.549 |
| Cerebral infarction due to stenosis of cerebellar artery, unspecified blood vessel laterality             | 433.81 | 163.549 |
| Cerebral infarction due to occlusion of cerebellar artery, unspecified blood vessel laterality            | 433.81 | 163.549 |
| Cereb infrc due to unsp occls or stenosis of unsp cereblr art                                             | 433.81 | 163.549 |
| Cerebral infarction due to unspecified occlusion or stenosis of unspecified cerebellar artery             |        | 163.549 |
| Occlusion and stenosis of other specified precerebral artery with cerebral infarction                     | 433.81 | 163.59  |
| Other precerebral occl w/ infarc                                                                          | 433.81 | 163.59  |
| Cerebral infarction due to stenosis of other cerebral artery                                              | 434.91 | 163.59  |
| Cerebral infarction due to occlusion of other cerebral artery                                             | 434.91 | 163.59  |
| Cerebral infarction due to unspecified occlusion or stenosis of other cerebral artery                     | 434.91 | 163.59  |
| Cerebrovascular accident (CVA) due to occlusion of other cerebral artery                                  | 434.91 | 163.59  |
| Cerebrovascular accident (CVA) due to stenosis of other cerebral artery                                   | 434.91 | 163.59  |

|                                                                                       |        |        |
|---------------------------------------------------------------------------------------|--------|--------|
| Cerebral infarction due to unspecified occlusion or stenosis of other cerebral artery |        | 163.59 |
| Cerebral venous infarction, associated with CSVT, acute                               | 434.01 | 163.6  |
| Acute cerebral venous infarction associated with CSVT                                 | 434.01 | 163.6  |
| Ac cerebral infarction assoc w/ CSVT                                                  | 434.01 | 163.6  |
| Cerebral infarction due to cerebral venous thrombosis, nonpyogenic                    | 434.01 | 163.6  |
| Acute cerebral venous infarction associated with cerebral sinovenous thrombosis       | 434.01 | 163.6  |
| Cerebral venous infarction, associated with cerebral sinovenous thrombosis, acute     | 434.01 | 163.6  |
| Cerebral infarction due to nonpyogenic cerebral venous thrombosis                     | 434.01 | 163.6  |
| Cerebral venous thrombosis of cortical vein with infarction                           | 434.01 | 163.6  |
| Stroke due to nonpyogenic cerebral venous thrombosis                                  | 434.91 | 163.6  |
| Cerebrovascular accident (CVA) due to nonpyogenic cerebral venous thrombosis          | 434.91 | 163.6  |
| Cerebral infarction due to cerebral venous thrombosis, nonpyogenic                    |        | 163.6  |
| Other cerebral infarction                                                             |        | 163.8  |
| Lacunar infarction                                                                    | 434.91 | 163.81 |
| Lacunar stroke                                                                        | 434.91 | 163.81 |
| Stroke, lacunar                                                                       | 434.91 | 163.81 |
| Acute lacunar infarction                                                              | 434.91 | 163.81 |
| Lacunar infarct, acute                                                                | 434.91 | 163.81 |
| Left sided lacunar infarction                                                         | 434.91 | 163.81 |
| Left sided lacunar stroke                                                             | 434.91 | 163.81 |
| Pure sensorimotor lacunar infarction                                                  | 434.91 | 163.81 |
| Multiple lacunar infarcts                                                             | 434.91 | 163.81 |
| Right-sided lacunar stroke                                                            | 434.91 | 163.81 |
| Right-sided lacunar infarction                                                        | 434.91 | 163.81 |



|                                                                        |        |        |
|------------------------------------------------------------------------|--------|--------|
| Left temporal lobe infarction                                          | 434.91 | 163.89 |
| Infarction of left temporal lobe                                       | 434.91 | 163.89 |
| Infarction of right temporal lobe                                      | 434.91 | 163.89 |
| Right temporal lobe infarction                                         | 434.91 | 163.89 |
| Brain stem infarction                                                  | 434.91 | 163.89 |
| Brainstem infarction                                                   | 434.91 | 163.89 |
| Acute arterial ischemic stroke, multifocal, mult vascular territories  | 434.91 | 163.89 |
| Acute idiopathic cerebral venous infarction                            | 434.91 | 163.89 |
| Cerebral venous infarction, idiopathic, acute                          | 434.91 | 163.89 |
| Acute bilateral cerebral infarction in a watershed distribution        | 434.91 | 163.89 |
| Cerebral infarction, watershed distribution, bilateral, acute          | 434.91 | 163.89 |
| Acute cerebral infarction associated with systemic hypoxia or ischemia | 434.91 | 163.89 |
| Acute global diffuse cerebral infarction                               | 434.91 | 163.89 |
| Cerebral infarction, global diffuse, acute                             | 434.91 | 163.89 |
| Acute ischemic multifocal multiple vascular territories stroke         | 434.91 | 163.89 |
| Acute unilateral cerebral infarction in a watershed distribution       | 434.91 | 163.89 |
| Cerebral infarction, watershed distribution, unilateral, acute         | 434.91 | 163.89 |
| Cerebral venous infarction, acute                                      | 434.91 | 163.89 |
| Acute cerebral venous infarction                                       | 434.91 | 163.89 |
| Acute bilat watershed infarction                                       | 434.91 | 163.89 |
| Ac cerebral infarction w/ ischemia                                     | 434.91 | 163.89 |
| Acute global cerebral infarction                                       | 434.91 | 163.89 |
| Ac isch multi vasc territories stroke                                  | 434.91 | 163.89 |
| Acute brainstem infarction                                             | 434.91 | 163.89 |
| Brainstem infarct, acute                                               | 434.91 | 163.89 |
| Infarction of parietal lobe                                            | 434.91 | 163.89 |
| Parietal lobe infarction                                               | 434.91 | 163.89 |

|                                                                            |        |        |
|----------------------------------------------------------------------------|--------|--------|
| Arterial ischemic stroke, multifocal, multiple vascular territories, acute | 434.91 | 163.89 |
| Acute arterial ischemic stroke, multifocal, multiple vascular territories  | 434.91 | 163.89 |
| Cerebral infarction, associated with systemic hypoxia or ischemia, acute   | 434.91 | 163.89 |
| Acute hemorrhagic infarction of brain                                      | 434.91 | 163.89 |
| Infarction of visual cortex                                                | 434.91 | 163.89 |
| Anterior cerebral circulation hemorrhagic infarction                       | 431    | 163.89 |
| Cerebral infarction due to other mechanism                                 | 434.91 | 163.89 |
| Other cerebral infarction                                                  | 434.91 | 163.89 |
| Cerebrovascular accident (CVA) due to other mechanism                      | 434.91 | 163.89 |
| Right subthalamic lacunar stroke                                           | 434.91 | 163.9  |
| Lacunar stroke of right subthalamic region                                 | 434.91 | 163.9  |
| Lacunar stroke of left subthalamic region                                  | 434.91 | 163.9  |
| Left subthalamic lacunar stroke                                            | 434.91 | 163.9  |
| Impending cerebrovascular accident                                         | 435.9  | 163.9  |
| Progressing stroke                                                         | 435.9  | 163.9  |
| RIND (reversible ischemic neurologic deficit) syndrome                     | 434.91 | 163.9  |
| Reversible ischemic neurologic deficit syndrome                            | 434.91 | 163.9  |
| Cerebellar infarction                                                      | 434.91 | 163.9  |
| R.I.N.D. syndrome                                                          | 434.91 | 163.9  |
| Anterior choroidal artery infarction                                       | 434.91 | 163.9  |
| Posterior choroidal artery infarction                                      | 434.91 | 163.9  |
| Mini stroke                                                                | 434.91 | 163.9  |
| Brainstem stroke                                                           | 434.91 | 163.9  |
| Basal ganglia infarction                                                   | 434.91 | 163.9  |
| Brain attack                                                               | 434.91 | 163.9  |
| Acute cerebrovascular accident                                             | 434.91 | 163.9  |
| Brain vascular accident                                                    | 436    | 163.9  |
| Cerebral infarction                                                        | 434.91 | 163.9  |

|                                                 |        |       |
|-------------------------------------------------|--------|-------|
| Cerebral infarction, left hemisphere            | 434.91 | 163.9 |
| Cerebral vascular accident                      | 434.91 | 163.9 |
| Cerebrovascular accident                        | 434.91 | 163.9 |
| Cerebrovascular accident (stroke)               | 434.91 | 163.9 |
| CI (cerebral infarction)                        | 434.91 | 163.9 |
| Completed stroke                                | 434.91 | 163.9 |
| CVA (cerebral infarction)                       | 434.91 | 163.9 |
| CVA (cerebral vascular accident)                | 434.91 | 163.9 |
| CVA (cerebrovascular accident)                  | 434.91 | 163.9 |
| Nonparalytic stroke                             | 434.91 | 163.9 |
| Paralytic stroke                                | 434.91 | 163.9 |
| Right hemisphere, cerebral infarction           | 434.91 | 163.9 |
| Small vessel stroke                             | 434.91 | 163.9 |
| Stroke                                          | 434.91 | 163.9 |
| Stroke (cerebrum)                               | 434.91 | 163.9 |
| Stroke, paralytic                               | 434.91 | 163.9 |
| Stroke/cerebrovascular accident                 | 434.91 | 163.9 |
| Subcortical infarction                          | 434.91 | 163.9 |
| Thalamic infarction                             | 434.91 | 163.9 |
| Thrombotic stroke                               | 434.01 | 163.9 |
| Right sided cerebral infarction                 | 434.91 | 163.9 |
| Nonparalytic stroke syndrome                    | 434.91 | 163.9 |
| Cerebral infarct                                | 434.91 | 163.9 |
| Occipital cerebral infarction                   | 434.91 | 163.9 |
| Occipital cortex infarction                     | 434.91 | 163.9 |
| Occipital infarction                            | 434.91 | 163.9 |
| Occipital stroke                                | 434.91 | 163.9 |
| White matter periventricular infarction         | 434.91 | 163.9 |
| Cerebrovascular accident involving large vessel | 434.91 | 163.9 |
| Cerebrovascular accident, large vessel          | 434.91 | 163.9 |
| Stroke, large vessel                            | 434.91 | 163.9 |
| Large vessel stroke                             | 434.91 | 163.9 |
| Congenital stroke                               | 434.91 | 163.9 |
| Newborn stroke                                  | 434.91 | 163.9 |
| Arterial ischemic stroke                        | 434.91 | 163.9 |
| Acute ischemic stroke                           | 434.91 | 163.9 |

|                                                                        |        |       |
|------------------------------------------------------------------------|--------|-------|
| Cerebral infarction, acute                                             | 434.91 | 163.9 |
| Acute cerebral infarction                                              | 434.91 | 163.9 |
| Chronic idiopathic cerebral venous infarction                          | 434.91 | 163.9 |
| RIND syndrome                                                          | 434.91 | 163.9 |
| RIND (reversible ischemic neurologic deficit)                          | 434.91 | 163.9 |
| Stroke, thrombotic                                                     | 434.01 | 163.9 |
| Cerebral venous infarction, chronic                                    | 434.91 | 163.9 |
| Chronic cerebral venous infarction                                     | 434.91 | 163.9 |
| Chronic global diffuse cerebral infarction                             | 434.91 | 163.9 |
| Chronic cerebral infarction assoc w/ with systemic hypoxia or ischemia | 434.91 | 163.9 |
| Stroke, small vessel                                                   | 434.91 | 163.9 |
| Cerebellar infarct                                                     | 434.91 | 163.9 |
| Reversible ischemic neurologic deficit                                 | 434.91 | 163.9 |
| Cerebrovascular accident due to occlusion                              | 434.91 | 163.9 |
| Cerebrovascular accident, impending                                    | 435.9  | 163.9 |
| Acute cerebrovascular accident of cerebellum                           | 434.91 | 163.9 |
| Cerebellar stroke, acute                                               | 434.91 | 163.9 |
| Acute lacunar stroke                                                   | 434.91 | 163.9 |
| Lacunar stroke, acute                                                  | 434.91 | 163.9 |
| Acute thalamic infarction                                              | 434.91 | 163.9 |
| Thalamic infarct, acute                                                | 434.91 | 163.9 |
| New infarction of cerebellum                                           | 434.91 | 163.9 |
| New cerebellar infarct                                                 | 434.91 | 163.9 |
| Acute occipital temporal infarction                                    | 434.91 | 163.9 |
| Occipitotemporal infarct, acute                                        | 434.91 | 163.9 |
| Pediatric stroke                                                       | 434.91 | 163.9 |
| Pediatric cerebrovascular accident                                     | 434.91 | 163.9 |
| Stroke of unusual cause                                                | 434.91 | 163.9 |
| Reversible ischemic neurological deficit                               | 434.91 | 163.9 |
| Stroke with cerebral ischemia                                          | 434.91 | 163.9 |
| Multiple cerebral infarctions                                          | 434.91 | 163.9 |

|                                                                            |        |       |
|----------------------------------------------------------------------------|--------|-------|
| Chronic cerebral infarction associated with systemic hypoxia or ischemia   | 434.91 | 163.9 |
| Cerebral infarction, associated with systemic hypoxia or ischemia, chronic | 434.91 | 163.9 |
| Stroke-like episode                                                        | 434.91 | 163.9 |
| Recent cerebral infarction in basilar artery distribution                  | 434.91 | 163.9 |
| RIND (reversible ischemic neurologic deficit), acute                       | 434.91 | 163.9 |
| Acute reversible ischemic neurologic deficit                               | 434.91 | 163.9 |
| Left sided cerebral hemisphere cerebrovascular accident                    | 436    | 163.9 |
| Right sided cerebral hemisphere cerebrovascular accident                   | 434.91 | 163.9 |
| Non-hemorrhagic cerebrovascular accident                                   | 434.91 | 163.9 |
| Non-hemorrhagic stroke                                                     | 434.91 | 163.9 |
| Cerebrovascular accident with involvement of both sides of body            | 434.91 | 163.9 |
| Cerebrovascular accident with involvement of right side of body            | 434.91 | 163.9 |
| Cerebrovascular accident with involvement of left side of body             | 434.91 | 163.9 |
| Cerebrovascular accident without paresis                                   | 434.91 | 163.9 |
| Cerebrovascular event                                                      | 434.91 | 163.9 |
| Diagnosis of stroke during current admission                               | 434.91 | 163.9 |
| Acute CVA (cerebrovascular accident)                                       | 434.91 | 163.9 |
| Diagnosed with stroke this admission                                       | 434.91 | 163.9 |
| Ischemic stroke                                                            | 434.91 | 163.9 |
| Cerebellar stroke                                                          | 434.91 | 163.9 |
| Signs of major cerebral infarct                                            | 434.91 | 163.9 |
| Ischemic stroke diagnosed during current admission                         | 434.91 | 163.9 |
| Death due to stroke                                                        | 434.91 | 163.9 |

|                                                                       |        |       |
|-----------------------------------------------------------------------|--------|-------|
| Cerebral infarction due to vascular occlusion                         | 433.11 | 163.9 |
| Cerebral infarction due to vascular stenosis                          | 433.11 | 163.9 |
| Cerebrovascular accident involving cerebellum                         | 434.91 | 163.9 |
| Ischemic stroke without coma                                          | 434.91 | 163.9 |
| Idiopathic ischemic stroke in adult                                   | 434.91 | 163.9 |
| Cerebrovascular accident determined by clinical assessment            | 434.91 | 163.9 |
| Stroke determined by clinical assessment                              | 434.91 | 163.9 |
| Idiopathic ischemic cerebrovascular accident in pediatric patient     | 434.91 | 163.9 |
| Idiopathic ischemic stroke occurring in pediatric patient             | 434.91 | 163.9 |
| Idiopathic ischemic cerebrovascular accident in adult                 | 434.91 | 163.9 |
| Cerebral infarction due to unspecified mechanism                      | 434.91 | 163.9 |
| Cerebrovascular accident (CVA)                                        | 434.91 | 163.9 |
| Focal infarction of brain                                             | 434.91 | 163.9 |
| Cerebrovascular accident (CVA) due to vascular stenosis               | 434.91 | 163.9 |
| Stroke due to vascular occlusion                                      | 434.91 | 163.9 |
| Cerebrovascular accident (CVA) due to vascular occlusion              | 434.91 | 163.9 |
| Stroke due to vascular stenosis                                       | 434.91 | 163.9 |
| Stroke due to thrombosis                                              | 434.01 | 163.9 |
| Cerebrovascular accident (CVA) due to thrombosis                      | 434.01 | 163.9 |
| Cerebrovascular accident (CVA) with involvement of both sides of body | 434.91 | 163.9 |
| Cerebrovascular accident (CVA) with involvement of left side of body  | 434.91 | 163.9 |
| Cerebrovascular accident (CVA) with involvement of right side of body | 434.91 | 163.9 |

|                                                                          |        |       |
|--------------------------------------------------------------------------|--------|-------|
| Cerebrovascular accident (CVA) due to occlusion                          | 434.91 | 163.9 |
| Acute cerebrovascular accident (CVA)                                     | 434.91 | 163.9 |
| Acute cerebrovascular accident (CVA) of cerebellum                       | 434.91 | 163.9 |
| Impending cerebrovascular accident (CVA)                                 | 435.9  | 163.9 |
| Idiopathic ischemic cerebrovascular accident (CVA) in adult              | 434.91 | 163.9 |
| Cerebrovascular accident (CVA) without paresis                           | 434.91 | 163.9 |
| Cerebrovascular accident (CVA) determined by clinical assessment         | 434.91 | 163.9 |
| Idiopathic ischemic cerebrovascular accident (CVA) in pediatric patient  | 434.91 | 163.9 |
| Cerebrovascular accident (CVA) involving large vessel                    | 434.91 | 163.9 |
| Cerebrovascular accident (CVA) involving cerebellum                      | 434.91 | 163.9 |
| Non-hemorrhagic cerebrovascular accident (CVA)                           | 434.91 | 163.9 |
| Left sided cerebral hemisphere cerebrovascular accident (CVA)            | 436    | 163.9 |
| Right sided cerebral hemisphere cerebrovascular accident (CVA)           | 434.91 | 163.9 |
| Right-sided cerebrovascular accident (CVA)                               | 434.91 | 163.9 |
| Left-sided cerebrovascular accident (CVA)                                | 436    | 163.9 |
| Cerebrovascular accident (CVA) involving right cerebral hemisphere       | 434.91 | 163.9 |
| Cerebrovascular accident (CVA) involving left cerebral hemisphere        | 436    | 163.9 |
| Ischemic cerebrovascular accident (CVA) of frontal lobe                  | 434.91 | 163.9 |
| Ischemic stroke of frontal lobe                                          | 434.91 | 163.9 |
| Cerebrovascular accident aborted by administration of thrombolytic agent | 434.91 | 163.9 |

|                                                                                     |                |               |
|-------------------------------------------------------------------------------------|----------------|---------------|
| Stroke aborted by administration of thrombolytic agent                              | 434.91         | I63.9         |
| Cerebral infarction, unspecified                                                    | 434.91         | I63.9         |
| Cerebrovascular accident (CVA), unspecified mechanism                               | 434.91         | I63.9         |
| Cerebral infarction, unspecified mechanism                                          | 434.91         | I63.9         |
| Nonatherosclerotic cerebrovascular accident (CVA)                                   | 434.91         | I63.9         |
| Silent cerebral infarction                                                          | 434.91         | I63.9         |
| Cerebral infarction, unspecified                                                    |                | I63.9         |
| Transient ischemic attack (TIA), and cerebral infarction without residual deficits  | 434.91, 435.9  | I63.9, G45.9  |
| Transient ischaemic attack (TIA), and cerebral infarction without residual deficits | 434.91, 435.9  | I63.9, G45.9  |
| Flaccid hemiplegia due to infarction of brain                                       | 342.00, 434.91 | I63.9, G81.00 |
| Flaccid hemiplegia of right dominant side due to infarction of brain                | 342.01, 434.91 | I63.9, G81.01 |
| Flaccid hemiplegia of left dominant side due to infarction of brain                 | 342.01, 434.91 | I63.9, G81.02 |
| Flaccid hemiplegia of right nondominant side due to infarction of brain             | 342.02, 434.91 | I63.9, G81.03 |
| Flaccid hemiplegia of left nondominant side due to infarction of brain              | 342.02, 434.91 | I63.9, G81.04 |
| Spastic hemiplegia due to infarction of brain                                       | 434.91, 342.10 | I63.9, G81.10 |
| Spastic hemiplegia of right dominant side due to infarction of brain                | 434.91, 342.11 | I63.9, G81.11 |
| Spastic hemiplegia of left dominant side due to infarction of brain                 | 434.91, 342.11 | I63.9, G81.12 |
| Spastic hemiplegia of left nondominant side due to infarction of brain              | 434.91, 342.12 | I63.9, G81.14 |
| Hemiplegia due to infarction of brain                                               | 434.91, 342.90 | I63.9, G81.90 |
| Hemiparesis due to cerebral infarction, unspecified laterality                      | 438.2          | I63.9, G81.90 |



|                                                                                          |                |               |
|------------------------------------------------------------------------------------------|----------------|---------------|
| Hemiplegia of right dominant side due to infarction of brain                             | 438.21, 429.79 | I63.9, G81.91 |
| Hemiplegia of left dominant side due to infarction of brain                              | 438.21         | I63.9, G81.92 |
| Hemiplegia of right nondominant side due to infarction of brain                          | 438.22, 429.79 | I63.9, G81.93 |
| Hemiplegia of left nondominant side due to infarction of brain                           | 434.91, 438.22 | I63.9, G81.94 |
| Ischemic stroke with paralysis                                                           | 434.91, 344.9  | I63.9, G83.9  |
| Presumed perinatal ischemic verteobasilar artery brainstem stroke                        | 779.9          | I63.9, P91.0  |
| Arterial ischemic stroke, verteobasilar, brainstem, presumed perinatal                   | 779.9          | I63.9, P91.0  |
| Ischemic stroke with coma                                                                | 434.91, 780.01 | I63.9, R40.20 |
| Seizure with onset of stroke                                                             | 434.91, 780.39 | I63.9, R56.9  |
| Contraindication for thrombolytic medication in stroke patient                           | 434.91, V64.1  | I63.9, Z53.09 |
| Occlusion and stenosis of precerebral arteries, not resulting in cerebral infarction     |                | I65           |
| Occlusion and stenosis of vertebral artery                                               |                | I65.0         |
| Occlusion and stenosis of right vertebral artery                                         | 433.2          | I65.01        |
| Vertebral artery narrowing, right                                                        | 433.2          | I65.01        |
| Thrombosis, arteries, vertebral, right                                                   | 433.2          | I65.01        |
| Occlusion and stenosis of vertebral artery without mention of cerebral infarction, right | 433.2          | I65.01        |
| Verteobasilar artery stenosis, right                                                     | 433.3          | I65.01        |
| Vertebral artery thrombosis, right                                                       | 433.2          | I65.01        |
| Vertebral artery stenosis, symptomatic, without infarction, right                        | 433.2          | I65.01        |
| Symptomatic vertebral artery stenosis without infarction, right                          | 433.2          | I65.01        |
| Vertebral artery obstruction, right                                                      | 433.2          | I65.01        |
| Vertebral artery stenosis, right                                                         | 433.2          | I65.01        |

|                                                                               |       |        |
|-------------------------------------------------------------------------------|-------|--------|
| Asymptomatic vertebral artery stenosis, right                                 | 433.2 | I65.01 |
| Vertebral artery stenosis/occlusion, right                                    | 433.2 | I65.01 |
| Vertebral artery stenosis, asymptomatic, right                                | 433.2 | I65.01 |
| Vertebral artery stenosis, non-symptomatic, right                             | 433.2 | I65.01 |
| Occlusion and stenosis of vertebral artery, right                             | 433.2 | I65.01 |
| Occlusion of vertebral artery, right                                          | 433.2 | I65.01 |
| Vertebral artery occlusion, right                                             | 433.2 | I65.01 |
| Stenosis of vertebral artery without cerebral infarction, right               | 433.2 | I65.01 |
| Occlusion of vertebral artery without cerebral infarction, right              | 433.2 | I65.01 |
| Symptomatic stenosis of right vertebral artery without infarction             | 433.2 | I65.01 |
| Thrombosis of right vertebral artery                                          | 433.2 | I65.01 |
| Occlusion of right vertebral artery                                           | 433.2 | I65.01 |
| Stenosis of right vertebral artery without cerebral infarction                | 433.2 | I65.01 |
| Stenosis of right vertebral artery                                            | 433.2 | I65.01 |
| Obstruction of right vertebral artery                                         | 433.2 | I65.01 |
| Stenosis of right vertebral artery                                            | 433.3 | I65.01 |
| Occlusion of right vertebral artery without cerebral infarction               | 433.2 | I65.01 |
| Asymptomatic stenosis of right vertebral artery                               | 433.2 | I65.01 |
| Occlusion and stenosis of vertebral artery without cerebral infarction, right | 433.2 | I65.01 |
| Occlusion or stenosis of right vertebral artery without cerebral infarction   | 433.2 | I65.01 |
| Occlusion and stenosis of right vertebral artery                              |       | I65.01 |
| Occlusion and stenosis of left vertebral artery                               | 433.2 | I65.02 |

|                                                                                         |       |        |
|-----------------------------------------------------------------------------------------|-------|--------|
| Vertebral artery stenosis, non-symptomatic, left                                        | 433.2 | I65.02 |
| Vertebrobasilar artery stenosis, left                                                   | 433.3 | I65.02 |
| Vertebral artery stenosis, left                                                         | 433.2 | I65.02 |
| Vertebral artery stenosis/occlusion, left                                               | 433.2 | I65.02 |
| Vertebral artery narrowing, left                                                        | 433.2 | I65.02 |
| Vertebral artery stenosis, asymptomatic, left                                           | 433.2 | I65.02 |
| Vertebral artery stenosis, symptomatic, without infarction, left                        | 433.2 | I65.02 |
| Occlusion and stenosis of vertebral artery without mention of cerebral infarction, left | 433.2 | I65.02 |
| Vertebral artery obstruction, left                                                      | 433.2 | I65.02 |
| Vertebral artery thrombosis, left                                                       | 433.2 | I65.02 |
| Asymptomatic vertebral artery stenosis, left                                            | 433.2 | I65.02 |
| Occlusion and stenosis of vertebral artery, left                                        | 433.2 | I65.02 |
| Thrombosis, arteries, vertebral, left                                                   | 433.2 | I65.02 |
| Symptomatic vertebral artery stenosis without infarction, left                          | 433.2 | I65.02 |
| Vertebral artery occlusion, left                                                        | 433.2 | I65.02 |
| Occlusion of vertebral artery, left                                                     | 433.2 | I65.02 |
| Occlusion of vertebral artery without cerebral infarction, left                         | 433.2 | I65.02 |
| Stenosis of vertebral artery without cerebral infarction, left                          | 433.2 | I65.02 |
| Occlusion of left vertebral artery without cerebral infarction                          | 433.2 | I65.02 |
| Obstruction of left vertebral artery                                                    | 433.2 | I65.02 |
| Asymptomatic stenosis of left vertebral artery                                          | 433.2 | I65.02 |
| Stenosis of left vertebral artery without cerebral infarction                           | 433.2 | I65.02 |
| Stenosis of left vertebral artery                                                       | 433.2 | I65.02 |
| Thrombosis of left vertebral artery                                                     | 433.2 | I65.02 |

|                                                                                              |       |        |
|----------------------------------------------------------------------------------------------|-------|--------|
| Stenosis of left vertebrbasilar artery                                                       | 433.3 | I65.02 |
| Occlusion of left vertebral artery                                                           | 433.2 | I65.02 |
| Symptomatic stenosis of left vertebral artery without infarction                             | 433.2 | I65.02 |
| Occlusion and stenosis of vertebral artery without cerebral infarction, left                 | 433.2 | I65.02 |
| Occlusion or stenosis of left vertebral artery without cerebral infarction                   | 433.2 | I65.02 |
| Occlusion and stenosis of left vertebral artery                                              |       | I65.02 |
| Occlusion and stenosis of both vertebral arteries                                            | 433.2 | I65.03 |
| Vertebrobasilar artery stenosis, bilateral                                                   | 433.3 | I65.03 |
| Vertebral artery stenosis, symptomatic, without infarction, bilateral                        | 433.2 | I65.03 |
| Vertebral artery thrombosis, bilateral                                                       | 433.2 | I65.03 |
| Vertebral artery obstruction, bilateral                                                      | 433.2 | I65.03 |
| Vertebral artery stenosis, bilateral                                                         | 433.2 | I65.03 |
| Asymptomatic vertebral artery stenosis, bilateral                                            | 433.2 | I65.03 |
| Vertebral artery stenosis, asymptomatic, bilateral                                           | 433.2 | I65.03 |
| Vertebral artery stenosis, non-symptomatic, bilateral                                        | 433.2 | I65.03 |
| Occlusion and stenosis of vertebral artery, bilateral                                        | 433.2 | I65.03 |
| Vertebral artery narrowing, bilateral                                                        | 433.2 | I65.03 |
| Symptomatic vertebral artery stenosis without infarction, bilateral                          | 433.2 | I65.03 |
| Occlusion and stenosis of vertebral artery without mention of cerebral infarction, bilateral | 433.2 | I65.03 |
| Vertebral artery stenosis/occlusion, bilateral                                               | 433.2 | I65.03 |
| Thrombosis, arteries, vertebral, bilateral                                                   | 433.2 | I65.03 |
| Vertebral artery occlusion, bilateral                                                        | 433.2 | I65.03 |
| Occlusion of vertebral artery, bilateral                                                     | 433.2 | I65.03 |

|                                                                                   |                |        |
|-----------------------------------------------------------------------------------|----------------|--------|
| Occlusion of vertebral artery without cerebral infarction, bilateral              | 433.2          | I65.03 |
| Stenosis of vertebral artery without cerebral infarction, bilateral               | 433.2          | I65.03 |
| Symptomatic stenosis of both vertebral arteries without infarction                | 433.2          | I65.03 |
| Stenosis of both vertebrobasilar arteries                                         | 433.3          | I65.03 |
| Thrombosis of both vertebral arteries                                             | 433.2          | I65.03 |
| Stenosis of both vertebral arteries                                               | 433.2          | I65.03 |
| Stenosis of both vertebral arteries without cerebral infarction                   | 433.2          | I65.03 |
| Occlusion of both vertebral arteries                                              | 433.2          | I65.03 |
| Obstruction of both vertebral arteries                                            | 433.2          | I65.03 |
| Occlusion of both vertebral arteries without cerebral infarction                  | 433.2          | I65.03 |
| Asymptomatic stenosis of both vertebral arteries                                  | 433.2          | I65.03 |
| Occlusion and stenosis of vertebral artery without cerebral infarction, bilateral | 433.20, 433.30 | I65.03 |
| Occlusion and stenosis of bilateral vertebral arteries                            | 433.2          | I65.03 |
| Occlusion or stenosis of both vertebral arteries without cerebral infarction      | 433.20, 433.30 | I65.03 |
| Occlusion and stenosis of bilateral vertebral arteries                            |                | I65.03 |
| Occlusion and stenosis of vertebral artery without mention of cerebral infarction | 433.2          | I65.09 |
| Vertebral artery stenosis                                                         | 433.2          | I65.09 |
| Vertebral artery narrowing                                                        | 433.2          | I65.09 |
| Vertebral artery obstruction                                                      | 433.2          | I65.09 |
| Vertebral artery occlusion                                                        | 433.2          | I65.09 |
| Vertebral artery thrombosis                                                       | 433.2          | I65.09 |
| Occlusion and stenosis of vertebral artery                                        | 433.2          | I65.09 |
| Thrombosis, arteries, vertebral                                                   | 433.2          | I65.09 |
| Vertebral artery stenosis/occlusion                                               | 433.2          | I65.09 |
| Asymptomatic vertebral artery stenosis                                            | 433.2          | I65.09 |

|                                                                                                           |       |        |
|-----------------------------------------------------------------------------------------------------------|-------|--------|
| Symptomatic vertebral artery stenosis without infarction                                                  | 433.2 | I65.09 |
| Vertebral artery stenosis, symptomatic, without infarction                                                | 433.2 | I65.09 |
| Vertebral artery stenosis, asymptomatic                                                                   | 433.2 | I65.09 |
| Vertebral artery stenosis, non-symptomatic                                                                | 433.2 | I65.09 |
| Asymptomatic vertebral artery stenosis, unspecified laterality                                            | 433.2 | I65.09 |
| Symptomatic vertebral artery stenosis without infarction, unspecified laterality                          | 433.2 | I65.09 |
| Vertebral artery stenosis, asymptomatic, unspecified laterality                                           | 433.2 | I65.09 |
| Occlusion and stenosis of vertebral artery, unspecified laterality                                        | 433.2 | I65.09 |
| Vertebral artery thrombosis, unspecified laterality                                                       | 433.2 | I65.09 |
| Thrombosis, arteries, vertebral, unspecified laterality                                                   | 433.2 | I65.09 |
| Occlusion and stenosis of vertebral artery without mention of cerebral infarction, unspecified laterality | 433.2 | I65.09 |
| Vertebral artery stenosis, non-symptomatic, unspecified laterality                                        | 433.2 | I65.09 |
| Vertebral artery stenosis, symptomatic, without infarction, unspecified laterality                        | 433.2 | I65.09 |
| Vertebral artery narrowing, unspecified laterality                                                        | 433.2 | I65.09 |
| Vertebral artery obstruction, unspecified laterality                                                      | 433.2 | I65.09 |
| Vertebral artery stenosis, unspecified laterality                                                         | 433.2 | I65.09 |
| Vertebral artery stenosis/occlusion, unspecified laterality                                               | 433.2 | I65.09 |
| Occlusion of vertebral artery                                                                             | 433.2 | I65.09 |
| Vertebrobasilar artery stenosis, unspecified laterality                                                   | 433.3 | I65.09 |

|                                                                                                |       |        |
|------------------------------------------------------------------------------------------------|-------|--------|
| Occlusion of vertebral artery, unspecified laterality                                          | 433.2 | I65.09 |
| Vertebral artery occlusion, unspecified laterality                                             | 433.2 | I65.09 |
| Stenosis of vertebral artery without cerebral infarction                                       | 433.2 | I65.09 |
| Occlusion of vertebral artery without cerebral infarction                                      | 433.2 | I65.09 |
| Occlusion of vertebral artery without cerebral infarction, unspecified laterality              | 433.2 | I65.09 |
| Stenosis of vertebral artery without cerebral infarction, unspecified laterality               | 433.2 | I65.09 |
| Occlusion and stenosis of vertebral artery without cerebral infarction                         | 433.2 | I65.09 |
| Anterior spinal artery syndrome associated with thrombosis                                     | 433.8 | I65.09 |
| Occlusion and stenosis of vertebral artery without cerebral infarction, unspecified laterality | 433.2 | I65.09 |
| Vertebral art occ w/o infarct                                                                  | 433.2 | I65.09 |
| Occlusion and stenosis of unspecified vertebral artery                                         | 433.2 | I65.09 |
| Bow hunter's stroke                                                                            | 433.2 | I65.09 |
| Occlusion and stenosis of unspecified vertebral artery                                         |       | I65.09 |
| Occlusion and stenosis of basilar artery without mention of cerebral infarction                | 433   | I65.1  |
| Basilar artery stenosis                                                                        | 433   | I65.1  |
| Basilar artery narrowing                                                                       | 433   | I65.1  |
| Basilar artery obstruction                                                                     | 433   | I65.1  |
| Basilar artery occlusion                                                                       | 433   | I65.1  |
| Basilar artery thrombosis                                                                      | 433   | I65.1  |
| Occlusion and stenosis of basilar artery                                                       | 433   | I65.1  |
| Basilar artery stenosis/occlusion                                                              | 433   | I65.1  |
| Arteriosclerosis of basilar artery                                                             | 433   | I65.1  |
| Symptomatic basilar artery stenosis without infarction                                         | 433   | I65.1  |

|                                                                      |       |               |
|----------------------------------------------------------------------|-------|---------------|
| Basilar artery stenosis, symptomatic, without infarction             | 433   | I65.1         |
| Asymptomatic basilar artery stenosis                                 | 433   | I65.1         |
| Basilar artery stenosis, asymptomatic                                | 433   | I65.1         |
| Arteriosclerosis, basilar artery                                     | 433   | I65.1         |
| Basilar artery stenosis, non-symptomatic                             | 433   | I65.1         |
| Occlusion and stenosis basilar artery w/o mention cerebral infarct   | 433   | I65.1         |
| Basilar artery occlusion without cerebral infarction                 | 433   | I65.1         |
| Occlusion and stenosis of basilar artery without cerebral infarction | 433   | I65.1         |
| Basilar art occl w/o infarc                                          | 433   | I65.1         |
| Occlusion and stenosis of basilar artery                             |       | I65.1         |
| Vertebrobasilar artery stenosis                                      | 433.3 | I65.1, I65.09 |
| Occlusion and stenosis of carotid artery                             |       | I65.2         |
| Occlusion of right carotid artery                                    | 433.1 | I65.21        |
| Carotid occlusion, right                                             | 433.1 | I65.21        |
| Stenosis of right carotid artery                                     | 433.1 | I65.21        |
| Carotid stenosis, right                                              | 433.1 | I65.21        |
| Thrombosis of right carotid artery                                   | 433.1 | I65.21        |
| Carotid thrombosis, right                                            | 433.1 | I65.21        |
| Occlusion and stenosis of right carotid artery                       | 433.1 | I65.21        |
| Right carotid artery occlusion                                       | 433.1 | I65.21        |
| Atherosclerosis of right carotid artery                              | 433.1 | I65.21        |
| Right internal carotid occlusion                                     | 433.1 | I65.21        |
| Right cavernous carotid stenosis                                     | 433.1 | I65.21        |
| Stenosis of cavernous portion of right internal carotid artery       | 433.1 | I65.21        |
| Carotid artery stenosis, symptomatic, right                          | 433.1 | I65.21        |
| Carotid artery thrombosis, right                                     | 433.1 | I65.21        |
| Carotid artery obstruction, right                                    | 433.1 | I65.21        |
| Carotid artery stenosis, asymptomatic, right                         | 433.1 | I65.21        |
| Symptomatic carotid artery stenosis, right                           | 433.1 | I65.21        |



|                                                                                        |       |        |
|----------------------------------------------------------------------------------------|-------|--------|
| Unilateral carotid artery stenosis, right                                              | 433.1 | I65.21 |
| Common carotid artery stenosis, right                                                  | 433.1 | I65.21 |
| Symptomatic carotid artery stenosis without infarction, right                          | 433.1 | I65.21 |
| Carotid artery occlusion and stenosis, right                                           | 433.1 | I65.21 |
| Carotid atherosclerosis, right                                                         | 433.1 | I65.21 |
| Carotid stenosis, symptomatic w/o infarct, right                                       | 433.1 | I65.21 |
| Recurrent carotid stenosis, right                                                      | 433.1 | I65.21 |
| Carotid artery occlusion, right                                                        | 433.1 | I65.21 |
| Carotid stenosis, asymptomatic, right                                                  | 433.1 | I65.21 |
| Carotid stenosis, non-symptomatic, right                                               | 433.1 | I65.21 |
| Carotid artery stenosis, right                                                         | 433.1 | I65.21 |
| Carotid ulcer, right                                                                   | 433.1 | I65.21 |
| Carotid artery stenosis, unilateral, right                                             | 433.1 | I65.21 |
| Neck artery obstruction, right                                                         | 433.1 | I65.21 |
| Asymptomatic carotid artery narrowing without infarction, right                        | 433.1 | I65.21 |
| Internal carotid artery occlusion, right                                               | 433.1 | I65.21 |
| Carotid artery calcification, right                                                    | 433.1 | I65.21 |
| Asymptomatic carotid artery stenosis without infarction, right                         | 433.1 | I65.21 |
| Internal carotid artery stenosis, right                                                | 433.1 | I65.21 |
| ICAO (internal carotid artery occlusion), right                                        | 433.1 | I65.21 |
| Occlusion and stenosis of carotid artery without mention of cerebral infarction, right | 433.1 | I65.21 |
| Thrombosis of internal carotid, right                                                  | 433.1 | I65.21 |
| Asymptomatic carotid artery stenosis, right                                            | 433.1 | I65.21 |
| Internal carotid artery thrombosis, right                                              | 433.1 | I65.21 |
| Common carotid artery thrombosis, right                                                | 433.1 | I65.21 |
| Carotid artery occlusion without infarction, right                                     | 433.1 | I65.21 |
| Occlusion of carotid artery, right                                                     | 433.1 | I65.21 |

|                                                                  |       |        |
|------------------------------------------------------------------|-------|--------|
| Carotid artery stenosis and occlusion, right                     | 433.1 | I65.21 |
| Carotid artery narrowings, right                                 | 433.1 | I65.21 |
| Carotid artery narrowing, right                                  | 433.1 | I65.21 |
| Carotid thromboses, right                                        | 433.1 | I65.21 |
| Carotid artery plaque, right                                     | 433.1 | I65.21 |
| External carotid artery stenosis, right                          | 433.1 | I65.21 |
| External carotid artery thrombosis, right                        | 433.1 | I65.21 |
| Thrombosis of external carotid, right                            | 433.1 | I65.21 |
| Carotid artery, internal, occlusion, right                       | 433.1 | I65.21 |
| Intracranial carotid stenosis, right                             | 433.1 | I65.21 |
| Occlusion and stenosis of carotid artery, right                  | 433.1 | I65.21 |
| Symptomatic carotid artery narrowing without infarction, right   | 433.1 | I65.21 |
| Stenosis of carotid artery, right                                | 433.1 | I65.21 |
| Arteriosclerosis of carotid artery, right                        | 433.1 | I65.21 |
| Carotid artery stenosis without cerebral infarction, right       | 433.1 | I65.21 |
| Obstruction of carotid artery, right                             | 433.1 | I65.21 |
| Thrombosis of right common carotid artery                        | 433.1 | I65.21 |
| Stenosis of right carotid artery without cerebral infarction     | 433.1 | I65.21 |
| Asymptomatic stenosis of right carotid artery                    | 433.1 | I65.21 |
| Thrombosis of right external carotid artery                      | 433.1 | I65.21 |
| Symptomatic stenosis of right carotid artery                     | 433.1 | I65.21 |
| Asymptomatic stenosis of right carotid artery without infarction | 433.1 | I65.21 |
| Stenosis of right internal carotid artery                        | 433.1 | I65.21 |
| Obstruction of neck artery of right side                         | 433.1 | I65.21 |
| Occlusion of right internal carotid artery                       | 433.1 | I65.21 |
| Symptomatic stenosis of right carotid artery without infarction  | 433.1 | I65.21 |
| Arteriosclerosis of right carotid artery                         | 433.1 | I65.21 |

|                                                                    |       |        |
|--------------------------------------------------------------------|-------|--------|
| Thrombosis of right internal carotid artery                        | 433.1 | I65.21 |
| Calcification of right carotid artery                              | 433.1 | I65.21 |
| Recurrent stenosis of right carotid artery                         | 433.1 | I65.21 |
| Stenosis of intracranial portions of right internal carotid artery | 433.1 | I65.21 |
| Stenosis of right carotid artery without infarction                | 433.1 | I65.21 |
| Mild atherosclerosis of right carotid artery                       | 433.1 | I65.21 |
| Obstruction of right carotid artery                                | 433.1 | I65.21 |
| Obstruction of right carotid artery without cerebral infarction    | 433.1 | I65.21 |
| Right-sided carotid artery obstruction                             | 433.1 | I65.21 |
| Right-sided carotid artery obstruction without cerebral infarction | 433.1 | I65.21 |
| Right-sided extracranial carotid artery stenosis                   | 433.1 | I65.21 |
| Right-sided carotid artery occlusion without cerebral infarction   | 433.1 | I65.21 |
| Right-sided extracranial carotid artery occlusion                  | 433.1 | I65.21 |
| Mild atherosclerosis of carotid artery, right                      | 433.1 | I65.21 |
| Obstruction of carotid artery without cerebral infarction, right   | 433.1 | I65.21 |
| Greater than 50 percent stenosis of carotid artery, right          | 433.1 | I65.21 |
| Stenosis of extracranial carotid artery, right                     | 433.1 | I65.21 |
| Occlusion of carotid artery without cerebral infarction, right     | 433.1 | I65.21 |
| Occlusion of extracranial carotid artery, right                    | 433.1 | I65.21 |
| Stenosis of right external carotid artery                          | 433.1 | I65.21 |
| More than 50 percent stenosis of right internal carotid artery     | 433.1 | I65.21 |

|                                                                |       |        |
|----------------------------------------------------------------|-------|--------|
| Stenosis of right carotid artery greater than 50%              | 433.1 | I65.21 |
| Occlusion and stenosis of right carotid artery                 |       | I65.21 |
| Occlusion of left carotid artery                               | 433.1 | I65.22 |
| Carotid occlusion, left                                        | 433.1 | I65.22 |
| Stenosis of left carotid artery                                | 433.1 | I65.22 |
| Carotid stenosis, left                                         | 433.1 | I65.22 |
| Thrombosis of left carotid artery                              | 433.1 | I65.22 |
| Carotid thrombosis, left                                       | 433.1 | I65.22 |
| Left carotid artery stenosis                                   | 433.1 | I65.22 |
| Left carotid stenosis                                          | 433.1 | I65.22 |
| Occlusion and stenosis of left carotid artery                  | 433.1 | I65.22 |
| Left carotid artery occlusion                                  | 433.1 | I65.22 |
| Atherosclerosis of left carotid artery                         | 433.1 | I65.22 |
| Unilateral carotid artery stenosis, left                       | 433.1 | I65.22 |
| Occlusion and stenosis of carotid artery, left                 | 433.1 | I65.22 |
| Asymptomatic carotid artery stenosis without infarction, left  | 433.1 | I65.22 |
| Thrombosis of external carotid, left                           | 433.1 | I65.22 |
| Carotid artery thrombosis, left                                | 433.1 | I65.22 |
| Carotid artery stenosis and occlusion, left                    | 433.1 | I65.22 |
| Asymptomatic carotid artery narrowing without infarction, left | 433.1 | I65.22 |
| Carotid artery narrowings, left                                | 433.1 | I65.22 |
| Internal carotid artery stenosis, left                         | 433.1 | I65.22 |
| Symptomatic carotid artery narrowing without infarction, left  | 433.1 | I65.22 |
| Carotid ulcer, left                                            | 433.1 | I65.22 |
| Carotid artery stenosis, unilateral, left                      | 433.1 | I65.22 |
| Symptomatic carotid artery stenosis without infarction, left   | 433.1 | I65.22 |
| Carotid artery occlusion and stenosis, left                    | 433.1 | I65.22 |
| Thrombosis of internal carotid, left                           | 433.1 | I65.22 |
| Carotid atherosclerosis, left                                  | 433.1 | I65.22 |

|                                                                                       |       |        |
|---------------------------------------------------------------------------------------|-------|--------|
| Carotid stenosis, asymptomatic, left                                                  | 433.1 | I65.22 |
| Carotid artery calcification, left                                                    | 433.1 | I65.22 |
| Carotid artery occlusion, left                                                        | 433.1 | I65.22 |
| External carotid artery stenosis, left                                                | 433.1 | I65.22 |
| ICAO (internal carotid artery occlusion), left                                        | 433.1 | I65.22 |
| Carotid stenosis, symptomatic w/o infarct, left                                       | 433.1 | I65.22 |
| Internal carotid artery occlusion, left                                               | 433.1 | I65.22 |
| Neck artery obstruction, left                                                         | 433.1 | I65.22 |
| Common carotid artery thrombosis, left                                                | 433.1 | I65.22 |
| Symptomatic carotid artery stenosis, left                                             | 433.1 | I65.22 |
| Carotid artery stenosis, symptomatic, left                                            | 433.1 | I65.22 |
| Carotid thromboses, left                                                              | 433.1 | I65.22 |
| Stenosis of carotid artery, left                                                      | 433.1 | I65.22 |
| Carotid artery narrowing, left                                                        | 433.1 | I65.22 |
| Carotid artery stenosis, asymptomatic, left                                           | 433.1 | I65.22 |
| Carotid artery stenosis, left                                                         | 433.1 | I65.22 |
| Intracranial carotid stenosis, left                                                   | 433.1 | I65.22 |
| External carotid artery thrombosis, left                                              | 433.1 | I65.22 |
| Carotid artery, internal, occlusion, left                                             | 433.1 | I65.22 |
| Occlusion of carotid artery, left                                                     | 433.1 | I65.22 |
| Common carotid artery stenosis, left                                                  | 433.1 | I65.22 |
| Carotid artery obstruction, left                                                      | 433.1 | I65.22 |
| Internal carotid artery thrombosis, left                                              | 433.1 | I65.22 |
| Recurrent carotid stenosis, left                                                      | 433.1 | I65.22 |
| Carotid stenosis, non-symptomatic, left                                               | 433.1 | I65.22 |
| Carotid artery occlusion without infarction, left                                     | 433.1 | I65.22 |
| Carotid artery plaque, left                                                           | 433.1 | I65.22 |
| Occlusion and stenosis of carotid artery without mention of cerebral infarction, left | 433.1 | I65.22 |
| Asymptomatic carotid artery stenosis, left                                            | 433.1 | I65.22 |
| Arteriosclerosis of carotid artery, left                                              | 433.1 | I65.22 |
| Carotid artery stenosis without cerebral infarction, left                             | 433.1 | I65.22 |

|                                                                   |       |        |
|-------------------------------------------------------------------|-------|--------|
| Obstruction of carotid artery, left                               | 433.1 | I65.22 |
| Thrombosis of left internal carotid artery                        | 433.1 | I65.22 |
| Recurrent stenosis of left carotid artery                         | 433.1 | I65.22 |
| Obstruction of neck artery of left side                           | 433.1 | I65.22 |
| Calcification of left carotid artery                              | 433.1 | I65.22 |
| Occlusion of left internal carotid artery                         | 433.1 | I65.22 |
| Asymptomatic stenosis of left carotid artery                      | 433.1 | I65.22 |
| Symptomatic stenosis of left carotid artery without infarction    | 433.1 | I65.22 |
| Asymptomatic stenosis of left carotid artery without infarction   | 433.1 | I65.22 |
| Thrombosis of left common carotid artery                          | 433.1 | I65.22 |
| Arteriosclerosis of left carotid artery                           | 433.1 | I65.22 |
| Stenosis of left carotid artery without cerebral infarction       | 433.1 | I65.22 |
| Thrombosis of left external carotid artery                        | 433.1 | I65.22 |
| Stenosis of left internal carotid artery                          | 433.1 | I65.22 |
| Symptomatic stenosis of left carotid artery                       | 433.1 | I65.22 |
| Stenosis of intracranial portions of left internal carotid artery | 433.1 | I65.22 |
| Stenosis of left carotid artery without infarction                | 433.1 | I65.22 |
| Stenosis of cavernous portion of left internal carotid artery     | 433.1 | I65.22 |
| Left-sided carotid artery obstruction                             | 433.1 | I65.22 |
| Obstruction of left carotid artery without cerebral infarction    | 433.1 | I65.22 |
| Left-sided carotid artery obstruction without cerebral infarction | 433.1 | I65.22 |
| Mild atherosclerosis of left carotid artery                       | 433.1 | I65.22 |
| Obstruction of left carotid artery                                | 433.1 | I65.22 |
| Left-sided extracranial carotid artery stenosis                   | 433.1 | I65.22 |
| Left-sided carotid artery occlusion without cerebral infarction   | 433.1 | I65.22 |

|                                                                   |                |        |
|-------------------------------------------------------------------|----------------|--------|
| Left-sided extracranial carotid artery occlusion                  | 433.1          | I65.22 |
| Mild atherosclerosis of carotid artery, left                      | 433.1          | I65.22 |
| Occlusion of extracranial carotid artery, left                    | 433.1          | I65.22 |
| Stenosis of extracranial carotid artery, left                     | 433.1          | I65.22 |
| Greater than 50 percent stenosis of carotid artery, left          | 433.1          | I65.22 |
| Occlusion of carotid artery without cerebral infarction, left     | 433.1          | I65.22 |
| Obstruction of carotid artery without cerebral infarction, left   | 433.1          | I65.22 |
| Atherosclerosis of left common carotid artery                     | 433.1          | I65.22 |
| Stenosis of left external carotid artery                          | 433.1          | I65.22 |
| More than 50 percent stenosis of left internal carotid artery     | 433.1          | I65.22 |
| Stenosis of left carotid artery greater than 50%                  | 433.1          | I65.22 |
| Occlusion and stenosis of left carotid artery                     |                | I65.22 |
| Bilateral carotid artery stenosis                                 | 433.10, 433.30 | I65.23 |
| Carotid stenosis, bilateral                                       | 433.10, 433.30 | I65.23 |
| Narrowing of both carotid arteries                                | 433.10, 433.30 | I65.23 |
| Bilateral carotid artery occlusion                                | 433.10, 433.30 | I65.23 |
| Carotid occlusion, bilateral                                      | 433.10, 433.30 | I65.23 |
| Occlusion and stenosis of carotid arteries of both sides          | 433.10, 433.30 | I65.23 |
| Atherosclerosis of both carotid arteries                          | 433.10, 433.30 | I65.23 |
| Asymptomatic bilateral carotid artery stenosis                    | 433.10, 433.30 | I65.23 |
| Symptomatic carotid artery stenosis without infarction, bilateral | 433.10, 433.30 | I65.23 |
| Carotid artery occlusion and stenosis, bilateral                  | 433.1          | I65.23 |
| Unilateral carotid artery stenosis, bilateral                     | 433.1          | I65.23 |

|                                                                                            |                |        |
|--------------------------------------------------------------------------------------------|----------------|--------|
| Internal carotid artery thrombosis, bilateral                                              | 433.1          | I65.23 |
| Carotid artery narrowing, bilateral                                                        | 433.10, 433.30 | I65.23 |
| Occlusion and stenosis of carotid artery without mention of cerebral infarction, bilateral | 433.1          | I65.23 |
| Occlusion and stenosis of carotid artery, bilateral                                        | 433.1          | I65.23 |
| Carotid artery occlusion without infarction, bilateral                                     | 433.1          | I65.23 |
| Asymptomatic carotid artery stenosis, bilateral                                            | 433.10, 433.30 | I65.23 |
| Intracranial carotid stenosis, bilateral                                                   | 433.10, 433.30 | I65.23 |
| Occlusion of carotid artery, bilateral                                                     | 433.10, 433.30 | I65.23 |
| Recurrent carotid stenosis, bilateral                                                      | 433.10, 433.30 | I65.23 |
| Common carotid artery thrombosis, bilateral                                                | 433.1          | I65.23 |
| Carotid artery narrowings, bilateral                                                       | 433.10, 433.30 | I65.23 |
| Asymptomatic carotid artery stenosis without infarction, bilateral                         | 433.10, 433.30 | I65.23 |
| Carotid stenosis, non-symptomatic, bilateral                                               | 433.10, 433.30 | I65.23 |
| Stenosis of carotid artery, bilateral                                                      | 433.10, 433.30 | I65.23 |
| Internal carotid artery occlusion, bilateral                                               | 433.1          | I65.23 |
| Carotid thromboses, bilateral                                                              | 433.1          | I65.23 |
| Thrombosis of internal carotid, bilateral                                                  | 433.1          | I65.23 |
| Carotid artery occlusion, bilateral                                                        | 433.10, 433.30 | I65.23 |
| External carotid artery thrombosis, bilateral                                              | 433.1          | I65.23 |
| Carotid artery stenosis, symptomatic, bilateral                                            | 433.10, 433.30 | I65.23 |
| Carotid stenosis, asymptomatic, bilateral                                                  | 433.10, 433.30 | I65.23 |
| External carotid artery stenosis, bilateral                                                | 433.10, 433.30 | I65.23 |
| Carotid artery calcification, bilateral                                                    | 433.1          | I65.23 |
| Carotid ulcer, bilateral                                                                   | 433.10, 433.30 | I65.23 |
| Carotid artery stenosis and occlusion, bilateral                                           | 433.1          | I65.23 |



|                                                                     |                |        |
|---------------------------------------------------------------------|----------------|--------|
| Carotid stenosis, symptomatic w/o infarct, bilateral                | 433.10, 433.30 | I65.23 |
| Common carotid artery stenosis, bilateral                           | 433.10, 433.30 | I65.23 |
| Carotid artery stenosis, unilateral, bilateral                      | 433.1          | I65.23 |
| Carotid artery obstruction, bilateral                               | 433.10, 433.30 | I65.23 |
| Arteriosclerosis of carotid artery, bilateral                       | 433.10, 433.30 | I65.23 |
| Carotid artery thrombosis, bilateral                                | 433.1          | I65.23 |
| Carotid artery stenosis, asymptomatic, bilateral                    | 433.10, 433.30 | I65.23 |
| Neck artery obstruction, bilateral                                  | 433.1          | I65.23 |
| Asymptomatic carotid artery narrowing without infarction, bilateral | 433.10, 433.30 | I65.23 |
| Thrombosis of external carotid, bilateral                           | 433.1          | I65.23 |
| Carotid artery, internal, occlusion, bilateral                      | 433.1          | I65.23 |
| Symptomatic carotid artery narrowing without infarction, bilateral  | 433.10, 433.30 | I65.23 |
| Symptomatic carotid artery stenosis, bilateral                      | 433.10, 433.30 | I65.23 |
| Carotid thrombosis, bilateral                                       | 433.1          | I65.23 |
| Carotid atherosclerosis, bilateral                                  | 433.10, 433.30 | I65.23 |
| ICAO (internal carotid artery occlusion), bilateral                 | 433.1          | I65.23 |
| Carotid artery stenosis, bilateral                                  | 433.10, 433.30 | I65.23 |
| Internal carotid artery stenosis, bilateral                         | 433.10, 433.30 | I65.23 |
| Carotid artery plaque, bilateral                                    | 433.10, 433.30 | I65.23 |
| Carotid artery stenosis without cerebral infarction, bilateral      | 433.10, 433.30 | I65.23 |
| Obstruction of carotid artery, bilateral                            | 433.10, 433.30 | I65.23 |
| Thrombosis of both internal carotid arteries                        | 433.1          | I65.23 |
| Symptomatic stenosis of both carotid arteries                       | 433.10, 433.30 | I65.23 |
| Stenosis of both internal carotid arteries                          | 433.10, 433.30 | I65.23 |
| Stenosis of both carotid arteries without cerebral infarction       | 433.10, 433.30 | I65.23 |

|                                                                    |                |        |
|--------------------------------------------------------------------|----------------|--------|
| Symptomatic stenosis of both carotid arteries without infarction   | 433.10, 433.30 | I65.23 |
| Thrombosis of both carotid arteries                                | 433.1          | I65.23 |
| Occlusion of both internal carotid arteries                        | 433.1          | I65.23 |
| Thrombosis of both external carotid arteries                       | 433.1          | I65.23 |
| Arteriosclerosis of both carotid arteries                          | 433.10, 433.30 | I65.23 |
| Thrombosis of both common carotid arteries                         | 433.1          | I65.23 |
| Calcification of both carotid arteries                             | 433.1          | I65.23 |
| Recurrent stenosis of both carotid arteries                        | 433.10, 433.30 | I65.23 |
| Obstruction of neck artery of both sides                           | 433.1          | I65.23 |
| Asymptomatic stenosis of both carotid arteries without infarction  | 433.10, 433.30 | I65.23 |
| Stenosis of intracranial portion of both internal carotid arteries | 433.10, 433.30 | I65.23 |
| Stenosis of both carotid arteries without infarction               | 433.10, 433.30 | I65.23 |
| Bilateral carotid artery stenosis without cerebral infarction      | 433.10, 433.30 | I65.23 |
| Mild atherosclerosis of both carotid arteries                      | 433.1          | I65.23 |
| Bilateral carotid artery obstruction without cerebral infarction   | 433.1          | I65.23 |
| Bilateral extracranial carotid artery stenosis                     | 433.1          | I65.23 |
| Bilateral carotid artery occlusion without cerebral infarction     | 433.10, 433.30 | I65.23 |
| Bilateral extracranial carotid artery occlusion                    | 433.10, 433.30 | I65.23 |
| Obstruction of carotid artery on both sides                        | 433.10, 433.30 | I65.23 |
| Mild atherosclerosis of carotid artery, bilateral                  | 433.1          | I65.23 |
| Occlusion of extracranial carotid artery, bilateral                | 433.10, 433.30 | I65.23 |

|                                                                                 |                |        |
|---------------------------------------------------------------------------------|----------------|--------|
| Stenosis of extracranial carotid artery, bilateral                              | 433.1          | I65.23 |
| Occlusion of carotid artery without cerebral infarction, bilateral              | 433.10, 433.30 | I65.23 |
| Greater than 50 percent stenosis of carotid artery, bilateral                   | 433.1          | I65.23 |
| Obstruction of carotid artery without cerebral infarction, bilateral            | 433.1          | I65.23 |
| Stenosis of both external carotid arteries                                      | 433.3          | I65.23 |
| Occlusion and stenosis of bilateral carotid arteries                            | 433.10, 433.30 | I65.23 |
| Bilateral stenosis of carotid arteries greater than 50%                         | 433.1          | I65.23 |
| Occlusion and stenosis of bilateral carotid arteries                            |                | I65.23 |
| Occlusion and stenosis of carotid artery without mention of cerebral infarction | 433.1          | I65.29 |
| Carotid artery stenosis                                                         | 433.1          | I65.29 |
| Carotid artery narrowing                                                        | 433.1          | I65.29 |
| Carotid artery obstruction                                                      | 433.1          | I65.29 |
| Carotid artery occlusion                                                        | 433.1          | I65.29 |
| Carotid artery thrombosis                                                       | 433.1          | I65.29 |
| Occlusion and stenosis of carotid artery                                        | 433.1          | I65.29 |
| Carotid thrombosis                                                              | 433.1          | I65.29 |
| Internal carotid artery occlusion                                               | 433.1          | I65.29 |
| ICAO (internal carotid artery occlusion)                                        | 433.1          | I65.29 |
| Carotid stenosis                                                                | 433.1          | I65.29 |
| External carotid artery thrombosis                                              | 433.1          | I65.29 |
| Common carotid artery thrombosis                                                | 433.1          | I65.29 |
| Internal carotid artery thrombosis                                              | 433.1          | I65.29 |
| Carotid thromboses                                                              | 433.1          | I65.29 |
| External carotid artery stenosis                                                | 433.1          | I65.29 |
| Internal carotid artery stenosis                                                | 433.1          | I65.29 |
| Carotid artery narrowings                                                       | 433.1          | I65.29 |
| Common carotid artery stenosis                                                  | 433.1          | I65.29 |
| Carotid artery plaque                                                           | 433.1          | I65.29 |
| Carotid artery, internal, occlusion                                             | 433.1          | I65.29 |

|                                                                     |       |        |
|---------------------------------------------------------------------|-------|--------|
| Carotid atherosclerosis                                             | 433.1 | I65.29 |
| Symptomatic carotid artery stenosis without infarction              | 433.1 | I65.29 |
| Symptomatic carotid artery narrowing without infarction             | 433.1 | I65.29 |
| Asymptomatic carotid artery stenosis without infarction             | 433.1 | I65.29 |
| Asymptomatic carotid artery narrowing without infarction            | 433.1 | I65.29 |
| Carotid artery stenosis and occlusion                               | 433.1 | I65.29 |
| Carotid artery occlusion and stenosis                               | 433.1 | I65.29 |
| Neck artery obstruction                                             | 433.1 | I65.29 |
| Carotid artery occlusion without infarction                         | 433.1 | I65.29 |
| Carotid artery stenosis, unilateral                                 | 433.1 | I65.29 |
| Unilateral carotid artery stenosis                                  | 433.1 | I65.29 |
| Asymptomatic carotid artery stenosis                                | 433.1 | I65.29 |
| Carotid artery stenosis, asymptomatic                               | 433.1 | I65.29 |
| Intracranial carotid stenosis                                       | 433.1 | I65.29 |
| Recurrent carotid stenosis                                          | 433.1 | I65.29 |
| Carotid artery calcification                                        | 433.1 | I65.29 |
| Carotid stenosis, non-symptomatic                                   | 433.1 | I65.29 |
| Carotid stenosis, symptomatic w/o infarct                           | 433.1 | I65.29 |
| Thrombosis of external carotid                                      | 433.1 | I65.29 |
| Thrombosis of internal carotid                                      | 433.1 | I65.29 |
| Carotid stenosis, asymptomatic                                      | 433.1 | I65.29 |
| Occlusion of carotid artery                                         | 433.1 | I65.29 |
| Stenosis of carotid artery                                          | 433.1 | I65.29 |
| Symptomatic carotid artery stenosis                                 | 433.1 | I65.29 |
| Carotid artery stenosis, symptomatic                                | 433.1 | I65.29 |
| Carotid artery stenosis and occlusion, unspecified laterality       | 433.1 | I65.29 |
| Carotid artery stenosis, unspecified laterality                     | 433.1 | I65.29 |
| Carotid artery occlusion without infarction, unspecified laterality | 433.1 | I65.29 |

|                                                                                                         |       |        |
|---------------------------------------------------------------------------------------------------------|-------|--------|
| Thrombosis of external carotid, unspecified laterality                                                  | 433.1 | I65.29 |
| Occlusion and stenosis of carotid artery without mention of cerebral infarction, unspecified laterality | 433.1 | I65.29 |
| Symptomatic carotid artery stenosis without infarction, unspecified laterality                          | 433.1 | I65.29 |
| Carotid ulcer, unspecified laterality                                                                   | 433.1 | I65.29 |
| Carotid artery calcification, unspecified laterality                                                    | 433.1 | I65.29 |
| Stenosis of carotid artery, unspecified laterality                                                      | 433.1 | I65.29 |
| Recurrent carotid stenosis, unspecified laterality                                                      | 433.1 | I65.29 |
| Unilateral carotid artery stenosis, unspecified laterality                                              | 433.1 | I65.29 |
| Carotid artery, internal, occlusion, unspecified laterality                                             | 433.1 | I65.29 |
| External carotid artery thrombosis, unspecified laterality                                              | 433.1 | I65.29 |
| Carotid stenosis, unspecified laterality                                                                | 433.1 | I65.29 |
| Carotid artery occlusion and stenosis, unspecified laterality                                           | 433.1 | I65.29 |
| Asymptomatic carotid artery narrowing without infarction, unspecified laterality                        | 433.1 | I65.29 |
| Internal carotid artery stenosis, unspecified laterality                                                | 433.1 | I65.29 |
| Occlusion of carotid artery, unspecified laterality                                                     | 433.1 | I65.29 |
| Carotid artery stenosis, symptomatic, unspecified laterality                                            | 433.1 | I65.29 |
| Carotid artery thrombosis, unspecified laterality                                                       | 433.1 | I65.29 |
| Carotid thrombosis, unspecified laterality                                                              | 433.1 | I65.29 |
| Carotid artery plaque, unspecified laterality                                                           | 433.1 | I65.29 |

|                                                                                 |       |        |
|---------------------------------------------------------------------------------|-------|--------|
| Carotid artery narrowing, unspecified laterality                                | 433.1 | I65.29 |
| Carotid artery stenosis, unilateral, unspecified laterality                     | 433.1 | I65.29 |
| ICAO (internal carotid artery occlusion), unspecified laterality                | 433.1 | I65.29 |
| Symptomatic carotid artery stenosis, unspecified laterality                     | 433.1 | I65.29 |
| Carotid artery narrowings, unspecified laterality                               | 433.1 | I65.29 |
| Occlusion and stenosis of carotid artery, unspecified laterality                | 433.1 | I65.29 |
| Carotid artery obstruction, unspecified laterality                              | 433.1 | I65.29 |
| Intracranial carotid stenosis, unspecified laterality                           | 433.1 | I65.29 |
| Neck artery obstruction, unspecified laterality                                 | 433.1 | I65.29 |
| Carotid thromboses, unspecified laterality                                      | 433.1 | I65.29 |
| Carotid artery stenosis, asymptomatic, unspecified laterality                   | 433.1 | I65.29 |
| Thrombosis of internal carotid, unspecified laterality                          | 433.1 | I65.29 |
| Common carotid artery stenosis, unspecified laterality                          | 433.1 | I65.29 |
| Carotid stenosis, asymptomatic, unspecified laterality                          | 433.1 | I65.29 |
| Common carotid artery thrombosis, unspecified laterality                        | 433.1 | I65.29 |
| Carotid stenosis, non-symptomatic, unspecified laterality                       | 433.1 | I65.29 |
| Internal carotid artery occlusion, unspecified laterality                       | 433.1 | I65.29 |
| Asymptomatic carotid artery stenosis without infarction, unspecified laterality | 433.1 | I65.29 |
| Internal carotid artery thrombosis, unspecified laterality                      | 433.1 | I65.29 |

|                                                                                 |       |        |
|---------------------------------------------------------------------------------|-------|--------|
| Asymptomatic carotid artery stenosis, unspecified laterality                    | 433.1 | I65.29 |
| Carotid artery occlusion, unspecified laterality                                | 433.1 | I65.29 |
| Symptomatic carotid artery narrowing without infarction, unspecified laterality | 433.1 | I65.29 |
| Carotid stenosis, symptomatic w/o infarct, unspecified laterality               | 433.1 | I65.29 |
| Carotid atherosclerosis, unspecified laterality                                 | 433.1 | I65.29 |
| External carotid artery stenosis, unspecified laterality                        | 433.1 | I65.29 |
| Arteriosclerosis of carotid artery                                              | 433.1 | I65.29 |
| Arteriosclerosis of carotid artery, unspecified laterality                      | 433.1 | I65.29 |
| Carotid artery stenosis without infarction                                      | 433.1 | I65.29 |
| Carotid artery stenosis without cerebral infarction                             | 433.1 | I65.29 |
| Obstruction of carotid artery                                                   | 433.1 | I65.29 |
| Obstruction of carotid artery without cerebral infarction                       | 433.1 | I65.29 |
| Occlusion of carotid artery without cerebral infarction                         | 433.1 | I65.29 |
| Carotid artery stenosis without cerebral infarction, unspecified laterality     | 433.1 | I65.29 |
| Obstruction of carotid artery, unspecified laterality                           | 433.1 | I65.29 |
| Occlusion of extracranial carotid artery                                        | 433.1 | I65.29 |
| Stenosis of extracranial carotid artery                                         | 433.1 | I65.29 |
| Greater than 50 percent stenosis of carotid artery                              | 433.1 | I65.29 |
| Mild atherosclerosis of carotid artery                                          | 433.1 | I65.29 |
| Mild atherosclerosis of carotid artery, unspecified laterality                  | 433.1 | I65.29 |
| Greater than 50 percent stenosis of carotid artery, unspecified laterality      | 433.1 | I65.29 |

|                                                                                                              |       |        |
|--------------------------------------------------------------------------------------------------------------|-------|--------|
| Stenosis of extracranial carotid artery, unspecified laterality                                              | 433.1 | I65.29 |
| Occlusion of extracranial carotid artery, unspecified laterality                                             | 433.1 | I65.29 |
| Occlusion of carotid artery without cerebral infarction, unspecified laterality                              | 433.1 | I65.29 |
| Obstruction of carotid artery without cerebral infarction, unspecified laterality                            | 433.1 | I65.29 |
| Carotid art occ w/o infarc                                                                                   | 433.1 | I65.29 |
| Stenosis of external carotid artery                                                                          | 433.1 | I65.29 |
| Occlusion and stenosis of unspecified carotid artery                                                         | 433.1 | I65.29 |
| Occlusion and stenosis of unspecified carotid artery                                                         |       | I65.29 |
| Occlusion and stenosis of multiple and bilateral precerebral arteries without mention of cerebral infarction | 433.3 | I65.8  |
| Occlusion and stenosis of other specified precerebral artery without mention of cerebral infarction          | 433.8 | I65.8  |
| Multiple and bilateral precerebral artery obstruction                                                        | 433.3 | I65.8  |
| Occlusion and stenosis of multiple and bilateral precerebral arteries                                        | 433.3 | I65.8  |
| Precerebral artery stenosis/occlusion, multiple/bilateral                                                    | 433.3 | I65.8  |
| Multiple and bilateral precerebral artery stenosis without infarction                                        | 433.3 | I65.8  |
| Occlusion and stenosis of other specified precerebral artery                                                 | 433.8 | I65.8  |
| Other precerebral occ w/o infarc                                                                             | 433.8 | I65.8  |
| Occlusion and stenosis of other precerebral arteries                                                         | 433.8 | I65.8  |
| Occlusion and stenosis of other precerebral arteries (CODE)                                                  | 433.8 | I65.8  |
| Occlusion and stenosis of other precerebral arteries                                                         |       | I65.8  |



|                                                                                                 |       |       |
|-------------------------------------------------------------------------------------------------|-------|-------|
| Pontine artery thrombosis                                                                       | 433.8 | 165.8 |
| Pontine artery occlusion                                                                        | 433.8 | 165.8 |
| Occlusion of pontine artery                                                                     | 433.8 | 165.8 |
| Multiple and bilateral precerebral artery stenosis                                              | 433.3 | 165.9 |
| Occlusion and stenosis of unspecified precerebral artery without mention of cerebral infarction | 433.9 | 165.9 |
| Stenosis of precerebral artery                                                                  | 433.9 | 165.9 |
| Narrowing of precerebral artery                                                                 | 433.9 | 165.9 |
| Obstruction of precerebral artery                                                               | 433.9 | 165.9 |
| Occlusion of precerebral artery                                                                 | 433.9 | 165.9 |
| Thrombosis of precerebral artery                                                                | 433.9 | 165.9 |
| Multiple and bilateral precerebral artery thrombosis                                            | 433.3 | 165.9 |
| Occlusion and stenosis of precerebral artery                                                    | 433.9 | 165.9 |
| Multiple precerebral artery occlusions without cerebral infarction                              | 433.3 | 165.9 |
| Precerebral occlusion                                                                           | 433.9 | 165.9 |
| Precerebral artery stenosis/occlusion                                                           | 433.9 | 165.9 |
| Asymptomatic stenosis of precerebral artery                                                     | 433.9 | 165.9 |
| Precerebral artery stenosis, multiple or bilateral, non-symptomatic                             | 433.3 | 165.9 |
| Precerebral artery stenosis, asymptomatic                                                       | 433.9 | 165.9 |
| Extra-cranial artery stenosis, asymptomatic                                                     | 433.9 | 165.9 |
| Precerebral artery occlusion                                                                    | 433.9 | 165.9 |
| Extra-cranial artery stenosis, multiple or bilateral, asymptomatic                              | 433.3 | 165.9 |
| Extracranial artery stenosis and occlusion                                                      | 433.9 | 165.9 |
| Occlusion and stenosis of precerebral arteries                                                  | 433.9 | 165.9 |
| Occlusion and stenosis of unspecified precerebral artery                                        | 433.9 | 165.9 |

|                                                                                   |       |        |
|-----------------------------------------------------------------------------------|-------|--------|
| Multiple and bilateral precerebral arterial occlusion                             | 433.3 | I65.9  |
| Occlusion and stenosis of precerebral artery without cerebral infarction          | 433.9 | I65.9  |
| Mult precerebral occ w/o infarc                                                   | 433.3 | I65.9  |
| Precerebral occl w/o infarct                                                      | 433.9 | I65.9  |
| Occlusion and stenosis of unspecified precerebral artery                          |       | I65.9  |
| Occlusion and stenosis of cerebral arteries, not resulting in cerebral infarction |       | I66    |
| Occlusion and stenosis of middle cerebral artery                                  |       | I66.0  |
| Occlusion and stenosis of right middle cerebral artery                            | 434.9 | I66.01 |
| Occlusion and stenosis of middle cerebral artery, right                           | 434.9 | I66.01 |
| Middle cerebral artery stenosis, right                                            | 437   | I66.01 |
| Stenosis of middle cerebral artery, right                                         | 437   | I66.01 |
| Occlusion or stenosis of middle cerebral artery without infarction, right         | 434.9 | I66.01 |
| Thrombosis of middle cerebral artery, right                                       | 434   | I66.01 |
| Occlusion of middle cerebral artery, right                                        | 434.9 | I66.01 |
| Stenosis of right middle cerebral artery                                          | 437   | I66.01 |
| Thrombosis of right middle cerebral artery                                        | 434   | I66.01 |
| Occlusion of right middle cerebral artery                                         | 434.9 | I66.01 |
| Stenosis of right middle cerebral artery not resulting in cerebral infarction     | 434.9 | I66.01 |
| Occlusion of right middle cerebral artery not resulting in cerebral infarction    | 434.9 | I66.01 |
| Occlusion and stenosis of right middle cerebral artery                            |       | I66.01 |
| Occlusion and stenosis of left middle cerebral artery                             | 434.9 | I66.02 |
| Middle cerebral artery stenosis, left                                             | 437   | I66.02 |

|                                                                                 |       |        |
|---------------------------------------------------------------------------------|-------|--------|
| Occlusion or stenosis of middle cerebral artery without infarction, left        | 434.9 | I66.02 |
| Occlusion and stenosis of middle cerebral artery, left                          | 434.9 | I66.02 |
| Stenosis of middle cerebral artery, left                                        | 437   | I66.02 |
| Thrombosis of middle cerebral artery, left                                      | 434   | I66.02 |
| Occlusion of middle cerebral artery, left                                       | 434.9 | I66.02 |
| Thrombosis of left middle cerebral artery                                       | 434   | I66.02 |
| Stenosis of left middle cerebral artery                                         | 437   | I66.02 |
| Occlusion of left middle cerebral artery                                        | 434.9 | I66.02 |
| Stenosis of left middle cerebral artery not resulting in cerebral infarction    | 434.9 | I66.02 |
| Occlusion of left middle cerebral artery not resulting in cerebral infarction   | 434.9 | I66.02 |
| Occlusion and stenosis of left middle cerebral artery                           |       | I66.02 |
| Occlusion and stenosis of both middle cerebral arteries                         | 434.9 | I66.03 |
| Stenosis of middle cerebral artery, bilateral                                   | 437   | I66.03 |
| Middle cerebral artery stenosis, bilateral                                      | 437   | I66.03 |
| Occlusion and stenosis of middle cerebral artery, bilateral                     | 434.9 | I66.03 |
| Occlusion or stenosis of middle cerebral artery without infarction, bilateral   | 434.9 | I66.03 |
| Thrombosis of middle cerebral artery, bilateral                                 | 434   | I66.03 |
| Occlusion of middle cerebral artery, bilateral                                  | 434.9 | I66.03 |
| Occlusion of both middle cerebral arteries                                      | 434.9 | I66.03 |
| Stenosis of both middle cerebral arteries                                       | 437   | I66.03 |
| Thrombosis of both middle cerebral arteries                                     | 434   | I66.03 |
| Stenosis of both middle cerebral arteries not resulting in cerebral infarction  | 434.9 | I66.03 |
| Occlusion of both middle cerebral arteries not resulting in cerebral infarction | 434.9 | I66.03 |

|                                                                                            |       |        |
|--------------------------------------------------------------------------------------------|-------|--------|
| Bilateral occlusion of middle cerebral arteries not resulting in cerebral infarction       | 434.9 | I66.03 |
| Bilateral stenosis of middle cerebral arteries not resulting in cerebral infarction        | 434.9 | I66.03 |
| Occlusion and stenosis of bilateral middle cerebral arteries                               | 434.9 | I66.03 |
| Occlusion and stenosis of bilateral middle cerebral arteries                               |       | I66.03 |
| Occlusion and stenosis of middle cerebral artery                                           | 434.9 | I66.09 |
| Stenosis of middle cerebral artery                                                         | 437   | I66.09 |
| Middle cerebral artery stenosis                                                            | 437   | I66.09 |
| Occlusion or stenosis of middle cerebral artery without infarction                         | 434.9 | I66.09 |
| Occlusion and stenosis of middle cerebral artery, unspecified laterality                   | 434.9 | I66.09 |
| Middle cerebral artery stenosis, unspecified laterality                                    | 437   | I66.09 |
| Occlusion or stenosis of middle cerebral artery without infarction, unspecified laterality | 434.9 | I66.09 |
| Stenosis of middle cerebral artery, unspecified laterality                                 | 437   | I66.09 |
| Thrombosis of middle cerebral artery                                                       | 434   | I66.09 |
| Thrombosis of middle cerebral artery, unspecified laterality                               | 434   | I66.09 |
| Occlusion of middle cerebral artery                                                        | 434.9 | I66.09 |
| Occlusion of middle cerebral artery, unspecified laterality                                | 434.9 | I66.09 |
| Occlusion and stenosis of unspecified middle cerebral artery                               | 434.9 | I66.09 |
| Occlusion and stenosis of unspecified middle cerebral artery                               |       | I66.09 |
| Occlusion and stenosis of anterior cerebral artery                                         |       | I66.1  |

|                                                                            |       |        |
|----------------------------------------------------------------------------|-------|--------|
| Occlusion and stenosis of right anterior cerebral artery                   | 434.9 | I66.11 |
| Occlusion and stenosis of anterior cerebral artery, right                  | 434.9 | I66.11 |
| Thrombosis of anterior cerebral artery, right                              | 434   | I66.11 |
| Thrombosis of right anterior cerebral artery                               | 434   | I66.11 |
| Occlusion and stenosis of right anterior cerebral artery                   |       | I66.11 |
| Occlusion and stenosis of left anterior cerebral artery                    | 434.9 | I66.12 |
| Occlusion and stenosis of anterior cerebral artery, left                   | 434.9 | I66.12 |
| Thrombosis of anterior cerebral artery, left                               | 434   | I66.12 |
| Thrombosis of left anterior cerebral artery                                | 434   | I66.12 |
| Occlusion and stenosis of left anterior cerebral artery                    |       | I66.12 |
| Occlusion and stenosis of both anterior cerebral arteries                  | 434.9 | I66.13 |
| Thrombosis of anterior cerebral artery, bilateral                          | 434   | I66.13 |
| Occlusion and stenosis of anterior cerebral artery, bilateral              | 434.9 | I66.13 |
| Thrombosis of both anterior cerebral arteries                              | 434   | I66.13 |
| Occlusion and stenosis of bilateral anterior cerebral arteries             | 434.9 | I66.13 |
| Occlusion and stenosis of bilateral anterior cerebral arteries             |       | I66.13 |
| Occlusion and stenosis of anterior cerebral artery                         | 434.9 | I66.19 |
| Occlusion and stenosis of anterior cerebral artery, unspecified laterality | 434.9 | I66.19 |
| Thrombosis of anterior cerebral artery                                     | 434   | I66.19 |

|                                                                              |       |        |
|------------------------------------------------------------------------------|-------|--------|
| Thrombosis of anterior cerebral artery, unspecified laterality               | 434   | I66.19 |
| Occlusion and stenosis of unspecified anterior cerebral artery               | 434.9 | I66.19 |
| Occlusion and stenosis of unspecified anterior cerebral artery               |       | I66.19 |
| Occlusion and stenosis of posterior cerebral artery                          |       | I66.2  |
| Occlusion and stenosis of right posterior cerebral artery                    | 434.9 | I66.21 |
| Occlusion or stenosis of posterior cerebral artery without infarction, right | 437   | I66.21 |
| Occlusion and stenosis of posterior cerebral artery, right                   | 434.9 | I66.21 |
| Thrombosis of posterior cerebral artery, right                               | 434   | I66.21 |
| Thrombosis of right posterior cerebral artery                                | 434   | I66.21 |
| Occlusion and stenosis of right posterior cerebral artery                    |       | I66.21 |
| Occlusion and stenosis of left posterior cerebral artery                     | 434.9 | I66.22 |
| Occlusion or stenosis of posterior cerebral artery without infarction, left  | 437   | I66.22 |
| Occlusion and stenosis of posterior cerebral artery, left                    | 434.9 | I66.22 |
| Thrombosis of posterior cerebral artery, left                                | 434   | I66.22 |
| Posterior cerebral artery embolism, left                                     | 434.1 | I66.22 |
| Thrombosis of left posterior cerebral artery                                 | 434   | I66.22 |
| Occlusion and stenosis of left posterior cerebral artery                     |       | I66.22 |
| Occlusion and stenosis of both posterior cerebral arteries                   | 434.9 | I66.23 |
| Thrombosis of posterior cerebral artery, bilateral                           | 434   | I66.23 |

|                                                                                               |       |        |
|-----------------------------------------------------------------------------------------------|-------|--------|
| Occlusion or stenosis of posterior cerebral artery without infarction, bilateral              | 437   | I66.23 |
| Occlusion and stenosis of posterior cerebral artery, bilateral                                | 434.9 | I66.23 |
| Posterior cerebral artery embolism, bilateral                                                 | 434.1 | I66.23 |
| Thrombosis of both posterior cerebral arteries                                                | 434   | I66.23 |
| Occlusion and stenosis of bilateral posterior cerebral arteries                               | 434.9 | I66.23 |
| Occlusion and stenosis of bilateral posterior cerebral arteries                               |       | I66.23 |
| Occlusion and stenosis of posterior cerebral artery                                           | 434.9 | I66.29 |
| Occlusion or stenosis of posterior cerebral artery without infarction                         | 437   | I66.29 |
| Occlusion or stenosis of posterior cerebral artery without infarction, unspecified laterality | 437   | I66.29 |
| Occlusion and stenosis of posterior cerebral artery, unspecified laterality                   | 434.9 | I66.29 |
| Thrombosis of posterior cerebral artery                                                       | 434   | I66.29 |
| Thrombosis of posterior cerebral artery, unspecified laterality                               | 434   | I66.29 |
| Occlusion and stenosis of unspecified posterior cerebral artery                               | 434.9 | I66.29 |
| Occlusion and stenosis of unspecified posterior cerebral artery                               |       | I66.29 |
| Occlusion and stenosis of cerebellar arteries                                                 | 433.8 | I66.3  |
| Cerebellar artery occlusion or stenosis                                                       | 433.8 | I66.3  |
| Thrombosis of anterior inferior cerebellar artery                                             | 433.8 | I66.3  |
| Thrombosis of posterior inferior cerebellar artery                                            | 433.8 | I66.3  |
| Thrombosis of superior cerebellar artery                                                      | 433.8 | I66.3  |

|                                                                              |       |       |
|------------------------------------------------------------------------------|-------|-------|
| Cerebellar artery thrombosis                                                 | 433.8 | 166.3 |
| Cerebellar artery occlusion                                                  | 433.8 | 166.3 |
| Occlusion of cerebellar artery                                               | 433.8 | 166.3 |
| Thrombosis of cerebellar artery                                              | 433.8 | 166.3 |
| Occlusion and stenosis of cerebellar arteries                                |       | 166.3 |
| Occlusion and stenosis of other cerebral arteries                            | 434.9 | 166.8 |
| Occlusion and stenosis of other cerebral arteries (CODE)                     | 434.9 | 166.8 |
| Occlusion and stenosis of other cerebral arteries                            |       | 166.8 |
| Cerebral thrombosis without mention of cerebral infarction                   | 434   | 166.9 |
| Unspecified cerebral artery occlusion without mention of cerebral infarction | 434.9 | 166.9 |
| Cerebral artery occlusion                                                    | 434.9 | 166.9 |
| Thrombosis of cerebral arteries                                              | 434   | 166.9 |
| Occlusion, artery, cerebral                                                  | 434.9 | 166.9 |
| Occlusion, cerebral artery                                                   | 434.9 | 166.9 |
| Cerebral thrombosis                                                          | 434   | 166.9 |
| Blood clots in brain                                                         | 434   | 166.9 |
| Cerebral arterial thrombosis                                                 | 434   | 166.9 |
| Cerebral artery occlusion syndrome                                           | 434.9 | 166.9 |
| CT (cerebral thrombosis)                                                     | 434   | 166.9 |
| Cerebrovascular occlusion                                                    | 434.9 | 166.9 |
| Occlusion of cerebral arteries                                               | 434.9 | 166.9 |
| Asymptomatic cerebral artery occlusion                                       | 434.9 | 166.9 |
| Cerebral thrombosis with transient symptoms                                  | 434   | 166.9 |
| Occlusion or stenosis of cerebral artery without infarction                  | 434.9 | 166.9 |
| Cerebral artery occlusion, asymptomatic                                      | 434.9 | 166.9 |
| Occlusion or stenosis of multiple cerebral arteries                          | 434.9 | 166.9 |
| Occlusion and stenosis of cerebral artery                                    | 434.9 | 166.9 |



|                                                              |               |               |
|--------------------------------------------------------------|---------------|---------------|
| Cerebral artery occlusion, non-symptomatic                   | 434.9         | 166.9         |
| Cerebral thrombosis with transient ischemic attack (TIA)     | 434           | 166.9         |
| Unspecified cerebral artery occlusion                        | 434.9         | 166.9         |
| Cerebral artery occlusion without cerebral infarction        | 434.9         | 166.9         |
| Cerebral thrombosis without cerebral infarction              | 434           | 166.9         |
| Cerebral art occ w/o infarc                                  | 434.9         | 166.9         |
| Stenosis of intracranial vessel                              | 437           | 166.9         |
| Occlusion and stenosis of unspecified cerebral artery        | 434.9         | 166.9         |
| Occlusion and stenosis of unspecified cerebral artery        |               | 166.9         |
| Other cerebrovascular diseases                               |               | 167           |
| Dissection of cerebral arteries, nonruptured                 | 443.29        | 167.0         |
| Dissection of intracranial artery                            | 443.29        | 167.0         |
| Dissection of cerebral artery                                | 443.29        | 167.0         |
| Dissection of cerebral arteries, nonruptured                 |               | 167.0         |
| Cerebral atherosclerosis                                     | 437           | 167.2         |
| Atheroma of cerebral arteries                                | 437           | 167.2         |
| Cerebral arteriosclerosis                                    | 437           | 167.2         |
| Cerebrovascular arteriosclerosis                             | 437           | 167.2         |
| Atherosclerotic cerebrovascular disease                      | 437           | 167.2         |
| CAS (cerebral atherosclerosis)                               | 437           | 167.2         |
| Intracranial arteriosclerosis                                | 437           | 167.2         |
| Intracranial atherosclerosis                                 | 437           | 167.2         |
| Hardening of the arteries of the brain                       | 437           | 167.2         |
| Arteriosclerosis of cerebral artery                          | 437           | 167.2         |
| Arteriosclerotic leukoencephalopathy                         | 437.0, 323.81 | 167.2         |
| Arteriosclerotic cerebrovascular disease                     | 437           | 167.2         |
| Cerebral atherosclerosis                                     |               | 167.2         |
| Dementia due to arteriosclerosis with behavioral disturbance | 290.40, 437.0 | 167.2, F01.51 |

|                                                                                                        |                      |                     |
|--------------------------------------------------------------------------------------------------------|----------------------|---------------------|
| Dementia due to atherosclerosis with behavioral disturbance                                            | 290.40, 437.0        | I67.2, F01.51       |
| Familial arteriosclerotic leukoencephalopathy with alopecia and lumbago, without arterial hypertension | 437.0, 704.00, 724.2 | I67.2, L65.9, M54.5 |
| Cerebral arteriosclerosis with history of previous stroke                                              | 437.0, V12.54        | I67.2, Z86.73       |
| Cerebrovascular disease, arteriosclerotic, post-stroke                                                 | 437.0, V12.54        | I67.2, Z86.73       |
| Cerebral arteriosclerosis with history of previous cerebrovascular accident                            | 437.0, V12.54        | I67.2, Z86.73       |
| Systolic hypertension with cerebrovascular disease                                                     | 437.2                | I67.4               |
| Progressive intracranial arterial occlusion                                                            | 437.5                | I67.5               |
| Progressive intracranial arterial occlusion syndrome                                                   | 437.5                | I67.5               |
| Other specified cerebrovascular diseases                                                               |                      | I67.8               |
| Cerebrovascular insufficiency                                                                          | 437.9                | I67.81              |
| Acute cerebrovascular insufficiency                                                                    | 437.1                | I67.81              |
| Cerebrovascular insufficiency syndrome                                                                 | 437.9                | I67.81              |
| Cerebrovascular insufficiency, acute                                                                   | 437.1                | I67.81              |
| Cerebral artery insufficiency                                                                          | 437.1                | I67.81              |
| Insufficiency, arterial, cerebral                                                                      | 437.1                | I67.81              |
| Acute cerebrovascular insufficiency                                                                    |                      | I67.81              |
| Chronic cerebral ischemia                                                                              | 437.1                | I67.82              |
| Cerebral ischemia                                                                                      | 437.1                | I67.82              |
| Brain ischemia                                                                                         | 437.1                | I67.82              |
| Ischemic brain injury                                                                                  | 437.1                | I67.82              |
| Subcortical microvascular ischemic occlusive disease                                                   | 437.1                | I67.82              |
| Ischemic changes on computed tomography of head                                                        | 437.1                | I67.82              |
| Ischemic changes on head CT                                                                            | 437.1                | I67.82              |
| Cerebral ischemia                                                                                      |                      | I67.82              |
| Chronic hypoxic-ischemic brain injury                                                                  | 437.1, 348.1         | I67.82, G93.1       |
| Acute, but ill-defined, cerebrovascular disease                                                        | 436                  | I67.89              |

|                                                                                   |               |                |
|-----------------------------------------------------------------------------------|---------------|----------------|
| Other generalized ischemic cerebrovascular disease                                | 437.1         | I67.89         |
| Other ill-defined cerebrovascular disease                                         | 437.8         | I67.89         |
| Acute ill-defined cerebrovascular disease                                         | 436           | I67.89         |
| Generalized ischemic cerebrovascular disease                                      | 437.1         | I67.89         |
| Ischemic encephalopathy                                                           | 437.1         | I67.89         |
| Cerebrovascular disease, acute                                                    | 436           | I67.89         |
| Cerebrovascular disease, ill-defined, acute                                       | 436           | I67.89         |
| Other cerebrovascular disease                                                     | 437.8         | I67.89         |
| Other and ill-defined cerebrovascular disease                                     | 437.8         | I67.89         |
| Other cerebrovascular disease                                                     |               | I67.89         |
| Acute confusional state of cerebrovascular origin                                 | 437.1, 293.0  | I67.89, F05    |
| Flaccid hemiplegia of right dominant side due to other cerebrovascular disease    | 437.8, 342.01 | I67.89, G81.01 |
| Flaccid hemiplegia of left dominant side due to other cerebrovascular disease     | 437.8, 342.01 | I67.89, G81.02 |
| Flaccid hemiplegia of right nondominant side due to other cerebrovascular disease | 437.8, 342.02 | I67.89, G81.03 |
| Flaccid hemiplegia of left nondominant side due to other cerebrovascular disease  | 437.8, 342.02 | I67.89, G81.04 |
| Spastic hemiparesis of right dominant side due to other cerebrovascular disease   | 438.21        | I67.89, G81.11 |
| Spastic hemiplegia of right dominant side due to other cerebrovascular disease    | 437.8, 342.11 | I67.89, G81.11 |
| Spastic hemiparesis of left dominant side due to other cerebrovascular disease    | 438.21        | I67.89, G81.12 |
| Spastic hemiplegia of left dominant side due to other cerebrovascular disease     | 437.8, 342.11 | I67.89, G81.12 |
| Spastic hemiplegia of right nondominant side due to other cerebrovascular disease | 437.8, 342.12 | I67.89, G81.13 |
| Spastic hemiplegia of left nondominant side due to other cerebrovascular disease  | 437.8, 342.12 | I67.89, G81.14 |

|                                                                            |        |                |
|----------------------------------------------------------------------------|--------|----------------|
| Hemiparesis due to other cerebrovascular disease, unspecified laterality   | 438.2  | I67.89, G81.90 |
| Hemiparesis of right dominant side due to other cerebrovascular disease    | 438.21 | I67.89, G81.91 |
| Hemiparesis of left dominant side due to other cerebrovascular disease     | 438.21 | I67.89, G81.92 |
| Hemiparesis of right nondominant side due to other cerebrovascular disease | 438.22 | I67.89, G81.93 |
| Hemiparesis of left nondominant side due to other cerebrovascular disease  | 438.22 | I67.89, G81.94 |
| Cerebrovascular disease, unspecified                                       | 437.9  | I67.9          |
| Cerebrovascular lesion                                                     | 437.9  | I67.9          |
| Rolandic vein occlusion syndrome                                           | 437.8  | I67.9          |
| Merwarth's vein occlusion syndrome                                         | 437.8  | I67.9          |
| Artery disease, cerebral                                                   | 437.9  | I67.9          |
| Cerebral artery disease                                                    | 437.9  | I67.9          |
| Cerebral vascular disturbance                                              | 437.9  | I67.9          |
| Cerebrovascular disease                                                    | 437.9  | I67.9          |
| Cerebrovascular disorder                                                   | 437.9  | I67.9          |
| Cerebral vascular insufficiency                                            | 437.9  | I67.9          |
| Cerebrovascular disease or lesion                                          | 437.9  | I67.9          |
| Ill-defined cerebrovascular disease                                        | 437.8  | I67.9          |
| Cerebral vascular disorder                                                 | 437.9  | I67.9          |
| CVD (cerebrovascular disease)                                              | 437.9  | I67.9          |
| Brain vascular disorder                                                    | 437.9  | I67.9          |
| Cerebral arterial disease                                                  | 437.9  | I67.9          |
| Intracranial vascular disease                                              | 437.9  | I67.9          |
| Intracranial vascular disorder                                             | 437.9  | I67.9          |
| Cerebral microvascular disease                                             | 437.9  | I67.9          |
| Cerebral microvasculopathy                                                 | 437.9  | I67.9          |
| Cerebral vascular disease                                                  | 437.9  | I67.9          |
| Cortical paralysis of fixation syndrome                                    | 437.8  | I67.9          |
| Cerebrovascular small vessel disease                                       | 437.9  | I67.9          |
| Small vessel disease, cerebrovascular                                      | 437.9  | I67.9          |
| Intracranial vascular stenosis                                             | 437.9  | I67.9          |
| Diffuse cerebrovascular disease                                            | 437.9  | I67.9          |
| Disorder of intracranial venous sinus                                      | 437.9  | I67.9          |

|                                                                              |               |               |
|------------------------------------------------------------------------------|---------------|---------------|
| Cerebrovascular disease, unspecified                                         |               | I67.9         |
| Cerebrovascular disease in cancer patient                                    | 437.9, 199.1  | I67.9, C80.1  |
| Facial paresis due to cerebrovascular disease                                | 437.9, 351.0  | I67.9, G51.0  |
| Flaccid hemiplegia due to cerebrovascular disease                            | 437.9, 342.00 | I67.9, G81.00 |
| Flaccid hemiplegia of right dominant side due to cerebrovascular disease     | 437.9, 342.01 | I67.9, G81.01 |
| Flaccid hemiplegia of left dominant side due to cerebrovascular disease      | 437.9, 342.01 | I67.9, G81.02 |
| Flaccid hemiplegia of right nondominant side due to cerebrovascular disease  | 437.9, 342.02 | I67.9, G81.03 |
| Flaccid hemiplegia of left nondominant side due to cerebrovascular disease   | 437.9, 342.02 | I67.9, G81.04 |
| Spastic hemiplegia due to cerebrovascular disease                            | 437.9, 342.10 | I67.9, G81.10 |
| Spastic hemiparesis due to cerebrovascular disease                           | 438.2         | I67.9, G81.10 |
| Spastic hemiplegia of right dominant side due to cerebrovascular disease     | 437.9, 342.11 | I67.9, G81.11 |
| Spastic hemiparesis of right dominant side due to cerebrovascular disease    | 438.21        | I67.9, G81.11 |
| Spastic hemiplegia of left dominant side due to cerebrovascular disease      | 437.9, 342.11 | I67.9, G81.12 |
| Spastic hemiparesis of left dominant side due to cerebrovascular disease     | 438.21        | I67.9, G81.12 |
| Spastic hemiplegia of right nondominant side due to cerebrovascular disease  | 437.9, 342.12 | I67.9, G81.13 |
| Spastic hemiparesis of right nondominant side due to cerebrovascular disease | 438.22        | I67.9, G81.13 |
| Spastic hemiplegia of left nondominant side due to cerebrovascular disease   | 437.9, 342.12 | I67.9, G81.14 |
| Spastic hemiparesis of left nondominant side due to cerebrovascular disease  | 438.22        | I67.9, G81.14 |
| Hemiplegia due to cerebrovascular disease                                    | 437.9, 342.90 | I67.9, G81.90 |

|                                                                                                                |              |               |
|----------------------------------------------------------------------------------------------------------------|--------------|---------------|
| Hemiparesis due to cerebrovascular disease                                                                     | 438.2        | I67.9, G81.90 |
| Hemiparesis due to cerebrovascular disease, unspecified cerebrovascular disease type, unspecified laterality   | 438.2        | I67.9, G81.90 |
| Hemiparesis of right dominant side due to cerebrovascular disease                                              | 438.21       | I67.9, G81.91 |
| Hemiparesis of right dominant side due to cerebrovascular disease, unspecified cerebrovascular disease type    | 438.21       | I67.9, G81.91 |
| Hemiplegia of right dominant side due to cerebrovascular disease                                               | 438.21       | I67.9, G81.91 |
| Hemiparesis of left dominant side due to cerebrovascular disease                                               | 438.21       | I67.9, G81.92 |
| Hemiparesis of left dominant side due to cerebrovascular disease, unspecified cerebrovascular disease type     | 438.21       | I67.9, G81.92 |
| Hemiplegia of left dominant side due to cerebrovascular disease                                                | 438.21       | I67.9, G81.92 |
| Hemiparesis of right nondominant side due to cerebrovascular disease                                           | 438.22       | I67.9, G81.93 |
| Hemiparesis of right nondominant side due to cerebrovascular disease, unspecified cerebrovascular disease type | 438.22       | I67.9, G81.93 |
| Hemiplegia of right nondominant side due to cerebrovascular disease                                            | 438.22       | I67.9, G81.93 |
| Hemiparesis of left nondominant side due to cerebrovascular disease                                            | 438.22       | I67.9, G81.94 |
| Hemiparesis of left nondominant side due to cerebrovascular disease, unspecified cerebrovascular disease type  | 438.22       | I67.9, G81.94 |
| Hemiplegia of left nondominant side due to cerebrovascular disease                                             | 438.22       | I67.9, G81.94 |
| Disturbances of vision due to cerebrovascular disease                                                          | 437.9, 368.9 | I67.9, H53.9  |
| Ataxia due to cerebrovascular disease                                                                          | 437.9, 781.3 | I67.9, R27.0  |

|                                                                         |               |                |
|-------------------------------------------------------------------------|---------------|----------------|
| Incoordinated movements due to circulatory disease of brain             | 437.9, 781.3  | I67.9, R27.0   |
| Facial weakness due to cerebrovascular disease                          | 437.9, 781.94 | I67.9, R29.810 |
| Cerebrovascular disorders in diseases classified elsewhere              |               | I68            |
| Other cerebrovascular disorders in diseases classified elsewhere        | 437.8         | I68.8          |
| Other cerebrovascular disorders in diseases classified elsewhere        |               | I68.8          |
| Sequelae of cerebrovascular disease                                     |               | I69            |
| Sequelae of cerebral infarction                                         |               | I69.3          |
| Chronic unilateral cerebral infarction, watershed distribution          | 434.91        | I69.30         |
| Cerebral infarction, watershed distribution, unilateral, chronic        | 434.91        | I69.30         |
| Sequelae of cerebral infarction                                         | 438.9         | I69.30         |
| Chronic bilateral cerebral infarction in watershed distribution         | V12.54        | I69.30         |
| Arterial ischemic stroke, ICA (internal carotid artery), left, chronic  | V12.54        | I69.30         |
| Chronic left arterial ischemic stroke, ICA (internal carotid artery)    | V12.54        | I69.30         |
| Chronic ischemic left ICA stroke                                        | V12.54        | I69.30         |
| Chronic right arterial ischemic stroke, ICA (internal carotid artery)   | V12.54        | I69.30         |
| Arterial ischemic stroke, ICA (internal carotid artery), right, chronic | V12.54        | I69.30         |
| Chronic ischemic right ica stroke                                       | V12.54        | I69.30         |
| Cerebral infarction, watershed distribution, bilateral, chronic         | V12.54        | I69.30         |
| Arterial ischemic stroke, MCA (middle cerebral artery), left, chronic   | V12.54        | I69.30         |
| Chronic left arterial ischemic stroke, MCA (middle cerebral artery)     | V12.54        | I69.30         |
| Chronic ischemic left MCA stroke                                        | V12.54        | I69.30         |

|                                                                        |        |        |
|------------------------------------------------------------------------|--------|--------|
| Arterial ischemic stroke, MCA (middle cerebral artery), right, chronic | V12.54 | I69.30 |
| Chronic right arterial ischemic stroke, MCA (middle cerebral artery)   | V12.54 | I69.30 |
| Chronic ischemic right MCA stroke                                      | V12.54 | I69.30 |
| Chronic left arterial ischemic stroke, ACA (anterior cerebral artery)  | V12.54 | I69.30 |
| Chronic ischemic left ACA stroke                                       | V12.54 | I69.30 |
| Chronic right arterial ischemic stroke, ACA (anterior cerebral artery) | 438.9  | I69.30 |
| Arterial ischemic stroke, ACA (anterior cerebral artery), right, chron | 438.9  | I69.30 |
| Chronic ischemic right ACA stroke                                      | 438.9  | I69.30 |
| Chronic left arterial ischemic stroke, PCA (posterior cerebral artery) | V12.54 | I69.30 |
| Arterial ischemic stroke, PCA (posterior cerebral artery), left, chron | V12.54 | I69.30 |
| Chronic ischemic left PCA stroke                                       | V12.54 | I69.30 |
| Arterial ischemic stroke, PCA (posterior cerebral artery), right, chro | V12.54 | I69.30 |
| Chronic ischemic right PCA stroke                                      | V12.54 | I69.30 |
| Arterial ischemic stroke, vertebrobasilar, brainstem, chronic          | V12.54 | I69.30 |
| Chronic arterial ischemic stroke, vertebrobasilar, brainstem           | V12.54 | I69.30 |
| Chronic ischemic vertebrobasilar artery brainstem stroke               | V12.54 | I69.30 |
| Arterial ischemic stroke, vertebrobasilar, thalamic, chronic           | V12.54 | I69.30 |
| Chronic ischemic vertebrobasilar artery thalamic stroke                | V12.54 | I69.30 |
| Arterial ischemic stroke, multifocal, anterior circulation, chronic    | V12.54 | I69.30 |
| Chronic arterial ischemic stroke, multifocal, anterior circulation     | V12.54 | I69.30 |
| Chronic ischemic multifocal anterior circulation stroke                | V12.54 | I69.30 |



|                                                                        |        |        |
|------------------------------------------------------------------------|--------|--------|
| Arterial ischemic stroke, multifocal, mult vascular territories, chron | V12.54 | I69.30 |
| Chronic ischemic multifocal multiple vascular territories stroke       | V12.54 | I69.30 |
| Arterial ischemic stroke, multifocal, posterior circulation, chronic   | V12.54 | I69.30 |
| Chronic arterial ischemic stroke, multifocal, posterior circulation    | V12.54 | I69.30 |
| Chronic ischemic multifocal posterior circulation stroke               | V12.54 | I69.30 |
| Personal history of stroke with residual effects                       | 438.9  | I69.30 |
| History of stroke with residual effects                                | 438.9  | I69.30 |
| H/O: stroke with residual effects                                      | 438.9  | I69.30 |
| Arterial ischemic stroke, chronic                                      | V12.54 | I69.30 |
| Chronic arterial ischemic stroke                                       | V12.54 | I69.30 |
| Sequelae, post-stroke                                                  | 438.9  | I69.30 |
| Late effect of stroke                                                  | 438.9  | I69.30 |
| Sequela, post-stroke                                                   | 438.9  | I69.30 |
| Complications of stroke                                                | 438.9  | I69.30 |
| Chronic ischemic left anterior cerebral artery stroke                  | V12.54 | I69.30 |
| Chronic ischemic left internal carotid artery stroke                   | V12.54 | I69.30 |
| Chronic ischemic left middle cerebral artery stroke                    | V12.54 | I69.30 |
| Chronic ischemia posterior cerebral artery stroke                      | 438.9  | I69.30 |
| Chronic ischemic right anterior cerebral artery stroke                 | 438.9  | I69.30 |
| Chronic ischemic right internal carotid artery stroke                  | V12.54 | I69.30 |
| Chronic ischemic right middle cerebral artery stroke                   | V12.54 | I69.30 |
| Chronic ischemic right posterior cerebral artery stroke                | V12.54 | I69.30 |

|                                                                              |        |        |
|------------------------------------------------------------------------------|--------|--------|
| Chronic ischemic left anterior cerebral artery (ACA) stroke                  | V12.54 | I69.30 |
| Chronic ischemic left internal carotid artery (ICA) stroke                   | V12.54 | I69.30 |
| Chronic ischemic left middle cerebral artery (MCA) stroke                    | V12.54 | I69.30 |
| Chronic ischemic right anterior cerebral artery (ACA) stroke                 | 438.9  | I69.30 |
| Chronic ischemic right internal carotid artery (ICA) stroke                  | V12.54 | I69.30 |
| Chronic ischemic right middle cerebral artery (MCA) stroke                   | V12.54 | I69.30 |
| Chronic ischemic right posterior cerebral artery (PCA) stroke                | V12.54 | I69.30 |
| Chronic ischemic left posterior cerebral artery (PCA) stroke                 | V12.54 | I69.30 |
| Chronic ischemic left posterior cerebral artery stroke                       | V12.54 | I69.30 |
| Arterial ischemic stroke, ICA (internal carotid artery), right, chronic      | V12.54 | I69.30 |
| Arterial ischemic stroke, ACA (anterior cerebral artery), left, chronic      | V12.54 | I69.30 |
| Arterial ischemic stroke, ACA (anterior cerebral artery), right, chronic     | 438.9  | I69.30 |
| Arterial ischemic stroke, PCA (posterior cerebral artery), left, chronic     | V12.54 | I69.30 |
| Arterial ischemic stroke, PCA (posterior cerebral artery), right, chronic    | V12.54 | I69.30 |
| Chronic right arterial ischemic stroke, PCA (posterior cerebral artery)      | V12.54 | I69.30 |
| Arterial ischemic stroke, multifocal, multiple vascular territories, chronic | V12.54 | I69.30 |
| Chronic arterial ischemic stroke, multifocal, multiple vascular territories  | V12.54 | I69.30 |
| Multi-infarct state                                                          | 438.9  | I69.30 |
| Chronic cerebrovascular accident                                             | 434.91 | I69.30 |
| Late effect of lacunar infarction                                            | 438.9  | I69.30 |

|                                                                          |               |         |
|--------------------------------------------------------------------------|---------------|---------|
| Sequela of cerebrovascular accident                                      | 438.9         | I69.30  |
| History of cerebrovascular accident with residual deficit                | 438.9         | I69.30  |
| History of CVA with residual deficit                                     | 438.9         | I69.30  |
| History of stroke with current residual effects                          | 438.9         | I69.30  |
| Personal history of stroke with current residual effects                 | 438.9         | I69.30  |
| Late effect of cerebrovascular accident                                  | 438.9         | I69.30  |
| History of ischemic cerebrovascular accident with residual deficit       | 438.9         | I69.30  |
| History of stroke with residual deficit                                  | 438.9         | I69.30  |
| Chronic cerebrovascular accident (CVA)                                   | 434.91        | I69.30  |
| History of cerebrovascular accident (CVA) with residual deficit          | 438.9         | I69.30  |
| History of ischemic cerebrovascular accident (CVA) with residual deficit | 438.9         | I69.30  |
| Late effect of cerebrovascular accident (CVA)                            | 438.9         | I69.30  |
| Cerebral multi-infarct state                                             | 438.9         | I69.30  |
| Unspecified sequelae of cerebral infarction                              | 438.9         | I69.30  |
| Multi infarct state                                                      | 438.9         | I69.30  |
| Late effects of cerebral ischemic stroke                                 | 438.9         | I69.30  |
| Late effect of ischemic cerebral stroke                                  | 438.9         | I69.30  |
| Unspecified sequelae of cerebral infarction                              |               | I69.30  |
| Cognitive deficits following cerebral infarction                         |               | I69.31  |
| Attention and concentration deficit following cerebral infarction        | 438           | I69.310 |
| Attention and concentration deficit following cerebral infarction        |               | I69.310 |
| Memory deficit after cerebral infarction                                 | 438.0, 780.93 | I69.311 |
| Memory deficit following cerebral infarction                             | 438.0, 780.93 | I69.311 |

|                                                                                      |                      |         |
|--------------------------------------------------------------------------------------|----------------------|---------|
| Memory deficit following cerebral infarction                                         |                      | 169.311 |
| Visuospatial deficit and spatial neglect after cerebral infarction                   | 438.7, 799.53, 781.8 | 169.312 |
| Visuospatial deficit and spatial neglect following cerebral infarction               | 438.7, 799.53, 781.8 | 169.312 |
| Visuospatial deficit and spatial neglect following cerebral infarction               |                      | 169.312 |
| Psychomotor deficit after cerebral infarction                                        | 438.89, 799.54       | 169.313 |
| Psychomotor deficit following cerebral infarction                                    | 438.89, 799.54       | 169.313 |
| Psychomotor deficit following cerebral infarction                                    |                      | 169.313 |
| Frontal lobe and executive function deficit following cerebral infarction            | 438                  | 169.314 |
| Frontal lobe and executive function deficit following cerebral infarction            |                      | 169.314 |
| Cognitive social or emotional deficit following cerebral infarction                  | 438                  | 169.315 |
| Cognitive social or emotional deficit following cerebral infarction                  |                      | 169.315 |
| Other symptoms and signs involving cognitive functions following cerebral infarction | 799.59               | 169.318 |
| Other symptoms and signs involving cognitive functions following cerebral infarction |                      | 169.318 |
| Residual cognitive deficit as late effect of cerebrovascular accident                | 438                  | 169.319 |
| Residual cognitive deficit as late effect of stroke                                  | 438                  | 169.319 |
| Cognitive deficit status post cerebrovascular accident                               | 438                  | 169.319 |
| Cognitive deficit S/P CVA (cerebrovascular accident)                                 | 438                  | 169.319 |
| CVA, old, cognitive deficits                                                         | 438                  | 169.319 |

|                                                                                            |        |         |
|--------------------------------------------------------------------------------------------|--------|---------|
| Cognitive deficit due to old cerebral infarction                                           | 438    | 169.319 |
| Cognitive deficit due to old lacunar stroke                                                | 438    | 169.319 |
| Cognitive deficit, post-stroke                                                             | 438    | 169.319 |
| Cognitive deficits following cerebral infarction                                           | 438    | 169.319 |
| Cognitive deficit due to recent cerebral infarction                                        | 438    | 169.319 |
| Cognitive deficit due to recent cerebrovascular accident                                   | 438    | 169.319 |
| Cognitive deficit due to recent stroke                                                     | 438    | 169.319 |
| Multiple old cerebral infarcts with cognitive deficit                                      | 438    | 169.319 |
| Cognitive deficit due to recent cerebrovascular accident (CVA)                             | 438    | 169.319 |
| Cognitive deficit following cerebrovascular accident (CVA)                                 | 438    | 169.319 |
| Cognitive deficit due to old cerebrovascular accident (CVA)                                | 438    | 169.319 |
| Cognitive deficit due to old subcortical infarcts                                          | 438    | 169.319 |
| Unspecified symptoms and signs involving cognitive functions following cerebral infarction | 438    | 169.319 |
| Unspecified symptoms and signs involving cognitive functions following cerebral infarction |        | 169.319 |
| Speech and language deficits following cerebral infarction                                 |        | 169.32  |
| Aphasia S/P CVA                                                                            | 438.11 | 169.320 |
| Aphasia, post-stroke                                                                       | 438.11 | 169.320 |
| Aphasia, late effect of prenatal or perinatal stroke                                       | 438.11 | 169.320 |
| CVA, old, aphasia                                                                          | 438.11 | 169.320 |
| Aphasia due to old cerebral infarction                                                     | 438.11 | 169.320 |
| Aphasia following cerebral infarction                                                      | 438.11 | 169.320 |

|                                                            |        |         |
|------------------------------------------------------------|--------|---------|
| Aphasia as late effect of cerebrovascular accident         | 438.11 | 169.320 |
| Aphasia as late effect of stroke                           | 438.11 | 169.320 |
| Aphasia due to recent cerebrovascular accident             | 438.11 | 169.320 |
| Aphasia due to recent cerebral infarction                  | 438.11 | 169.320 |
| Aphasia due to recent stroke                               | 438.11 | 169.320 |
| Aphasia due to old brainstem infarction                    | 438.11 | 169.320 |
| Aphasia due to recent cerebrovascular accident (CVA)       | 438.11 | 169.320 |
| Aphasia as late effect of cerebrovascular accident (CVA)   | 438.11 | 169.320 |
| Aphasia following cerebral infarction                      |        | 169.320 |
| Dysphasia status post cerebrovascular accident             | 438.12 | 169.321 |
| Dysphasia S/P CVA (cerebrovascular accident)               | 438.12 | 169.321 |
| Dysphasia due to old cerebrovascular accident              | 438.12 | 169.321 |
| Dysphasia due to old stroke                                | 438.12 | 169.321 |
| Dysphasia, post-stroke                                     | 438.12 | 169.321 |
| Dysphasia following cerebral infarction                    | 438.12 | 169.321 |
| Dysphasia due to recent cerebrovascular accident           | 438.12 | 169.321 |
| Dysphasia due to recent stroke                             | 438.12 | 169.321 |
| Dysphasia due to recent cerebrovascular accident (CVA)     | 438.12 | 169.321 |
| Dysphasia following cerebrovascular accident (CVA)         | 438.12 | 169.321 |
| Dysphasia as late effect of cerebrovascular accident (CVA) | 438.12 | 169.321 |
| Dysphasia following cerebral infarction                    |        | 169.321 |
| CVA, old, dysarthria                                       | 438.13 | 169.322 |
| Dysarthria following cerebrovascular accident              | 438.13 | 169.322 |
| Dysarthria due to old brainstem infarction                 | 438.13 | 169.322 |
| Dysarthria due to old lacunar stroke                       | 438.13 | 169.322 |

|                                                                              |        |         |
|------------------------------------------------------------------------------|--------|---------|
| Dysarthria, post-stroke                                                      | 438.13 | 169.322 |
| Dysarthria following cerebral infarction                                     | 438.13 | 169.322 |
| Dysarthria as late effect of stroke                                          | 438.13 | 169.322 |
| Dysarthria due to recent cerebral infarction                                 | 438.13 | 169.322 |
| Dysarthria due to recent stroke                                              | 438.13 | 169.322 |
| Dysarthria due to recent cerebrovascular accident                            | 438.13 | 169.322 |
| Multiple old cerebral infarcts with dysarthria                               | 438.13 | 169.322 |
| Dysarthria due to recent cerebrovascular accident (CVA)                      | 438.13 | 169.322 |
| Dysarthria as late effect of cerebrovascular accident (CVA)                  | 438.13 | 169.322 |
| Dysarthria following cerebral infarction                                     |        | 169.322 |
| Fluency disorder, post-stroke                                                | 438.14 | 169.323 |
| Fluency disorder following cerebral infarction                               | 438.14 | 169.323 |
| Fluency disorder as late effect of stroke                                    | 438.14 | 169.323 |
| Fluency disorder following cerebral infarction                               |        | 169.323 |
| CVA, old, speech/language deficit                                            | 438.1  | 169.328 |
| Speech or language deficit following cerebrovascular accident                | 438.1  | 169.328 |
| Speech and language deficit due to old cerebral infarction                   | 438.1  | 169.328 |
| Speech and language deficit due to old cerebrovascular accident              | 438.1  | 169.328 |
| Speech and language deficit due to old stroke                                | 438.1  | 169.328 |
| Speech or language deficit, post-stroke                                      | 438.1  | 169.328 |
| Speech and language deficit as late effect of stroke                         | 438.1  | 169.328 |
| Speech and language deficit as late effect of cerebrovascular accident (CVA) | 438.1  | 169.328 |
| Other speech and language deficits following cerebral infarction             | 438.19 | 169.328 |

|                                                                                               |        |         |
|-----------------------------------------------------------------------------------------------|--------|---------|
| Other speech and language deficits following cerebral infarction                              |        | 169.328 |
| Monoplegia of upper limb following cerebral infarction                                        |        | 169.33  |
| Monoplegia of arm after cerebral infarct affecting right dominant side                        | 438.31 | 169.331 |
| Monoplegia of upper extremity following cerebral infarction affecting right dominant side     | 438.31 | 169.331 |
| Monoplegia of upper limb following cerebral infarction affecting right dominant side          | 438.31 | 169.331 |
| Monoplg upr lmb fol cerebral infrc aff right dominant side                                    | 438.31 | 169.331 |
| Monoplegia of upper limb following cerebral infarction affecting right dominant side          |        | 169.331 |
| Monoplegia of arm after cerebral infarct affecting left dominant side                         | 438.31 | 169.332 |
| Monoplegia of upper extremity following cerebral infarction affecting left dominant side      | 438.31 | 169.332 |
| Monoplegia of upper limb following cerebral infarction affecting left dominant side           | 438.31 | 169.332 |
| Monoplg upr lmb fol cerebral infrc aff left dominant side                                     | 438.31 | 169.332 |
| Monoplegia of upper limb following cerebral infarction affecting left dominant side           |        | 169.332 |
| Monoplegia arm after cerebral infarct affect right non-dominant side                          | 438.32 | 169.333 |
| Monoplegia of upper extremity following cerebral infarction affecting right non-dominant side | 438.32 | 169.333 |



|                                                                                              |        |         |
|----------------------------------------------------------------------------------------------|--------|---------|
| Monoplegia of upper limb following cerebral infarction affecting right non-dominant side     | 438.32 | 169.333 |
| Monoplg upr lmb fol cerebral infrc aff right nondom side                                     | 438.32 | 169.333 |
| Monoplegia of upper limb following cerebral infarction affecting right non-dominant side     |        | 169.333 |
| Monoplegia of arm after cerebral infarct affect left non-dominant side                       | 438.32 | 169.334 |
| Monoplegia of upper extremity following cerebral infarction affecting left non-dominant side | 438.32 | 169.334 |
| Monoplegia of upper limb following cerebral infarction affecting left non-dominant side      | 438.32 | 169.334 |
| Monoplg upr lmb fol cerebral infrc aff left nondom side                                      | 438.32 | 169.334 |
| Monoplegia of upper limb following cerebral infarction affecting left non-dominant side      |        | 169.334 |
| Monoplegia, upper limb, nondominant side S/P CVA (cerebrovascular acc)                       | 438.32 | 169.339 |
| Monoplegia, upper limb, dominant side S/P CVA (cerebrovascular acc)                          | 438.31 | 169.339 |
| Monoplegia, upper limb, dominant side S/P CVA                                                | 438.31 | 169.339 |
| Monoplegia of upper limb due to old cerebral infarction                                      | 438.3  | 169.339 |
| Monoplegia of upper extremity following cerebral infarction                                  | 438.3  | 169.339 |
| Upper limb monoplegia of nondominant side status post cerebrovascular accident               | 438.32 | 169.339 |
| Monoplegia, upper limb, nondominant side S/P CVA (cerebrovascular accident)                  | 438.32 | 169.339 |
| Upper limb monoplegia of dominant side following cerebrovascular accident                    | 438.31 | 169.339 |

|                                                                                             |        |         |
|---------------------------------------------------------------------------------------------|--------|---------|
| Upper limb monoplegia of dominant side following CVA (cerebrovascular accident)             | 438.31 | 169.339 |
| Monoplegia of upper extremity due to recent cerebral infarction                             | 438.3  | 169.339 |
| Monoplegia of upper limb due to recent cerebrovascular accident                             | 438.3  | 169.339 |
| Monoplegia of upper extremity of non-dominant side following cerebrovascular accident       | 438.32 | 169.339 |
| Monoplegia of upper extremity due to old cerebral infarction                                | 438.3  | 169.339 |
| Monoplegia of upper extremity due to recent cerebrovascular accident                        | 438.3  | 169.339 |
| Monoplegia of upper extremity of dominant side following cerebrovascular accident           | 438.31 | 169.339 |
| Monoplegia of upper extremity due to recent cerebrovascular accident (CVA)                  | 438.3  | 169.339 |
| Monoplegia of upper extremity of dominant side following cerebrovascular accident (CVA)     | 438.31 | 169.339 |
| Monoplegia of upper extremity of non-dominant side following cerebrovascular accident (CVA) | 438.32 | 169.339 |
| Monoplegia of upper limb following cerebral infarction affecting unspecified side           | 438.3  | 169.339 |
| Monoplg upr lmb following cerebral infrc affecting unsp side                                | 438.3  | 169.339 |
| Monoplegia of upper extremity following cerebral infarction, unspecified laterality         | 438.3  | 169.339 |
| Monoplegia of upper limb following cerebral infarction affecting unspecified side           |        | 169.339 |
| Monoplegia of lower limb following cerebral infarction                                      |        | 169.34  |

|                                                                                               |        |         |
|-----------------------------------------------------------------------------------------------|--------|---------|
| Monoplegia of leg after cerebral infarct affecting right dominant side                        | 438.41 | I69.341 |
| Monoplegia of lower extremity following cerebral infarction affecting right dominant side     | 438.41 | I69.341 |
| Monoplegia of lower limb following cerebral infarction affecting right dominant side          | 438.41 | I69.341 |
| Monoplg low lmb fol cerebral infrc aff right dominant side                                    | 438.41 | I69.341 |
| Monoplegia of lower limb following cerebral infarction affecting right dominant side          |        | I69.341 |
| Monoplegia of leg after cerebral infarct affecting left dominant side                         | 438.41 | I69.342 |
| Monoplegia of lower extremity following cerebral infarction affecting left dominant side      | 438.41 | I69.342 |
| Monoplegia of lower limb following cerebral infarction affecting left dominant side           | 438.41 | I69.342 |
| Monoplg low lmb fol cerebral infrc aff left dominant side                                     | 438.41 | I69.342 |
| Monoplegia of lower limb following cerebral infarction affecting left dominant side           |        | I69.342 |
| Monoplegia leg after cerebral infarct affect right non-dominant side                          | 438.42 | I69.343 |
| Monoplegia of lower extremity following cerebral infarction affecting right non-dominant side | 438.42 | I69.343 |
| Monoplegia of lower limb following cerebral infarction affecting right non-dominant side      | 438.42 | I69.343 |
| Monoplg low lmb fol cerebral infrc aff right nondom side                                      | 438.42 | I69.343 |

|                                                                                              |         |         |
|----------------------------------------------------------------------------------------------|---------|---------|
| Monoplegia of lower limb following cerebral infarction affecting right non-dominant side     |         | 169.343 |
| Monoplegia of leg after cerebral infarct affect left non-dominant side                       | 438.42  | 169.344 |
| Monoplegia of lower extremity following cerebral infarction affecting left non-dominant side | 438.42  | 169.344 |
| Monoplegia of lower limb following cerebral infarction affecting left non-dominant side      | 438.42  | 169.344 |
| Monoplg low lmb fol cerebral infrc aff left nondom side                                      | 438.42  | 169.344 |
| Monoplegia of lower limb following cerebral infarction affecting left non-dominant side      |         | 169.344 |
| Monoplegia, lower extremity, post-stroke                                                     | IMO0002 | 169.349 |
| Monoplegia, lower limb S/P CVA (cerebrovascular accident)                                    | IMO0002 | 169.349 |
| Monoplegia of lower limb following cerebrovascular accident                                  | IMO0002 | 169.349 |
| Monoplegia of lower limb following CVA (cerebrovascular accident)                            | IMO0002 | 169.349 |
| Monoplegia, lower limb, dominant side S/P CVA (cerebrovascular acc)                          | 438.41  | 169.349 |
| Monoplegia, lower limb, nondominant side S/P CVA (cerebrovascular acc)                       | 438.42  | 169.349 |
| Monoplegia, dominant lower extremity, post-stroke                                            | 438.41  | 169.349 |
| Monoplegia of lower extremity following cerebral infarction                                  | 438.4   | 169.349 |
| Monoplegia of lower limb due to recent cerebrovascular accident                              | 438.4   | 169.349 |
| Monoplegia of lower limb dominant side status post cerebrovascular accident                  | 438.41  | 169.349 |
| Monoplegia, lower limb, dominant side S/P CVA (cerebrovascular accident)                     | 438.41  | 169.349 |

|                                                                                                    |         |         |
|----------------------------------------------------------------------------------------------------|---------|---------|
| Monoplegia of lower limb nondominant side status post cerebrovascular accident                     | 438.42  | 169.349 |
| Monoplegia, lower limb, nondominant side S/P CVA (cerebrovascular accident)                        | 438.42  | 169.349 |
| Monoplegia of lower extremity affecting non-dominant side following cerebrovascular accident       | 438.42  | 169.349 |
| Monoplegia of lower extremity due to recent cerebrovascular accident                               | 438.4   | 169.349 |
| Monoplegia of lower extremity following cerebrovascular accident                                   | IMO0002 | 169.349 |
| Monoplegia of lower extremity affecting dominant side following cerebrovascular accident           | 438.41  | 169.349 |
| Monoplegia of lower extremity due to recent cerebrovascular accident (CVA)                         | 438.4   | 169.349 |
| Monoplegia of lower extremity following cerebrovascular accident (CVA)                             | IMO0002 | 169.349 |
| Monoplegia of lower extremity affecting dominant side following cerebrovascular accident (CVA)     | 438.41  | 169.349 |
| Monoplegia of lower extremity affecting non-dominant side following cerebrovascular accident (CVA) | 438.42  | 169.349 |
| Monoplegia of lower limb following cerebral infarction affecting unspecified side                  | 438.4   | 169.349 |
| Monoplegia of lower extremity affecting dominant side following cerebrovascular accident (CVA)     | 438.41  | 169.349 |
| Monoplegia of lower extremity affecting dominant side following cerebrovascular accident           | 438.41  | 169.349 |
| Monoplegia of lower limb following cerebral infarction affecting unspecified side                  | 438.4   | 169.349 |
| Monoplegia of lower extremity following cerebral infarction, unspecified laterality                | 438.4   | 169.349 |

|                                                                                           |                |         |
|-------------------------------------------------------------------------------------------|----------------|---------|
| Monoplegia of lower limb following cerebral infarction affecting unspecified side         |                | 169.349 |
| Hemiplegia and hemiparesis following cerebral infarction                                  |                | 169.35  |
| Hemiparesis affecting right side as late effect of stroke                                 | 438.2          | 169.351 |
| Hemiparesis affecting right side as late effect of cerebrovascular accident               | 438.2          | 169.351 |
| Hemiplegia following cerebral infarction affecting right dominant side                    | 438.21         | 169.351 |
| Hemiparesis affecting right side as late effect of cerebrovascular accident (CVA)         | 438.2          | 169.351 |
| Hemiplegia and hemiparesis following cerebral infarction affecting right dominant side    | 438.21         | 169.351 |
| Hemiplegia of right dominant side due to infarction of brain, unspecified hemiplegia type | 438.21, 429.79 | 169.351 |
| Hemiplegia and hemiparesis following cerebral infarction affecting right dominant side    |                | 169.351 |
| Hemiplegia following cerebral infarction affecting left dominant side                     | 438.21         | 169.352 |
| Hemiplegia and hemiparesis following cerebral infarction affecting left dominant side     | 438.21         | 169.352 |
| Hemiplegia of left dominant side due to infarction of brain, unspecified hemiplegia type  | 438.21         | 169.352 |
| Hemiplegia and hemiparesis following cerebral infarction affecting left dominant side     |                | 169.352 |
| Hemiplegia following cerebral infarction affecting nondominant side                       | 438.22         | 169.353 |

|                                                                                              |                |         |
|----------------------------------------------------------------------------------------------|----------------|---------|
| Hemiplegia and hemiparesis following cerebral infarction affecting right non-dominant side   | 438.22         | 169.353 |
| Hemiplegia of right nondominant side due to infarction of brain, unspecified hemiplegia type | 438.22, 429.79 | 169.353 |
| Hemiplegia and hemiparesis following cerebral infarction affecting right non-dominant side   |                | 169.353 |
| Hemiparesis affecting left side as late effect of stroke                                     | 438.2          | 169.354 |
| Hemiparesis affecting left side as late effect of cerebrovascular accident                   | 438.2          | 169.354 |
| Hemiplegia following cerebral infarction affecting left nondominant side                     | 438.22         | 169.354 |
| Hemiparesis affecting left side as late effect of cerebrovascular accident (CVA)             | 438.2          | 169.354 |
| Hemiplegia and hemiparesis following cerebral infarction affecting left non-dominant side    | 438.22         | 169.354 |
| Hemiplegia and hemiparesis following cerebral infarction affecting left non-dominant side    |                | 169.354 |
| Hemiplegia, dominant side S/P CVA (cerebrovascular accident)                                 | 438.21         | 169.359 |
| Hemiplegia S/P CVA (cerebrovascular accident)                                                | 438.2          | 169.359 |
| Hemiplegia of dominant side following cerebrovascular accident                               | 438.21         | 169.359 |
| Hemiplegia of dominant side following CVA (cerebrovascular accident)                         | 438.21         | 169.359 |
| Hemiplegia following cerebrovascular accident                                                | 438.2          | 169.359 |
| Hemiplegia following CVA (cerebrovascular accident)                                          | 438.2          | 169.359 |
| CVA, old, hemiparesis                                                                        | 438.2          | 169.359 |

|                                                                                   |        |         |
|-----------------------------------------------------------------------------------|--------|---------|
| Hemiparesis following cerebrovascular accident                                    | 438.2  | 169.359 |
| Hemiplegia due to old stroke                                                      | 438.2  | 169.359 |
| Hemiparesis due to old cerebral infarction                                        | 438.2  | 169.359 |
| Hemiparesis due to old cerebrovascular accident                                   | 438.2  | 169.359 |
| Hemiparesis due to old stroke                                                     | 438.2  | 169.359 |
| Hemiparesis due to old lacunar stroke                                             | 438.2  | 169.359 |
| Hemiplegia, post-stroke                                                           | 438.2  | 169.359 |
| Hemiplegia affecting dominant side, post-stroke                                   | 438.21 | 169.359 |
| Hemiplegia as late effect of cerebrovascular accident                             | 438.2  | 169.359 |
| Hemiplegia as late effect of stroke                                               | 438.2  | 169.359 |
| Dominant hemiplegia complicating stroke                                           | 438.21 | 169.359 |
| Hemiparesis due to recent cerebrovascular accident                                | 438.2  | 169.359 |
| Hemiparesis due to recent stroke                                                  | 438.2  | 169.359 |
| Hemiparesis of dominant side due to recent cerebrovascular accident               | 438.21 | 169.359 |
| Hemiparesis affecting nondominant side as late effect of stroke                   | 438.22 | 169.359 |
| Hemiparesis affecting dominant side as late effect of stroke                      | 438.21 | 169.359 |
| Hemiparesis affecting dominant side as late effect of cerebrovascular accident    | 438.21 | 169.359 |
| Hemiparesis affecting nondominant side as late effect of cerebrovascular accident | 438.22 | 169.359 |
| Hemiparesis due to recent cerebral infarction                                     | 438.2  | 169.359 |
| Multiple old cerebral infarcts with hemiparesis                                   | 438.2  | 169.359 |
| Hemiplegia due to recent cerebrovascular accident                                 | 438.2  | 169.359 |
| Hemiplegia due to recent stroke                                                   | 438.2  | 169.359 |



|                                                                                         |                |                  |
|-----------------------------------------------------------------------------------------|----------------|------------------|
| Hemiparesis due to old brainstem infarction                                             | 438.2          | 169.359          |
| Hemiplegia due to old brainstem infarction                                              | 438.2          | 169.359          |
| Hemiparesis due to recent cerebrovascular accident (CVA)                                | 438.2          | 169.359          |
| Hemiplegia due to recent cerebrovascular accident (CVA)                                 | 438.2          | 169.359          |
| Hemiparesis of dominant side due to recent cerebrovascular accident (CVA)               | 438.21         | 169.359          |
| Hemiparesis following cerebrovascular accident (CVA)                                    | 438.2          | 169.359          |
| Hemiplegia following cerebrovascular accident (CVA)                                     | 438.2          | 169.359          |
| Hemiplegia of dominant side following cerebrovascular accident (CVA)                    | 438.21         | 169.359          |
| Hemiplegia as late effect of cerebrovascular accident (CVA)                             | 438.2          | 169.359          |
| Hemiparesis as late effect of cerebrovascular accident (CVA)                            | 438.2          | 169.359          |
| Hemiparesis affecting dominant side as late effect of cerebrovascular accident (CVA)    | 438.21         | 169.359          |
| Hemiparesis affecting nondominant side as late effect of cerebrovascular accident (CVA) | 438.22         | 169.359          |
| Hemiplegia and hemiparesis following cerebral infarction affecting unspecified side     | 438.2          | 169.359          |
| Hemiplegia following cerebral infarction affecting unsp side                            | 438.2          | 169.359          |
| Hemiplegia and hemiparesis following cerebral infarction affecting unspecified side     |                | 169.359          |
| Hemiparesis and aphasia as late effects of cerebrovascular accident                     | 438.20, 438.11 | 169.359, 169.320 |

|                                                                                                     |                       |                           |
|-----------------------------------------------------------------------------------------------------|-----------------------|---------------------------|
| Hemiparesis and aphasia as late effect of cerebrovascular accident (CVA)                            | 438.20, 438.11        | I69.359, I69.320          |
| Hemiparesis and dysphasia as late effects of cerebrovascular accident                               | 438.20, 438.12        | I69.359, I69.321          |
| Hemiparesis and dysphasia as late effect of cerebrovascular accident (CVA)                          | 438.20, 438.12        | I69.359, I69.321          |
| Hemiparesis and speech and language deficit as late effects of stroke                               | 438.20, 438.10        | I69.359, I69.328          |
| Hemiparesis and speech and language deficit as late effects of cerebrovascular accident             | 438.20, 438.10        | I69.359, I69.328          |
| Hemiparesis and speech and language deficit as late effect of cerebrovascular accident (CVA)        | 438.20, 438.10        | I69.359, I69.328          |
| Hemiparesis, speech and language deficits, and cognitive deficits due to recent cerebral infarction | 438.0, 438.10, 438.20 | I69.359, I69.328, I69.319 |
| Speech, language, and cognitive deficits, with hemiparesis, due to recent cerebral infarction       | 438.0, 438.20, 438.10 | I69.359, I69.328, I69.319 |
| Hemipar w/speech, lang, & cogntv deficits from recent cerebral infarct                              | 438.0, 438.20, 438.10 | I69.359, I69.328, I69.319 |
| Hemiparesis and other late effects of cerebrovascular accident                                      | 438.20, 438.89        | I69.359, I69.398          |
| Hemiparesis and alteration of sensations as late effects of stroke                                  | 438.20, 438.6         | I69.359, I69.398          |
| Hemiparesis and alteration of sensations as late effects of cerebrovascular accident                | 438.20, 438.6         | I69.359, I69.398          |
| Hemiparesis and alteration of sensations as late effect of cerebrovascular accident (CVA)           | 438.20, 438.6         | I69.359, I69.398          |
| Other paralytic syndrome following cerebral infarction                                              |                       | I69.36                    |
| Oth parlyt syndrome fol cereb infrc aff right dominant side                                         | 438.51                | I69.361                   |

|                                                                                          |        |         |
|------------------------------------------------------------------------------------------|--------|---------|
| Other paralytic syndrome following cerebral infarction affecting right dominant side     | 438.51 | I69.361 |
| Other paralytic syndrome following cerebral infarction affecting right dominant side     |        | I69.361 |
| Oth parlyt syndrome fol cereb infrc aff left dominant side                               | 438.51 | I69.362 |
| Other paralytic syndrome following cerebral infarction affecting left dominant side      | 438.51 | I69.362 |
| Other paralytic syndrome following cerebral infarction affecting left dominant side      |        | I69.362 |
| Oth parlyt syndrome fol cerebral infrc aff right nondom side                             | 438.52 | I69.363 |
| Other paralytic syndrome following cerebral infarction affecting right non-dominant side | 438.52 | I69.363 |
| Other paralytic syndrome following cerebral infarction affecting right non-dominant side |        | I69.363 |
| Oth parlyt syndrome fol cerebral infrc aff left nondom side                              | 438.52 | I69.364 |
| Other paralytic syndrome following cerebral infarction affecting left non-dominant side  | 438.52 | I69.364 |
| Other paralytic syndrome following cerebral infarction affecting left non-dominant side  |        | I69.364 |
| Paralytic syndrome, bilateral S/P CVA (cerebrovascular accident)                         | 438.53 | I69.365 |
| Bilateral paralytic syndrome following cerebrovascular accident                          | 438.53 | I69.365 |
| Bilateral paralytic syndrome following CVA (cerebrovascular accident)                    | 438.53 | I69.365 |
| Paralytic syndrome, bilateral, post-stroke                                               | 438.53 | I69.365 |

|                                                                               |        |         |
|-------------------------------------------------------------------------------|--------|---------|
| Bilateral paralytic syndrome following stroke                                 | 438.53 | 169.365 |
| Bilateral paralytic syndrome following cerebrovascular accident (CVA)         | 438.53 | 169.365 |
| Other paralytic syndrome following cerebral infarction, bilateral             | 438.53 | 169.365 |
| Bilateral paralytic syndrome as late effect of stroke                         | 438.53 | 169.365 |
| Bilateral paralytic syndrome as late effect of cerebrovascular accident (CVA) | 438.53 | 169.365 |
| Other paralytic syndrome following cerebral infarction, bilateral             |        | 169.365 |
| Paralytic syndrome, post-stroke                                               | 438.5  | 169.369 |
| Paralytic syndrome dominant side S/P CVA (cerebrovascular accident)           | 438.51 | 169.369 |
| Paralytic syndrome nondominant side S/P CVA (cerebrovascular accident)        | 438.52 | 169.369 |
| Paralytic syndrome S/P CVA (cerebrovascular accident)                         | 438.5  | 169.369 |
| Paralytic syndrome following cerebrovascular accident                         | 438.5  | 169.369 |
| Paralytic syndrome following CVA (cerebrovascular accident)                   | 438.5  | 169.369 |
| Paralytic syndrome of dominant side following cerebrovascular accident        | 438.51 | 169.369 |
| Paralytic syndrome, dominant side, post-stroke                                | 438.51 | 169.369 |
| Paralytic syndrome, non-dominant side, post-stroke                            | 438.52 | 169.369 |
| Paralysis of dominant side as complication of stroke                          | 438.51 | 169.369 |
| Paralytic syndrome of nondominant side following cerebrovascular accident     | 438.52 | 169.369 |
| Paralytic syndrome affecting dominant side following cerebrovascular accident | 438.51 | 169.369 |
| Paralytic syndrome of nondominant side as late effect of stroke               | 438.52 | 169.369 |

|                                                                                     |        |         |
|-------------------------------------------------------------------------------------|--------|---------|
| Paralytic syndrome of dominant side as late effect of stroke                        | 438.51 | 169.369 |
| Paralytic syndrome as late effect of stroke                                         | 438.5  | 169.369 |
| Paralytic syndrome affecting dominant side                                          | 438.51 | 169.369 |
| Paralytic syndrome affecting dominant side following cerebrovascular accident (CVA) | 438.51 | 169.369 |
| Paralytic syndrome following cerebrovascular accident (CVA)                         | 438.5  | 169.369 |
| Paralytic syndrome of non-dominant side following cerebrovascular accident (CVA)    | 438.52 | 169.369 |
| Other paralytic syndrome following cerebral infarction affecting unspecified side   | 438.5  | 169.369 |
| Other paralytic syndrome following cerebral infarction                              | 438.5  | 169.369 |
| Oth paralytic syndrome fol cerebral infrc aff unsp side                             | 438.5  | 169.369 |
| Other paralytic syndrome following cerebral infarction affecting unspecified side   |        | 169.369 |
| Other sequelae of cerebral infarction                                               |        | 169.39  |
| Apraxia S/P CVA (cerebrovascular accident)                                          | 438.81 | 169.390 |
| Apraxia following cerebrovascular accident                                          | 438.81 | 169.390 |
| Apraxia following CVA (cerebrovascular accident)                                    | 438.81 | 169.390 |
| Apraxia due to old lacunar stroke                                                   | 438.81 | 169.390 |
| Apraxia, post-stroke                                                                | 438.81 | 169.390 |
| Apraxia following cerebral infarction                                               | 438.81 | 169.390 |
| Apraxia due to recent cerebral infarction                                           | 438.81 | 169.390 |
| Apraxia due to recent cerebrovascular accident                                      | 438.81 | 169.390 |
| Apraxia due to old brainstem infarction                                             | 438.81 | 169.390 |
| Apraxia due to recent cerebrovascular accident (CVA)                                | 438.81 | 169.390 |

|                                                                                      |                        |                           |
|--------------------------------------------------------------------------------------|------------------------|---------------------------|
| Apraxia following cerebrovascular accident (CVA)                                     | 438.81                 | 169.390                   |
| Apraxia as late effect of cerebrovascular accident (CVA)                             | 438.81                 | 169.390                   |
| Apraxia following cerebral infarction                                                |                        | 169.390                   |
| Dysphagia status post cerebrovascular accident                                       | 438.82                 | 169.391                   |
| Dysphagia S/P CVA (cerebrovascular accident)                                         | 438.82                 | 169.391                   |
| CVA, old, dysphagia                                                                  | 438.82                 | 169.391                   |
| Dysphagia following cerebrovascular accident                                         | 438.82                 | 169.391                   |
| Dysphagia due to old stroke                                                          | 438.82                 | 169.391                   |
| Dysphagia, post-stroke                                                               | 438.82                 | 169.391                   |
| Dysphagia following cerebral infarction                                              | 438.82                 | 169.391                   |
| Dysphagia as late effect of stroke                                                   | 438.82                 | 169.391                   |
| Dysphagia due to recent cerebrovascular accident                                     | 438.82                 | 169.391                   |
| Dysphagia due to recent stroke                                                       | 438.82                 | 169.391                   |
| Dysphagia due to recent cerebral infarction                                          | 438.82                 | 169.391                   |
| Dysphagia due to old cerebrovascular accident                                        | 438.82                 | 169.391                   |
| Dysphagia due to recent cerebrovascular accident (CVA)                               | 438.82                 | 169.391                   |
| Dysphagia following cerebrovascular accident (CVA)                                   | 438.82                 | 169.391                   |
| Dysphagia as late effect of cerebrovascular accident (CVA)                           | 438.82                 | 169.391                   |
| Dysphagia following cerebral infarction                                              |                        | 169.391                   |
| Hemiparesis, aphasia, and dysphagia as late effect of cerebrovascular accident (CVA) | 438.82, 438.20, 438.11 | 169.391, 169.320, 169.359 |
| Hemiparesis, aphasia, and dysphagia as late effects of stroke                        | 438.82, 438.20, 438.11 | 169.391, 169.359, 169.320 |
| Hemiparesis, aphasia, and dysphagia as late effects of cerebrovascular accident      | 438.82, 438.20, 438.11 | 169.391, 169.359, 169.320 |

|                                                                  |        |         |
|------------------------------------------------------------------|--------|---------|
| Facial weakness status post cerebrovascular accident             | 438.83 | 169.392 |
| Facial weakness S/P CVA (cerebrovascular accident)               | 438.83 | 169.392 |
| CVA, old, facial weakness                                        | 438.83 | 169.392 |
| Facial weakness due to old brainstem infarction                  | 438.83 | 169.392 |
| Facial weakness due to old cerebrovascular accident              | 438.83 | 169.392 |
| Facial weakness due to old stroke                                | 438.83 | 169.392 |
| Facial weakness due to old lacunar stroke                        | 438.83 | 169.392 |
| Facial weakness, post-stroke                                     | 438.83 | 169.392 |
| Facial weakness following cerebral infarction                    | 438.83 | 169.392 |
| Facial weakness due to recent cerebrovascular accident           | 438.83 | 169.392 |
| Facial weakness due to recent stroke                             | 438.83 | 169.392 |
| Facial weakness due to recent cerebral infarction                | 438.83 | 169.392 |
| Facial weakness due to recent cerebrovascular accident (CVA)     | 438.83 | 169.392 |
| Facial weakness following cerebrovascular accident (CVA)         | 438.83 | 169.392 |
| Facial weakness as late effect of cerebrovascular accident (CVA) | 438.83 | 169.392 |
| Facial weakness following cerebral infarction                    |        | 169.392 |
| Ataxia due to old cerebellar infarction                          | 438.84 | 169.393 |
| Ataxia due to old cerebral infarction                            | 438.84 | 169.393 |
| Ataxia due to old cerebrovascular accident                       | 438.84 | 169.393 |
| Ataxia due to old stroke                                         | 438.84 | 169.393 |
| Ataxia due to old lacunar stroke                                 | 438.84 | 169.393 |
| Ataxia, post-stroke                                              | 438.84 | 169.393 |
| Ataxia following cerebral infarction                             | 438.84 | 169.393 |
| Muscular incoordination due to old stroke                        | 438.84 | 169.393 |

|                                                                   |                |                  |
|-------------------------------------------------------------------|----------------|------------------|
| Ataxia due to recent stroke                                       | 438.84         | I69.393          |
| Ataxia due to recent cerebrovascular accident                     | 438.84         | I69.393          |
| Ataxia due to recent cerebral infarction                          | 438.84         | I69.393          |
| Multiple old cerebral infarcts with ataxia                        | 438.84         | I69.393          |
| Ataxia due to old cerebrovascular accident (CVA)                  | 438.84         | I69.393          |
| Ataxia due to recent cerebrovascular accident (CVA)               | 438.84         | I69.393          |
| Ataxia following cerebral infarction                              |                | I69.393          |
| Other late effect of cerebrovascular accident                     | 438.89         | I69.398          |
| Other late effect of recent cerebral infarction                   | 438.89         | I69.398          |
| Other sequelae of cerebral infarction                             | 438.89         | I69.398          |
| Other sequelae of cerebral infarction                             |                | I69.398          |
| Depression due to old stroke                                      | 438.89, 293.83 | I69.398, F06.31  |
| Depression as late effect of cerebrovascular accident (CVA)       | 438.89, 293.83 | I69.398, F06.31  |
| Neurobehavioral disorder following cerebrovascular accident       | 438.89, 310.9  | I69.398, F09     |
| Neurobehavioral disorder following stroke                         | 438.89, 310.9  | I69.398, F09     |
| Neurobehavioral disorder following cerebrovascular accident (CVA) | 438.89, 310.9  | I69.398, F09     |
| Seizure disorder as sequela of cerebrovascular accident           | 438.89, 345.90 | I69.398, G40.909 |
| Central sleep apnea secondary to cerebrovascular accident         | 438.89, 327.27 | I69.398, G47.37  |
| Central sleep apnea secondary to cerebrovascular accident (CVA)   | 438.89, 327.27 | I69.398, G47.37  |
| CVA, old, homonymous hemianopsia                                  | 438.7, 368.46  | I69.398, H53.469 |
| Homonymous hemianopsia following cerebrovascular accident         | 438.7, 368.46  | I69.398, H53.469 |
| Homonymous hemianopsia due to old cerebral infarction             | 438.7, 368.46  | I69.398, H53.469 |



|                                                                     |               |                  |
|---------------------------------------------------------------------|---------------|------------------|
| Multiple old cerebral infarcts with homonymous hemianopsia          | 438.7, 368.46 | 169.398, H53.469 |
| Homonymous hemianopsia due to recent cerebrovascular accident       | 438.7, 368.46 | 169.398, H53.469 |
| Homonymous hemianopsia due to recent stroke                         | 438.7, 368.46 | 169.398, H53.469 |
| Homonymous hemianopsia due to recent cerebral infarction            | 438.7, 368.46 | 169.398, H53.469 |
| Homonymous hemianopsia due to recent cerebrovascular accident (CVA) | 438.7, 368.46 | 169.398, H53.469 |
| Homonymous hemianopsia following cerebrovascular accident (CVA)     | 438.7, 368.46 | 169.398, H53.469 |
| Vision disturbance S/P CVA (cerebrovascular accident)               | 438.7         | 169.398, H53.9   |
| Vision disturbance following cerebrovascular accident               | 438.7         | 169.398, H53.9   |
| Vision disturbance following CVA (cerebrovascular accident)         | 438.7         | 169.398, H53.9   |
| CVA, old, disturbances of vision                                    | 438.7         | 169.398, H53.9   |
| Visual disturbance due to old lacunar stroke                        | 438.7         | 169.398, H53.9   |
| Visual disturbance as complication of stroke                        | 438.7         | 169.398, H53.9   |
| Visual disturbance due to recent cerebrovascular accident           | 438.7         | 169.398, H53.9   |
| Visual disturbance due to recent stroke                             | 438.7         | 169.398, H53.9   |
| Disturbances of vision, late effect of stroke                       | 438.7         | 169.398, H53.9   |
| Visual disturbance due to recent cerebral infarction                | 438.7         | 169.398, H53.9   |
| Visual disturbance due to recent cerebrovascular accident (CVA)     | 438.7         | 169.398, H53.9   |
| Visual disturbance following cerebrovascular accident (CVA)         | 438.7         | 169.398, H53.9   |
| Visual disturbance as late effect of cerebrovascular accident (CVA) | 438.7         | 169.398, H53.9   |
| Visual field loss following cerebrovascular accident                | 438.7         | 169.398, H54.7   |

|                                                                            |               |                 |
|----------------------------------------------------------------------------|---------------|-----------------|
| Visual field loss, post-stroke                                             | 438.7         | I69.398, H54.7  |
| Visual field loss following stroke                                         | 438.7         | I69.398, H54.7  |
| Visual field loss following cerebrovascular accident (CVA)                 | 438.7         | I69.398, H54.7  |
| Neurogenic pain due to central nervous system abnormality following stroke | 438.89, 729.2 | I69.398, M79.2  |
| Alterations of sensations S/P CVA (cerebrovascular accident)               | 438.6         | I69.398, R20.9  |
| Alterations of sensations following cerebrovascular accident               | 438.6         | I69.398, R20.9  |
| Alterations of sensations following CVA (cerebrovascular accident)         | 438.6         | I69.398, R20.9  |
| CVA, old, alterations of sensations                                        | 438.6         | I69.398, R20.9  |
| Altered sensation due to old lacunar stroke                                | 438.6         | I69.398, R20.9  |
| Alteration of sensations, post-stroke                                      | 438.6         | I69.398, R20.9  |
| Altered sensation due to recent cerebral infarction                        | 438.6         | I69.398, R20.9  |
| Altered sensation due to recent stroke                                     | 438.6         | I69.398, R20.9  |
| Alteration of sensation as late effect of stroke                           | 438.6         | I69.398, R20.9  |
| Alteration of sensation as late effect of cerebrovascular accident         | 438.6         | I69.398, R20.9  |
| Alterations of sensations following cerebrovascular accident (CVA)         | 438.6         | I69.398, R20.9  |
| Alteration of sensation as late effect of cerebrovascular accident (CVA)   | 438.6         | I69.398, R20.9  |
| Impaired balance as late effect of cerebrovascular accident                | 438.89, 781.2 | I69.398, R26.89 |
| Imbalance due to old stroke                                                | 438.89, 781.2 | I69.398, R26.89 |
| Impaired balance as late effect of cerebrovascular accident (CVA)          | 438.89, 781.2 | I69.398, R26.89 |
| Abnormality of gait following cerebrovascular accident                     | 438.89, 781.2 | I69.398, R26.9  |
| Gait disturbance, post-stroke                                              | 438.89, 781.2 | I69.398, R26.9  |
| Abnormality of gait following cerebrovascular accident (CVA)               | 438.89, 781.2 | I69.398, R26.9  |

|                                                                             |                |                |
|-----------------------------------------------------------------------------|----------------|----------------|
| Abnormality of gait as late effect of cerebrovascular accident (CVA)        | 438.89         | 169.398, R26.9 |
| Abnormality of gait as late effect of stroke                                | 438.89         | 169.398, R26.9 |
| Vertigo as late effect of stroke                                            | 438.85         | 169.398, R42   |
| Vertigo S/P CVA (cerebrovascular accident)                                  | 438.85         | 169.398, R42   |
| Vertigo following cerebrovascular accident                                  | 438.85         | 169.398, R42   |
| Vertigo following CVA (cerebrovascular accident)                            | 438.85         | 169.398, R42   |
| Vertigo due to previous cerebellar infarction                               | 438.85         | 169.398, R42   |
| Vertigo, post-stroke                                                        | 438.85         | 169.398, R42   |
| Vertigo following cerebrovascular accident (CVA)                            | 438.85         | 169.398, R42   |
| Pain after cerebrovascular accident (CVA)                                   | 438.89, 780.96 | 169.398, R52   |
| Weakness status post cerebrovascular accident                               | 438.89, 780.79 | 169.398, R53.1 |
| Weakness S/P CVA (cerebrovascular accident)                                 | 438.89, 780.79 | 169.398, R53.1 |
| Weakness following cerebrovascular accident (CVA)                           | 438.89, 780.79 | 169.398, R53.1 |
| Seizure as late effect of cerebrovascular accident (CVA)                    | 438.89, 780.39 | 169.398, R56.9 |
| Seizure, late effect of stroke                                              | 438.89, 780.39 | 169.398, R56.9 |
| Sequelae of other cerebrovascular diseases                                  |                | 169.8          |
| Unspecified sequelae of other cerebrovascular disease                       | 438.9          | 169.80         |
| Unspecified sequelae of other cerebrovascular disease                       |                | 169.80         |
| Cognitive deficits following other cerebrovascular disease                  |                | 169.81         |
| Attention and concentration deficit following other cerebrovascular disease | 438            | 169.810        |
| Attention and concentration deficit following other cerebrovascular disease |                | 169.810        |

|                                                                                                      |                       |         |
|------------------------------------------------------------------------------------------------------|-----------------------|---------|
| Memory deficit following other cerebrovascular disease                                               | 438.0, 780.93         | 169.811 |
| Memory deficit following other cerebrovascular disease                                               |                       | 169.811 |
| Visuospatial deficit and spatial neglect following other cerebrovascular disease                     | 438.89, 799.53, 781.8 | 169.812 |
| Visuospatial deficit and spatial neglect following other cerebrovascular disease                     |                       | 169.812 |
| Psychomotor deficit following other cerebrovascular disease                                          | 438.89, 799.54        | 169.813 |
| Psychomotor deficit following other cerebrovascular disease                                          |                       | 169.813 |
| Frontal lobe and executive function deficit following other cerebrovascular disease                  | 438                   | 169.814 |
| Frontal lobe and executive function deficit following other cerebrovascular disease                  |                       | 169.814 |
| Cognitive social or emotional deficit following other cerebrovascular disease                        | 438                   | 169.815 |
| Cognitive social or emotional deficit following other cerebrovascular disease                        |                       | 169.815 |
| Other symptoms and signs involving cognitive functions following other cerebrovascular disease       | 799.59                | 169.818 |
| Other symptoms and signs involving cognitive functions following other cerebrovascular disease       |                       | 169.818 |
| Cognitive deficits following other cerebrovascular disease                                           | 438                   | 169.819 |
| Unspecified symptoms and signs involving cognitive functions following other cerebrovascular disease | 438                   | 169.819 |
| Unspecified symptoms and signs involving cognitive functions following other cerebrovascular disease |                       | 169.819 |
| Speech and language deficits following other cerebrovascular disease                                 |                       | 169.82  |

|                                                                                                     |        |         |
|-----------------------------------------------------------------------------------------------------|--------|---------|
| Aphasia following other cerebrovascular disease                                                     | 438.11 | 169.820 |
| Aphasia following other cerebrovascular disease                                                     |        | 169.820 |
| Dysphasia following other cerebrovascular disease                                                   | 438.12 | 169.821 |
| Dysphasia following other cerebrovascular disease                                                   |        | 169.821 |
| Dysarthria following other cerebrovascular disease                                                  | 438.13 | 169.822 |
| Dysarthria following other cerebrovascular disease                                                  |        | 169.822 |
| Fluency disorder following other cerebrovascular disease                                            | 438.14 | 169.823 |
| Fluency disorder following other cerebrovascular disease                                            |        | 169.823 |
| Oth speech/lang deficits following oth cerebvasc disease                                            | 438.19 | 169.828 |
| Other speech and language deficits following other cerebrovascular disease                          | 438.19 | 169.828 |
| Other speech and language deficits following other cerebrovascular disease                          |        | 169.828 |
| Monoplegia of upper limb following other cerebrovascular disease                                    |        | 169.83  |
| Monopl g upr lmb fol oth cerebvasc disease aff right dom side                                       | 438.31 | 169.831 |
| Monoplegia of upper limb following other cerebrovascular disease affecting right dominant side      | 438.31 | 169.831 |
| Monoplegia of upper extremity following other cerebrovascular disease affecting right dominant side | 438.31 | 169.831 |
| Monoplegia of upper limb following other cerebrovascular disease affecting right dominant side      |        | 169.831 |
| Monopl g upr lmb fol oth cerebvasc disease aff left dom side                                        | 438.31 | 169.832 |

|                                                                                                         |        |         |
|---------------------------------------------------------------------------------------------------------|--------|---------|
| Monoplegia of upper limb following other cerebrovascular disease affecting left dominant side           | 438.31 | 169.832 |
| Monoplegia of upper extremity following other cerebrovascular disease affecting left dominant side      | 438.31 | 169.832 |
| Monoplegia of upper limb following other cerebrovascular disease affecting left dominant side           |        | 169.832 |
| Monoplg upr lmb fol oth cerebvasc dis aff right nondom side                                             | 438.32 | 169.833 |
| Monoplegia of upper limb following other cerebrovascular disease affecting right non-dominant side      | 438.32 | 169.833 |
| Monoplegia of upper extremity following other cerebrovascular disease affecting right non-dominant side | 438.32 | 169.833 |
| Monoplegia of upper limb following other cerebrovascular disease affecting right non-dominant side      |        | 169.833 |
| Monoplg upr lmb fol oth cerebvasc dis aff left nondom side                                              | 438.32 | 169.834 |
| Monoplegia of upper limb following other cerebrovascular disease affecting left non-dominant side       | 438.32 | 169.834 |
| Monoplegia of upper extremity following other cerebrovascular disease affecting left non-dominant side  | 438.32 | 169.834 |
| Monoplegia of upper limb following other cerebrovascular disease affecting left non-dominant side       |        | 169.834 |
| Monoplg upr lmb fol oth cerebvasc disease aff unsp side                                                 | 438.3  | 169.839 |
| Monoplegia of upper limb following other cerebrovascular disease affecting unspecified side             | 438.3  | 169.839 |

|                                                                                                     |        |         |
|-----------------------------------------------------------------------------------------------------|--------|---------|
| Monoplegia of upper extremity following other cerebrovascular disease, unspecified laterality       | 438.3  | I69.839 |
| Monoplegia of upper limb following other cerebrovascular disease affecting unspecified side         |        | I69.839 |
| Monoplegia of lower limb following other cerebrovascular disease                                    |        | I69.84  |
| Monoplg low lmb fol oth cerebvasc disease aff right dom side                                        | 438.41 | I69.841 |
| Monoplegia of lower limb following other cerebrovascular disease affecting right dominant side      | 438.41 | I69.841 |
| Monoplegia of lower extremity following other cerebrovascular disease affecting right dominant side | 438.41 | I69.841 |
| Monoplegia of lower limb following other cerebrovascular disease affecting right dominant side      |        | I69.841 |
| Monoplg low lmb fol oth cerebvasc disease aff left dom side                                         | 438.41 | I69.842 |
| Monoplegia of lower limb following other cerebrovascular disease affecting left dominant side       | 438.41 | I69.842 |
| Monoplegia of lower extremity following other cerebrovascular disease affecting left dominant side  | 438.41 | I69.842 |
| Monoplegia of lower limb following other cerebrovascular disease affecting left dominant side       |        | I69.842 |
| Monoplg low lmb fol oth cerebvasc dis aff right nondom side                                         | 438.42 | I69.843 |
| Monoplegia of lower limb following other cerebrovascular disease affecting right non-dominant side  | 438.42 | I69.843 |

|                                                                                                         |        |         |
|---------------------------------------------------------------------------------------------------------|--------|---------|
| Monoplegia of lower extremity following other cerebrovascular disease affecting right non-dominant side | 438.42 | 169.843 |
| Monoplegia of lower limb following other cerebrovascular disease affecting right non-dominant side      |        | 169.843 |
| Monoplg low lmb fol oth cerebvasc dis aff left nondom side                                              | 438.42 | 169.844 |
| Monoplegia of lower limb following other cerebrovascular disease affecting left non-dominant side       | 438.42 | 169.844 |
| Monoplegia of lower extremity following other cerebrovascular disease affecting left non-dominant side  | 438.42 | 169.844 |
| Monoplegia of lower limb following other cerebrovascular disease affecting left non-dominant side       |        | 169.844 |
| Monoplg low lmb fol oth cerebvasc disease aff unsp side                                                 | 438.4  | 169.849 |
| Monoplegia of lower limb following other cerebrovascular disease affecting unspecified side             | 438.4  | 169.849 |
| Monoplegia of lower extremity following other cerebrovascular disease, unspecified laterality           | 438.4  | 169.849 |
| Monoplegia of lower limb following other cerebrovascular disease affecting unspecified side             |        | 169.849 |
| Hemiplegia and hemiparesis following other cerebrovascular disease                                      |        | 169.85  |
| Hemiplegia and hemiparesis following other cerebrovascular disease affecting right dominant side        | 438.21 | 169.851 |
| Hemiplga fol oth cerebvasc disease aff right dominant side                                              | 438.21 | 169.851 |



|                                                                                                        |        |         |
|--------------------------------------------------------------------------------------------------------|--------|---------|
| Hemiplegia of right dominant side due to other cerebrovascular disease, unspecified hemiplegia type    | 438.21 | 169.851 |
| Hemiplegia and hemiparesis following other cerebrovascular disease affecting right dominant side       |        | 169.851 |
| Hemiplegia of other cerebrovascular disease affecting left dominant side                               | 438.21 | 169.852 |
| Hemiplegia and hemiparesis following other cerebrovascular disease affecting left dominant side        | 438.21 | 169.852 |
| Hemiplegia of left dominant side due to other cerebrovascular disease, unspecified hemiplegia type     | 438.21 | 169.852 |
| Hemiplegia and hemiparesis following other cerebrovascular disease affecting left dominant side        |        | 169.852 |
| Hemiplegia of other cerebrovascular disease affecting right nondominant side                           | 438.22 | 169.853 |
| Hemiplegia and hemiparesis following other cerebrovascular disease affecting right non-dominant side   | 438.22 | 169.853 |
| Hemiplegia of right nondominant side due to other cerebrovascular disease, unspecified hemiplegia type | 438.22 | 169.853 |
| Hemiplegia and hemiparesis following other cerebrovascular disease affecting right non-dominant side   |        | 169.853 |
| Hemiplegia and hemiparesis following other cerebrovascular disease affecting left non-dominant side    | 438.22 | 169.854 |
| Hemiplegia of other cerebrovascular disease affecting left nondominant side                            | 438.22 | 169.854 |
| Hemiplegia of left nondominant side due to other cerebrovascular disease, unspecified hemiplegia type  | 438.22 | 169.854 |

|                                                                                                     |             |         |
|-----------------------------------------------------------------------------------------------------|-------------|---------|
| Hemiplegia and hemiparesis following other cerebrovascular disease affecting left non-dominant side |             | 169.854 |
| Hemiparesis as late effect of cerebral aneurysm                                                     | 438.2       | 169.859 |
| Hemiplegia and hemiparesis following other cerebrovascular disease affecting unspecified side       | 438.2       | 169.859 |
| Hemiplegia following other cerebrovascular disease affecting unspecified side                       | 438.2       | 169.859 |
| Spastic hemiplegia due to other cerebrovascular disease, unspecified hemiplegia laterality          | 438.20, 436 | 169.859 |
| Hemiplegia and hemiparesis following other cerebrovascular disease affecting unspecified side       |             | 169.859 |
| Other paralytic syndrome following other cerebrovascular disease                                    |             | 169.86  |
| Other paralytic syndrome following other cerebrovascular disease affecting right dominant side      | 438.51      | 169.861 |
| Other paralytic syndrome following other cerebrovascular disease affecting right dominant side      | 438.51      | 169.861 |
| Other paralytic syndrome following other cerebrovascular disease affecting right dominant side      |             | 169.861 |
| Other paralytic syndrome following other cerebrovascular disease affecting left dominant side       | 438.51      | 169.862 |
| Other paralytic syndrome following other cerebrovascular disease affecting left dominant side       | 438.51      | 169.862 |
| Other paralytic syndrome following other cerebrovascular disease affecting left dominant side       |             | 169.862 |
| Other paralytic syndrome following other cerebrovascular disease affecting right nondominant side   | 438.52      | 169.863 |

|                                                                                                    |        |         |
|----------------------------------------------------------------------------------------------------|--------|---------|
| Other paralytic syndrome following other cerebrovascular disease affecting right non-dominant side | 438.52 | 169.863 |
| Other paralytic syndrome following other cerebrovascular disease affecting right non-dominant side |        | 169.863 |
| Oth parlyt synd fol oth cerebvasc dis aff left nondom side                                         | 438.52 | 169.864 |
| Other paralytic syndrome following other cerebrovascular disease affecting left non-dominant side  | 438.52 | 169.864 |
| Other paralytic syndrome following other cerebrovascular disease affecting left non-dominant side  |        | 169.864 |
| Oth paralytic syndrome following oth cerebvasc disease, bi                                         | 438.53 | 169.865 |
| Other paralytic syndrome following other cerebrovascular disease, bilateral                        | 438.53 | 169.865 |
| Other paralytic syndrome following other cerebrovascular disease, bilateral                        |        | 169.865 |
| Oth parlyt syndrome fol oth cerebvasc disease aff unsp side                                        | 438.5  | 169.869 |
| Other paralytic syndrome following other cerebrovascular disease affecting unspecified side        | 438.5  | 169.869 |
| Other paralytic syndrome following other cerebrovascular disease                                   | 438.5  | 169.869 |
| Other paralytic syndrome following other cerebrovascular disease affecting unspecified side        |        | 169.869 |
| Other sequelae of other cerebrovascular disease                                                    |        | 169.89  |
| Apraxia following other cerebrovascular disease                                                    | 438.81 | 169.890 |
| Apraxia following other cerebrovascular disease                                                    |        | 169.890 |

|                                                                                |              |                |
|--------------------------------------------------------------------------------|--------------|----------------|
| Dysphagia following other cerebrovascular disease                              | 438.82       | 169.891        |
| Dysphagia following other cerebrovascular disease                              |              | 169.891        |
| Facial weakness following other cerebrovascular disease                        | 438.83       | 169.892        |
| Facial weakness following other cerebrovascular disease                        |              | 169.892        |
| Ataxia following other cerebrovascular disease                                 | 438.84       | 169.893        |
| Ataxia following other cerebrovascular disease                                 |              | 169.893        |
| History of lateralizing motor deficit following cerebrovascular accident       | 438.89       | 169.898        |
| History of lateralizing motor deficit following cerebrovascular accident (CVA) | 438.89       | 169.898        |
| Other sequelae of other cerebrovascular disease                                | 438.89       | 169.898        |
| Other sequelae of other cerebrovascular disease                                |              | 169.898        |
| Alterations of sensations, late effect of cerebrovascular disease              | 438.6, 782.0 | 169.898, R20.8 |
| Multiple old cerebral infarcts with alterations of sensation                   | 438.6, 782.0 | 169.898, R20.9 |
| Sequelae of unspecified cerebrovascular diseases                               |              | 169.9          |
| Unspecified late effects of cerebrovascular disease                            | 438.9        | 169.90         |
| Late effects of cerebrovascular disease                                        | 438.9        | 169.90         |
| Late, effect, cerebrovascular disease                                          | 438.9        | 169.90         |
| Sequelae of cerebrovascular disease                                            | 438.9        | 169.90         |
| Late effects of CVA (cerebrovascular accident)                                 | 438.9        | 169.90         |
| Personal history of cerebrovascular accident with residual effects             | 438.9        | 169.90         |
| History of cerebrovascular accident with residual effects                      | 438.9        | 169.90         |

|                                                                                        |                      |         |
|----------------------------------------------------------------------------------------|----------------------|---------|
| Cerebrovascular accident, late effects                                                 | 438.9                | I69.90  |
| Late effects of cerebrovascular accident                                               | 438.9                | I69.90  |
| History of cerebrovascular accident with current residual effects                      | 438.9                | I69.90  |
| Personal history of cerebrovascular accident with current residual effects             | 438.9                | I69.90  |
| Unspecified sequelae of unspecified cerebrovascular disease                            | 438.9                | I69.90  |
| Unspecified sequelae of unspecified cerebrovascular disease                            |                      | I69.90  |
| Cognitive deficits following unspecified cerebrovascular disease                       |                      | I69.91  |
| Attention and concentration deficit following unspecified cerebrovascular disease      | 438                  | I69.910 |
| Attention and concentration deficit following unspecified cerebrovascular disease      |                      | I69.910 |
| Memory deficit after cerebrovascular disease                                           | 438.0, 780.93        | I69.911 |
| Memory deficit following unspecified cerebrovascular disease                           | 438.0, 780.93        | I69.911 |
| Memory deficit following unspecified cerebrovascular disease                           |                      | I69.911 |
| Visuospatial deficit and spatial neglect after cerebrovascular disease                 | 438.7, 799.53, 781.8 | I69.912 |
| Visuospatial deficit and spatial neglect following unspecified cerebrovascular disease | 438.7, 799.53, 781.8 | I69.912 |
| Visuospatial deficit and spatial neglect following unspecified cerebrovascular disease |                      | I69.912 |
| Psychomotor deficit after cerebrovascular disease                                      | 438.89, 799.54       | I69.913 |
| Psychomotor deficit following unspecified cerebrovascular disease                      | 438.89, 799.54       | I69.913 |

|                                                                                                            |        |         |
|------------------------------------------------------------------------------------------------------------|--------|---------|
| Psychomotor deficit following unspecified cerebrovascular disease                                          |        | 169.913 |
| Frontal lobe and executive function deficit following unspecified cerebrovascular disease                  | 438    | 169.914 |
| Frontal lobe and executive function deficit following unspecified cerebrovascular disease                  |        | 169.914 |
| Cognitive social or emotional deficit following unspecified cerebrovascular disease                        | 438    | 169.915 |
| Cognitive social or emotional deficit following unspecified cerebrovascular disease                        |        | 169.915 |
| Other symptoms and signs involving cognitive functions following unspecified cerebrovascular disease       | 799.59 | 169.918 |
| Other symptoms and signs involving cognitive functions following unspecified cerebrovascular disease       |        | 169.918 |
| Cognitive deficits, late effect of cerebrovascular disease                                                 | 438    | 169.919 |
| Cognitive deficits following cerebrovascular disease                                                       | 438    | 169.919 |
| Cognitive deficits as late effect of cerebrovascular disease                                               | 438    | 169.919 |
| Cognitive deficits following unspecified cerebrovascular disease                                           | 438    | 169.919 |
| Unspecified symptoms and signs involving cognitive functions following unspecified cerebrovascular disease | 438    | 169.919 |
| Unspecified symptoms and signs involving cognitive functions following unspecified cerebrovascular disease |        | 169.919 |
| Speech and language deficits following unspecified cerebrovascular disease                                 |        | 169.92  |

|                                                            |        |         |
|------------------------------------------------------------|--------|---------|
| Aphasia, late effect of cerebrovascular disease            | 438.11 | 169.920 |
| Aphasia due to late effects of cerebrovascular disease     | 438.11 | 169.920 |
| Aphasia following cerebrovascular disease                  | 438.11 | 169.920 |
| Aphasia following unspecified cerebrovascular disease      | 438.11 | 169.920 |
| Aphasia following unspecified cerebrovascular disease      |        | 169.920 |
| Dysphasia, late effect of cerebrovascular disease          | 438.12 | 169.921 |
| Dysphasia due to cerebrovascular disease                   | 438.12 | 169.921 |
| Dysphasia following cerebrovascular disease                | 438.12 | 169.921 |
| Dysphasia as late effect of cerebrovascular disease        | 438.12 | 169.921 |
| Dysphasia following unspecified cerebrovascular disease    | 438.12 | 169.921 |
| Dysphasia following unspecified cerebrovascular disease    |        | 169.921 |
| Dysarthria as late effect of cerebrovascular disease       | 438.13 | 169.922 |
| Late effects of cerebrovascular disease, dysarthria        | 438.13 | 169.922 |
| Dysarthria following cerebrovascular disease               | 438.13 | 169.922 |
| Dysarthria following unspecified cerebrovascular disease   | 438.13 | 169.922 |
| Dysarthria following unspecified cerebrovascular disease   |        | 169.922 |
| Fluency disorder as late effect of cerebrovascular disease | 438.14 | 169.923 |
| Stuttering as late effect of cerebrovascular disease       | 438.14 | 169.923 |
| Late effects of cerebrovascular disease, fluency disorder  | 438.14 | 169.923 |

|                                                                                    |        |         |
|------------------------------------------------------------------------------------|--------|---------|
| Stuttering due to late effect of cerebrovascular disease                           | 438.14 | 169.923 |
| Fluency disorder due to late effect of cerebrovascular accident                    | 438.14 | 169.923 |
| Fluency disorder following cerebrovascular accident                                | 438.14 | 169.923 |
| Fluency disorder following cerebrovascular disease                                 | 438.14 | 169.923 |
| Fluency disorder following unspecified cerebrovascular disease                     | 438.14 | 169.923 |
| Fluency disorder following unspecified cerebrovascular disease                     |        | 169.923 |
| Speech and language deficit, unspecified, late effect of cerebrovascular disease   | 438.1  | 169.928 |
| Other speech and language deficits, late effect of cerebrovascular disease(438.19) | 438.19 | 169.928 |
| Speech and language deficits, late effect of cerebrovascular disease               | 438.1  | 169.928 |
| Speech and language deficit, late effect of cerebrovascular disease                | 438.1  | 169.928 |
| Late ef-spch/lng def NOS                                                           | 438.1  | 169.928 |
| Other speech and language deficits following unspecified cerebrovascular disease   | 438.19 | 169.928 |
| Other speech and language deficits, late effect of cerebrovascular disease         | 438.19 | 169.928 |
| Oth speech/lang deficits following unsp cerebvasc disease                          | 438.19 | 169.928 |
| Other speech and language deficits following unspecified cerebrovascular disease   |        | 169.928 |
| Monoplegia of upper limb following unspecified cerebrovascular disease             |        | 169.93  |
| Monoplegia of arm after cerebrovasc disease affect right dominant side             | 438.31 | 169.931 |



|                                                                                                                                         |        |         |
|-----------------------------------------------------------------------------------------------------------------------------------------|--------|---------|
| Monoplegia of upper extremity following cerebrovascular disease affecting right dominant side                                           | 438.31 | 169.931 |
| Monoplegia of upper limb following unspecified cerebrovascular disease affecting right dominant side                                    | 438.31 | 169.931 |
| Monoplg upr lmb fol unsp cerebvasc dis aff right dom side                                                                               | 438.31 | 169.931 |
| Monoplegia of upper extremity following cerebrovascular disease affecting right dominant side, unspecified cerebrovascular disease type | 438.31 | 169.931 |
| Monoplegia of upper limb following unspecified cerebrovascular disease affecting right dominant side                                    |        | 169.931 |
| Monoplegia of arm after cerebrovasc disease affect left dominant side                                                                   | 438.31 | 169.932 |
| Monoplegia of upper extremity following cerebrovascular disease affecting left dominant side                                            | 438.31 | 169.932 |
| Monoplegia of upper limb following unspecified cerebrovascular disease affecting left dominant side                                     | 438.31 | 169.932 |
| Monoplg upr lmb fol unsp cerebvasc disease aff left dom side                                                                            | 438.31 | 169.932 |
| Monoplegia of upper extremity following cerebrovascular disease affecting left dominant side, unspecified cerebrovascular disease type  | 438.31 | 169.932 |
| Monoplegia of upper limb following unspecified cerebrovascular disease affecting left dominant side                                     |        | 169.932 |
| Monoplegia of upper extremity following cerebrovascular disease affecting right non-dominant side                                       | 438.32 | 169.933 |

|                                                                                                                                             |        |         |
|---------------------------------------------------------------------------------------------------------------------------------------------|--------|---------|
| Monoplegia of upper limb following unspecified cerebrovascular disease affecting right non-dominant side                                    | 438.32 | 169.933 |
| Monoplg upr lmb fol unsp cerebvasc dis aff right nondom side                                                                                | 438.32 | 169.933 |
| Monoplegia of upper extremity following cerebrovascular disease affecting right non-dominant side, unspecified cerebrovascular disease type | 438.32 | 169.933 |
| Monoplegia of upper limb following unspecified cerebrovascular disease affecting right non-dominant side                                    |        | 169.933 |
| Monoplegia arm after cerebrovasc disease affect left non-dominant side                                                                      | 438.32 | 169.934 |
| Monoplegia of upper extremity following cerebrovascular disease affecting left non-dominant side                                            | 438.32 | 169.934 |
| Monoplegia of upper limb following unspecified cerebrovascular disease affecting left non-dominant side                                     | 438.32 | 169.934 |
| Monoplg upr lmb fol unsp cerebvasc dis aff left nondom side                                                                                 | 438.32 | 169.934 |
| Monoplegia of upper extremity following cerebrovascular disease affecting left non-dominant side, unspecified cerebrovascular disease type  | 438.32 | 169.934 |
| Monoplegia of upper limb following unspecified cerebrovascular disease affecting left non-dominant side                                     |        | 169.934 |
| Monoplegia of upper limb affecting unspecified side, late effect of cerebrovascular disease                                                 | 438.3  | 169.939 |
| Monoplegia of upper limb affecting dominant side, late effect of cerebrovascular disease                                                    | 438.31 | 169.939 |

|                                                                                                                                   |        |         |
|-----------------------------------------------------------------------------------------------------------------------------------|--------|---------|
| Monoplegia of upper limb affecting nondominant side, late effect of cerebrovascular disease                                       | 438.32 | 169.939 |
| Monoplegia of upper limb, late effect of cerebrovascular disease                                                                  | 438.3  | 169.939 |
| Monoplegia of upper extremity following cerebrovascular disease                                                                   | 438.3  | 169.939 |
| Monoplegia arm affect dominant side, late effect cerebrovasc disease                                                              | 438.31 | 169.939 |
| Monoplegia of upper extremity affecting dominant side, late effect of cerebrovascular disease                                     | 438.31 | 169.939 |
| Monoplegia of upper extremity, late effect of cerebrovascular disease                                                             | 438.3  | 169.939 |
| Monoplegia of upper extremity affecting nondominant side, late effect of cerebrovascular disease                                  | 438.32 | 169.939 |
| Late eff,CVD,monopleg ulimb                                                                                                       | 438.3  | 169.939 |
| Late eff,CVD,monopleg ulimb, dom                                                                                                  | 438.31 | 169.939 |
| Late eff,CVD,monopleg ulimb,nond                                                                                                  | 438.32 | 169.939 |
| Monoplegia of upper limb following unspecified cerebrovascular disease affecting unspecified side                                 | 438.3  | 169.939 |
| Monoplgl upr lmb fol unsp cerebvasc disease aff unsp side                                                                         | 438.3  | 169.939 |
| Monoplegia of upper extremity following cerebrovascular disease, unspecified cerebrovascular disease type, unspecified laterality | 438.3  | 169.939 |
| Monoplegia of upper limb following unspecified cerebrovascular disease affecting unspecified side                                 |        | 169.939 |
| Monoplegia of lower limb following unspecified cerebrovascular disease                                                            |        | 169.94  |
| Monoplegia of leg after cerebrovasc disease affect right dominant side                                                            | 438.41 | 169.941 |

|                                                                                                                                         |        |         |
|-----------------------------------------------------------------------------------------------------------------------------------------|--------|---------|
| Monoplegia of lower extremity following cerebrovascular disease affecting right dominant side                                           | 438.41 | 169.941 |
| Monoplegia of lower limb following unspecified cerebrovascular disease affecting right dominant side                                    | 438.41 | 169.941 |
| Monoplg low lmb fol unsp cerebvasc dis aff right dom side                                                                               | 438.41 | 169.941 |
| Monoplegia of lower extremity following cerebrovascular disease affecting right dominant side, unspecified cerebrovascular disease type | 438.41 | 169.941 |
| Monoplegia of lower limb following unspecified cerebrovascular disease affecting right dominant side                                    |        | 169.941 |
| Monoplegia of leg after cerebrovasc disease affect left dominant side                                                                   | 438.41 | 169.942 |
| Monoplegia of lower extremity following cerebrovascular disease affecting left dominant side                                            | 438.41 | 169.942 |
| Monoplegia of lower limb following unspecified cerebrovascular disease affecting left dominant side                                     | 438.41 | 169.942 |
| Monoplg low lmb fol unsp cerebvasc disease aff left dom side                                                                            | 438.41 | 169.942 |
| Monoplegia of lower extremity following cerebrovascular disease affecting left dominant side, unspecified cerebrovascular disease type  | 438.41 | 169.942 |
| Monoplegia of lower limb following unspecified cerebrovascular disease affecting left dominant side                                     |        | 169.942 |
| Monoplegia of lower extremity following cerebrovascular disease affecting right non-dominant side                                       | 438.42 | 169.943 |

|                                                                                                                                             |        |         |
|---------------------------------------------------------------------------------------------------------------------------------------------|--------|---------|
| Monoplegia of lower limb following unspecified cerebrovascular disease affecting right non-dominant side                                    | 438.42 | 169.943 |
| Monoplg low lmb fol unsp cerebvasc dis aff right nondom side                                                                                | 438.42 | 169.943 |
| Monoplegia of lower extremity following cerebrovascular disease affecting right non-dominant side, unspecified cerebrovascular disease type | 438.42 | 169.943 |
| Monoplegia of lower limb following unspecified cerebrovascular disease affecting right non-dominant side                                    |        | 169.943 |
| Monoplegia leg after cerebrovasc disease affect left non-dominant side                                                                      | 438.42 | 169.944 |
| Monoplegia of lower extremity following cerebrovascular disease affecting left non-dominant side                                            | 438.42 | 169.944 |
| Monoplegia of lower limb following unspecified cerebrovascular disease affecting left non-dominant side                                     | 438.42 | 169.944 |
| Monoplg low lmb fol unsp cerebvasc dis aff left nondom side                                                                                 | 438.42 | 169.944 |
| Monoplegia of lower extremity following cerebrovascular disease affecting left non-dominant side, unspecified cerebrovascular disease type  | 438.42 | 169.944 |
| Monoplegia of lower limb following unspecified cerebrovascular disease affecting left non-dominant side                                     |        | 169.944 |
| Monoplegia of lower limb affecting unspecified side, late effect of cerebrovascular disease                                                 | 438.4  | 169.949 |
| Monoplegia of lower limb affecting dominant side, late effect of cerebrovascular disease                                                    | 438.41 | 169.949 |

|                                                                                                                                   |        |         |
|-----------------------------------------------------------------------------------------------------------------------------------|--------|---------|
| Monoplegia of lower limb affecting nondominant side, late effect of cerebrovascular disease                                       | 438.42 | 169.949 |
| Monoplegia of lower limb due to cerebrovascular disease                                                                           | 438.4  | 169.949 |
| Monoplegia of lower limb, late effect of cerebrovascular disease                                                                  | 438.4  | 169.949 |
| Monoplegia of lower limb, nondominant, due to cerebrovascular disease                                                             | 438.42 | 169.949 |
| Monoplegia of lower extremity following cerebrovascular disease                                                                   | 438.4  | 169.949 |
| Monoplegia leg affect dominant side, late effect cerebrovasc disease                                                              | 438.41 | 169.949 |
| Monoplegia of lower extremity affecting nondominant side, late effect of cerebrovascular disease                                  | 438.42 | 169.949 |
| Monoplegia of lower extremity affecting dominant side, late effect of cerebrovascular disease                                     | 438.41 | 169.949 |
| Monoplegia of lower extremity, late effect of cerebrovascular disease                                                             | 438.4  | 169.949 |
| Late eff,CVD,monopleg llimb                                                                                                       | 438.4  | 169.949 |
| Late eff,CVD,monopleg llimb, dom                                                                                                  | 438.41 | 169.949 |
| Late eff,CVD,monopleg llimb,nond                                                                                                  | 438.42 | 169.949 |
| Monoplegia of lower limb following unspecified cerebrovascular disease affecting unspecified side                                 | 438.4  | 169.949 |
| Monoplglow lmb fol unsp cerebvasc disease aff unsp side                                                                           | 438.4  | 169.949 |
| Monoplegia of lower extremity following cerebrovascular disease, unspecified cerebrovascular disease type, unspecified laterality | 438.4  | 169.949 |
| Monoplegia of lower limb following unspecified cerebrovascular disease affecting unspecified side                                 |        | 169.949 |

|                                                                                                                                         |        |         |
|-----------------------------------------------------------------------------------------------------------------------------------------|--------|---------|
| Hemiplegia and hemiparesis following unspecified cerebrovascular disease                                                                |        | 169.95  |
| Hemiplegia following unspecified cerebrovascular disease affecting right dominant side                                                  | 438.21 | 169.951 |
| Hemiplegia affecting right side in right-dominant patient as late effect of cerebrovascular disease                                     | 438.21 | 169.951 |
| Hemiplegia and hemiparesis following unspecified cerebrovascular disease affecting right dominant side                                  | 438.21 | 169.951 |
| Hemiplegia of right dominant side due to cerebrovascular disease, unspecified cerebrovascular disease type, unspecified hemiplegia type | 438.21 | 169.951 |
| Hemiplegia and hemiparesis following unspecified cerebrovascular disease affecting right dominant side                                  |        | 169.951 |
| Hemiplegia following unspecified cerebrovascular disease affecting left dominant side                                                   | 438.21 | 169.952 |
| Hemiplegia affecting left side in left-dominant patient as late effect of cerebrovascular disease                                       | 438.21 | 169.952 |
| Hemiplegia and hemiparesis following unspecified cerebrovascular disease affecting left dominant side                                   | 438.21 | 169.952 |
| Hemiplegia of left dominant side due to cerebrovascular disease, unspecified cerebrovascular disease type, unspecified hemiplegia type  | 438.21 | 169.952 |
| Hemiplegia and hemiparesis following unspecified cerebrovascular disease affecting left dominant side                                   |        | 169.952 |
| Hemiplegia following unspecified cerebrovascular disease affecting right non-dominant side                                              | 438.22 | 169.953 |
| Hemiplegia and hemiparesis following unspecified cerebrovascular disease affecting right non-dominant side                              | 438.22 | 169.953 |

|                                                                                                                                            |        |         |
|--------------------------------------------------------------------------------------------------------------------------------------------|--------|---------|
| Hemiplegia of right nondominant side due to cerebrovascular disease, unspecified cerebrovascular disease type, unspecified hemiplegia type | 438.22 | 169.953 |
| Hemiplegia and hemiparesis following unspecified cerebrovascular disease affecting right non-dominant side                                 |        | 169.953 |
| Hemiplegia following unspecified cerebrovascular disease affecting left nondominant side                                                   | 438.22 | 169.954 |
| Hemiplegia and hemiparesis following unspecified cerebrovascular disease affecting left non-dominant side                                  | 438.22 | 169.954 |
| Hemiplegia of left nondominant side due to cerebrovascular disease, unspecified cerebrovascular disease type, unspecified hemiplegia type  | 438.22 | 169.954 |
| Hemiplegia and hemiparesis following unspecified cerebrovascular disease affecting left non-dominant side                                  |        | 169.954 |
| Hemiplegia affecting unspecified side, late effect of cerebrovascular disease                                                              | 438.2  | 169.959 |
| Hemiplegia affecting dominant side, late effect of cerebrovascular disease                                                                 | 438.21 | 169.959 |
| Hemiplegia affecting nondominant side, late effect of cerebrovascular disease                                                              | 438.22 | 169.959 |
| Hemiplegia of dominant side, late effect of cerebrovascular disease                                                                        | 438.21 | 169.959 |
| Hemiplegia, late effect of cerebrovascular disease                                                                                         | 438.2  | 169.959 |
| Hemiplegia due to cerebrovascular disease, late effect                                                                                     | 438.2  | 169.959 |
| Hemiplegia or hemiparesis as late effect of cerebrovascular disease                                                                        | 438.2  | 169.959 |
| Hemiplegia of dominant side as late effect of cerebrovascular disease                                                                      | 438.21 | 169.959 |
| Hemiplegia of nondominant side, late effect of cerebrovascular disease                                                                     | 438.22 | 169.959 |



|                                                                                                         |        |         |
|---------------------------------------------------------------------------------------------------------|--------|---------|
| Hemiplegia as late effect of cerebrovascular disease                                                    | 438.2  | 169.959 |
| Hemiplegia of nondominant side as late effect of cerebrovascular disease                                | 438.22 | 169.959 |
| Hemiplegia/hemiparesis, late effect of cerebrovascular disease                                          | 438.2  | 169.959 |
| Hemiplegia of dominant side as late effect following cerebrovascular disease                            | 438.21 | 169.959 |
| Hemiplegia and hemiparesis following unspecified cerebrovascular disease affecting unspecified side     | 438.2  | 169.959 |
| Hemiplegia following unsp cerebrovascular disease affecting unspecified side                            | 438.2  | 169.959 |
| Hemiplegia and hemiparesis following unspecified cerebrovascular disease affecting unspecified side     |        | 169.959 |
| Other paralytic syndrome following unspecified cerebrovascular disease                                  |        | 169.96  |
| Other paralytic syndrome following unspecified cerebrovascular disease affecting right dominant side    | 438.51 | 169.961 |
| Other paralytic syndrome following unspecified cerebrovascular disease affecting right dominant side    | 438.51 | 169.961 |
| Other paralytic syndrome following unspecified cerebrovascular disease affecting right dominant side    |        | 169.961 |
| Other paralytic syndrome following unspecified cerebrovascular disease affecting left dominant side     | 438.51 | 169.962 |
| Other paralytic syndrome following unspecified cerebrovascular disease affecting left dominant side     | 438.51 | 169.962 |
| Other paralytic syndrome following unspecified cerebrovascular disease affecting left dominant side     |        | 169.962 |
| Other paralytic syndrome following unspecified cerebrovascular disease affecting right nondominant side | 438.52 | 169.963 |

|                                                                                                          |        |         |
|----------------------------------------------------------------------------------------------------------|--------|---------|
| Other paralytic syndrome following unspecified cerebrovascular disease affecting right non-dominant side | 438.52 | 169.963 |
| Other paralytic syndrome following unspecified cerebrovascular disease affecting right non-dominant side |        | 169.963 |
| Oth parlyt synd fol unsp cerebvasc dis aff left nondom side                                              | 438.52 | 169.964 |
| Other paralytic syndrome following unspecified cerebrovascular disease affecting left non-dominant side  | 438.52 | 169.964 |
| Other paralytic syndrome following unspecified cerebrovascular disease affecting left non-dominant side  |        | 169.964 |
| Other paralytic syndrome, bilateral, late effect of cerebrovascular disease                              | 438.53 | 169.965 |
| Other paralytic syndrome, bilateral, due to cerebrovascular disease                                      | 438.53 | 169.965 |
| Paralytic syndrome, bilateral, due to cerebrovascular disease                                            | 438.53 | 169.965 |
| Bilateral paralytic syndrome as late effect of cerebrovascular disease                                   | 438.53 | 169.965 |
| Other paralytic syndrome following unspecified cerebrovascular disease, bilateral                        | 438.53 | 169.965 |
| Oth paralytic syndrome following unsp cerebvasc disease, bi                                              | 438.53 | 169.965 |
| Other paralytic syndrome following unspecified cerebrovascular disease, bilateral                        |        | 169.965 |
| Other paralytic syndrome affecting unspecified side, late effect of cerebrovascular disease              | 438.5  | 169.969 |
| Other paralytic syndrome affecting dominant side, late effect of cerebrovascular disease                 | 438.51 | 169.969 |

|                                                                                                   |        |         |
|---------------------------------------------------------------------------------------------------|--------|---------|
| Other paralytic syndrome affecting nondominant side, late effect of cerebrovascular disease       | 438.52 | 169.969 |
| Paralytic syndrome, late effect of cerebrovascular disease                                        | 438.5  | 169.969 |
| Paralytic syndrome affecting side                                                                 | 438.5  | 169.969 |
| Paralytic syndrome affecting dominant side, late effect of cerebrovascular disease                | 438.51 | 169.969 |
| Paralytic syndrome affecting nondominant side, late effect of cerebrovascular disease             | 438.52 | 169.969 |
| Other paralytic syndrome, late effect of cerebrovascular disease                                  | 438.5  | 169.969 |
| Paralytic syndrome of nondominant side as late effect of cerebrovascular disease                  | 438.52 | 169.969 |
| Paralytic syndrome affecting dominant side as late effect of cerebrovascular disease              | 438.51 | 169.969 |
| Paralytic syndrome as late effect of cerebrovascular disease                                      | 438.5  | 169.969 |
| Other paralytic syndrome following cerebrovascular disease                                        | 438.5  | 169.969 |
| Other paralytic syndrome following unspecified cerebrovascular disease affecting unspecified side | 438.5  | 169.969 |
| Oth parlyt syndrome fol unsp cerebvasc disease aff unsp side                                      | 438.5  | 169.969 |
| Other paralytic syndrome following unspecified cerebrovascular disease affecting unspecified side |        | 169.969 |
| Other sequelae of unspecified cerebrovascular disease                                             |        | 169.99  |
| Apraxia, late effect of cerebrovascular disease                                                   | 438.81 | 169.990 |
| Apraxia following cerebrovascular disease                                                         | 438.81 | 169.990 |
| Apraxia as late effect of cerebrovascular disease                                                 | 438.81 | 169.990 |

|                                                               |        |         |
|---------------------------------------------------------------|--------|---------|
| Apraxia following unspecified cerebrovascular disease         | 438.81 | 169.990 |
| Apraxia following unspecified cerebrovascular disease         |        | 169.990 |
| Dysphagia, late effect of cerebrovascular disease             | 438.82 | 169.991 |
| Dysphagia following cerebrovascular disease                   | 438.82 | 169.991 |
| Dysphagia as late effect of cerebrovascular disease           | 438.82 | 169.991 |
| Dysphagia following unspecified cerebrovascular disease       | 438.82 | 169.991 |
| Dysphagia following unspecified cerebrovascular disease       |        | 169.991 |
| Facial weakness due to cerebrovascular disease(438.83)        | 438.83 | 169.992 |
| Facial weakness following cerebrovascular disease             | 438.83 | 169.992 |
| Facial weakness following unspecified cerebrovascular disease | 438.83 | 169.992 |
| Facial weakness following unspecified cerebrovascular disease |        | 169.992 |
| Ataxia, late effect of cerebrovascular disease                | 438.84 | 169.993 |
| Ataxia S/P CVA                                                | 438.84 | 169.993 |
| CVA, old, ataxia                                              | 438.84 | 169.993 |
| Ataxia following cerebrovascular disease                      | 438.84 | 169.993 |
| Ataxia following unspecified cerebrovascular disease          | 438.84 | 169.993 |
| Ataxia following unspecified cerebrovascular disease          |        | 169.993 |
| Other late effects of cerebrovascular disease(438.89)         | 438.89 | 169.998 |
| Other late effects of cerebrovascular disease                 | 438.89 | 169.998 |
| Other sequelae following unspecified cerebrovascular disease  | 438.89 | 169.998 |

|                                                                          |        |                |
|--------------------------------------------------------------------------|--------|----------------|
| Other sequelae following unspecified cerebrovascular disease             |        | 169.998        |
| Disturbances of vision, late effect of cerebrovascular disease           | 438.7  | 169.998, H53.9 |
| Vision disturbance, late effect of cerebrovascular disease               | 438.7  | 169.998, H53.9 |
| Abnormal vision as late effect of cerebrovascular disease                | 438.7  | 169.998, H53.9 |
| Alterations of sensations, late effect of cerebrovascular disease(438.6) | 438.6  | 169.998, R20.9 |
| Sensation alteration, late effect of cerebrovascular disease             | 438.6  | 169.998, R20.9 |
| Alterations of sensations, late effect of cerebrovascular disease        | 438.6  | 169.998, R20.9 |
| Vertigo, late effect of cerebrovascular disease                          | 438.85 | 169.998, R42   |
| Atherosclerosis                                                          |        | 170            |
| Atherosclerosis of aorta                                                 | 440    | 170.0          |
| Aortic atherosclerosis                                                   | 440    | 170.0          |
| Hardening of the aorta (main artery of the heart)                        | 440    | 170.0          |
| Intra-aortic calcification                                               | 440    | 170.0          |
| Intraaortic calcification                                                | 440    | 170.0          |
| Thoracic aortic atherosclerosis                                          | 440    | 170.0          |
| Thoracic aorta atherosclerosis                                           | 440    | 170.0          |
| Abdominal aortic atherosclerosis                                         | 440    | 170.0          |
| Atherosclerosis of abdominal aorta                                       | 440    | 170.0          |
| Atherosclerosis of aortic arch                                           | 440    | 170.0          |
| Aortic arch atherosclerosis                                              | 440    | 170.0          |
| Aortoiliac stenosis                                                      | 440    | 170.0          |
| Left aortoiliac stenosis                                                 | 440    | 170.0          |
| Aortoiliac stenosis, left                                                | 440    | 170.0          |
| Aortoiliac stenosis, right                                               | 440    | 170.0          |
| Right aortoiliac stenosis                                                | 440    | 170.0          |
| Calcification of aorta                                                   | 440    | 170.0          |
| Aortic calcification                                                     | 440    | 170.0          |
| Mild aortic sclerosis                                                    | 440    | 170.0          |

|                                                                 |               |                |
|-----------------------------------------------------------------|---------------|----------------|
| Stenosis of infrarenal abdominal aorta due to arteriosclerosis  | 440           | 170.0          |
| Stenosis of infrarenal abdominal aorta due to atherosclerosis   | 440           | 170.0          |
| Arteriosclerosis of abdominal aorta                             | 440           | 170.0          |
| Arteriosclerosis of aorta                                       | 440           | 170.0          |
| Arteriosclerosis of thoracic aorta                              | 440           | 170.0          |
| Non-rheumatic aortic sclerosis                                  | 440           | 170.0          |
| Atherosclerotic ulcer of aorta                                  | 440           | 170.0          |
| Penetrating atherosclerotic ulcer of aorta                      | 440           | 170.0          |
| Atherosclerosis of aorta without gangrene                       | 440           | 170.0          |
| Calcification of abdominal aorta                                | 440           | 170.0          |
| Medial degeneration of aorta determined by biopsy               | 440           | 170.0          |
| Atherosclerosis of aorta                                        |               | 170.0          |
| Aorto-iliac atherosclerosis                                     | 440.0, 440.20 | 170.0, 170.299 |
| Atherosclerosis of aortic bifurcation and common iliac arteries | 440.0, 440.8  | 170.0, 170.8   |
| Shaggy aorta syndrome                                           | 440.0, 444.9  | 170.0, 174.9   |
| Atherosclerosis of aorta with gangrene                          | 440.0, 785.4  | 170.0, 196     |
| Atherosclerosis of renal artery                                 | 440.1         | 170.1          |
| Goldblatt hypertension                                          | 440.1         | 170.1          |
| Goldblatt's, hypertension                                       | 440.1         | 170.1          |
| Hypertension, Goldblatt                                         | 440.1         | 170.1          |
| Renal artery arteriosclerosis                                   | 440.1         | 170.1          |
| Renal artery atheroma                                           | 440.1         | 170.1          |
| Renal artery atherosclerosis                                    | 440.1         | 170.1          |
| Renal artery stenosis of unknown cause                          | 440.1         | 170.1          |
| Kidney artery constriction                                      | 593.81        | 170.1          |
| Renal artery stenosis                                           | 440.1         | 170.1          |
| RAS (renal artery stenosis)                                     | 440.1         | 170.1          |
| Atherosclerotic renal artery stenosis                           | 440.1         | 170.1          |
| Unilateral atherosclerotic renal artery stenosis                | 440.1         | 170.1          |
| Atherosclerotic renal artery stenosis, unilateral               | 440.1         | 170.1          |

|                                                                 |              |            |
|-----------------------------------------------------------------|--------------|------------|
| Atherosclerotic RAS (renal artery stenosis), unilateral         | 440.1        | I70.1      |
| Renal artery atherosclerosis, unilateral                        | 440.1        | I70.1      |
| Bilateral atherosclerotic renal artery stenosis                 | 440.1        | I70.1      |
| Bilateral renal artery stenosis                                 | 440.1        | I70.1      |
| Atherosclerotic renal artery stenosis, bilateral                | 440.1        | I70.1      |
| Renal artery atherosclerosis, bilateral                         | 440.1        | I70.1      |
| Atherosclerotic RAS (renal artery stenosis), bilateral          | 440.1        | I70.1      |
| Non-flow-limiting renal artery stenosis                         | 440.1        | I70.1      |
| Renal artery stenosis, non-flow-limiting                        | 440.1        | I70.1      |
| Native stenosis of both renal arteries                          | 440.1        | I70.1      |
| Renal artery stenosis, native, bilateral                        | 440.1        | I70.1      |
| Native stenosis of renal artery                                 | 440.1        | I70.1      |
| Renal artery stenosis, native                                   | 440.1        | I70.1      |
| Stenosis of one of two renal arteries                           | 440.1        | I70.1      |
| Renal artery stenosis in 1 of 2 vessels                         | 440.1        | I70.1      |
| Stenosis of renal artery involving single vessel                | 440.1        | I70.1      |
| Left renal artery stenosis                                      | 440.1        | I70.1      |
| Right renal artery stenosis                                     | 440.1        | I70.1      |
| Stenosis of right renal artery                                  | 440.1        | I70.1      |
| Ischemic nephropathy with atherosclerotic renal artery stenosis | 440.1        | I70.1      |
| Stenosis of both renal arteries                                 | 440.1        | I70.1      |
| Acquired renal artery stenosis                                  | 440.1        | I70.1      |
| Atherosclerosis of renal artery without gangrene                | 440.1        | I70.1      |
| Atherosclerosis of renal artery                                 |              | I70.1      |
| Atherosclerosis of renal artery with gangrene                   | 440.1, 785.4 | I70.1, I96 |
| Atherosclerosis of native arteries of the extremities           |              | I70.2      |
| Unspecified atherosclerosis of native arteries of extremities   |              | I70.20     |

|                                                                                                                |        |         |
|----------------------------------------------------------------------------------------------------------------|--------|---------|
| Stenosis of right peroneal artery                                                                              | 440.29 | 170.201 |
| Peroneal artery stenosis, right                                                                                | 440.29 | 170.201 |
| Stenosis of right popliteal artery                                                                             | 440.2  | 170.201 |
| Popliteal artery stenosis, right                                                                               | 440.2  | 170.201 |
| Stenosis of right femoral artery                                                                               | 440.2  | 170.201 |
| Femoral artery stenosis, right                                                                                 | 440.2  | 170.201 |
| Stenosis of right tibial artery                                                                                | 440.2  | 170.201 |
| Tibial artery stenosis, right                                                                                  | 440.2  | 170.201 |
| Stenosis of right popliteal-tibial artery                                                                      | 440.2  | 170.201 |
| Tibial popliteal stenosis, right                                                                               | 440.2  | 170.201 |
| Atherosclerosis of native artery of right lower extremity                                                      | 440.2  | 170.201 |
| Atherosclerosis of right leg                                                                                   | 440.2  | 170.201 |
| Atherosclerosis of artery of right lower extremity                                                             | 440.2  | 170.201 |
| Atherosclerosis of right lower extremity                                                                       | 440.2  | 170.201 |
| Unspecified atherosclerosis of native arteries of extremities, right leg                                       | 440.2  | 170.201 |
| Atherosclerosis of native artery of right lower extremity, with unspecified presence of clinical manifestation | 440.2  | 170.201 |
| Unsp athscl native arteries of extremities, right leg                                                          | 440.2  | 170.201 |
| Unspecified atherosclerosis of native arteries of extremities, right leg                                       |        | 170.201 |
| Stenosis of left peroneal artery                                                                               | 440.29 | 170.202 |
| Peroneal artery stenosis, left                                                                                 | 440.29 | 170.202 |
| Stenosis of left popliteal artery                                                                              | 440.2  | 170.202 |
| Popliteal artery stenosis, left                                                                                | 440.2  | 170.202 |
| Femoral artery stenosis, left                                                                                  | 440.2  | 170.202 |
| Stenosis of left femoral artery                                                                                | 440.2  | 170.202 |
| Stenosis of left tibial artery                                                                                 | 440.2  | 170.202 |
| Tibial artery stenosis, left                                                                                   | 440.2  | 170.202 |
| Stenosis of left popliteal-tibial artery                                                                       | 440.2  | 170.202 |
| Tibial popliteal stenosis, left                                                                                | 440.2  | 170.202 |
| Atherosclerosis of native artery of left lower extremity                                                       | 440.2  | 170.202 |



|                                                                                                                 |        |         |
|-----------------------------------------------------------------------------------------------------------------|--------|---------|
| Atherosclerosis of left leg                                                                                     | 440.2  | 170.202 |
| Atherosclerosis of artery of left lower extremity                                                               | 440.2  | 170.202 |
| Atherosclerosis of left lower extremity                                                                         | 440.2  | 170.202 |
| Unspecified atherosclerosis of native arteries of extremities, left leg                                         | 440.2  | 170.202 |
| Atherosclerosis of native artery of left lower extremity, with unspecified presence of clinical manifestation   | 440.2  | 170.202 |
| Unsp athscl native arteries of extremities, left leg                                                            | 440.2  | 170.202 |
| Unspecified atherosclerosis of native arteries of extremities, left leg                                         |        | 170.202 |
| Bilateral femoral artery stenosis                                                                               | 440.2  | 170.203 |
| Bilateral peroneal artery stenosis                                                                              | 440.29 | 170.203 |
| Peroneal artery stenosis, bilateral                                                                             | 440.29 | 170.203 |
| Narrowing of peroneal artery in both legs                                                                       | 440.29 | 170.203 |
| Atherosclerosis of native artery of both lower extremities                                                      | 440.2  | 170.203 |
| Atherosclerosis of artery of both lower extremities                                                             | 440.2  | 170.203 |
| Bilateral atherosclerosis of legs                                                                               | 440.2  | 170.203 |
| Atherosclerosis of both lower extremities                                                                       | 440.2  | 170.203 |
| Unspecified atherosclerosis of native arteries of extremities, bilateral legs                                   | 440.2  | 170.203 |
| Atherosclerosis of native artery of both lower extremities, with unspecified presence of clinical manifestation | 440.2  | 170.203 |
| Unsp athscl native arteries of extremities, bilateral legs                                                      | 440.2  | 170.203 |
| Unspecified atherosclerosis of native arteries of extremities, bilateral legs                                   |        | 170.203 |
| Ulnar artery stenosis                                                                                           | 440.2  | 170.208 |
| Stenosis of ulnar artery                                                                                        | 440.2  | 170.208 |
| Stenosis of left brachial artery                                                                                | 440.2  | 170.208 |
| Brachial artery stenosis, left                                                                                  | 440.2  | 170.208 |
| Stenosis of right brachial artery                                                                               | 440.2  | 170.208 |

|                                                                                                          |       |         |
|----------------------------------------------------------------------------------------------------------|-------|---------|
| Brachial artery stenosis, right                                                                          | 440.2 | 170.208 |
| Stenosis of artery of upper extremity                                                                    | 440.2 | 170.208 |
| Atherosclerosis of native artery of other extremity                                                      | 440.2 | 170.208 |
| Unspecified atherosclerosis of native arteries of extremities, other extremity                           | 440.2 | 170.208 |
| Atherosclerosis of other extremity                                                                       | 440.2 | 170.208 |
| Atherosclerosis of native artery of other extremity, with unspecified presence of clinical manifestation | 440.2 | 170.208 |
| Unsp athscl native arteries of extremities, oth extremity                                                | 440.2 | 170.208 |
| Unspecified atherosclerosis of native arteries of extremities, other extremity                           |       | 170.208 |
| Atherosclerosis of native arteries of the extremities, unspecified                                       | 440.2 | 170.209 |
| Monckeberg's medial sclerosis                                                                            | 440.2 | 170.209 |
| Monckeberg's medial calcinosis                                                                           | 440.2 | 170.209 |
| Peripheral arteriosclerosis                                                                              | 440.2 | 170.209 |
| Atherosclerosis of arteries of extremities                                                               | 440.2 | 170.209 |
| Femoral-popliteal artery atherosclerosis                                                                 | 440.2 | 170.209 |
| Stenosis of femoral artery                                                                               | 440.2 | 170.209 |
| Femoral artery stenosis                                                                                  | 440.2 | 170.209 |
| Stenosis of popliteal artery                                                                             | 440.2 | 170.209 |
| Stenosis of lower extremity artery                                                                       | 440.2 | 170.209 |
| Stenosis of tibial artery                                                                                | 440.2 | 170.209 |
| Tibial artery stenosis                                                                                   | 440.2 | 170.209 |
| Arteriosclerosis of arteries of extremities                                                              | 440.2 | 170.209 |
| Stenosis of popliteal-tibial artery                                                                      | 440.2 | 170.209 |
| Tibial popliteal stenosis                                                                                | 440.2 | 170.209 |
| Popliteal artery stenosis                                                                                | 440.2 | 170.209 |
| Atherosclerosis of native artery of extremity                                                            | 440.2 | 170.209 |
| Atherosclerotic peripheral vascular disease                                                              | 440.2 | 170.209 |
| Femoral-popliteal atherosclerosis                                                                        | 440.2 | 170.209 |

|                                                                                                                                  |       |         |
|----------------------------------------------------------------------------------------------------------------------------------|-------|---------|
| Other atherosclerotic peripheral vascular disease                                                                                | 440.2 | 170.209 |
| Occlusion of artery of lower extremity due to arteriosclerosis                                                                   | 440.2 | 170.209 |
| Atherosclerosis of native arteries of the extremities                                                                            | 440.2 | 170.209 |
| Arteriosclerosis of artery of extremity                                                                                          | 440.2 | 170.209 |
| Occlusive disease of artery of upper extremity                                                                                   | 440.2 | 170.209 |
| Occlusive disease of artery of lower extremity                                                                                   | 440.2 | 170.209 |
| Atheroma of artery of extremity                                                                                                  | 440.2 | 170.209 |
| Occlusion of artery of extremity                                                                                                 | 440.2 | 170.209 |
| Atherosclerosis of artery of extremity without gangrene                                                                          | 440.2 | 170.209 |
| Atherosclerotic peripheral vascular disease of extremity                                                                         | 440.2 | 170.209 |
| Atherosclerosis of lower extremity                                                                                               | 440.2 | 170.209 |
| Atherosclerosis of native artery of lower extremity                                                                              | 440.2 | 170.209 |
| Unspecified atherosclerosis of native arteries of extremities, unspecified extremity                                             | 440.2 | 170.209 |
| Atherosclerosis of native artery of lower extremity, unspecified laterality, with unspecified presence of clinical manifestation | 440.2 | 170.209 |
| Atherosclerosis of native artery of extremity, unspecified extremity, with unspecified presence of clinical manifestation        | 440.2 | 170.209 |
| Unsp athscl native arteries of extremities, unsp extremity                                                                       | 440.2 | 170.209 |
| Unspecified atherosclerosis of native arteries of extremities, unspecified extremity                                             |       | 170.209 |

|                                                                                             |               |                  |
|---------------------------------------------------------------------------------------------|---------------|------------------|
| Atherosclerotic peripheral vascular disease with ulceration                                 | 440.23, 707.9 | I70.209, L98.499 |
| Atherosclerotic PVD with ulceration                                                         | 440.23, 707.9 | I70.209, L98.499 |
| Atherosclerosis of extremity with ulceration                                                | 440.23, 707.9 | I70.209, L98.499 |
| Atherosclerosis of native arteries of extremities with intermittent claudication            |               | I70.21           |
| Atheroscler of native artery of right leg with intermit claudication                        | 440.21        | I70.211          |
| Atherosclerosis of native artery of right lower extremity with intermittent claudication    | 440.21        | I70.211          |
| Atherosclerosis of right lower extremity with intermittent claudication                     | 440.21        | I70.211          |
| Atherosclerosis of native arteries of extremities with intermittent claudication, right leg | 440.21        | I70.211          |
| Intermittent claudication of right lower extremity due to atherosclerosis                   | 440.21        | I70.211          |
| Athscl native arteries of extrm w intrmt claud, right leg                                   | 440.21        | I70.211          |
| Atherosclerosis of native arteries of extremities with intermittent claudication, right leg |               | I70.211          |
| Atheroscler of native artery of left leg with intermit claudication                         | 440.21        | I70.212          |
| Atherosclerosis of native artery of left lower extremity with intermittent claudication     | 440.21        | I70.212          |
| Atherosclerosis of left lower extremity with intermittent claudication                      | 440.21        | I70.212          |
| Atherosclerosis of native arteries of extremities with intermittent claudication, left leg  | 440.21        | I70.212          |
| Intermittent claudication of left lower extremity due to atherosclerosis                    | 440.21        | I70.212          |

|                                                                                                   |        |         |
|---------------------------------------------------------------------------------------------------|--------|---------|
| Athscl native arteries of extrm w intrmt claud, left leg                                          | 440.21 | I70.212 |
| Atherosclerosis of native arteries of extremities with intermittent claudication, left leg        |        | I70.212 |
| Atheroscler of native artery of both legs with intermit claudication                              | 440.21 | I70.213 |
| Atherosclerosis of native artery of both lower extremities with intermittent claudication         | 440.21 | I70.213 |
| Atherosclerosis of both lower extremities with intermittent claudication                          | 440.21 | I70.213 |
| Atherosclerosis of native arteries of extremities with intermittent claudication, bilateral legs  | 440.21 | I70.213 |
| Intermittent claudication of both lower extremities due to atherosclerosis                        | 440.21 | I70.213 |
| Athscl native arteries of extrm w intrmt claud, bi legs                                           | 440.21 | I70.213 |
| Atherosclerosis of native arteries of extremities with intermittent claudication, bilateral legs  |        | I70.213 |
| Athscl native arteries of extrm w intrmt claud, oth extrm                                         | 440.21 | I70.218 |
| Atherosclerosis of native artery of other extremity with intermittent claudication                | 440.21 | I70.218 |
| Atherosclerosis of native arteries of extremities with intermittent claudication, other extremity | 440.21 | I70.218 |
| Atherosclerosis of other extremity with intermittent claudication                                 | 440.21 | I70.218 |
| Atherosclerosis of native arteries of extremities with intermittent claudication, other extremity |        | I70.218 |
| Atherosclerosis of native arteries of the extremities with intermittent claudication              | 440.21 | I70.219 |

|                                                                                                            |        |         |
|------------------------------------------------------------------------------------------------------------|--------|---------|
| Extremity atherosclerosis with intermittent claudication                                                   | 440.21 | 170.219 |
| Atherosclerotic femoro-popliteal artery disease with claudication                                          | 440.21 | 170.219 |
| Atherosclerosis of leg with intermittent claudication                                                      | 440.21 | 170.219 |
| Atherosclerotic PVD with intermittent claudication                                                         | 440.21 | 170.219 |
| Atheroscler native arteries the extremities w/intermit claudication                                        | 440.21 | 170.219 |
| Atherosclerotic peripheral vascular disease with intermittent claudication                                 | 440.21 | 170.219 |
| Atherosclerosis of native arteries of extremity with intermittent claudication                             | 440.21 | 170.219 |
| Atherosclerosis of lower extremity with claudication                                                       | 440.21 | 170.219 |
| Atherosclerosis of artery of extremity with intermittent claudication                                      | 440.21 | 170.219 |
| Atherosclerosis of lower extremity with intermittent claudication                                          | 440.21 | 170.219 |
| Atherosclerosis with limb claudication                                                                     | 440.21 | 170.219 |
| Atherosclerosis with claudication of extremity                                                             | 440.21 | 170.219 |
| Atheroscler-limb&claudic                                                                                   | 440.21 | 170.219 |
| Atherosclerosis of native artery of extremity with intermittent claudication                               | 440.21 | 170.219 |
| Atherosclerosis of native artery of lower extremity with intermittent claudication                         | 440.21 | 170.219 |
| Atherosclerosis of extremity with intermittent claudication                                                | 440.21 | 170.219 |
| Atherosclerosis of native arteries of extremities with intermittent claudication, unspecified extremity    | 440.21 | 170.219 |
| Atherosclerosis of native artery of lower extremity with intermittent claudication, unspecified laterality | 440.21 | 170.219 |

|                                                                                                         |        |         |
|---------------------------------------------------------------------------------------------------------|--------|---------|
| Atherosclerosis of native artery of extremity with intermittent claudication, unspecified extremity     | 440.21 | I70.219 |
| Athscl native arteries of extrm w intrmt claud, unsp extrm                                              | 440.21 | I70.219 |
| Atherosclerosis of native arteries of extremities with intermittent claudication, unspecified extremity |        | I70.219 |
| Atherosclerosis of native arteries of extremities with rest pain                                        |        | I70.22  |
| Atherosclerosis of native artery of right leg with rest pain                                            | 440.22 | I70.221 |
| Atherosclerosis of native artery of right lower extremity with rest pain                                | 440.22 | I70.221 |
| Atherosclerosis of right lower extremity with rest pain                                                 | 440.22 | I70.221 |
| Atherosclerosis of native arteries of extremities with rest pain, right leg                             | 440.22 | I70.221 |
| Athscl native arteries of extremities w rest pain, right leg                                            | 440.22 | I70.221 |
| Atherosclerosis of native arteries of extremities with rest pain, right leg                             |        | I70.221 |
| Atherosclerosis of native artery of left leg with rest pain                                             | 440.22 | I70.222 |
| Atherosclerosis of native artery of left lower extremity with rest pain                                 | 440.22 | I70.222 |
| Atherosclerosis of left lower extremity with rest pain                                                  | 440.22 | I70.222 |
| Atherosclerosis of native arteries of extremities with rest pain, left leg                              | 440.22 | I70.222 |
| Athscl native arteries of extremities w rest pain, left leg                                             | 440.22 | I70.222 |
| Atherosclerosis of native arteries of extremities with rest pain, left leg                              |        | I70.222 |
| Atherosclerosis of native artery of both legs with rest pain                                            | 440.22 | I70.223 |

|                                                                                   |        |         |
|-----------------------------------------------------------------------------------|--------|---------|
| Atherosclerosis of native artery of both lower extremities with rest pain         | 440.22 | 170.223 |
| Atherosclerosis of both lower extremities with rest pain                          | 440.22 | 170.223 |
| Atherosclerosis of native arteries of extremities with rest pain, bilateral legs  | 440.22 | 170.223 |
| Athscl native arteries of extrm w rest pain, bilateral legs                       | 440.22 | 170.223 |
| Atherosclerosis of native arteries of extremities with rest pain, bilateral legs  |        | 170.223 |
| Athscl native arteries of extrm w rest pain, oth extremity                        | 440.22 | 170.228 |
| Atherosclerosis of native artery of other extremity with rest pain                | 440.22 | 170.228 |
| Atherosclerosis of native arteries of extremities with rest pain, other extremity | 440.22 | 170.228 |
| Atherosclerosis of other extremity with rest pain                                 | 440.22 | 170.228 |
| Atherosclerosis of native arteries of extremities with rest pain, other extremity |        | 170.228 |
| Atherosclerosis of native arteries of the extremities with rest pain              | 440.22 | 170.229 |
| Extremity atherosclerosis with resting pain                                       | 440.22 | 170.229 |
| Atherosclerotic femoro-popliteal artery disease with rest pain                    | 440.22 | 170.229 |
| Atherosclerotic peripheral vascular disease with rest pain                        | 440.22 | 170.229 |
| Atherosclerosis of native arteries of extremity with rest pain                    | 440.22 | 170.229 |
| Atherosclerosis of artery of extremity with rest pain                             | 440.22 | 170.229 |
| Atherosclerosis of native artery of extremity with rest pain                      | 440.22 | 170.229 |
| Atherosclerosis of native artery of lower extremity with rest pain                | 440.22 | 170.229 |



|                                                                                                |                |                  |
|------------------------------------------------------------------------------------------------|----------------|------------------|
| Atherosclerosis of lower extremity with rest pain                                              | 440.22         | I70.229          |
| Atherosclerosis of extremity with rest pain                                                    | 440.22         | I70.229          |
| Atherosclerosis of native arteries of extremities with rest pain, unspecified extremity        | 440.22         | I70.229          |
| Atherosclerosis of native artery of lower extremity with rest pain, unspecified laterality     | 440.22         | I70.229          |
| Atherosclerosis of native artery of extremity with rest pain, unspecified extremity            | 440.22         | I70.229          |
| Athscl native arteries of extrm w rest pain, unsp extremity                                    | 440.22         | I70.229          |
| Atherosclerosis of native arteries of extremities with rest pain, unspecified extremity        |                | I70.229          |
| Atherosclerosis of native arteries of right leg with ulceration                                |                | I70.23           |
| Atherosclerosis of native artery of right leg with ulceration of thigh                         | 440.23, 707.11 | I70.231          |
| Atherosclerosis of native artery of right lower extremity with ulceration of thigh             | 440.23, 707.11 | I70.231          |
| Atherosclerosis of right lower extremity with ulceration of thigh                              | 440.23, 707.11 | I70.231          |
| Atherosclerosis of native arteries of right leg with ulceration of thigh                       | 440.23, 707.11 | I70.231          |
| Athscl native arteries of right leg w ulceration of thigh                                      | 440.23, 707.11 | I70.231          |
| Atherosclerosis of native arteries of right leg with ulceration of thigh                       |                | I70.231          |
| Atherosclerosis of native artery of both lower extremities with bilateral ulceration of thighs | 440.23, 707.11 | I70.231, I70.241 |
| Atherosclerosis of both lower extremities with bilateral ulceration of thighs                  | 440.23, 707.11 | I70.231, I70.241 |

|                                                                                                |                |                  |
|------------------------------------------------------------------------------------------------|----------------|------------------|
| Atherosclerosis of native artery of right leg with ulceration of calf                          | 440.23, 707.12 | 170.232          |
| Atherosclerosis of native artery of right lower extremity with ulceration of calf              | 440.23, 707.12 | 170.232          |
| Atherosclerosis of right lower extremity with ulceration of calf                               | 440.23, 707.12 | 170.232          |
| Atherosclerosis of native arteries of right leg with ulceration of calf                        | 440.23, 707.12 | 170.232          |
| Athscl native arteries of right leg w ulceration of calf                                       | 440.23, 707.12 | 170.232          |
| Atherosclerosis of native arteries of right leg with ulceration of calf                        |                | 170.232          |
| Atherosclerosis of native artery of both lower extremities with bilateral ulceration of calf   | 440.23, 707.12 | 170.232, 170.242 |
| Atherosclerosis of native artery of both lower extremities with bilateral ulceration of calves | 440.23, 707.12 | 170.232, 170.242 |
| Atherosclerosis of both lower extremities with bilateral ulceration of calves                  | 440.23, 707.12 | 170.232, 170.242 |
| Atherosclerosis of native artery of right leg with ulceration of ankle                         | 440.23, 707.13 | 170.233          |
| Atherosclerosis of native artery of right lower extremity with ulceration of ankle             | 440.23, 707.13 | 170.233          |
| Atherosclerosis of right lower extremity with ulceration of ankle                              | 440.23, 707.13 | 170.233          |
| Atherosclerosis of native arteries of right leg with ulceration of ankle                       | 440.23, 707.13 | 170.233          |
| Athscl native arteries of right leg w ulceration of ankle                                      | 440.23, 707.13 | 170.233          |
| Atherosclerosis of native arteries of right leg with ulceration of ankle                       |                | 170.233          |
| Atherosclerosis of native artery of both lower extremities with bilateral ulceration of ankles | 440.23, 707.13 | 170.233, 170.243 |
| Atherosclerosis of both lower extremities with bilateral ulceration of ankles                  | 440.23, 707.13 | 170.233, 170.243 |

|                                                                                                 |                |                  |
|-------------------------------------------------------------------------------------------------|----------------|------------------|
| Athscl native art of right leg w ulcer of heel and midfoot                                      | 440.23, 707.9  | 170.234          |
| Atherosclerosis of right lower extremity with ulceration of heel                                | 440.23, 707.14 | 170.234          |
| Atherosclerosis of right lower extremity with ulceration of midfoot                             | 440.23, 707.14 | 170.234          |
| Atherosclerosis of native artery of right lower extremity with ulceration of heel               | 440.23, 707.14 | 170.234          |
| Atherosclerosis of native artery of right lower extremity with ulceration of midfoot            | 440.23, 707.14 | 170.234          |
| Atherosclerosis of native arteries of right leg with ulceration of heel and midfoot             | 440.23, 707.9  | 170.234          |
| Atherosclerosis of native arteries of right leg with ulceration of heel and midfoot             |                | 170.234          |
| Atherosclerosis of native artery of both lower extremities with bilateral ulceration of midfeet | 440.23, 707.14 | 170.234, 170.244 |
| Atherosclerosis of both lower extremities with bilateral ulceration of midfeet                  | 440.23, 707.14 | 170.234, 170.244 |
| Atherosclerosis of native artery of both lower extremities with bilateral ulceration of heels   | 440.23, 707.14 | 170.234, 170.244 |
| Atherosclerosis of both lower extremities with bilateral ulceration of heels                    | 440.23, 707.14 | 170.234, 170.244 |
| Athscl native arteries of right leg w ulcer oth prt foot                                        | 440.23, 707.9  | 170.235          |
| Atherosclerosis of native artery of right lower extremity with ulceration of other part of foot | 440.23, 707.9  | 170.235          |
| Atherosclerosis of native arteries of right leg with ulceration of other part of foot           | 440.23, 707.9  | 170.235          |
| Atherosclerosis of right lower extremity with ulceration of other part of foot                  | 440.23, 707.15 | 170.235          |
| Atherosclerosis of native arteries of right leg with ulceration of other part of foot           |                | 170.235          |

|                                                                                                                  |                |                  |
|------------------------------------------------------------------------------------------------------------------|----------------|------------------|
| Atherosclerosis of native artery of both lower extremities with bilateral ulceration of other part of feet       | 440.23, 707.15 | 170.235, 170.245 |
| Atherosclerosis of both lower extremities with bilateral ulceration of other part of feet                        | 440.23, 707.15 | 170.235, 170.245 |
| Atherosclerosis of native artery of right lower extremity with ulceration of other part of lower leg             | 440.23, 707.9  | 170.238          |
| Atherosclerosis of native artery of right lower extremity with ulceration of other part of lower leg             | 440.23, 707.9  | 170.238          |
| Atherosclerosis of native arteries of right lower extremity with ulceration of other part of lower leg           | 440.23, 707.9  | 170.238          |
| Atherosclerosis of right lower extremity with ulceration of other part of lower leg                              | 440.23, 707.19 | 170.238          |
| Atherosclerosis of native arteries of right lower extremity with ulceration of other part of lower leg           |                | 170.238          |
| Atherosclerosis of both lower extremities with bilateral ulceration of other part of lower legs                  | 440.23, 707.19 | 170.238, 170.248 |
| Atherosclerosis of native artery of both lower extremities with bilateral ulceration of other part of lower legs | 440.23, 707.19 | 170.238, 170.248 |
| Atherosclerosis of native artery of right lower extremity with ulceration                                        | 440.23, 707.9  | 170.239          |
| Atherosclerosis of native artery of right lower extremity with ulceration                                        | 440.23, 707.9  | 170.239          |
| Atherosclerosis of right lower extremity with ulceration                                                         | 440.23, 707.10 | 170.239          |
| Atherosclerosis of native arteries of right lower extremity with ulceration of unspecified site                  | 440.23, 707.9  | 170.239          |
| Atherosclerosis of native artery of right lower extremity with ulceration, unspecified ulceration site           | 440.23, 707.9  | 170.239          |

|                                                                                                                   |                |                  |
|-------------------------------------------------------------------------------------------------------------------|----------------|------------------|
| Athscl native arteries of right leg w ulcer of unsp site                                                          | 440.23, 707.9  | 170.239          |
| Atherosclerosis of native arteries of right leg with ulceration of unspecified site                               |                | 170.239          |
| Atherosclerosis of both lower extremities with bilateral ulceration                                               | 440.23, 707.10 | 170.239, 170.249 |
| Atherosclerosis of native artery of both lower extremities with bilateral ulceration                              | 440.23, 707.10 | 170.239, 170.249 |
| Atherosclerosis of native artery of both lower extremities with bilateral ulceration, unspecified ulceration site | 440.23, 707.10 | 170.239, 170.249 |
| Atherosclerosis of native arteries of left leg with ulceration                                                    |                | 170.24           |
| Atherosclerosis of native artery of left leg with ulceration of thigh                                             | 440.23, 707.11 | 170.241          |
| Atherosclerosis of native artery of left lower extremity with ulceration of thigh                                 | 440.23, 707.11 | 170.241          |
| Atherosclerosis of left lower extremity with ulceration of thigh                                                  | 440.23, 707.11 | 170.241          |
| Atherosclerosis of native arteries of left leg with ulceration of thigh                                           | 440.23, 707.11 | 170.241          |
| Athscl native arteries of left leg w ulceration of thigh                                                          | 440.23, 707.11 | 170.241          |
| Atherosclerosis of native arteries of left leg with ulceration of thigh                                           |                | 170.241          |
| Atherosclerosis of native artery of left leg with ulceration of calf                                              | 440.23, 707.12 | 170.242          |
| Atherosclerosis of native artery of left lower extremity with ulceration of calf                                  | 440.23, 707.12 | 170.242          |
| Atherosclerosis of left lower extremity with ulceration of calf                                                   | 440.23, 707.12 | 170.242          |
| Atherosclerosis of native arteries of left leg with ulceration of calf                                            | 440.23, 707.12 | 170.242          |
| Atherosclerosis of native arteries of left leg with ulceration of calf                                            |                | 170.242          |
| Atherosclerosis of native artery of left leg with ulceration of ankle                                             | 440.23, 707.13 | 170.243          |

|                                                                                                |                |         |
|------------------------------------------------------------------------------------------------|----------------|---------|
| Atherosclerosis of native artery of left lower extremity with ulceration of ankle              | 440.23, 707.13 | 170.243 |
| Atherosclerosis of left lower extremity with ulceration of ankle                               | 440.23, 707.13 | 170.243 |
| Atherosclerosis of native arteries of left leg with ulceration of ankle                        | 440.23, 707.13 | 170.243 |
| Athscl native arteries of left leg w ulceration of ankle                                       | 440.23, 707.13 | 170.243 |
| Atherosclerosis of native arteries of left leg with ulceration of ankle                        |                | 170.243 |
| Athscl native art of left leg w ulcer of heel and midfoot                                      | 440.23, 707.9  | 170.244 |
| Atherosclerosis of native artery of left lower extremity with ulceration of midfoot            | 440.23, 707.14 | 170.244 |
| Atherosclerosis of left lower extremity with ulceration of midfoot                             | 440.23, 707.14 | 170.244 |
| Atherosclerosis of native artery of left lower extremity with ulceration of heel               | 440.23, 707.14 | 170.244 |
| Atherosclerosis of left lower extremity with ulceration of heel                                | 440.23, 707.14 | 170.244 |
| Atherosclerosis of native arteries of left leg with ulceration of heel and midfoot             | 440.23, 707.9  | 170.244 |
| Atherosclerosis of native arteries of left leg with ulceration of heel and midfoot             |                | 170.244 |
| Athscl native arteries of left leg w ulceration oth prt foot                                   | 440.23, 707.9  | 170.245 |
| Atherosclerosis of native artery of left lower extremity with ulceration of other part of foot | 440.23, 707.9  | 170.245 |
| Atherosclerosis of native arteries of left leg with ulceration of other part of foot           | 440.23, 707.9  | 170.245 |
| Atherosclerosis of left lower extremity with ulceration of other part of foot                  | 440.23, 707.15 | 170.245 |
| Atherosclerosis of native arteries of left leg with ulceration of other part of foot           |                | 170.245 |

|                                                                                                       |                |         |
|-------------------------------------------------------------------------------------------------------|----------------|---------|
| Athscl native art of left leg w ulcer oth prt lower left leg                                          | 440.23, 707.9  | 170.248 |
| Atherosclerosis of native artery of left lower extremity with ulceration of other part of lower leg   | 440.23, 707.9  | 170.248 |
| Atherosclerosis of native arteries of left leg with ulceration of other part of lower left leg        | 440.23, 707.9  | 170.248 |
| Atherosclerosis of left lower extremity with ulceration of other part of lower leg                    | 440.23, 707.19 | 170.248 |
| Atherosclerosis of native arteries of left leg with ulceration of other part of lower left leg        |                | 170.248 |
| Atherosclerosis of native artery of left leg with ulceration                                          | 440.23, 707.9  | 170.249 |
| Atherosclerosis of native artery of left lower extremity with ulceration                              | 440.23, 707.9  | 170.249 |
| Atherosclerosis of left lower extremity with ulceration                                               | 440.23, 707.10 | 170.249 |
| Atherosclerosis of native arteries of left leg with ulceration of unspecified site                    | 440.23, 707.9  | 170.249 |
| Atherosclerosis of native artery of left lower extremity with ulceration, unspecified ulceration site | 440.23, 707.9  | 170.249 |
| Athscl native arteries of left leg w ulceration of unsp site                                          | 440.23, 707.9  | 170.249 |
| Atherosclerosis of native arteries of left leg with ulceration of unspecified site                    |                | 170.249 |
| Atherosclerotic femoro-popliteal artery disease with ulceration                                       | 440.23         | 170.25  |
| Atherosclerosis of native artery of leg with ulceration of ankle                                      | 440.23, 707.13 | 170.25  |
| Atherosclerosis of native artery of leg with ulceration of midfoot                                    | 440.23, 707.14 | 170.25  |
| Atherosclerosis of native artery of leg with ulceration of calf                                       | 440.23, 707.12 | 170.25  |

|                                                                                |                |        |
|--------------------------------------------------------------------------------|----------------|--------|
| Atherosclerosis of native artery of leg with ulceration of heel                | 440.23, 707.14 | 170.25 |
| Atherosclerosis of native artery of lower extremity with ulceration of calf    | 440.23, 707.12 | 170.25 |
| Atherosclerosis of native artery of lower extremity with ulceration of ankle   | 440.23, 707.13 | 170.25 |
| Atherosclerosis of native artery of lower extremity with ulceration of heel    | 440.23, 707.14 | 170.25 |
| Atherosclerosis of native artery of lower extremity with ulceration of midfoot | 440.23, 707.14 | 170.25 |
| Atherosclerosis of native arteries of the extremities with ulceration          | 440.23, 707.9  | 170.25 |
| Atherosclerosis of lower extremity with ulceration of thigh                    | 440.23, 707.11 | 170.25 |
| Atherosclerosis of lower extremity with ulceration                             | 440.23, 707.10 | 170.25 |
| Atherosclerosis of native artery of lower extremity with ulceration            | 440.23, 707.10 | 170.25 |
| Atherosclerosis of lower extremity with ulceration of heel                     | 440.23, 707.14 | 170.25 |
| Atherosclerosis of native artery of lower extremity with ulceration of thigh   | 440.23, 707.11 | 170.25 |
| Atherosclerosis of lower extremity with ulceration of ankle                    | 440.23, 707.13 | 170.25 |
| Atherosclerosis of lower extremity with ulceration of midfoot                  | 440.23, 707.14 | 170.25 |
| Atherosclerosis of lower extremity with ulceration of calf                     | 440.23, 707.12 | 170.25 |
| Atherosclerosis of native artery of extremity with ulceration                  | 440.23, 707.9  | 170.25 |
| Atherosclerosis of native artery of other extremity with ulceration            | 440.23, 707.9  | 170.25 |
| Atherosclerosis of native arteries of other extremities with ulceration        | 440.23, 707.9  | 170.25 |
| Atherosclerosis of other extremity with ulceration                             | 440.23, 707.9  | 170.25 |



|                                                                                                                          |                |        |
|--------------------------------------------------------------------------------------------------------------------------|----------------|--------|
| Atherosclerosis of native artery of lower extremity with ulceration of other part of foot                                | 440.23, 707.15 | I70.25 |
| Atherosclerosis of native artery of lower extremity with ulceration of other part of lower leg                           | 440.23, 707.19 | I70.25 |
| Atherosclerosis of lower extremity with ulceration of other part of foot                                                 | 440.23, 707.15 | I70.25 |
| Atherosclerosis of lower extremity with ulceration of other part of lower leg                                            | 440.23, 707.19 | I70.25 |
| Atherosclerosis of native artery of lower extremity with ulceration of midfoot, unspecified laterality                   | 440.23, 707.14 | I70.25 |
| Atherosclerosis of native artery of lower extremity with ulceration of calf, unspecified laterality                      | 440.23, 707.12 | I70.25 |
| Atherosclerosis of native artery of lower extremity with ulceration of ankle, unspecified laterality                     | 440.23, 707.13 | I70.25 |
| Atherosclerosis of native artery of lower extremity with ulceration, unspecified laterality, unspecified ulceration site | 440.23, 707.10 | I70.25 |
| Atherosclerosis of native artery of lower extremity with ulceration of other part of lower leg, unspecified laterality   | 440.23, 707.19 | I70.25 |
| Atherosclerosis of native artery of lower extremity with ulceration of heel, unspecified laterality                      | 440.23, 707.14 | I70.25 |
| Atherosclerosis of native artery of lower extremity with ulceration of thigh, unspecified laterality                     | 440.23, 707.11 | I70.25 |
| Atherosclerosis of native artery of lower extremity with ulceration of other part of foot, unspecified laterality        | 440.23, 707.15 | I70.25 |
| Atherosclerosis of native artery of extremity with ulceration, unspecified extremity                                     | 440.23, 707.9  | I70.25 |

|                                                                                |                |                 |
|--------------------------------------------------------------------------------|----------------|-----------------|
| Athscl native arteries of extremities w ulceration                             | 440.23, 707.9  | I70.25          |
| Atherosclerosis of native arteries of other extremities with ulceration        |                | I70.25          |
| Ischemic ulcer of lower leg due to atherosclerotic disease                     | 440.23, 707.12 | I70.25, L97.209 |
| Ischemic ulcer of lower leg due to atherosclerosis                             | 440.23, 707.12 | I70.25, L97.209 |
| Ischemic ulcer of midfoot due to atherosclerosis of native artery of extremity | 440.23, 707.14 | I70.25, L97.409 |
| Ischemic midfoot ulcer due to atherosclerosis of native artery of limb         | 440.23, 707.14 | I70.25, L97.409 |
| Ischemic ulcer of foot due to atherosclerosis of native artery of extremity    | 440.23, 707.15 | I70.25, L97.509 |
| Ischemic foot ulcer due to atherosclerosis of native artery of limb            | 440.23, 707.15 | I70.25, L97.509 |
| Atherosclerosis of native arteries of extremities with gangrene                |                | I70.26          |
| Atherosclerosis of native artery of right leg with gangrene                    | 440.24         | I70.261         |
| Atherosclerosis of native artery of right lower extremity with gangrene        | 440.24         | I70.261         |
| Atherosclerosis of right lower extremity with gangrene                         | 440.24         | I70.261         |
| Atherosclerosis of native arteries of extremities with gangrene, right leg     | 440.24         | I70.261         |
| Athscl native arteries of extremities w gangrene, right leg                    | 440.24         | I70.261         |
| Atherosclerosis of native arteries of extremities with gangrene, right leg     |                | I70.261         |
| Atherosclerosis of native artery of left lower extremity with gangrene         | 440.24         | I70.262         |
| Atherosclerosis of left lower extremity with gangrene                          | 440.24         | I70.262         |

|                                                                                  |        |         |
|----------------------------------------------------------------------------------|--------|---------|
| Atherosclerosis of native arteries of extremities with gangrene, left leg        | 440.24 | 170.262 |
| Athscl native arteries of extremities w gangrene, left leg                       | 440.24 | 170.262 |
| Atherosclerosis of native arteries of extremities with gangrene, left leg        |        | 170.262 |
| Atherosclerosis of native artery of both legs with gangrene                      | 440.24 | 170.263 |
| Atherosclerosis of native artery of both lower extremities with gangrene         | 440.24 | 170.263 |
| Atherosclerosis of both lower extremities with gangrene                          | 440.24 | 170.263 |
| Atherosclerosis of native arteries of extremities with gangrene, bilateral legs  | 440.24 | 170.263 |
| Athscl native arteries of extrm w gangrene, bilateral legs                       | 440.24 | 170.263 |
| Atherosclerosis of native arteries of extremities with gangrene, bilateral legs  |        | 170.263 |
| Athscl native arteries of extrm w gangrene, oth extremity                        | 440.24 | 170.268 |
| Atherosclerosis of native artery of other extremity with gangrene                | 440.24 | 170.268 |
| Atherosclerosis of native arteries of extremities with gangrene, other extremity | 440.24 | 170.268 |
| Atherosclerosis of other extremity with gangrene                                 | 440.24 | 170.268 |
| Atherosclerosis of native arteries of extremities with gangrene, other extremity |        | 170.268 |
| Atherosclerosis of native arteries of the extremities with gangrene              | 440.24 | 170.269 |
| Extremity atherosclerosis with gangrene                                          | 440.24 | 170.269 |
| Gangrene from atherosclerosis, extremities                                       | 440.24 | 170.269 |
| Atherosclerosis of native arteries of extremity with gangrene                    | 440.24 | 170.269 |

|                                                                                             |        |         |
|---------------------------------------------------------------------------------------------|--------|---------|
| Atherosclerotic peripheral vascular disease with gangrene                                   | 440.24 | 170.269 |
| Atherosclerotic femoro-popliteal artery disease with gangrene                               | 440.24 | 170.269 |
| Arteriosclerotic gangrene                                                                   | 440.24 | 170.269 |
| Generalized atherosclerosis with gangrene                                                   | 440.24 | 170.269 |
| Atherosclerosis of artery of extremity with gangrene                                        | 440.24 | 170.269 |
| Atherosclerosis of native artery of extremity with gangrene                                 | 440.24 | 170.269 |
| Atherosclerosis of native artery of lower extremity with gangrene                           | 440.24 | 170.269 |
| Atherosclerosis of extremity with gangrene                                                  | 440.24 | 170.269 |
| Atherosclerosis of lower extremity with gangrene                                            | 440.24 | 170.269 |
| Atherosclerosis of native arteries of extremities with gangrene, unspecified extremity      | 440.24 | 170.269 |
| Atherosclerosis of native artery of lower extremity with gangrene, unspecified laterality   | 440.24 | 170.269 |
| Atherosclerosis of native artery of extremity with gangrene, unspecified extremity          | 440.24 | 170.269 |
| Athscl native arteries of extrm w gangrene, unsp extremity                                  | 440.24 | 170.269 |
| Atherosclerosis of native arteries of extremities with gangrene, unspecified extremity      |        | 170.269 |
| Other atherosclerosis of native arteries of extremities                                     |        | 170.29  |
| Other atherosclerosis of native arteries of extremities, right leg                          | 440.29 | 170.291 |
| Atherosclerosis of native artery of right lower extremity with other clinical manifestation | 440.29 | 170.291 |

|                                                                                              |        |         |
|----------------------------------------------------------------------------------------------|--------|---------|
| Atherosclerosis of right lower extremity with other clinical manifestation                   | 440.29 | 170.291 |
| Other atherosclerosis of native arteries of extremities, right leg                           |        | 170.291 |
| Other atherosclerosis of native arteries of extremities, left leg                            | 440.29 | 170.292 |
| Atherosclerosis of left lower extremity with other clinical manifestation                    | 440.29 | 170.292 |
| Atherosclerosis of native artery of left lower extremity with other clinical manifestation   | 440.29 | 170.292 |
| Other atherosclerosis of native arteries of extremities, left leg                            |        | 170.292 |
| Oth athscl native arteries of extremities, bilateral legs                                    | 440.29 | 170.293 |
| Other atherosclerosis of native arteries of extremities, bilateral legs                      | 440.29 | 170.293 |
| Atherosclerosis of native artery of both lower extremities with other clinical manifestation | 440.29 | 170.293 |
| Atherosclerosis of both lower extremities with other clinical manifestation                  | 440.29 | 170.293 |
| Other atherosclerosis of native arteries of extremities, bilateral legs                      |        | 170.293 |
| Other atherosclerosis of native artery of other extremity                                    | 440.29 | 170.298 |
| Other atherosclerosis of native arteries of extremities, other extremity                     | 440.29 | 170.298 |
| Oth athscl native arteries of extremities, oth extremity                                     | 440.29 | 170.298 |
| Atherosclerosis of other extremity with other clinical manifestation                         | 440.29 | 170.298 |
| Atherosclerosis of native artery of other extremity with other clinical manifestation        | 440.29 | 170.298 |
| Other atherosclerosis of native arteries of extremities, other extremity                     |        | 170.298 |

|                                                                                                               |                |                  |
|---------------------------------------------------------------------------------------------------------------|----------------|------------------|
| Other atherosclerosis of native arteries of the extremities                                                   | 440.29         | 170.299          |
| Other atherosclerosis of native artery of extremity                                                           | 440.29         | 170.299          |
| Other atherosclerosis of native arteries of extremities, unspecified extremity                                | 440.29         | 170.299          |
| Atherosclerosis of native artery of extremity with other clinical manifestation                               | 440.29         | 170.299          |
| Atherosclerosis of extremity with other clinical manifestation                                                | 440.29         | 170.299          |
| Atherosclerosis of native artery of lower extremity with other clinical manifestation                         | 440.29         | 170.299          |
| Atherosclerosis of lower extremity with other clinical manifestation                                          | 440.29         | 170.299          |
| Atherosclerosis of native artery of lower extremity with other clinical manifestation, unspecified laterality | 440.29         | 170.299          |
| Atherosclerosis of native artery of extremity with other clinical manifestation, unspecified extremity        | 440.29         | 170.299          |
| Oth athscl native arteries of extremities, unsp extremity                                                     | 440.29         | 170.299          |
| Other atherosclerosis of native arteries of extremities, unspecified extremity                                |                | 170.299          |
| Atherosclerosis of native artery of leg with ulceration of foot                                               | 440.23, 707.15 | 170.299, L97.509 |
| Atherosclerosis of native artery of lower extremity with ulceration of foot                                   | 440.23, 707.15 | 170.299, L97.509 |
| Atherosclerosis of artery of extremity with ulceration                                                        | 440.23         | 170.299, L97.909 |
| Atherosclerosis of unspecified type of bypass graft(s) of the extremities                                     |                | 170.3            |
| Unspecified atherosclerosis of unspecified type of bypass graft(s) of the extremities                         |                | 170.30           |

|                                                                                                                |       |         |
|----------------------------------------------------------------------------------------------------------------|-------|---------|
| Atherosclerosis of bypass graft of right lower extremity                                                       | 440.3 | 170.301 |
| Unspecified atherosclerosis of unspecified type of bypass graft(s) of the extremities, right leg               | 440.3 | 170.301 |
| Atherosclerosis of bypass graft of right lower extremity, with unspecified presence of clinical manifestation  | 440.3 | 170.301 |
| Unsp athscl unsp type bypass of the extremities, right leg                                                     | 440.3 | 170.301 |
| Unspecified atherosclerosis of unspecified type of bypass graft(s) of the extremities, right leg               |       | 170.301 |
| Atherosclerosis of bypass graft of left lower extremity                                                        | 440.3 | 170.302 |
| Unspecified atherosclerosis of unspecified type of bypass graft(s) of the extremities, left leg                | 440.3 | 170.302 |
| Atherosclerosis of bypass graft of left lower extremity, with unspecified presence of clinical manifestation   | 440.3 | 170.302 |
| Unsp athscl unsp type bypass of the extremities, left leg                                                      | 440.3 | 170.302 |
| Unspecified atherosclerosis of unspecified type of bypass graft(s) of the extremities, left leg                |       | 170.302 |
| Atherosclerosis of bypass graft of both lower extremities                                                      | 440.3 | 170.303 |
| Unspecified atherosclerosis of unspecified type of bypass graft(s) of the extremities, bilateral legs          | 440.3 | 170.303 |
| Atherosclerosis of bypass graft of both lower extremities, with unspecified presence of clinical manifestation | 440.3 | 170.303 |
| Unsp athscl unsp type bypass of the extrm, bilateral legs                                                      | 440.3 | 170.303 |

|                                                                                                                                 |       |         |
|---------------------------------------------------------------------------------------------------------------------------------|-------|---------|
| Unspecified atherosclerosis of unspecified type of bypass graft(s) of the extremities, bilateral legs                           |       | 170.303 |
| Unsp athscl unsp type bypass of the extrm, oth extremity                                                                        | 440.3 | 170.308 |
| Atherosclerosis of bypass graft of other extremity                                                                              | 440.3 | 170.308 |
| Unspecified atherosclerosis of unspecified type of bypass graft(s) of the extremities, other extremity                          | 440.3 | 170.308 |
| Atherosclerosis of bypass graft of other extremity, with unspecified presence of clinical manifestation                         | 440.3 | 170.308 |
| Unspecified atherosclerosis of unspecified type of bypass graft(s) of the extremities, other extremity                          |       | 170.308 |
| Atherosclerosis of unspecified bypass graft of extremities                                                                      | 440.3 | 170.309 |
| Atherosclerosis of bypass graft of extremity                                                                                    | 440.3 | 170.309 |
| Atherosclerosis of bypass graft of limb                                                                                         | 440.3 | 170.309 |
| Atherosclerosis of aorto-iliac bypass graft                                                                                     | 440.3 | 170.309 |
| Hardening of bypass graft of limb                                                                                               | 440.3 | 170.309 |
| Atherosclerosis of bypass graft of extremities                                                                                  | 440.3 | 170.309 |
| Atherosclerosis of bypass graft of the extremities                                                                              | 440.3 | 170.309 |
| Atherosclerosis of bypass graft of lower extremity                                                                              | 440.3 | 170.309 |
| Unspecified atherosclerosis of unspecified type of bypass graft(s) of the extremities, unspecified extremity                    | 440.3 | 170.309 |
| Atherosclerosis of bypass graft of lower extremity, unspecified laterality, with unspecified presence of clinical manifestation | 440.3 | 170.309 |



|                                                                                                                          |       |         |
|--------------------------------------------------------------------------------------------------------------------------|-------|---------|
| Atherosclerosis of bypass graft of extremity, unspecified extremity, with unspecified presence of clinical manifestation | 440.3 | 170.309 |
| Hardening of bypass graft of extremity                                                                                   | 440.3 | 170.309 |
| Unsp athscl unsp type bypass of the extrm, unsp extremity                                                                | 440.3 | 170.309 |
| Unspecified atherosclerosis of unspecified type of bypass graft(s) of the extremities, unspecified extremity             |       | 170.309 |
| Atherosclerosis of unspecified type of bypass graft(s) of the extremities with intermittent claudication                 |       | 170.31  |
| Atheroscler of bypass graft of right leg with intermit claudication                                                      | 440.3 | 170.311 |
| Atherosclerosis of bypass graft of right lower extremity with intermittent claudication                                  | 440.3 | 170.311 |
| Atherosclerosis of unspecified type of bypass graft(s) of the extremities with intermittent claudication, right leg      | 440.3 | 170.311 |
| Athscl unsp type bypass of extrm w intrmt claud, right leg                                                               | 440.3 | 170.311 |
| Atherosclerosis of unspecified type of bypass graft(s) of the extremities with intermittent claudication, right leg      |       | 170.311 |
| Atheroscler of bypass graft of left leg with intermittent claudication                                                   | 440.3 | 170.312 |
| Atherosclerosis of bypass graft of left lower extremity with intermittent claudication                                   | 440.3 | 170.312 |
| Atherosclerosis of unspecified type of bypass graft(s) of the extremities with intermittent claudication, left leg       | 440.3 | 170.312 |
| Athscl unsp type bypass of extrm w intrmt claud, left leg                                                                | 440.3 | 170.312 |

|                                                                                                                                 |               |         |
|---------------------------------------------------------------------------------------------------------------------------------|---------------|---------|
| Atherosclerosis of unspecified type of bypass graft(s) of the extremities with intermittent claudication, left leg              |               | 170.312 |
| Atheroscler of bypass graft of both legs with intermit claudication                                                             | 440.3         | 170.313 |
| Atherosclerosis of bypass graft of both lower extremities with intermittent claudication                                        | 440.3         | 170.313 |
| Atherosclerosis of unspecified type of bypass graft(s) of the extremities with intermittent claudication, bilateral legs        | 440.3         | 170.313 |
| Athsc l unsp type bypass of the extrm w intrmt claud, bi legs                                                                   | 440.3         | 170.313 |
| Atherosclerosis of unspecified type of bypass graft(s) of the extremities with intermittent claudication, bilateral legs        |               | 170.313 |
| Athsc l unsp type bypass of extrm w intrmt claud, oth extrm                                                                     | 440.3         | 170.318 |
| Atherosclerosis of bypass graft of other extremity with intermittent claudication                                               | 440.3         | 170.318 |
| Atherosclerosis of unspecified type of bypass graft(s) of the extremities with intermittent claudication, other extremity       | 440.3         | 170.318 |
| Atherosclerosis of unspecified type of bypass graft(s) of the extremities with intermittent claudication, other extremity       |               | 170.318 |
| Atheroscler of bypass graft of extremity with intermit claudication                                                             | 440.3         | 170.319 |
| Atherosclerosis of bypass graft of extremity with intermittent claudication                                                     | 440.3         | 170.319 |
| Atherosclerosis of bypass graft of lower extremity with intermittent claudication                                               | 440.30, 443.9 | 170.319 |
| Atherosclerosis of unspecified type of bypass graft(s) of the extremities with intermittent claudication, unspecified extremity | 440.3         | 170.319 |

|                                                                                                                                 |               |         |
|---------------------------------------------------------------------------------------------------------------------------------|---------------|---------|
| Atherosclerosis of bypass graft of lower extremity with intermittent claudication, unspecified laterality                       | 440.30, 443.9 | I70.319 |
| Atherosclerosis of bypass graft of extremity with intermittent claudication, unspecified extremity                              | 440.3         | I70.319 |
| Athscl unsp type bypass of extrm w intrmt claud, unsp extrm                                                                     | 440.3         | I70.319 |
| Atherosclerosis of unspecified type of bypass graft(s) of the extremities with intermittent claudication, unspecified extremity |               | I70.319 |
| Atherosclerosis of unspecified type of bypass graft(s) of the extremities with rest pain                                        |               | I70.32  |
| Atherosclerosis of bypass graft of right leg with rest pain                                                                     | 440.3         | I70.321 |
| Atherosclerosis of bypass graft of right lower extremity with rest pain                                                         | 440.3         | I70.321 |
| Atherosclerosis of unspecified type of bypass graft(s) of the extremities with rest pain, right leg                             | 440.3         | I70.321 |
| Athscl unsp type bypass of the extrm w rest pain, right leg                                                                     | 440.3         | I70.321 |
| Atherosclerosis of unspecified type of bypass graft(s) of the extremities with rest pain, right leg                             |               | I70.321 |
| Atherosclerosis of bypass graft of left lower extremity with rest pain                                                          | 440.3         | I70.322 |
| Atherosclerosis of unspecified type of bypass graft(s) of the extremities with rest pain, left leg                              | 440.3         | I70.322 |
| Athscl unsp type bypass of the extrm w rest pain, left leg                                                                      | 440.3         | I70.322 |
| Atherosclerosis of unspecified type of bypass graft(s) of the extremities with rest pain, left leg                              |               | I70.322 |

|                                                                                                                 |       |         |
|-----------------------------------------------------------------------------------------------------------------|-------|---------|
| Atherosclerosis of bypass graft of both legs with rest pain                                                     | 440.3 | 170.323 |
| Atherosclerosis of bypass graft of both lower extremities with rest pain                                        | 440.3 | 170.323 |
| Atherosclerosis of unspecified type of bypass graft(s) of the extremities with rest pain, bilateral legs        | 440.3 | 170.323 |
| Athscl unsp type bypass of the extrm w rest pain, bi legs                                                       | 440.3 | 170.323 |
| Atherosclerosis of unspecified type of bypass graft(s) of the extremities with rest pain, bilateral legs        |       | 170.323 |
| Athscl unsp type bypass of the extrm w rest pain, oth extrm                                                     | 440.3 | 170.328 |
| Atherosclerosis of bypass graft of other extremity with rest pain                                               | 440.3 | 170.328 |
| Atherosclerosis of unspecified type of bypass graft(s) of the extremities with rest pain, other extremity       | 440.3 | 170.328 |
| Atherosclerosis of unspecified type of bypass graft(s) of the extremities with rest pain, other extremity       |       | 170.328 |
| Atherosclerosis of bypass graft of extremity with rest pain                                                     | 440.3 | 170.329 |
| Atherosclerosis of bypass graft of lower extremity with rest pain                                               | 440.3 | 170.329 |
| Atherosclerosis of unspecified type of bypass graft(s) of the extremities with rest pain, unspecified extremity | 440.3 | 170.329 |
| Atherosclerosis of bypass graft of lower extremity with rest pain, unspecified laterality                       | 440.3 | 170.329 |
| Atherosclerosis of bypass graft of extremity with rest pain, unspecified extremity                              | 440.3 | 170.329 |
| Athscl unsp type bypass of the extrm w rest pain, unsp extrm                                                    | 440.3 | 170.329 |

|                                                                                                                 |                |                  |
|-----------------------------------------------------------------------------------------------------------------|----------------|------------------|
| Atherosclerosis of unspecified type of bypass graft(s) of the extremities with rest pain, unspecified extremity |                | 170.329          |
| Atherosclerosis of unspecified type of bypass graft(s) of the right leg with ulceration                         |                | 170.33           |
| Atherosclerosis of bypass graft of right leg with ulceration of thigh                                           | 440.3          | 170.331          |
| Atherosclerosis of bypass graft of right lower extremity with ulceration of thigh                               | 440.3          | 170.331          |
| Atherosclerosis of unspecified type of bypass graft(s) of the right leg with ulceration of thigh                | 440.3          | 170.331          |
| Athscl unsp type bypass of the right leg w ulcer of thigh                                                       | 440.3          | 170.331          |
| Atherosclerosis of unspecified type of bypass graft(s) of the right leg with ulceration of thigh                |                | 170.331          |
| Atherosclerosis of bypass graft of both lower extremities with bilateral ulceration of thighs                   | 440.30, 707.11 | 170.331, 170.341 |
| Atherosclerosis of bypass graft of right leg with ulceration of calf                                            | 440.3          | 170.332          |
| Atherosclerosis of bypass graft of right lower extremity with ulceration of calf                                | 440.3          | 170.332          |
| Atherosclerosis of unspecified type of bypass graft(s) of the right leg with ulceration of calf                 | 440.3          | 170.332          |
| Athscl unsp type bypass of the right leg w ulcer of calf                                                        | 440.3          | 170.332          |
| Atherosclerosis of unspecified type of bypass graft(s) of the right leg with ulceration of calf                 |                | 170.332          |
| Atherosclerosis of bypass graft of both lower extremities with bilateral ulceration of calves                   | 440.30, 707.12 | 170.332, 170.342 |

|                                                                                                             |                |                  |
|-------------------------------------------------------------------------------------------------------------|----------------|------------------|
| Atherosclerosis of bypass graft of right leg with ulceration of ankle                                       | 440.3          | 170.333          |
| Atherosclerosis of bypass graft of right lower extremity with ulceration of ankle                           | 440.3          | 170.333          |
| Atherosclerosis of unspecified type of bypass graft(s) of the right leg with ulceration of ankle            | 440.3          | 170.333          |
| Athscl unsp type bypass of the right leg w ulcer of ankle                                                   | 440.3          | 170.333          |
| Atherosclerosis of unspecified type of bypass graft(s) of the right leg with ulceration of ankle            |                | 170.333          |
| Atherosclerosis of bypass graft of both lower extremities with bilateral ulceration of ankles               | 440.30, 707.13 | 170.333, 170.343 |
| Athscl unsp type bypass of r leg w ulcer of heel and midft                                                  | 440.3          | 170.334          |
| Atherosclerosis of bypass graft of right lower extremity with ulceration of heel                            | 440.30, 707.14 | 170.334          |
| Atherosclerosis of bypass graft of right lower extremity with ulceration of midfoot                         | 440.30, 707.14 | 170.334          |
| Atherosclerosis of unspecified type of bypass graft(s) of the right leg with ulceration of heel and midfoot | 440.3          | 170.334          |
| Atherosclerosis of unspecified type of bypass graft(s) of the right leg with ulceration of heel and midfoot |                | 170.334          |
| Atherosclerosis of bypass graft of both lower extremities with bilateral ulceration of heels                | 440.30, 707.14 | 170.334, 170.344 |
| Atherosclerosis of bypass graft of both lower extremities with bilateral ulceration of midfeet              | 440.30, 707.14 | 170.334, 170.344 |
| Athscl unsp type bypass of right leg w ulcer oth prt foot                                                   | 440.3          | 170.335          |

|                                                                                                                    |                |                  |
|--------------------------------------------------------------------------------------------------------------------|----------------|------------------|
| Atherosclerosis of bypass graft of right lower extremity with ulceration of other part of foot                     | 440.3          | 170.335          |
| Atherosclerosis of unspecified type of bypass graft(s) of the right leg with ulceration of other part of foot      | 440.3          | 170.335          |
| Atherosclerosis of unspecified type of bypass graft(s) of the right leg with ulceration of other part of foot      |                | 170.335          |
| Atherosclerosis of bypass graft of both lower extremities with bilateral ulceration of other part of feet          | 440.30, 707.15 | 170.335, 170.345 |
| Athscl unsp type bypass of right leg w ulcer oth prt low leg                                                       | 440.3          | 170.338          |
| Atherosclerosis of bypass graft of right lower extremity with ulceration of other part of lower leg                | 440.3          | 170.338          |
| Atherosclerosis of unspecified type of bypass graft(s) of the right leg with ulceration of other part of lower leg | 440.3          | 170.338          |
| Atherosclerosis of unspecified type of bypass graft(s) of the right leg with ulceration of other part of lower leg |                | 170.338          |
| Atherosclerosis of bypass graft of both lower extremities with bilateral ulceration of other part of lower legs    | 440.30, 707.19 | 170.338, 170.348 |
| Atherosclerosis of bypass graft of right leg with ulceration                                                       | 440.30, 707.10 | 170.339          |
| Atherosclerosis of bypass graft of right lower extremity with ulceration                                           | 440.30, 707.10 | 170.339          |
| Atherosclerosis of unspecified type of bypass graft(s) of the right leg with ulceration of unspecified site        | 440.30, 707.10 | 170.339          |
| Atherosclerosis of bypass graft of right lower extremity with ulceration, unspecified ulceration site              | 440.30, 707.10 | 170.339          |

|                                                                                                                  |                |                  |
|------------------------------------------------------------------------------------------------------------------|----------------|------------------|
| Athscl unsp type bypass of right leg w ulcer of unsp site                                                        | 440.30, 707.10 | 170.339          |
| Atherosclerosis of unspecified type of bypass graft(s) of the right leg with ulceration of unspecified site      |                | 170.339          |
| Atherosclerosis of bypass graft of both lower extremities with bilateral ulceration                              | 440.30, 707.10 | 170.339, 170.349 |
| Atherosclerosis of bypass graft of both lower extremities with bilateral ulceration, unspecified ulceration site | 440.30, 707.10 | 170.339, 170.349 |
| Atherosclerosis of unspecified type of bypass graft(s) of the left leg with ulceration                           |                | 170.34           |
| Atherosclerosis of bypass graft of left leg with ulceration of thigh                                             | 440.30, 707.11 | 170.341          |
| Atherosclerosis of bypass graft of left lower extremity with ulceration of thigh                                 | 440.30, 707.11 | 170.341          |
| Atherosclerosis of unspecified type of bypass graft(s) of the left leg with ulceration of thigh                  | 440.30, 707.11 | 170.341          |
| Athscl unsp type bypass of the left leg w ulcer of thigh                                                         | 440.30, 707.11 | 170.341          |
| Atherosclerosis of unspecified type of bypass graft(s) of the left leg with ulceration of thigh                  |                | 170.341          |
| Atherosclerosis of bypass graft of left leg with ulceration of calf                                              | 440.30, 707.12 | 170.342          |
| Atherosclerosis of bypass graft of left lower extremity with ulceration of calf                                  | 440.30, 707.12 | 170.342          |
| Atherosclerosis of unspecified type of bypass graft(s) of the left leg with ulceration of calf                   | 440.30, 707.12 | 170.342          |
| Athscl unsp type bypass of the left leg w ulceration of calf                                                     | 440.30, 707.12 | 170.342          |
| Atherosclerosis of unspecified type of bypass graft(s) of the left leg with ulceration of calf                   |                | 170.342          |



|                                                                                                              |                |         |
|--------------------------------------------------------------------------------------------------------------|----------------|---------|
| Atherosclerosis of bypass graft of left leg with ulceration of ankle                                         | 440.3          | 170.343 |
| Atherosclerosis of bypass graft of left lower extremity with ulceration of ankle                             | 440.3          | 170.343 |
| Atherosclerosis of unspecified type of bypass graft(s) of the left leg with ulceration of ankle              | 440.3          | 170.343 |
| Athscl unsp type bypass of the left leg w ulcer of ankle                                                     | 440.3          | 170.343 |
| Atherosclerosis of unspecified type of bypass graft(s) of the left leg with ulceration of ankle              |                | 170.343 |
| Athscl unsp type bypass of left leg w ulc of heel and midft                                                  | 440.3          | 170.344 |
| Atherosclerosis of bypass graft of left lower extremity with ulceration of heel                              | 440.30, 707.14 | 170.344 |
| Atherosclerosis of bypass graft of left lower extremity with ulceration of midfoot                           | 440.30, 707.14 | 170.344 |
| Atherosclerosis of unspecified type of bypass graft(s) of the left leg with ulceration of heel and midfoot   | 440.3          | 170.344 |
| Atherosclerosis of unspecified type of bypass graft(s) of the left leg with ulceration of heel and midfoot   |                | 170.344 |
| Athscl unsp type bypass of the left leg w ulcer oth prt foot                                                 | 440.3          | 170.345 |
| Atherosclerosis of bypass graft of left lower extremity with ulceration of other part of foot                | 440.3          | 170.345 |
| Atherosclerosis of unspecified type of bypass graft(s) of the left leg with ulceration of other part of foot | 440.3          | 170.345 |
| Atherosclerosis of unspecified type of bypass graft(s) of the left leg with ulceration of other part of foot |                | 170.345 |
| Athscl unsp type bypass of left leg w ulcer oth prt low leg                                                  | 440.3          | 170.348 |

|                                                                                                                   |               |         |
|-------------------------------------------------------------------------------------------------------------------|---------------|---------|
| Atherosclerosis of bypass graft of left lower extremity with ulceration of other part of lower leg                | 440.3         | 170.348 |
| Atherosclerosis of unspecified type of bypass graft(s) of the left leg with ulceration of other part of lower leg | 440.3         | 170.348 |
| Atherosclerosis of unspecified type of bypass graft(s) of the left leg with ulceration of other part of lower leg |               | 170.348 |
| Atherosclerosis of bypass graft of left leg with ulceration                                                       | 440.3         | 170.349 |
| Atherosclerosis of bypass graft of left lower extremity with ulceration                                           | 440.3         | 170.349 |
| Atherosclerosis of unspecified type of bypass graft(s) of the left leg with ulceration of unspecified site        | 440.3         | 170.349 |
| Atherosclerosis of bypass graft of left lower extremity with ulceration, unspecified ulceration site              | 440.3         | 170.349 |
| Athscl unsp type bypass of the left leg w ulcer of unsp site                                                      | 440.3         | 170.349 |
| Atherosclerosis of unspecified type of bypass graft(s) of the left leg with ulceration of unspecified site        |               | 170.349 |
| Athscl unsp type bypass graft(s) of extremity w ulceration                                                        | 440.30, 707.9 | 170.35  |
| Atherosclerosis of bypass graft of lower extremity with ulceration                                                | 443.9, 707.10 | 170.35  |
| Atherosclerosis of bypass graft of lower extremity with ulceration of calf                                        | 443.9, 707.12 | 170.35  |
| Atherosclerosis of bypass graft of lower extremity with ulceration of thigh                                       | 443.9, 707.11 | 170.35  |
| Atherosclerosis of bypass graft of lower extremity with ulceration of heel                                        | 443.9, 707.14 | 170.35  |
| Atherosclerosis of bypass graft of lower extremity with ulceration of midfoot                                     | 443.9, 707.14 | 170.35  |

|                                                                                                                         |               |        |
|-------------------------------------------------------------------------------------------------------------------------|---------------|--------|
| Atherosclerosis of bypass graft of lower extremity with ulceration of ankle                                             | 443.9, 707.13 | 170.35 |
| Atherosclerosis of bypass graft of extremity with ulceration                                                            | 440.30, 707.9 | 170.35 |
| Atherosclerosis of bypass graft of other extremity with ulceration                                                      | 440.30, 707.9 | 170.35 |
| Atherosclerosis of unspecified type of bypass graft(s) of other extremity with ulceration                               | 440.30, 707.9 | 170.35 |
| Atherosclerosis of bypass graft of lower extremity with ulceration of other part of lower leg                           | 443.9, 707.19 | 170.35 |
| Atherosclerosis of bypass graft of lower extremity with ulceration of other part of foot                                | 443.9, 707.15 | 170.35 |
| Atherosclerosis of bypass graft of lower extremity with ulceration of other part of foot, unspecified laterality        | 443.9, 707.15 | 170.35 |
| Atherosclerosis of bypass graft of lower extremity with ulceration of ankle, unspecified laterality                     | 443.9, 707.13 | 170.35 |
| Atherosclerosis of bypass graft of lower extremity with ulceration of thigh, unspecified laterality                     | 443.9, 707.11 | 170.35 |
| Atherosclerosis of bypass graft of lower extremity with ulceration of other part of lower leg, unspecified laterality   | 443.9, 707.19 | 170.35 |
| Atherosclerosis of bypass graft of lower extremity with ulceration of calf, unspecified laterality                      | 443.9, 707.12 | 170.35 |
| Atherosclerosis of bypass graft of lower extremity with ulceration of midfoot, unspecified laterality                   | 443.9, 707.14 | 170.35 |
| Atherosclerosis of bypass graft of lower extremity with ulceration, unspecified laterality, unspecified ulceration site | 443.9, 707.10 | 170.35 |

|                                                                                                    |               |         |
|----------------------------------------------------------------------------------------------------|---------------|---------|
| Atherosclerosis of bypass graft of lower extremity with ulceration of heel, unspecified laterality | 443.9, 707.14 | 170.35  |
| Atherosclerosis of bypass graft of extremity with ulceration, unspecified extremity                | 440.30, 707.9 | 170.35  |
| Atherosclerosis of unspecified type of bypass graft(s) of other extremity with ulceration          |               | 170.35  |
| Atherosclerosis of unspecified type of bypass graft(s) of the extremities with gangrene            |               | 170.36  |
| Atherosclerosis of bypass graft of right lower extremity with gangrene                             | 440.3         | 170.361 |
| Atherosclerosis of unspecified type of bypass graft(s) of the extremities with gangrene, right leg | 440.3         | 170.361 |
| Atherosclerosis of unspecified type of bypass of the extremity with gangrene, right leg            | 440.3         | 170.361 |
| Atherosclerosis of unspecified type of bypass graft(s) of the extremities with gangrene, right leg |               | 170.361 |
| Atherosclerosis of bypass graft of left lower extremity with gangrene                              | 440.3         | 170.362 |
| Atherosclerosis of unspecified type of bypass graft(s) of the extremities with gangrene, left leg  | 440.3         | 170.362 |
| Atherosclerosis of unspecified type of bypass of the extremity with gangrene, left leg             | 440.3         | 170.362 |
| Atherosclerosis of unspecified type of bypass graft(s) of the extremities with gangrene, left leg  |               | 170.362 |
| Atherosclerosis of bypass graft of both legs with gangrene                                         | 440.30, 785.4 | 170.363 |
| Atherosclerosis of bypass graft of both lower extremities with gangrene                            | 440.30, 785.4 | 170.363 |

|                                                                                                                |               |         |
|----------------------------------------------------------------------------------------------------------------|---------------|---------|
| Atherosclerosis of unspecified type of bypass graft(s) of the extremities with gangrene, bilateral legs        | 440.30, 785.4 | 170.363 |
| Athscl unsp type bypass of the extrm w gangrene, bi legs                                                       | 440.30, 785.4 | 170.363 |
| Atherosclerosis of unspecified type of bypass graft(s) of the extremities with gangrene, bilateral legs        |               | 170.363 |
| Athscl unsp type bypass of the extrm w gangrene, oth extrm                                                     | 440.3         | 170.368 |
| Atherosclerosis of bypass graft of other extremity with gangrene                                               | 440.3         | 170.368 |
| Atherosclerosis of unspecified type of bypass graft(s) of the extremities with gangrene, other extremity       | 440.3         | 170.368 |
| Atherosclerosis of unspecified type of bypass graft(s) of the extremities with gangrene, other extremity       |               | 170.368 |
| Atherosclerosis of bypass graft of extremity with gangrene                                                     | 440.3         | 170.369 |
| Atherosclerosis of bypass graft of lower extremity with gangrene                                               | 440.30, 785.4 | 170.369 |
| Atherosclerosis of unspecified type of bypass graft(s) of the extremities with gangrene, unspecified extremity | 440.3         | 170.369 |
| Atherosclerosis of bypass graft of lower extremity with gangrene, unspecified laterality                       | 440.30, 785.4 | 170.369 |
| Atherosclerosis of bypass graft of extremity with gangrene, unspecified extremity                              | 440.3         | 170.369 |
| Athscl unsp type bypass of the extrm w gangrene, unsp extrm                                                    | 440.3         | 170.369 |
| Atherosclerosis of unspecified type of bypass graft(s) of the extremities with gangrene, unspecified extremity |               | 170.369 |
| Other atherosclerosis of unspecified type of bypass graft(s) of the extremities                                |               | 170.39  |

|                                                                                                  |       |         |
|--------------------------------------------------------------------------------------------------|-------|---------|
| Oth athscl unsp type bypass of the extremities, right leg                                        | 440.3 | 170.391 |
| Other atherosclerosis of unspecified type of bypass graft(s) of the extremities, right leg       | 440.3 | 170.391 |
| Atherosclerosis of bypass graft of right lower extremity with other clinical manifestation       | 440.3 | 170.391 |
| Other atherosclerosis of unspecified type of bypass graft(s) of the extremities, right leg       |       | 170.391 |
| Oth athscl unsp type bypass of the extremities, left leg                                         | 440.3 | 170.392 |
| Other atherosclerosis of unspecified type of bypass graft(s) of the extremities, left leg        | 440.3 | 170.392 |
| Atherosclerosis of bypass graft of left lower extremity with other clinical manifestation        | 440.3 | 170.392 |
| Other atherosclerosis of unspecified type of bypass graft(s) of the extremities, left leg        |       | 170.392 |
| Oth athscl unsp type bypass of the extrm, bilateral legs                                         | 440.3 | 170.393 |
| Other atherosclerosis of unspecified type of bypass graft(s) of the extremities, bilateral legs  | 440.3 | 170.393 |
| Atherosclerosis of bypass graft of both lower extremities with other clinical manifestation      | 440.3 | 170.393 |
| Other atherosclerosis of unspecified type of bypass graft(s) of the extremities, bilateral legs  |       | 170.393 |
| Oth athscl unsp type bypass of the extrm, oth extremity                                          | 440.3 | 170.398 |
| Other atherosclerosis of unspecified type of bypass graft(s) of the extremities, other extremity | 440.3 | 170.398 |

|                                                                                                              |        |         |
|--------------------------------------------------------------------------------------------------------------|--------|---------|
| Atherosclerosis of bypass graft of other extremity with other clinical manifestation                         | 440.3  | 170.398 |
| Other atherosclerosis of unspecified type of bypass graft(s) of the extremities, other extremity             |        | 170.398 |
| Oth athscl unsp type bypass of the extrm, unsp extremity                                                     | 440.3  | 170.399 |
| Other atherosclerosis of unspecified type of bypass graft(s) of the extremities, unspecified extremity       | 440.3  | 170.399 |
| Atherosclerosis of bypass graft of extremity with other clinical manifestation                               | 440.3  | 170.399 |
| Atherosclerosis of bypass graft of lower extremity with other clinical manifestation                         | 440.3  | 170.399 |
| Atherosclerosis of bypass graft of lower extremity with other clinical manifestation, unspecified laterality | 440.3  | 170.399 |
| Atherosclerosis of bypass graft of extremity with other clinical manifestation, unspecified extremity        | 440.3  | 170.399 |
| Other atherosclerosis of unspecified type of bypass graft(s) of the extremities, unspecified extremity       |        | 170.399 |
| Atherosclerosis of autologous vein bypass graft(s) of the extremities                                        |        | 170.4   |
| Unspecified atherosclerosis of autologous vein bypass graft(s) of the extremities                            |        | 170.40  |
| Atherosclerosis of autologous vein bypass graft of right leg                                                 | 440.31 | 170.401 |
| Atherosclerosis of autologous vein bypass graft of right lower extremity                                     | 440.31 | 170.401 |
| Unspecified atherosclerosis of autologous vein bypass graft(s) of the extremities, right leg                 | 440.31 | 170.401 |

|                                                                                                                               |        |         |
|-------------------------------------------------------------------------------------------------------------------------------|--------|---------|
| Atherosclerosis of autologous vein bypass graft of right lower extremity, with unspecified presence of clinical manifestation | 440.31 | 170.401 |
| Atherosclerosis of autologous bypass graft of right lower extremity                                                           | 440.31 | 170.401 |
| Unsp athscl autologous vein bypass of the extrm, right leg                                                                    | 440.31 | 170.401 |
| Unspecified atherosclerosis of autologous vein bypass graft(s) of the extremities, right leg                                  |        | 170.401 |
| Atherosclerosis of autologous vein bypass graft of left leg                                                                   | 440.31 | 170.402 |
| Atherosclerosis of autologous vein bypass graft of left lower extremity                                                       | 440.31 | 170.402 |
| Unspecified atherosclerosis of autologous vein bypass graft(s) of the extremities, left leg                                   | 440.31 | 170.402 |
| Atherosclerosis of autologous vein bypass graft of left lower extremity, with unspecified presence of clinical manifestation  | 440.31 | 170.402 |
| Atherosclerosis of autologous bypass graft of left lower extremity                                                            | 440.31 | 170.402 |
| Unsp athscl autologous vein bypass of the extrm, left leg                                                                     | 440.31 | 170.402 |
| Unspecified atherosclerosis of autologous vein bypass graft(s) of the extremities, left leg                                   |        | 170.402 |
| Atherosclerosis of autologous vein bypass graft of both legs                                                                  | 440.31 | 170.403 |
| Atherosclerosis of autologous vein bypass graft of both lower extremities                                                     | 440.31 | 170.403 |
| Unspecified atherosclerosis of autologous vein bypass graft(s) of the extremities, bilateral legs                             | 440.31 | 170.403 |



|                                                                                                                                |        |         |
|--------------------------------------------------------------------------------------------------------------------------------|--------|---------|
| Atherosclerosis of autologous vein bypass graft of both lower extremities, with unspecified presence of clinical manifestation | 440.31 | 170.403 |
| Atherosclerosis of autologous bypass graft of both lower extremities                                                           | 440.31 | 170.403 |
| Unsp athscl autol vein bypass of the extrm, bilateral legs                                                                     | 440.31 | 170.403 |
| Unspecified atherosclerosis of autologous vein bypass graft(s) of the extremities, bilateral legs                              |        | 170.403 |
| Unsp athscl autol vein bypass of the extrm, oth extremity                                                                      | 440.31 | 170.408 |
| Atherosclerosis of autologous vein bypass graft of other extremity                                                             | 440.31 | 170.408 |
| Unspecified atherosclerosis of autologous vein bypass graft(s) of the extremities, other extremity                             | 440.31 | 170.408 |
| Atherosclerosis of autologous vein bypass graft of other extremity, with unspecified presence of clinical manifestation        | 440.31 | 170.408 |
| Unspecified atherosclerosis of autologous vein bypass graft(s) of the extremities, other extremity                             |        | 170.408 |
| Atherosclerosis of autologous vein bypass graft of extremities                                                                 | 440.31 | 170.409 |
| Atherosclerosis of autologous vein bypass graft of extremity                                                                   | 440.31 | 170.409 |
| Atherosclerosis of autologous vein bypass graft of limb                                                                        | 440.31 | 170.409 |
| Atherosclerosis of autologous vein bypass graft of lower extremity                                                             | 440.31 | 170.409 |
| Unspecified atherosclerosis of autologous vein bypass graft(s) of the extremities, unspecified extremity                       | 440.31 | 170.409 |

|                                                                                                                                                 |        |         |
|-------------------------------------------------------------------------------------------------------------------------------------------------|--------|---------|
| Atherosclerosis of autologous vein bypass graft of lower extremity, unspecified laterality, with unspecified presence of clinical manifestation | 440.31 | 170.409 |
| Atherosclerosis of autologous vein bypass graft of extremity, unspecified extremity, with unspecified presence of clinical manifestation        | 440.31 | 170.409 |
| Unsp athscl autol vein bypass of the extrm, unsp extremity                                                                                      | 440.31 | 170.409 |
| Unspecified atherosclerosis of autologous vein bypass graft(s) of the extremities, unspecified extremity                                        |        | 170.409 |
| Atherosclerosis of autologous vein bypass graft(s) of the extremities with intermittent claudication                                            |        | 170.41  |
| Atherosclerosis of autologous vein bypass graft of right lower extremity with intermittent claudication                                         | 440.31 | 170.411 |
| Atherosclerosis of autologous vein bypass graft(s) of the extremities with intermittent claudication, right leg                                 | 440.31 | 170.411 |
| Athscl autol vein bypass of extrm w intrmt claud, right leg                                                                                     | 440.31 | 170.411 |
| Atherosclerosis of autologous vein bypass graft(s) of the extremities with intermittent claudication, right leg                                 |        | 170.411 |
| Atherosclerosis of autologous vein bypass graft of left lower extremity with intermittent claudication                                          | 440.31 | 170.412 |
| Atherosclerosis of autologous vein bypass graft(s) of the extremities with intermittent claudication, left leg                                  | 440.31 | 170.412 |
| Athscl autol vein bypass of extrm w intrmt claud, left leg                                                                                      | 440.31 | 170.412 |

|                                                                                                                             |               |         |
|-----------------------------------------------------------------------------------------------------------------------------|---------------|---------|
| Atherosclerosis of autologous vein bypass graft(s) of the extremities with intermittent claudication, left leg              |               | 170.412 |
| Atherosclerosis of autologous vein bypass graft of both lower extremities with intermittent claudication                    | 440.31        | 170.413 |
| Atherosclerosis of autologous vein bypass graft(s) of the extremities with intermittent claudication, bilateral legs        | 440.31        | 170.413 |
| Athsc1 autol vein bypass of extrm w intrmt claud, bi legs                                                                   | 440.31        | 170.413 |
| Atherosclerosis of autologous vein bypass graft(s) of the extremities with intermittent claudication, bilateral legs        |               | 170.413 |
| Athsc1 autol vein bypass of extrm w intrmt claud, oth extrm                                                                 | 440.31        | 170.418 |
| Atherosclerosis of autologous vein bypass graft of other extremity with intermittent claudication                           | 440.31        | 170.418 |
| Atherosclerosis of autologous vein bypass graft(s) of the extremities with intermittent claudication, other extremity       | 440.31        | 170.418 |
| Atherosclerosis of autologous vein bypass graft(s) of the extremities with intermittent claudication, other extremity       |               | 170.418 |
| Atherosclerosis of autologous vein bypass graft of extremity with intermittent claudication                                 | 440.31        | 170.419 |
| Atherosclerosis of autologous vein bypass graft of lower extremity with intermittent claudication                           | 440.31, 443.9 | 170.419 |
| Atherosclerosis of autologous vein bypass graft(s) of the extremities with intermittent claudication, unspecified extremity | 440.31        | 170.419 |

|                                                                                                                             |               |         |
|-----------------------------------------------------------------------------------------------------------------------------|---------------|---------|
| Atherosclerosis of autologous vein bypass graft of lower extremity with intermittent claudication, unspecified laterality   | 440.31, 443.9 | I70.419 |
| Atherosclerosis of autologous vein bypass graft of extremity with intermittent claudication, unspecified extremity          | 440.31        | I70.419 |
| Athscl autol vein bypass of extrm w intrmt claud, unsp extrm                                                                | 440.31        | I70.419 |
| Atherosclerosis of autologous vein bypass graft(s) of the extremities with intermittent claudication, unspecified extremity |               | I70.419 |
| Atherosclerosis of autologous vein bypass graft(s) of the extremities with rest pain                                        |               | I70.42  |
| Atheroscler of autologous vein bypass graft of right leg w/rest pain                                                        | 440.31        | I70.421 |
| Atherosclerosis of autologous vein bypass graft of right lower extremity with rest pain                                     | 440.31        | I70.421 |
| Atherosclerosis of autologous vein bypass graft(s) of the extremities with rest pain, right leg                             | 440.31        | I70.421 |
| Athscl autol vein bypass of the extrm w rest pain, right leg                                                                | 440.31        | I70.421 |
| Atherosclerosis of autologous vein bypass graft(s) of the extremities with rest pain, right leg                             |               | I70.421 |
| Atheroscler of autologous vein bypass graft of left leg with rest pain                                                      | 440.31        | I70.422 |
| Atherosclerosis of autologous vein bypass graft of left lower extremity with rest pain                                      | 440.31        | I70.422 |
| Atherosclerosis of autologous vein bypass graft(s) of the extremities with rest pain, left leg                              | 440.31        | I70.422 |
| Athscl autol vein bypass of the extrm w rest pain, left leg                                                                 | 440.31        | I70.422 |

|                                                                                                             |        |         |
|-------------------------------------------------------------------------------------------------------------|--------|---------|
| Atherosclerosis of autologous vein bypass graft(s) of the extremities with rest pain, left leg              |        | 170.422 |
| Atheroscler of autologous vein bypass graft of both legs w/rest pain                                        | 440.31 | 170.423 |
| Atherosclerosis of autologous vein bypass graft of both lower extremities with rest pain                    | 440.31 | 170.423 |
| Atherosclerosis of autologous vein bypass graft(s) of the extremities with rest pain, bilateral legs        | 440.31 | 170.423 |
| Athsc l autol vein bypass of the extrm w rest pain, bi legs                                                 | 440.31 | 170.423 |
| Atherosclerosis of autologous vein bypass graft(s) of the extremities with rest pain, bilateral legs        |        | 170.423 |
| Athsc l autol vein bypass of the extrm w rest pain, oth extrm                                               | 440.31 | 170.428 |
| Atherosclerosis of autologous vein bypass graft of other extremity with rest pain                           | 440.31 | 170.428 |
| Atherosclerosis of autologous vein bypass graft(s) of the extremities with rest pain, other extremity       | 440.31 | 170.428 |
| Atherosclerosis of autologous vein bypass graft(s) of the extremities with rest pain, other extremity       |        | 170.428 |
| Atheroscler of autologous vein bypass graft of extremity w/rest pain                                        | 440.31 | 170.429 |
| Atherosclerosis of autologous vein bypass graft of extremity with rest pain                                 | 440.31 | 170.429 |
| Atherosclerosis of autologous vein bypass graft of lower extremity with rest pain                           | 440.31 | 170.429 |
| Atherosclerosis of autologous vein bypass graft(s) of the extremities with rest pain, unspecified extremity | 440.31 | 170.429 |

|                                                                                                               |                |                  |
|---------------------------------------------------------------------------------------------------------------|----------------|------------------|
| Atherosclerosis of autologous vein bypass graft of lower extremity with rest pain, unspecified laterality     | 440.31         | I70.429          |
| Atherosclerosis of autologous vein bypass graft of extremity with rest pain, unspecified extremity            | 440.31         | I70.429          |
| Athscl autol vein bypass of extrm w rest pain, unsp extrm                                                     | 440.31         | I70.429          |
| Atherosclerosis of autologous vein bypass graft(s) of the extremities with rest pain, unspecified extremity   |                | I70.429          |
| Atherosclerosis of autologous vein bypass graft(s) of the right leg with ulceration                           |                | I70.43           |
| Atheroscler autologous vein bypass graft right leg w/ulceration thigh                                         | 440.31, 707.11 | I70.431          |
| Atherosclerosis of autologous vein bypass graft of right lower extremity with ulceration of thigh             | 440.31, 707.11 | I70.431          |
| Atherosclerosis of autologous vein bypass graft(s) of the right leg with ulceration of thigh                  | 440.31, 707.11 | I70.431          |
| Athscl autol vein bypass of the right leg w ulcer of thigh                                                    | 440.31, 707.11 | I70.431          |
| Atherosclerosis of autologous vein bypass graft(s) of the right leg with ulceration of thigh                  |                | I70.431          |
| Atherosclerosis of autologous vein bypass graft of both lower extremities with bilateral ulceration of thighs | 440.31, 707.11 | I70.431, I70.441 |
| Atheroscler autologous vein bypass graft right leg w/ulceration calf                                          | 440.31, 707.12 | I70.432          |
| Atherosclerosis of autologous vein bypass graft of right lower extremity with ulceration of calf              | 440.31, 707.12 | I70.432          |
| Atherosclerosis of autologous vein bypass graft(s) of the right leg with ulceration of calf                   | 440.31, 707.12 | I70.432          |

|                                                                                                               |                |                  |
|---------------------------------------------------------------------------------------------------------------|----------------|------------------|
| Athscl autol vein bypass of the right leg w ulcer of calf                                                     | 440.31, 707.12 | 170.432          |
| Atherosclerosis of autologous vein bypass graft(s) of the right leg with ulceration of calf                   |                | 170.432          |
| Atherosclerosis of autologous vein bypass graft of both lower extremities with bilateral ulceration of calves | 440.31, 707.12 | 170.432, 170.442 |
| Atheroscler autologous vein bypass graft right leg w/ulceration ankle                                         | 440.31         | 170.433          |
| Atherosclerosis of autologous vein bypass graft of right lower extremity with ulceration of ankle             | 440.31         | 170.433          |
| Atherosclerosis of autologous vein bypass graft(s) of the right leg with ulceration of ankle                  | 440.31         | 170.433          |
| Athscl autol vein bypass of the right leg w ulcer of ankle                                                    | 440.31         | 170.433          |
| Atherosclerosis of autologous vein bypass graft(s) of the right leg with ulceration of ankle                  |                | 170.433          |
| Atherosclerosis of autologous vein bypass graft of both lower extremities with bilateral ulceration of ankles | 440.31, 707.13 | 170.433, 170.443 |
| Athscl autol vein bypass of r leg w ulcer of heel and midft                                                   | 440.31         | 170.434          |
| Atherosclerosis of autologous vein bypass graft of right lower extremity with ulceration of midfoot           | 440.31, 707.14 | 170.434          |
| Atherosclerosis of autologous vein bypass graft of right lower extremity with ulceration of heel              | 440.31, 707.14 | 170.434          |
| Atherosclerosis of autologous vein bypass graft(s) of the right leg with ulceration of heel and midfoot       | 440.31         | 170.434          |

|                                                                                                                           |                |                  |
|---------------------------------------------------------------------------------------------------------------------------|----------------|------------------|
| Atherosclerosis of autologous vein bypass graft(s) of the right leg with ulceration of heel and midfoot                   |                | 170.434          |
| Atherosclerosis of autologous vein bypass graft of both lower extremities with bilateral ulceration of heels              | 440.31, 707.14 | 170.434, 170.444 |
| Atherosclerosis of autologous vein bypass graft of both lower extremities with bilateral ulceration of midfeet            | 440.31, 707.14 | 170.434, 170.444 |
| Athsc l autol vein bypass of right leg w ulcer oth prt foot                                                               | 440.31         | 170.435          |
| Atherosclerosis of autologous vein bypass graft of right lower extremity with ulceration of other part of foot            | 440.31         | 170.435          |
| Atherosclerosis of autologous vein bypass graft(s) of the right leg with ulceration of other part of foot                 | 440.31         | 170.435          |
| Atherosclerosis of autologous vein bypass graft(s) of the right leg with ulceration of other part of foot                 |                | 170.435          |
| Atherosclerosis of autologous vein bypass graft of both lower extremities with bilateral ulceration of other part of feet | 440.31, 707.15 | 170.435, 170.445 |
| Athsc l autol vein bypass of r leg w ulcer oth prt low leg                                                                | 440.31         | 170.438          |
| Atherosclerosis of autologous vein bypass graft of right lower extremity with ulceration of other part of lower leg       | 440.31         | 170.438          |
| Atherosclerosis of autologous vein bypass graft(s) of the right leg with ulceration of other part of lower leg            | 440.31         | 170.438          |
| Atherosclerosis of autologous vein bypass graft(s) of the right leg with ulceration of other part of lower leg            |                | 170.438          |



|                                                                                                                                  |                |                  |
|----------------------------------------------------------------------------------------------------------------------------------|----------------|------------------|
| Atherosclerosis of autologous vein bypass graft of both lower extremities with bilateral ulceration of other part of lower legs  | 440.31, 707.19 | 170.438, 170.448 |
| Atheroscler of autologous vein bypass graft of right leg w/ulceration                                                            | 440.31, 707.10 | 170.439          |
| Atherosclerosis of autologous vein bypass graft of right lower extremity with ulceration                                         | 440.31, 707.10 | 170.439          |
| Atherosclerosis of autologous vein bypass graft(s) of the right leg with ulceration of unspecified site                          | 440.31, 707.10 | 170.439          |
| Atherosclerosis of autologous vein bypass graft of right lower extremity with ulceration, unspecified ulceration site            | 440.31, 707.10 | 170.439          |
| Athsc1 autol vein bypass of right leg w ulcer of unsp site                                                                       | 440.31, 707.10 | 170.439          |
| Atherosclerosis of autologous vein bypass graft(s) of the right leg with ulceration of unspecified site                          |                | 170.439          |
| Atherosclerosis of autologous vein bypass graft of both lower extremities with bilateral ulceration                              | 440.23, 707.10 | 170.439, 170.449 |
| Atherosclerosis of autologous vein bypass graft of both lower extremities with bilateral ulceration, unspecified ulceration site | 440.23, 707.10 | 170.439, 170.449 |
| Atherosclerosis of autologous vein bypass graft(s) of the left leg with ulceration                                               |                | 170.44           |
| Atheroscler autologous vein bypass graft left leg w/ulceration thigh                                                             | 440.31, 707.11 | 170.441          |
| Atherosclerosis of autologous vein bypass graft of left lower extremity with ulceration of thigh                                 | 440.31, 707.11 | 170.441          |
| Atherosclerosis of autologous vein bypass graft(s) of the left leg with ulceration of thigh                                      | 440.31, 707.11 | 170.441          |

|                                                                                                    |                |         |
|----------------------------------------------------------------------------------------------------|----------------|---------|
| Athscl autol vein bypass of the left leg w ulcer of thigh                                          | 440.31, 707.11 | 170.441 |
| Atherosclerosis of autologous vein bypass graft(s) of the left leg with ulceration of thigh        |                | 170.441 |
| Atheroscler autologous vein bypass graft left leg w/ulceration calf                                | 440.31, 707.12 | 170.442 |
| Atherosclerosis of autologous vein bypass graft of left lower extremity with ulceration of calf    | 440.31, 707.12 | 170.442 |
| Atherosclerosis of autologous vein bypass graft(s) of the left leg with ulceration of calf         | 440.31, 707.12 | 170.442 |
| Athscl autol vein bypass of the left leg w ulcer of calf                                           | 440.31, 707.12 | 170.442 |
| Atherosclerosis of autologous vein bypass graft(s) of the left leg with ulceration of calf         |                | 170.442 |
| Atheroscler autologous vein bypass graft left leg w/ulceration ankle                               | 440.31, 707.13 | 170.443 |
| Atherosclerosis of autologous vein bypass graft of left lower extremity with ulceration of ankle   | 440.31, 707.13 | 170.443 |
| Atherosclerosis of autologous vein bypass graft(s) of the left leg with ulceration of ankle        | 440.31, 707.13 | 170.443 |
| Athscl autol vein bypass of the left leg w ulcer of ankle                                          | 440.31, 707.13 | 170.443 |
| Atherosclerosis of autologous vein bypass graft(s) of the left leg with ulceration of ankle        |                | 170.443 |
| Athscl autol vein bypass of left leg w ulc of heel and midft                                       | 440.31         | 170.444 |
| Atherosclerosis of autologous vein bypass graft of left lower extremity with ulceration of midfoot | 440.31, 707.14 | 170.444 |

|                                                                                                                    |                |         |
|--------------------------------------------------------------------------------------------------------------------|----------------|---------|
| Atherosclerosis of autologous vein bypass graft of left lower extremity with ulceration of heel                    | 440.31, 707.14 | 170.444 |
| Atherosclerosis of autologous vein bypass graft(s) of the left leg with ulceration of heel and midfoot             | 440.31         | 170.444 |
| Atherosclerosis of autologous vein bypass graft(s) of the left leg with ulceration of heel and midfoot             |                | 170.444 |
| Athsc1 autol vein bypass of left leg w ulcer oth prt foot                                                          | 440.31         | 170.445 |
| Atherosclerosis of autologous vein bypass graft of left lower extremity with ulceration of other part of foot      | 440.31         | 170.445 |
| Atherosclerosis of autologous vein bypass graft(s) of the left leg with ulceration of other part of foot           | 440.31         | 170.445 |
| Atherosclerosis of autologous vein bypass graft(s) of the left leg with ulceration of other part of foot           |                | 170.445 |
| Athsc1 autol vein bypass of left leg w ulcer oth prt low leg                                                       | 440.31         | 170.448 |
| Atherosclerosis of autologous vein bypass graft of left lower extremity with ulceration of other part of lower leg | 440.31         | 170.448 |
| Atherosclerosis of autologous vein bypass graft(s) of the left leg with ulceration of other part of lower leg      | 440.31         | 170.448 |
| Atherosclerosis of autologous vein bypass graft(s) of the left leg with ulceration of other part of lower leg      |                | 170.448 |
| Atheroscler of autologous vein bypass graft of left leg w/ulceration                                               | 440.31, 707.10 | 170.449 |
| Atherosclerosis of autologous vein bypass graft of left lower extremity with ulceration                            | 440.31, 707.10 | 170.449 |

|                                                                                                                      |                |         |
|----------------------------------------------------------------------------------------------------------------------|----------------|---------|
| Atherosclerosis of autologous vein bypass graft(s) of the left leg with ulceration of unspecified site               | 440.31, 707.10 | 170.449 |
| Atherosclerosis of autologous vein bypass graft of left lower extremity with ulceration, unspecified ulceration site | 440.31, 707.10 | 170.449 |
| Ath scl autol vein bypass of left leg w ulcer of unsp site                                                           | 440.31, 707.10 | 170.449 |
| Atherosclerosis of autologous vein bypass graft(s) of the left leg with ulceration of unspecified site               |                | 170.449 |
| Ath scl autologous vein bypass of extremity w ulceration                                                             | 440.31, 707.9  | 170.45  |
| Atherosclerosis of autologous vein bypass graft of lower extremity with ulceration                                   | 440.31, 707.10 | 170.45  |
| Atherosclerosis of autologous vein bypass graft of lower extremity with ulceration of heel                           | 440.31, 707.14 | 170.45  |
| Atherosclerosis of autologous vein bypass graft of lower extremity with ulceration of ankle                          | 440.31, 707.13 | 170.45  |
| Atherosclerosis of autologous vein bypass graft of lower extremity with ulceration of thigh                          | 440.31, 707.11 | 170.45  |
| Atherosclerosis of autologous vein bypass graft of lower extremity with ulceration of midfoot                        | 440.31, 707.14 | 170.45  |
| Atherosclerosis of autologous vein bypass graft of lower extremity with ulceration of calf                           | 440.31, 707.12 | 170.45  |
| Atherosclerosis of autologous vein bypass graft of extremity with ulceration                                         | 440.31, 707.9  | 170.45  |
| Atherosclerosis of autologous vein bypass graft of other extremity with ulceration                                   | 440.31         | 170.45  |
| Atherosclerosis of autologous vein bypass graft(s) of other extremity with ulceration                                | 440.31         | 170.45  |

|                                                                                                                                         |                |        |
|-----------------------------------------------------------------------------------------------------------------------------------------|----------------|--------|
| Atherosclerosis of autologous vein bypass graft of lower extremity with ulceration of other part of lower leg                           | 440.31, 707.19 | 170.45 |
| Atherosclerosis of autologous vein bypass graft of lower extremity with ulceration of other part of foot                                | 440.31, 707.15 | 170.45 |
| Atherosclerosis of autologous vein bypass graft of lower extremity with ulceration, unspecified laterality, unspecified ulceration site | 440.31, 707.10 | 170.45 |
| Atherosclerosis of autologous vein bypass graft of lower extremity with ulceration of heel, unspecified laterality                      | 440.31, 707.14 | 170.45 |
| Atherosclerosis of autologous vein bypass graft of lower extremity with ulceration of other part of foot, unspecified laterality        | 440.31, 707.15 | 170.45 |
| Atherosclerosis of autologous vein bypass graft of lower extremity with ulceration of calf, unspecified laterality                      | 440.31, 707.12 | 170.45 |
| Atherosclerosis of autologous vein bypass graft of lower extremity with ulceration of ankle, unspecified laterality                     | 440.31, 707.13 | 170.45 |
| Atherosclerosis of autologous vein bypass graft of lower extremity with ulceration of midfoot, unspecified laterality                   | 440.31, 707.14 | 170.45 |
| Atherosclerosis of autologous vein bypass graft of lower extremity with ulceration of other part of lower leg, unspecified laterality   | 440.31, 707.19 | 170.45 |
| Atherosclerosis of autologous vein bypass graft of lower extremity with ulceration of thigh, unspecified laterality                     | 440.31, 707.11 | 170.45 |
| Atherosclerosis of autologous vein bypass graft of extremity with ulceration, unspecified extremity                                     | 440.31, 707.9  | 170.45 |
| Atherosclerosis of autologous vein bypass graft(s) of other extremity with ulceration                                                   |                | 170.45 |

|                                                                                                     |               |         |
|-----------------------------------------------------------------------------------------------------|---------------|---------|
| Atherosclerosis of autologous vein bypass graft(s) of the extremities with gangrene                 |               | 170.46  |
| Atheroscler of autologous vein bypass graft of right leg with gangrene                              | 440.31        | 170.461 |
| Atherosclerosis of autologous vein bypass graft of right lower extremity with gangrene              | 440.31        | 170.461 |
| Atherosclerosis of autologous vein bypass graft(s) of the extremities with gangrene, right leg      | 440.31        | 170.461 |
| Athsc l autol vein bypass of the extrm w gangrene, right leg                                        | 440.31        | 170.461 |
| Atherosclerosis of autologous vein bypass graft(s) of the extremities with gangrene, right leg      |               | 170.461 |
| Atheroscler of autologous vein bypass graft of left leg with gangrene                               | 440.31, 785.4 | 170.462 |
| Atherosclerosis of autologous vein bypass graft of left lower extremity with gangrene               | 440.31, 785.4 | 170.462 |
| Atherosclerosis of autologous vein bypass graft(s) of the extremities with gangrene, left leg       | 440.31, 785.4 | 170.462 |
| Athsc l autol vein bypass of the extrm w gangrene, left leg                                         | 440.31, 785.4 | 170.462 |
| Atherosclerosis of autologous vein bypass graft(s) of the extremities with gangrene, left leg       |               | 170.462 |
| Atheroscler of autologous vein bypass graft of both legs with gangrene                              | 440.31        | 170.463 |
| Atherosclerosis of autologous vein bypass graft of both lower extremities with gangrene             | 440.31        | 170.463 |
| Atherosclerosis of autologous vein bypass graft(s) of the extremities with gangrene, bilateral legs | 440.31        | 170.463 |
| Athsc l autol vein bypass of the extrm w gangrene, bi legs                                          | 440.31        | 170.463 |

|                                                                                                            |               |         |
|------------------------------------------------------------------------------------------------------------|---------------|---------|
| Atherosclerosis of autologous vein bypass graft(s) of the extremities with gangrene, bilateral legs        |               | 170.463 |
| Athscl autol vein bypass of the extrm w gangrene, oth extrm                                                | 440.31        | 170.468 |
| Atherosclerosis of autologous vein bypass graft of other extremity with gangrene                           | 440.31        | 170.468 |
| Atherosclerosis of autologous vein bypass graft(s) of the extremities with gangrene, other extremity       | 440.31        | 170.468 |
| Atherosclerosis of autologous vein bypass graft(s) of the extremities with gangrene, other extremity       |               | 170.468 |
| Atheroscler of autologous vein bypass graft of extremity with gangrene                                     | 440.31, 785.4 | 170.469 |
| Atherosclerosis of autologous vein bypass graft of extremity with gangrene                                 | 440.31, 785.4 | 170.469 |
| Atherosclerosis of autologous vein bypass graft of lower extremity with gangrene                           | 440.31, 785.4 | 170.469 |
| Atherosclerosis of autologous vein bypass graft(s) of the extremities with gangrene, unspecified extremity | 440.31, 785.4 | 170.469 |
| Atherosclerosis of autologous vein bypass graft of lower extremity with gangrene, unspecified laterality   | 440.31, 785.4 | 170.469 |
| Atherosclerosis of autologous vein bypass graft of extremity with gangrene, unspecified extremity          | 440.31, 785.4 | 170.469 |
| Athscl autol vein bypass of the extrm w gangrene, unsp extrm                                               | 440.31, 785.4 | 170.469 |
| Atherosclerosis of autologous vein bypass graft(s) of the extremities with gangrene, unspecified extremity |               | 170.469 |
| Other atherosclerosis of autologous vein bypass graft(s) of the extremities                                |               | 170.49  |
| Oth athscl autologous vein bypass of the extrm, right leg                                                  | 440.31        | 170.491 |

|                                                                                                             |        |         |
|-------------------------------------------------------------------------------------------------------------|--------|---------|
| Other atherosclerosis of autologous vein bypass graft(s) of the extremities, right leg                      | 440.31 | 170.491 |
| Atherosclerosis of autologous vein bypass graft of right lower extremity with other clinical manifestation  | 440.31 | 170.491 |
| Other atherosclerosis of autologous vein bypass graft(s) of the extremities, right leg                      |        | 170.491 |
| Oth athscl autologous vein bypass of the extrm, left leg                                                    | 440.31 | 170.492 |
| Other atherosclerosis of autologous vein bypass graft(s) of the extremities, left leg                       | 440.31 | 170.492 |
| Atherosclerosis of autologous vein bypass graft of left lower extremity with other clinical manifestation   | 440.31 | 170.492 |
| Other atherosclerosis of autologous vein bypass graft(s) of the extremities, left leg                       |        | 170.492 |
| Oth athscl autol vein bypass of the extrm, bilateral legs                                                   | 440.31 | 170.493 |
| Other atherosclerosis of autologous vein bypass graft(s) of the extremities, bilateral legs                 | 440.31 | 170.493 |
| Atherosclerosis of autologous vein bypass graft of both lower extremities with other clinical manifestation | 440.31 | 170.493 |
| Other atherosclerosis of autologous vein bypass graft(s) of the extremities, bilateral legs                 |        | 170.493 |
| Oth athscl autol vein bypass of the extrm, oth extremity                                                    | 440.31 | 170.498 |
| Other atherosclerosis of autologous vein bypass graft(s) of the extremities, other extremity                | 440.31 | 170.498 |
| Atherosclerosis of autologous vein bypass graft of other extremity with other clinical manifestation        | 440.31 | 170.498 |



|                                                                                                                              |        |         |
|------------------------------------------------------------------------------------------------------------------------------|--------|---------|
| Other atherosclerosis of autologous vein bypass graft(s) of the extremities, other extremity                                 |        | 170.498 |
| Oth athscl autol vein bypass of the extrm, unsp extremity                                                                    | 440.31 | 170.499 |
| Other atherosclerosis of autologous vein bypass graft(s) of the extremities, unspecified extremity                           | 440.31 | 170.499 |
| Atherosclerosis of autologous vein bypass graft of extremity with other clinical manifestation                               | 440.31 | 170.499 |
| Atherosclerosis of autologous vein bypass graft of lower extremity with other clinical manifestation                         | 440.31 | 170.499 |
| Atherosclerosis of autologous vein bypass graft of lower extremity with other clinical manifestation, unspecified laterality | 440.31 | 170.499 |
| Atherosclerosis of autologous vein bypass graft of extremity with other clinical manifestation, unspecified extremity        | 440.31 | 170.499 |
| Other atherosclerosis of autologous vein bypass graft(s) of the extremities, unspecified extremity                           |        | 170.499 |
| Atherosclerosis of nonautologous biological bypass graft(s) of the extremities                                               |        | 170.5   |
| Unspecified atherosclerosis of nonautologous biological bypass graft(s) of the extremities                                   |        | 170.50  |
| Atherosclerosis of nonautologous biological bypass graft of right leg                                                        | 440.32 | 170.501 |
| Atherosclerosis of nonautologous biological bypass graft of right lower extremity                                            | 440.32 | 170.501 |
| Unspecified atherosclerosis of nonautologous biological bypass graft(s) of the extremities, right leg                        | 440.32 | 170.501 |

|                                                                                                                                         |        |         |
|-----------------------------------------------------------------------------------------------------------------------------------------|--------|---------|
| Atherosclerosis of nonautologous biological bypass graft of right lower extremity, with unspecified presence of clinical manifestation  | 440.32 | 170.501 |
| Unsp athscl nonaut bio bypass of the extremities, right leg                                                                             | 440.32 | 170.501 |
| Unspecified atherosclerosis of nonautologous biological bypass graft(s) of the extremities, right leg                                   |        | 170.501 |
| Atherosclerosis of nonautologous biological bypass graft of left leg                                                                    | 440.32 | 170.502 |
| Atherosclerosis of nonautologous biological bypass graft of left lower extremity                                                        | 440.32 | 170.502 |
| Unspecified atherosclerosis of nonautologous biological bypass graft(s) of the extremities, left leg                                    | 440.32 | 170.502 |
| Atherosclerosis of nonautologous biological bypass graft of left lower extremity, with unspecified presence of clinical manifestation   | 440.32 | 170.502 |
| Unsp athscl nonaut bio bypass of the extremities, left leg                                                                              | 440.32 | 170.502 |
| Unspecified atherosclerosis of nonautologous biological bypass graft(s) of the extremities, left leg                                    |        | 170.502 |
| Atherosclerosis of nonautologous biological bypass graft of both legs                                                                   | 440.32 | 170.503 |
| Atherosclerosis of nonautologous biological bypass graft of both lower extremities                                                      | 440.32 | 170.503 |
| Unspecified atherosclerosis of nonautologous biological bypass graft(s) of the extremities, bilateral legs                              | 440.32 | 170.503 |
| Atherosclerosis of nonautologous biological bypass graft of both lower extremities, with unspecified presence of clinical manifestation | 440.32 | 170.503 |

|                                                                                                                                                          |        |         |
|----------------------------------------------------------------------------------------------------------------------------------------------------------|--------|---------|
| Unsp athscl nonaut bio bypass of the extrm, bilateral legs                                                                                               | 440.32 | 170.503 |
| Unspecified atherosclerosis of nonautologous biological bypass graft(s) of the extremities, bilateral legs                                               |        | 170.503 |
| Unsp athscl nonaut bio bypass of the extrm, oth extremity                                                                                                | 440.32 | 170.508 |
| Atherosclerosis of nonautologous biological bypass graft of other extremity                                                                              | 440.32 | 170.508 |
| Unspecified atherosclerosis of nonautologous biological bypass graft(s) of the extremities, other extremity                                              | 440.32 | 170.508 |
| Atherosclerosis of nonautologous biological bypass graft of other extremity, with unspecified presence of clinical manifestation                         | 440.32 | 170.508 |
| Unspecified atherosclerosis of nonautologous biological bypass graft(s) of the extremities, other extremity                                              |        | 170.508 |
| Atherosclerosis of nonautologous biological bypass graft of extremities                                                                                  | 440.32 | 170.509 |
| Extremity atherosclerosis nonautologous biologic bypass graft                                                                                            | 440.32 | 170.509 |
| Atherosclerosis of nonautologous biological bypass graft of extremity                                                                                    | 440.32 | 170.509 |
| Athrscl nonauto gft extr                                                                                                                                 | 440.32 | 170.509 |
| Atherosclerosis of nonautologous biological bypass graft of lower extremity                                                                              | 440.32 | 170.509 |
| Unspecified atherosclerosis of nonautologous biological bypass graft(s) of the extremities, unspecified extremity                                        | 440.32 | 170.509 |
| Atherosclerosis of nonautologous biological bypass graft of lower extremity, unspecified laterality, with unspecified presence of clinical manifestation | 440.32 | 170.509 |

|                                                                                                                                                   |        |         |
|---------------------------------------------------------------------------------------------------------------------------------------------------|--------|---------|
| Atherosclerosis of nonautologous biological bypass graft of extremity, unspecified extremity, with unspecified presence of clinical manifestation | 440.32 | 170.509 |
| Unsp athscl nonaut bio bypass of the extrm, unsp extremity                                                                                        | 440.32 | 170.509 |
| Unspecified atherosclerosis of nonautologous biological bypass graft(s) of the extremities, unspecified extremity                                 |        | 170.509 |
| Atherosclerosis of nonautologous biological bypass graft(s) of the extremities intermittent claudication                                          |        | 170.51  |
| Atherosclerosis of nonautologous biological bypass graft of right lower extremity with intermittent claudication                                  | 440.32 | 170.511 |
| Atherosclerosis of nonautologous biological bypass graft(s) of the extremities with intermittent claudication, right leg                          | 440.32 | 170.511 |
| Athscl nonaut bio bypass of extrm w intrmt claud, right leg                                                                                       | 440.32 | 170.511 |
| Atherosclerosis of nonautologous biological bypass graft(s) of the extremities with intermittent claudication, right leg                          |        | 170.511 |
| Atherosclerosis of nonautologous biological bypass graft of left lower extremity with intermittent claudication                                   | 440.32 | 170.512 |
| Atherosclerosis of nonautologous biological bypass graft(s) of the extremities with intermittent claudication, left leg                           | 440.32 | 170.512 |
| Athscl nonaut bio bypass of extrm w intrmt claud, left leg                                                                                        | 440.32 | 170.512 |
| Atherosclerosis of nonautologous biological bypass graft(s) of the extremities with intermittent claudication, left leg                           |        | 170.512 |

|                                                                                                                                      |               |         |
|--------------------------------------------------------------------------------------------------------------------------------------|---------------|---------|
| Atherosclerosis of nonautologous biological bypass graft of both lower extremities with intermittent claudication                    | 440.32        | I70.513 |
| Atherosclerosis of nonautologous biological bypass graft(s) of the extremities with intermittent claudication, bilateral legs        | 440.32        | I70.513 |
| Athscl nonaut bio bypass of extrm w intrmt claud, bi legs                                                                            | 440.32        | I70.513 |
| Atherosclerosis of nonautologous biological bypass graft(s) of the extremities with intermittent claudication, bilateral legs        |               | I70.513 |
| Athscl nonaut bio bypass of extrm w intrmt claud, oth extrm                                                                          | 440.32        | I70.518 |
| Atherosclerosis of nonautologous biological bypass graft of other extremity with intermittent claudication                           | 440.32        | I70.518 |
| Atherosclerosis of nonautologous biological bypass graft(s) of the extremities with intermittent claudication, other extremity       | 440.32        | I70.518 |
| Atherosclerosis of nonautologous biological bypass graft(s) of the extremities with intermittent claudication, other extremity       |               | I70.518 |
| Atherosclerosis of nonautologous biological bypass graft of extremity with intermittent claudication                                 | 440.32        | I70.519 |
| Atherosclerosis of nonautologous biological bypass graft of lower extremity with intermittent claudication                           | 440.32, 443.9 | I70.519 |
| Atherosclerosis of nonautologous biological bypass graft(s) of the extremities with intermittent claudication, unspecified extremity | 440.32        | I70.519 |

|                                                                                                                                      |               |         |
|--------------------------------------------------------------------------------------------------------------------------------------|---------------|---------|
| Atherosclerosis of nonautologous biological bypass graft of lower extremity with intermittent claudication, unspecified laterality   | 440.32, 443.9 | 170.519 |
| Atherosclerosis of nonautologous biological bypass graft of extremity with intermittent claudication, unspecified extremity          | 440.32        | 170.519 |
| Athsc l nonaut bio bypass of extrm w intrmt claud, unsp extrm                                                                        | 440.32        | 170.519 |
| Atherosclerosis of nonautologous biological bypass graft(s) of the extremities with intermittent claudication, unspecified extremity |               | 170.519 |
| Atherosclerosis of nonautologous biological bypass graft(s) of the extremities with rest pain                                        |               | 170.52  |
| Atheroscler nonautolg biological bypass graft right leg w/rest pain                                                                  | 440.32        | 170.521 |
| Atherosclerosis of nonautologous biological bypass graft of right lower extremity with rest pain                                     | 440.32        | 170.521 |
| Atherosclerosis of nonautologous biological bypass graft(s) of the extremities with rest pain, right leg                             | 440.32        | 170.521 |
| Athsc l nonaut bio bypass of the extrm w rest pain, right leg                                                                        | 440.32        | 170.521 |
| Atherosclerosis of nonautologous biological bypass graft(s) of the extremities with rest pain, right leg                             |               | 170.521 |
| Atheroscler nonautolg biological bypass graft left leg w/rest pain                                                                   | 440.32        | 170.522 |
| Atherosclerosis of nonautologous biological bypass graft of left lower extremity with rest pain                                      | 440.32        | 170.522 |
| Atherosclerosis of nonautologous biological bypass graft(s) of the extremities with rest pain, left leg                              | 440.32        | 170.522 |

|                                                                                                                |        |         |
|----------------------------------------------------------------------------------------------------------------|--------|---------|
| Athscl nonaut bio bypass of the extrm w rest pain, left leg                                                    | 440.32 | 170.522 |
| Atherosclerosis of nonautologous biological bypass graft(s) of the extremities with rest pain, left leg        |        | 170.522 |
| Atheroscler nonautolg biological bypass graft both legs w/rest pain                                            | 440.32 | 170.523 |
| Atherosclerosis of nonautologous biological bypass graft of both lower extremities with rest pain              | 440.32 | 170.523 |
| Atherosclerosis of nonautologous biological bypass graft(s) of the extremities with rest pain, bilateral legs  | 440.32 | 170.523 |
| Athscl nonaut bio bypass of the extrm w rest pain, bi legs                                                     | 440.32 | 170.523 |
| Atherosclerosis of nonautologous biological bypass graft(s) of the extremities with rest pain, bilateral legs  |        | 170.523 |
| Athscl nonaut bio bypass of the extrm w rest pain, oth extrm                                                   | 440.32 | 170.528 |
| Atherosclerosis of nonautologous biological bypass graft of other extremity with rest pain                     | 440.32 | 170.528 |
| Atherosclerosis of nonautologous biological bypass graft(s) of the extremities with rest pain, other extremity | 440.32 | 170.528 |
| Atherosclerosis of nonautologous biological bypass graft(s) of the extremities with rest pain, other extremity |        | 170.528 |
| Atheroscler nonautolg biological bypass graft extremity w/rest pain                                            | 440.32 | 170.529 |
| Atherosclerosis of nonautologous biological bypass graft of extremity with rest pain                           | 440.32 | 170.529 |
| Atherosclerosis of nonautologous biological bypass graft of lower extremity with rest pain                     | 440.32 | 170.529 |

|                                                                                                                        |                |                  |
|------------------------------------------------------------------------------------------------------------------------|----------------|------------------|
| Atherosclerosis of nonautologous biological bypass graft(s) of the extremities with rest pain, unspecified extremity   | 440.32         | I70.529          |
| Atherosclerosis of nonautologous biological bypass graft of lower extremity with rest pain, unspecified laterality     | 440.32         | I70.529          |
| Atherosclerosis of nonautologous biological bypass graft of extremity with rest pain, unspecified extremity            | 440.32         | I70.529          |
| Athscl nonaut bio bypass of extrm w rest pain, unsp extrm                                                              | 440.32         | I70.529          |
| Atherosclerosis of nonautologous biological bypass graft(s) of the extremities with rest pain, unspecified extremity   |                | I70.529          |
| Atherosclerosis of nonautologous biological bypass graft(s) of the right leg with ulceration                           |                | I70.53           |
| Atherosclerosis of nonautologous biological bypass graft of right lower extremity with ulceration of thigh             | 440.32         | I70.531          |
| Atherosclerosis of nonautologous biological bypass graft(s) of the right leg with ulceration of thigh                  | 440.32         | I70.531          |
| Athscl nonaut bio bypass of the right leg w ulcer of thigh                                                             | 440.32         | I70.531          |
| Atherosclerosis of nonautologous biological bypass graft(s) of the right leg with ulceration of thigh                  |                | I70.531          |
| Atherosclerosis of nonautologous biological bypass graft of both lower extremities with bilateral ulceration of thighs | 440.32, 707.11 | I70.531, I70.541 |
| Atherosclerosis of nonautologous biological bypass graft of right lower extremity with ulceration of calf              | 440.32         | I70.532          |



|                                                                                                                        |                |                  |
|------------------------------------------------------------------------------------------------------------------------|----------------|------------------|
| Atherosclerosis of nonautologous biological bypass graft(s) of the right leg with ulceration of calf                   | 440.32         | 170.532          |
| Athscl nonaut bio bypass of the right leg w ulcer of calf                                                              | 440.32         | 170.532          |
| Atherosclerosis of nonautologous biological bypass graft(s) of the right leg with ulceration of calf                   |                | 170.532          |
| Atherosclerosis of nonautologous biological bypass graft of both lower extremities with bilateral ulceration of calves | 440.32, 707.12 | 170.532, 170.542 |
| Atherosclerosis of nonautologous biological bypass graft of right lower extremity with ulceration of ankle             | 440.32         | 170.533          |
| Atherosclerosis of nonautologous biological bypass graft(s) of the right leg with ulceration of ankle                  | 440.32         | 170.533          |
| Athscl nonaut bio bypass of the right leg w ulcer of ankle                                                             | 440.32         | 170.533          |
| Atherosclerosis of nonautologous biological bypass graft(s) of the right leg with ulceration of ankle                  |                | 170.533          |
| Atherosclerosis of nonautologous biological bypass graft of both lower extremities with bilateral ulceration of ankles | 440.32, 707.13 | 170.533, 170.543 |
| Athscl nonaut bio bypass of r leg w ulcer of heel and midft                                                            | 440.32         | 170.534          |
| Atherosclerosis of nonautologous biological bypass graft of right lower extremity with ulceration of heel              | 440.32, 707.14 | 170.534          |
| Atherosclerosis of nonautologous biological bypass graft of right lower extremity with ulceration of midfoot           | 440.32, 707.14 | 170.534          |
| Atherosclerosis of nonautologous biological bypass graft(s) of the right leg with ulceration of heel and midfoot       | 440.32         | 170.534          |

|                                                                                                                                    |                |                  |
|------------------------------------------------------------------------------------------------------------------------------------|----------------|------------------|
| Atherosclerosis of nonautologous biological bypass graft(s) of the right leg with ulceration of heel and midfoot                   |                | 170.534          |
| Atherosclerosis of nonautologous biological bypass graft of both lower extremities with bilateral ulceration of midfeet            | 440.32, 707.14 | 170.534, 170.544 |
| Atherosclerosis of nonautologous biological bypass graft of both lower extremities with bilateral ulceration of heels              | 440.32, 707.14 | 170.534, 170.544 |
| Athscl nonaut bio bypass of right leg w ulcer oth prt foot                                                                         | 440.32         | 170.535          |
| Atherosclerosis of nonautologous biological bypass graft of right lower extremity with ulceration of other part of foot            | 440.32         | 170.535          |
| Atherosclerosis of nonautologous biological bypass graft(s) of the right leg with ulceration of other part of foot                 | 440.32         | 170.535          |
| Atherosclerosis of nonautologous biological bypass graft(s) of the right leg with ulceration of other part of foot                 |                | 170.535          |
| Atherosclerosis of nonautologous biological bypass graft of both lower extremities with bilateral ulceration of other part of feet | 440.32, 707.15 | 170.535, 170.545 |
| Athscl nonaut bio bypass of r leg w ulcer oth prt low leg                                                                          | 440.32         | 170.538          |
| Atherosclerosis of nonautologous biological bypass graft of right lower extremity with ulceration of other part of lower leg       | 440.32         | 170.538          |
| Atherosclerosis of nonautologous biological bypass graft(s) of the right leg with ulceration of other part of lower leg            | 440.32         | 170.538          |
| Atherosclerosis of nonautologous biological bypass graft(s) of the right leg with ulceration of other part of lower leg            |                | 170.538          |

|                                                                                                                                           |                |                  |
|-------------------------------------------------------------------------------------------------------------------------------------------|----------------|------------------|
| Atherosclerosis of nonautologous biological bypass graft of both lower extremities with bilateral ulceration of other part of lower leg   | 440.32, 707.19 | 170.538, 170.548 |
| Atheroscler nonautolg biological bypass graft right leg w/ulceration                                                                      | 440.32         | 170.539          |
| Atherosclerosis of nonautologous biological bypass graft of right lower extremity with ulceration                                         | 440.32         | 170.539          |
| Atherosclerosis of nonautologous biological bypass graft(s) of the right leg with ulceration of unspecified site                          | 440.32         | 170.539          |
| Atherosclerosis of nonautologous biological bypass graft of right lower extremity with ulceration, unspecified ulceration site            | 440.32         | 170.539          |
| Athscl nonaut bio bypass of right leg w ulcer of unsp site                                                                                | 440.32         | 170.539          |
| Atherosclerosis of nonautologous biological bypass graft(s) of the right leg with ulceration of unspecified site                          |                | 170.539          |
| Atherosclerosis of nonautologous biological bypass graft of both lower extremities with bilateral ulceration                              | 440.32, 707.10 | 170.539, 170.549 |
| Atherosclerosis of nonautologous biological bypass graft of both lower extremities with bilateral ulceration, unspecified ulceration site | 440.32, 707.10 | 170.539, 170.549 |
| Atherosclerosis of nonautologous biological bypass graft(s) of the left leg with ulceration                                               |                | 170.54           |
| Atherosclerosis of nonautologous biological bypass graft of left lower extremity with ulceration of thigh                                 | 440.32         | 170.541          |
| Atherosclerosis of nonautologous biological bypass graft(s) of the left leg with ulceration of thigh                                      | 440.32         | 170.541          |

|                                                                                                             |                |         |
|-------------------------------------------------------------------------------------------------------------|----------------|---------|
| Athscl nonaut bio bypass of the left leg w ulcer of thigh                                                   | 440.32         | 170.541 |
| Atherosclerosis of nonautologous biological bypass graft(s) of the left leg with ulceration of thigh        |                | 170.541 |
| Atherosclerosis of nonautologous biological bypass graft of left lower extremity with ulceration of calf    | 440.32         | 170.542 |
| Atherosclerosis of nonautologous biological bypass graft(s) of the left leg with ulceration of calf         | 440.32         | 170.542 |
| Athscl nonaut bio bypass of the left leg w ulcer of calf                                                    | 440.32         | 170.542 |
| Atherosclerosis of nonautologous biological bypass graft(s) of the left leg with ulceration of calf         |                | 170.542 |
| Atherosclerosis of nonautologous biological bypass graft of left lower extremity with ulceration of ankle   | 440.32         | 170.543 |
| Atherosclerosis of nonautologous biological bypass graft(s) of the left leg with ulceration of ankle        | 440.32         | 170.543 |
| Athscl nonaut bio bypass of the left leg w ulcer of ankle                                                   | 440.32         | 170.543 |
| Atherosclerosis of nonautologous biological bypass graft(s) of the left leg with ulceration of ankle        |                | 170.543 |
| Athscl nonaut bio bypass of left leg w ulc of heel and midft                                                | 440.32         | 170.544 |
| Atherosclerosis of nonautologous biological bypass graft of left lower extremity with ulceration of midfoot | 440.32, 707.14 | 170.544 |
| Atherosclerosis of nonautologous biological bypass graft of left lower extremity with ulceration of heel    | 440.32, 707.14 | 170.544 |

|                                                                                                                             |               |         |
|-----------------------------------------------------------------------------------------------------------------------------|---------------|---------|
| Atherosclerosis of nonautologous biological bypass graft(s) of the left leg with ulceration of heel and midfoot             | 440.32        | 170.544 |
| Atherosclerosis of nonautologous biological bypass graft(s) of the left leg with ulceration of heel and midfoot             |               | 170.544 |
| Athscl nonaut bio bypass of left leg w ulcer oth prt foot                                                                   | 440.32        | 170.545 |
| Atherosclerosis of nonautologous biological bypass graft of left lower extremity with ulceration of other part of foot      | 440.32        | 170.545 |
| Atherosclerosis of nonautologous biological bypass graft(s) of the left leg with ulceration of other part of foot           | 440.32        | 170.545 |
| Atherosclerosis of nonautologous biological bypass graft(s) of the left leg with ulceration of other part of foot           |               | 170.545 |
| Athscl nonaut bio bypass of left leg w ulcer oth prt low leg                                                                | 440.32        | 170.548 |
| Atherosclerosis of nonautologous biological bypass graft of left lower extremity with ulceration of other part of lower leg | 440.32        | 170.548 |
| Atherosclerosis of nonautologous biological bypass graft(s) of the left leg with ulceration of other part of lower leg      | 440.32        | 170.548 |
| Atherosclerosis of nonautologous biological bypass graft(s) of the left leg with ulceration of other part of lower leg      |               | 170.548 |
| Atheroscler nonautolg biological bypass graft left leg w/ulceration                                                         | 440.32, 707.9 | 170.549 |
| Atherosclerosis of nonautologous biological bypass graft of left lower extremity with ulceration                            | 440.32, 707.9 | 170.549 |
| Atherosclerosis of nonautologous biological bypass graft(s) of the left leg with ulceration of unspecified site             | 440.32, 707.9 | 170.549 |

|                                                                                                                               |                |         |
|-------------------------------------------------------------------------------------------------------------------------------|----------------|---------|
| Atherosclerosis of nonautologous biological bypass graft of left lower extremity with ulceration, unspecified ulceration site | 440.32, 707.9  | 170.549 |
| Athscl nonaut bio bypass of left leg w ulcer of unsp site                                                                     | 440.32, 707.9  | 170.549 |
| Atherosclerosis of nonautologous biological bypass graft(s) of the left leg with ulceration of unspecified site               |                | 170.549 |
| Athscl nonautologous bio bypass of extremity w ulceration                                                                     | 440.32, 707.9  | 170.55  |
| Atherosclerosis of nonautologous biological bypass graft of lower extremity with ulceration of calf                           | 440.32, 707.12 | 170.55  |
| Atherosclerosis of nonautologous biological bypass graft of lower extremity with ulceration of ankle                          | 440.32, 707.13 | 170.55  |
| Atherosclerosis of nonautologous biological bypass graft of lower extremity with ulceration                                   | 440.32, 707.10 | 170.55  |
| Atherosclerosis of nonautologous biological bypass graft of lower extremity with ulceration of heel                           | 440.32, 707.14 | 170.55  |
| Atherosclerosis of nonautologous biological bypass graft of lower extremity with ulceration of midfoot                        | 440.32, 707.14 | 170.55  |
| Atherosclerosis of nonautologous biological bypass graft of lower extremity with ulceration of thigh                          | 440.32, 707.11 | 170.55  |
| Atherosclerosis of nonautologous biological bypass graft of extremity with ulceration                                         | 440.32, 707.9  | 170.55  |
| Atherosclerosis of nonautologous biological bypass graft of other extremity with ulceration                                   | 440.32         | 170.55  |
| Atherosclerosis of nonautologous biological bypass graft(s) of other extremity with ulceration                                | 440.32         | 170.55  |

|                                                                                                                                                  |                |        |
|--------------------------------------------------------------------------------------------------------------------------------------------------|----------------|--------|
| Atherosclerosis of nonautologous biological bypass graft of lower extremity with ulceration of other part of foot                                | 440.32, 707.15 | 170.55 |
| Atherosclerosis of nonautologous biological bypass graft of lower extremity with ulceration of other part of lower leg                           | 440.32, 707.19 | 170.55 |
| Atherosclerosis of nonautologous biological bypass graft of lower extremity with ulceration, unspecified laterality, unspecified ulceration site | 440.32, 707.10 | 170.55 |
| Atherosclerosis of nonautologous biological bypass graft of lower extremity with ulceration of other part of lower leg, unspecified laterality   | 440.32, 707.19 | 170.55 |
| Atherosclerosis of nonautologous biological bypass graft of lower extremity with ulceration of midfoot, unspecified laterality                   | 440.32, 707.14 | 170.55 |
| Atherosclerosis of nonautologous biological bypass graft of lower extremity with ulceration of calf, unspecified laterality                      | 440.32, 707.12 | 170.55 |
| Atherosclerosis of nonautologous biological bypass graft of lower extremity with ulceration of heel, unspecified laterality                      | 440.32, 707.14 | 170.55 |
| Atherosclerosis of nonautologous biological bypass graft of lower extremity with ulceration of ankle, unspecified laterality                     | 440.32, 707.13 | 170.55 |
| Atherosclerosis of nonautologous biological bypass graft of lower extremity with ulceration of other part of foot, unspecified laterality        | 440.32, 707.15 | 170.55 |
| Atherosclerosis of nonautologous biological bypass graft of lower extremity with ulceration of thigh, unspecified laterality                     | 440.32, 707.11 | 170.55 |

|                                                                                                              |               |         |
|--------------------------------------------------------------------------------------------------------------|---------------|---------|
| Atherosclerosis of nonautologous biological bypass graft of extremity with ulceration, unspecified extremity | 440.32, 707.9 | 170.55  |
| Atherosclerosis of nonautologous biological bypass graft(s) of other extremity with ulceration               |               | 170.55  |
| Atherosclerosis of nonautologous biological bypass graft(s) of the extremities with gangrene                 |               | 170.56  |
| Atheroscler nonautolg biological bypass graft right leg w/gangrene                                           | 440.32        | 170.561 |
| Atherosclerosis of nonautologous biological bypass graft of right lower extremity with gangrene              | 440.32        | 170.561 |
| Atherosclerosis of nonautologous biological bypass graft(s) of the extremities with gangrene, right leg      | 440.32        | 170.561 |
| Athscl nonaut bio bypass of the extrm w gangrene, right leg                                                  | 440.32        | 170.561 |
| Atherosclerosis of nonautologous biological bypass graft(s) of the extremities with gangrene, right leg      |               | 170.561 |
| Atheroscler nonautolg biological bypass graft left leg w/gangrene                                            | 440.32, 785.4 | 170.562 |
| Atherosclerosis of nonautologous biological bypass graft of left lower extremity with gangrene               | 440.32, 785.4 | 170.562 |
| Atherosclerosis of nonautologous biological bypass graft(s) of the extremities with gangrene, left leg       | 440.32, 785.4 | 170.562 |
| Athscl nonaut bio bypass of the extrm w gangrene, left leg                                                   | 440.32, 785.4 | 170.562 |
| Atherosclerosis of nonautologous biological bypass graft(s) of the extremities with gangrene, left leg       |               | 170.562 |
| Atheroscler nonautolg biological bypass graft both legs w/gangrene                                           | 440.32, 785.4 | 170.563 |



|                                                                                                                     |               |         |
|---------------------------------------------------------------------------------------------------------------------|---------------|---------|
| Atherosclerosis of nonautologous biological bypass graft of both lower extremities with gangrene                    | 440.32, 785.4 | 170.563 |
| Atherosclerosis of nonautologous biological bypass graft(s) of the extremities with gangrene, bilateral legs        | 440.32, 785.4 | 170.563 |
| Ath scl nonaut bio bypass of the extrm w gangrene, bi legs                                                          | 440.32, 785.4 | 170.563 |
| Atherosclerosis of nonautologous biological bypass graft(s) of the extremities with gangrene, bilateral legs        |               | 170.563 |
| Ath scl nonaut bio bypass of the extrm w gangrene, oth extrm                                                        | 440.32        | 170.568 |
| Atherosclerosis of nonautologous biological bypass graft of other extremity with gangrene                           | 440.32        | 170.568 |
| Atherosclerosis of nonautologous biological bypass graft(s) of the extremities with gangrene, other extremity       | 440.32        | 170.568 |
| Atherosclerosis of nonautologous biological bypass graft(s) of the extremities with gangrene, other extremity       |               | 170.568 |
| Atheroscler nonautolg biological bypass graft extremity w/gangrene                                                  | 440.32        | 170.569 |
| Atherosclerosis of nonautologous biological bypass graft of extremity with gangrene                                 | 440.32        | 170.569 |
| Atherosclerosis of nonautologous biological bypass graft of lower extremity with gangrene                           | 440.32, 785.4 | 170.569 |
| Atherosclerosis of nonautologous biological bypass graft(s) of the extremities with gangrene, unspecified extremity | 440.32        | 170.569 |
| Atherosclerosis of nonautologous biological bypass graft of lower extremity with gangrene, unspecified laterality   | 440.32, 785.4 | 170.569 |

|                                                                                                                     |        |         |
|---------------------------------------------------------------------------------------------------------------------|--------|---------|
| Atherosclerosis of nonautologous biological bypass graft of extremity with gangrene, unspecified extremity          | 440.32 | 170.569 |
| Athscl nonaut bio bypass of the extrm w gangrene, unsp extrm                                                        | 440.32 | 170.569 |
| Atherosclerosis of nonautologous biological bypass graft(s) of the extremities with gangrene, unspecified extremity |        | 170.569 |
| Other atherosclerosis of nonautologous biological bypass graft(s) of the extremities                                |        | 170.59  |
| Oth athscl nonaut bio bypass of the extremities, right leg                                                          | 440.32 | 170.591 |
| Other atherosclerosis of nonautologous biological bypass graft(s) of the extremities, right leg                     | 440.32 | 170.591 |
| Atherosclerosis of nonautologous biological bypass graft of right lower extremity with other clinical manifestation | 440.32 | 170.591 |
| Other atherosclerosis of nonautologous biological bypass graft(s) of the extremities, right leg                     |        | 170.591 |
| Oth athscl nonaut bio bypass of the extremities, left leg                                                           | 440.32 | 170.592 |
| Other atherosclerosis of nonautologous biological bypass graft(s) of the extremities, left leg                      | 440.32 | 170.592 |
| Atherosclerosis of nonautologous biological bypass graft of left lower extremity with other clinical manifestation  | 440.32 | 170.592 |
| Other atherosclerosis of nonautologous biological bypass graft(s) of the extremities, left leg                      |        | 170.592 |
| Oth athscl nonaut bio bypass of the extrm, bilateral legs                                                           | 440.32 | 170.593 |

|                                                                                                                      |        |         |
|----------------------------------------------------------------------------------------------------------------------|--------|---------|
| Other atherosclerosis of nonautologous biological bypass graft(s) of the extremities, bilateral legs                 | 440.32 | 170.593 |
| Atherosclerosis of nonautologous biological bypass graft of both lower extremities with other clinical manifestation | 440.32 | 170.593 |
| Other atherosclerosis of nonautologous biological bypass graft(s) of the extremities, bilateral legs                 |        | 170.593 |
| Oth athscl nonaut bio bypass of the extrm, oth extremity                                                             | 440.32 | 170.598 |
| Other atherosclerosis of nonautologous biological bypass graft(s) of the extremities, other extremity                | 440.32 | 170.598 |
| Atherosclerosis of nonautologous biological bypass graft of other extremity with other clinical manifestation        | 440.32 | 170.598 |
| Other atherosclerosis of nonautologous biological bypass graft(s) of the extremities, other extremity                |        | 170.598 |
| Atherosclerotic disease of nonautologous bypass graft of extremity                                                   | 440.32 | 170.599 |
| Oth athscl nonaut bio bypass of the extrm, unsp extremity                                                            | 440.32 | 170.599 |
| Atherosclerosis of nonautologous bypass graft of extremity                                                           | 440.32 | 170.599 |
| Other atherosclerosis of nonautologous biological bypass graft(s) of the extremities, unspecified extremity          | 440.32 | 170.599 |
| Atherosclerosis of nonautologous biological bypass graft of extremity with other clinical manifestation              | 440.32 | 170.599 |
| Atherosclerosis of nonautologous biological bypass graft of lower extremity with other clinical manifestation        | 440.32 | 170.599 |

|                                                                                                                                       |        |         |
|---------------------------------------------------------------------------------------------------------------------------------------|--------|---------|
| Atherosclerosis of nonautologous biological bypass graft of lower extremity with other clinical manifestation, unspecified laterality | 440.32 | 170.599 |
| Atherosclerosis of nonautologous biological bypass graft of extremity with other clinical manifestation, unspecified extremity        | 440.32 | 170.599 |
| Other atherosclerosis of nonautologous biological bypass graft(s) of the extremities, unspecified extremity                           |        | 170.599 |
| Atherosclerosis of nonbiological bypass graft(s) of the extremities                                                                   |        | 170.6   |
| Unspecified atherosclerosis of nonbiological bypass graft(s) of the extremities                                                       |        | 170.60  |
| Atherosclerosis of nonbiological bypass graft of right lower extremity                                                                | 440.3  | 170.601 |
| Unspecified atherosclerosis of nonbiological bypass graft(s) of the extremities, right leg                                            | 440.3  | 170.601 |
| Atherosclerosis of nonbiological bypass graft of right lower extremity, with unspecified presence of clinical manifestation           | 440.3  | 170.601 |
| Unsp athscl nonbiol bypass of the extremities, right leg                                                                              | 440.3  | 170.601 |
| Unspecified atherosclerosis of nonbiological bypass graft(s) of the extremities, right leg                                            |        | 170.601 |
| Atherosclerosis of nonbiological bypass graft of left lower extremity                                                                 | 440.3  | 170.602 |
| Unspecified atherosclerosis of nonbiological bypass graft(s) of the extremities, left leg                                             | 440.3  | 170.602 |

|                                                                                                                              |       |         |
|------------------------------------------------------------------------------------------------------------------------------|-------|---------|
| Atherosclerosis of nonbiological bypass graft of left lower extremity, with unspecified presence of clinical manifestation   | 440.3 | 170.602 |
| Unsp athscl nonbiol bypass of the extremities, left leg                                                                      | 440.3 | 170.602 |
| Unspecified atherosclerosis of nonbiological bypass graft(s) of the extremities, left leg                                    |       | 170.602 |
| Atherosclerosis of nonbiological bypass graft of both legs                                                                   | 440.3 | 170.603 |
| Atherosclerosis of nonbiological bypass graft of both lower extremities                                                      | 440.3 | 170.603 |
| Unspecified atherosclerosis of nonbiological bypass graft(s) of the extremities, bilateral legs                              | 440.3 | 170.603 |
| Atherosclerosis of nonbiological bypass graft of both lower extremities, with unspecified presence of clinical manifestation | 440.3 | 170.603 |
| Unsp athscl nonbiol bypass of the extrm, bilateral legs                                                                      | 440.3 | 170.603 |
| Unspecified atherosclerosis of nonbiological bypass graft(s) of the extremities, bilateral legs                              |       | 170.603 |
| Unsp athscl nonbiol bypass of the extremities, oth extremity                                                                 | 440.3 | 170.608 |
| Atherosclerosis of nonbiological bypass graft of other extremity                                                             | 440.3 | 170.608 |
| Unspecified atherosclerosis of nonbiological bypass graft(s) of the extremities, other extremity                             | 440.3 | 170.608 |
| Atherosclerosis of nonbiological bypass graft of other extremity, with unspecified presence of clinical manifestation        | 440.3 | 170.608 |

|                                                                                                                                               |       |         |
|-----------------------------------------------------------------------------------------------------------------------------------------------|-------|---------|
| Unspecified atherosclerosis of nonbiological bypass graft(s) of the extremities, other extremity                                              |       | 170.608 |
| Atherosclerosis of nonbiological bypass graft of extremity                                                                                    | 440.3 | 170.609 |
| Atherosclerosis of nonbiological bypass graft of lower extremity                                                                              | 440.3 | 170.609 |
| Unspecified atherosclerosis of nonbiological bypass graft(s) of the extremities, unspecified extremity                                        | 440.3 | 170.609 |
| Atherosclerosis of nonbiological bypass graft of lower extremity, unspecified laterality, with unspecified presence of clinical manifestation | 440.3 | 170.609 |
| Atherosclerosis of nonbiological bypass graft of extremity, unspecified extremity, with unspecified presence of clinical manifestation        | 440.3 | 170.609 |
| Unsp athscl nonbiol bypass of the extrm, unsp extremity                                                                                       | 440.3 | 170.609 |
| Unspecified atherosclerosis of nonbiological bypass graft(s) of the extremities, unspecified extremity                                        |       | 170.609 |
| Atherosclerosis of nonbiological bypass graft(s) of the extremities with intermittent claudication                                            |       | 170.61  |
| Atheroscler nonbiologic bypass graft right leg w/intermit claudication                                                                        | 440.3 | 170.611 |
| Atherosclerosis of nonbiological bypass graft of right lower extremity with intermittent claudication                                         | 440.3 | 170.611 |
| Atherosclerosis of nonbiological bypass graft(s) of the extremities with intermittent claudication, right leg                                 | 440.3 | 170.611 |
| Athscl nonbiol bypass of the extrm w intrmt claud, right leg                                                                                  | 440.3 | 170.611 |

|                                                                                                                     |       |         |
|---------------------------------------------------------------------------------------------------------------------|-------|---------|
| Atherosclerosis of nonbiological bypass graft(s) of the extremities with intermittent claudication, right leg       |       | 170.611 |
| Atheroscler nonbiologic bypass graft left leg w/intermit claudication                                               | 440.3 | 170.612 |
| Atherosclerosis of nonbiological bypass graft of left lower extremity with intermittent claudication                | 440.3 | 170.612 |
| Atherosclerosis of nonbiological bypass graft(s) of the extremities with intermittent claudication, left leg        | 440.3 | 170.612 |
| Ath scl nonbiol bypass of the extrm w intrmt claud, left leg                                                        | 440.3 | 170.612 |
| Atherosclerosis of nonbiological bypass graft(s) of the extremities with intermittent claudication, left leg        |       | 170.612 |
| Atheroscler nonbiologic bypass graft both legs w/intermit claudication                                              | 440.3 | 170.613 |
| Atherosclerosis of nonbiological bypass graft of both lower extremities with intermittent claudication              | 440.3 | 170.613 |
| Atherosclerosis of nonbiological bypass graft(s) of the extremities with intermittent claudication, bilateral legs  | 440.3 | 170.613 |
| Ath scl nonbiol bypass of the extrm w intrmt claud, bi legs                                                         | 440.3 | 170.613 |
| Atherosclerosis of nonbiological bypass graft(s) of the extremities with intermittent claudication, bilateral legs  |       | 170.613 |
| Ath scl nonbiol bypass of the extrm w intrmt claud, oth extrm                                                       | 440.3 | 170.618 |
| Atherosclerosis of nonbiological bypass graft of other extremity with intermittent claudication                     | 440.3 | 170.618 |
| Atherosclerosis of nonbiological bypass graft(s) of the extremities with intermittent claudication, other extremity | 440.3 | 170.618 |

|                                                                                                                           |               |         |
|---------------------------------------------------------------------------------------------------------------------------|---------------|---------|
| Atherosclerosis of nonbiological bypass graft(s) of the extremities with intermittent claudication, other extremity       |               | 170.618 |
| Atheroscler nonbiologic bypass graft extremity w/intermit claudication                                                    | 440.3         | 170.619 |
| Atherosclerosis of nonbiological bypass graft of extremity with intermittent claudication                                 | 440.3         | 170.619 |
| Atherosclerosis of nonbiological bypass graft of lower extremity with intermittent claudication                           | 440.30, 443.9 | 170.619 |
| Atherosclerosis of nonbiological bypass graft(s) of the extremities with intermittent claudication, unspecified extremity | 440.3         | 170.619 |
| Atherosclerosis of nonbiological bypass graft of lower extremity with intermittent claudication, unspecified laterality   | 440.30, 443.9 | 170.619 |
| Atherosclerosis of nonbiological bypass graft of extremity with intermittent claudication, unspecified extremity          | 440.3         | 170.619 |
| Ath scl nonbiol bypass of extrm w intrmt claud, unsp extrm                                                                | 440.3         | 170.619 |
| Atherosclerosis of nonbiological bypass graft(s) of the extremities with intermittent claudication, unspecified extremity |               | 170.619 |
| Atherosclerosis of nonbiological bypass graft(s) of the extremities with rest pain                                        |               | 170.62  |
| Atheroscler of nonbiologic bypass graft of right leg with rest pain                                                       | 440.3         | 170.621 |
| Atherosclerosis of nonbiological bypass graft of right lower extremity with rest pain                                     | 440.3         | 170.621 |
| Atherosclerosis of nonbiological bypass graft(s) of the extremities with rest pain, right leg                             | 440.3         | 170.621 |



|                                                                                                     |       |         |
|-----------------------------------------------------------------------------------------------------|-------|---------|
| Athscl nonbiol bypass of the extrm w rest pain, right leg                                           | 440.3 | 170.621 |
| Atherosclerosis of nonbiological bypass graft(s) of the extremities with rest pain, right leg       |       | 170.621 |
| Atherosclerosis of nonbiologic bypass graft of left leg with rest pain                              | 440.3 | 170.622 |
| Atherosclerosis of nonbiological bypass graft of left lower extremity with rest pain                | 440.3 | 170.622 |
| Atherosclerosis of nonbiological bypass graft(s) of the extremities with rest pain, left leg        | 440.3 | 170.622 |
| Athscl nonbiol bypass of the extrm w rest pain, left leg                                            | 440.3 | 170.622 |
| Atherosclerosis of nonbiological bypass graft(s) of the extremities with rest pain, left leg        |       | 170.622 |
| Atheroscler of nonbiologic bypass graft of both legs with rest pain                                 | 440.3 | 170.623 |
| Atherosclerosis of nonbiological bypass graft of both lower extremities with rest pain              | 440.3 | 170.623 |
| Atherosclerosis of nonbiological bypass graft(s) of the extremities with rest pain, bilateral legs  | 440.3 | 170.623 |
| Athscl nonbiol bypass of the extrm w rest pain, bi legs                                             | 440.3 | 170.623 |
| Atherosclerosis of nonbiological bypass graft(s) of the extremities with rest pain, bilateral legs  |       | 170.623 |
| Athscl nonbiol bypass of the extrm w rest pain, oth extrm                                           | 440.3 | 170.628 |
| Atherosclerosis of nonbiological bypass graft of other extremity with rest pain                     | 440.3 | 170.628 |
| Atherosclerosis of nonbiological bypass graft(s) of the extremities with rest pain, other extremity | 440.3 | 170.628 |

|                                                                                                           |                |         |
|-----------------------------------------------------------------------------------------------------------|----------------|---------|
| Atherosclerosis of nonbiological bypass graft(s) of the extremities with rest pain, other extremity       |                | 170.628 |
| Atheroscler of nonbiologic bypass graft of extremity with rest pain                                       | 440.3          | 170.629 |
| Atherosclerosis of nonbiological bypass graft of extremity with rest pain                                 | 440.3          | 170.629 |
| Atherosclerosis of nonbiological bypass graft of lower extremity with rest pain                           | 440.3          | 170.629 |
| Atherosclerosis of nonbiological bypass graft(s) of the extremities with rest pain, unspecified extremity | 440.3          | 170.629 |
| Atherosclerosis of nonbiological bypass graft of lower extremity with rest pain, unspecified laterality   | 440.3          | 170.629 |
| Atherosclerosis of nonbiological bypass graft of extremity with rest pain, unspecified extremity          | 440.3          | 170.629 |
| Ath scl nonbiol bypass of the extrm w rest pain, unsp extrm                                               | 440.3          | 170.629 |
| Atherosclerosis of nonbiological bypass graft(s) of the extremities with rest pain, unspecified extremity |                | 170.629 |
| Atherosclerosis of nonbiological bypass graft(s) of the right leg with ulceration                         |                | 170.63  |
| Atheroscler nonbiologic bypass graft right leg w/ulceration thigh                                         | 440.30, 707.11 | 170.631 |
| Atherosclerosis of nonbiological bypass graft of right lower extremity with ulceration of thigh           | 440.30, 707.11 | 170.631 |
| Atherosclerosis of nonbiological bypass graft(s) of the right leg with ulceration of thigh                | 440.30, 707.11 | 170.631 |
| Ath scl nonbiol bypass of the right leg w ulceration of thigh                                             | 440.30, 707.11 | 170.631 |

|                                                                                                             |                |                  |
|-------------------------------------------------------------------------------------------------------------|----------------|------------------|
| Atherosclerosis of nonbiological bypass graft(s) of the right leg with ulceration of thigh                  |                | 170.631          |
| Atherosclerosis of nonbiological bypass graft of both lower extremities with bilateral ulceration of thighs | 440.30, 707.11 | 170.631, 170.641 |
| Atheroscler nonbiologic bypass graft right leg w/ulceration calf                                            | 440.30, 707.12 | 170.632          |
| Atherosclerosis of nonbiological bypass graft of right lower extremity with ulceration of calf              | 440.30, 707.12 | 170.632          |
| Atherosclerosis of nonbiological bypass graft(s) of the right leg with ulceration of calf                   | 440.30, 707.12 | 170.632          |
| Athsc1 nonbiol bypass of the right leg w ulceration of calf                                                 | 440.30, 707.12 | 170.632          |
| Atherosclerosis of nonbiological bypass graft(s) of the right leg with ulceration of calf                   |                | 170.632          |
| Atherosclerosis of nonbiological bypass graft of both lower extremities with bilateral ulceration of calves | 440.30, 707.12 | 170.632, 170.642 |
| Atheroscler nonbiologic bypass graft right leg w/ulceration ankle                                           | 440.30, 707.13 | 170.633          |
| Atherosclerosis of nonbiological bypass graft of right lower extremity with ulceration of ankle             | 440.30, 707.13 | 170.633          |
| Atherosclerosis of nonbiological bypass graft(s) of the right leg with ulceration of ankle                  | 440.30, 707.13 | 170.633          |
| Athsc1 nonbiol bypass of the right leg w ulceration of ankle                                                | 440.30, 707.13 | 170.633          |
| Atherosclerosis of nonbiological bypass graft(s) of the right leg with ulceration of ankle                  |                | 170.633          |

|                                                                                                                         |                |                  |
|-------------------------------------------------------------------------------------------------------------------------|----------------|------------------|
| Atherosclerosis of nonbiological bypass graft of both lower extremities with bilateral ulceration of ankles             | 440.30, 707.13 | 170.633, 170.643 |
| Athsc1 nonbiol bypass of right leg w ulcer of heel and midft                                                            | 440.3          | 170.634          |
| Atherosclerosis of nonbiological bypass graft of right lower extremity with ulceration of heel                          | 440.30, 707.14 | 170.634          |
| Atherosclerosis of nonbiological bypass graft of right lower extremity with ulceration of midfoot                       | 440.30, 707.14 | 170.634          |
| Atherosclerosis of nonbiological bypass graft(s) of the right leg with ulceration of heel and midfoot                   | 440.3          | 170.634          |
| Atherosclerosis of nonbiological bypass graft(s) of the right leg with ulceration of heel and midfoot                   |                | 170.634          |
| Atherosclerosis of nonbiological bypass graft of both lower extremities with bilateral ulceration of midfeet            | 440.30, 707.14 | 170.634, 170.644 |
| Atherosclerosis of nonbiological bypass graft of both lower extremities with bilateral ulceration of heels              | 440.30, 707.14 | 170.634, 170.644 |
| Athsc1 nonbiol bypass of the right leg w ulcer oth prt foot                                                             | 440.3          | 170.635          |
| Atherosclerosis of nonbiological bypass graft of right lower extremity with ulceration of other part of foot            | 440.3          | 170.635          |
| Atherosclerosis of nonbiological bypass graft(s) of the right leg with ulceration of other part of foot                 | 440.3          | 170.635          |
| Atherosclerosis of nonbiological bypass graft(s) of the right leg with ulceration of other part of foot                 |                | 170.635          |
| Atherosclerosis of nonbiological bypass graft of both lower extremities with bilateral ulceration of other part of feet | 440.30, 707.15 | 170.635, 170.645 |

|                                                                                                                               |                |                  |
|-------------------------------------------------------------------------------------------------------------------------------|----------------|------------------|
| Athscl nonbiol bypass of right leg w ulcer oth prt low leg                                                                    | 440.3          | 170.638          |
| Atherosclerosis of nonbiological bypass graft of right lower extremity with ulceration of other part of lower leg             | 440.3          | 170.638          |
| Atherosclerosis of nonbiological bypass graft(s) of the right leg with ulceration of other part of lower leg                  | 440.3          | 170.638          |
| Atherosclerosis of nonbiological bypass graft(s) of the right leg with ulceration of other part of lower leg                  |                | 170.638          |
| Atherosclerosis of nonbiological bypass graft of both lower extremities with bilateral ulceration of other part of lower legs | 440.30, 707.19 | 170.638, 170.648 |
| Atheroscler of nonbiologic bypass graft of right leg with ulceration                                                          | 440.30, 707.9  | 170.639          |
| Atherosclerosis of nonbiological bypass graft of right lower extremity with ulceration                                        | 440.30, 707.9  | 170.639          |
| Atherosclerosis of nonbiological bypass graft(s) of the right leg with ulceration of unspecified site                         | 440.30, 707.9  | 170.639          |
| Atherosclerosis of nonbiological bypass graft of right lower extremity with ulceration, unspecified ulceration site           | 440.30, 707.9  | 170.639          |
| Athscl nonbiol bypass of the right leg w ulcer of unsp site                                                                   | 440.30, 707.9  | 170.639          |
| Atherosclerosis of nonbiological bypass graft(s) of the right leg with ulceration of unspecified site                         |                | 170.639          |
| Atherosclerosis of nonbiological bypass graft of both lower extremities with bilateral ulceration                             | 440.30, 707.10 | 170.639, 170.649 |

|                                                                                                                                |                |                  |
|--------------------------------------------------------------------------------------------------------------------------------|----------------|------------------|
| Atherosclerosis of nonbiological bypass graft of both lower extremities with bilateral ulceration, unspecified ulceration site | 440.30, 707.10 | 170.639, 170.649 |
| Atherosclerosis of nonbiological bypass graft(s) of the left leg with ulceration                                               |                | 170.64           |
| Atheroscler nonbiologic bypass graft left leg w/ulceration thigh                                                               | 440.30, 707.11 | 170.641          |
| Atherosclerosis of nonbiological bypass graft of left lower extremity with ulceration of thigh                                 | 440.30, 707.11 | 170.641          |
| Atherosclerosis of nonbiological bypass graft(s) of the left leg with ulceration of thigh                                      | 440.30, 707.11 | 170.641          |
| Atheroscler nonbiol bypass of the left leg w ulceration of thigh                                                               | 440.30, 707.11 | 170.641          |
| Atherosclerosis of nonbiological bypass graft(s) of the left leg with ulceration of thigh                                      |                | 170.641          |
| Atheroscler nonbiologic bypass graft left leg w/ulceration calf                                                                | 440.30, 707.12 | 170.642          |
| Atherosclerosis of nonbiological bypass graft of left lower extremity with ulceration of calf                                  | 440.30, 707.12 | 170.642          |
| Atherosclerosis of nonbiological bypass graft(s) of the left leg with ulceration of calf                                       | 440.30, 707.12 | 170.642          |
| Atheroscler nonbiol bypass of the left leg w ulceration of calf                                                                | 440.30, 707.12 | 170.642          |
| Atherosclerosis of nonbiological bypass graft(s) of the left leg with ulceration of calf                                       |                | 170.642          |
| Atheroscler nonbiologic bypass graft left leg w/ulceration ankle                                                               | 440.3          | 170.643          |
| Atherosclerosis of nonbiological bypass graft of left lower extremity with ulceration of ankle                                 | 440.3          | 170.643          |

|                                                                                                             |                |         |
|-------------------------------------------------------------------------------------------------------------|----------------|---------|
| Atherosclerosis of nonbiological bypass graft(s) of the left leg with ulceration of ankle                   | 440.3          | 170.643 |
| Athscl nonbiol bypass of the left leg w ulceration of ankle                                                 | 440.3          | 170.643 |
| Atherosclerosis of nonbiological bypass graft(s) of the left leg with ulceration of ankle                   |                | 170.643 |
| Athscl nonbiol bypass of left leg w ulcer of heel and midft                                                 | 440.3          | 170.644 |
| Atherosclerosis of nonbiological bypass graft of left lower extremity with ulceration of midfoot            | 440.30, 707.14 | 170.644 |
| Atherosclerosis of nonbiological bypass graft of left lower extremity with ulceration of heel               | 440.30, 707.14 | 170.644 |
| Atherosclerosis of nonbiological bypass graft(s) of the left leg with ulceration of heel and midfoot        | 440.3          | 170.644 |
| Atherosclerosis of nonbiological bypass graft(s) of the left leg with ulceration of heel and midfoot        |                | 170.644 |
| Athscl nonbiol bypass of the left leg w ulcer oth prt foot                                                  | 440.3          | 170.645 |
| Atherosclerosis of nonbiological bypass graft of left lower extremity with ulceration of other part of foot | 440.3          | 170.645 |
| Atherosclerosis of nonbiological bypass graft(s) of the left leg with ulceration of other part of foot      | 440.3          | 170.645 |
| Atherosclerosis of nonbiological bypass graft(s) of the left leg with ulceration of other part of foot      |                | 170.645 |
| Athscl nonbiol bypass of left leg w ulcer oth prt low leg                                                   | 440.3          | 170.648 |

|                                                                                                                    |                |         |
|--------------------------------------------------------------------------------------------------------------------|----------------|---------|
| Atherosclerosis of nonbiological bypass graft of left lower extremity with ulceration of other part of lower leg   | 440.3          | 170.648 |
| Atherosclerosis of nonbiological bypass graft(s) of the left leg with ulceration of other part of lower leg        | 440.3          | 170.648 |
| Atherosclerosis of nonbiological bypass graft(s) of the left leg with ulceration of other part of lower leg        |                | 170.648 |
| Atheroscler of nonbiologic bypass graft of left leg with ulceration                                                | 440.3          | 170.649 |
| Atherosclerosis of nonbiological bypass graft of left lower extremity with ulceration                              | 440.3          | 170.649 |
| Atherosclerosis of nonbiological bypass graft(s) of the left leg with ulceration of unspecified site               | 440.3          | 170.649 |
| Atherosclerosis of nonbiological bypass graft of left lower extremity with ulceration, unspecified ulceration site | 440.3          | 170.649 |
| Ath scl nonbiol bypass of the left leg w ulcer of unsp site                                                        | 440.3          | 170.649 |
| Atherosclerosis of nonbiological bypass graft(s) of the left leg with ulceration of unspecified site               |                | 170.649 |
| Ath scl nonbiological bypass of extremity w ulceration                                                             | 440.30, 707.9  | 170.65  |
| Atherosclerosis of nonbiological bypass graft of lower extremity with ulceration of midfoot                        | 440.30, 707.14 | 170.65  |
| Atherosclerosis of nonbiological bypass graft of lower extremity with ulceration of thigh                          | 440.30, 707.11 | 170.65  |
| Atherosclerosis of nonbiological bypass graft of lower extremity with ulceration of ankle                          | 440.30, 707.13 | 170.65  |



|                                                                                                                                       |                |        |
|---------------------------------------------------------------------------------------------------------------------------------------|----------------|--------|
| Atherosclerosis of nonbiological bypass graft of lower extremity with ulceration of calf                                              | 440.30, 707.12 | 170.65 |
| Atherosclerosis of nonbiological bypass graft of lower extremity with ulceration of heel                                              | 440.30, 707.14 | 170.65 |
| Atherosclerosis of nonbiological bypass graft of lower extremity with ulceration                                                      | 440.30, 707.10 | 170.65 |
| Atherosclerosis of nonbiological bypass graft of extremity with ulceration                                                            | 440.30, 707.9  | 170.65 |
| Atherosclerosis of nonbiological bypass graft of other extremity with ulceration                                                      | 440.3          | 170.65 |
| Atherosclerosis of nonbiological bypass graft(s) of other extremity with ulceration                                                   | 440.3          | 170.65 |
| Atherosclerosis of nonbiological bypass graft of lower extremity with ulceration of other part of foot                                | 440.30, 707.15 | 170.65 |
| Atherosclerosis of nonbiological bypass graft of lower extremity with ulceration of other part of lower leg                           | 440.30, 707.19 | 170.65 |
| Atherosclerosis of nonbiological bypass graft of lower extremity with ulceration, unspecified laterality, unspecified ulceration site | 440.30, 707.10 | 170.65 |
| Atherosclerosis of nonbiological bypass graft of lower extremity with ulceration of midfoot, unspecified laterality                   | 440.30, 707.14 | 170.65 |
| Atherosclerosis of nonbiological bypass graft of lower extremity with ulceration of heel, unspecified laterality                      | 440.30, 707.14 | 170.65 |
| Atherosclerosis of nonbiological bypass graft of lower extremity with ulceration of ankle, unspecified laterality                     | 440.30, 707.13 | 170.65 |
| Atherosclerosis of nonbiological bypass graft of lower extremity with ulceration of thigh, unspecified laterality                     | 440.30, 707.11 | 170.65 |

|                                                                                                                                     |                |         |
|-------------------------------------------------------------------------------------------------------------------------------------|----------------|---------|
| Atherosclerosis of nonbiological bypass graft of lower extremity with ulceration of other part of lower leg, unspecified laterality | 440.30, 707.19 | 170.65  |
| Atherosclerosis of nonbiological bypass graft of lower extremity with ulceration of other part of foot, unspecified laterality      | 440.30, 707.15 | 170.65  |
| Atherosclerosis of nonbiological bypass graft of lower extremity with ulceration of calf, unspecified laterality                    | 440.30, 707.12 | 170.65  |
| Atherosclerosis of nonbiological bypass graft of extremity with ulceration, unspecified extremity                                   | 440.30, 707.9  | 170.65  |
| Atherosclerosis of nonbiological bypass graft(s) of other extremity with ulceration                                                 |                | 170.65  |
| Atherosclerosis of nonbiological bypass graft(s) of the extremities with gangrene                                                   |                | 170.66  |
| Atherosclerosis of nonbiologic bypass graft of right leg with gangrene                                                              | 440.30, 785.4  | 170.661 |
| Atherosclerosis of nonbiological bypass graft of right lower extremity with gangrene                                                | 440.30, 785.4  | 170.661 |
| Atherosclerosis of nonbiological bypass graft(s) of the extremities with gangrene, right leg                                        | 440.30, 785.4  | 170.661 |
| Atherosclerosis of nonbiological bypass graft of the extremities with gangrene, right leg                                           | 440.30, 785.4  | 170.661 |
| Atherosclerosis of nonbiological bypass graft(s) of the extremities with gangrene, right leg                                        |                | 170.661 |
| Atherosclerosis of nonbiologic bypass graft of left leg with gangrene                                                               | 440.30, 785.4  | 170.662 |
| Atherosclerosis of nonbiological bypass graft of left lower extremity with gangrene                                                 | 440.30, 785.4  | 170.662 |

|                                                                                                    |               |         |
|----------------------------------------------------------------------------------------------------|---------------|---------|
| Atherosclerosis of nonbiological bypass graft(s) of the extremities with gangrene, left leg        | 440.30, 785.4 | 170.662 |
| Athscl nonbiol bypass of the extrm w gangrene, left leg                                            | 440.30, 785.4 | 170.662 |
| Atherosclerosis of nonbiological bypass graft(s) of the extremities with gangrene, left leg        |               | 170.662 |
| Atheroscler of nonbiologic bypass graft of bilateral legs w/gangrene                               | 440.30, 785.4 | 170.663 |
| Atherosclerosis of nonbiological bypass graft of bilateral lower extremities with gangrene         | 440.30, 785.4 | 170.663 |
| Atherosclerosis of nonbiological bypass graft of both lower extremities with gangrene              | 440.30, 785.4 | 170.663 |
| Atherosclerosis of nonbiological bypass graft(s) of the extremities with gangrene, bilateral legs  | 440.30, 785.4 | 170.663 |
| Athscl nonbiol bypass of the extrm w gangrene, bi legs                                             | 440.30, 785.4 | 170.663 |
| Atherosclerosis of nonbiological bypass graft(s) of the extremities with gangrene, bilateral legs  |               | 170.663 |
| Athscl nonbiol bypass of the extrm w gangrene, oth extremity                                       | 440.3         | 170.668 |
| Atherosclerosis of nonbiological bypass graft of other extremity with gangrene                     | 440.3         | 170.668 |
| Atherosclerosis of nonbiological bypass graft(s) of the extremities with gangrene, other extremity | 440.3         | 170.668 |
| Atherosclerosis of nonbiological bypass graft(s) of the extremities with gangrene, other extremity |               | 170.668 |
| Atherosclerosis of nonbiologic bypass graft of extremity with gangrene                             | 440.30, 785.4 | 170.669 |

|                                                                                                          |               |         |
|----------------------------------------------------------------------------------------------------------|---------------|---------|
| Atherosclerosis of nonbiological bypass graft of extremity with gangrene                                 | 440.30, 785.4 | 170.669 |
| Atherosclerosis of nonbiological bypass graft of lower extremity with gangrene                           | 440.30, 785.4 | 170.669 |
| Atherosclerosis of nonbiological bypass graft(s) of the extremities with gangrene, unspecified extremity | 440.30, 785.4 | 170.669 |
| Atherosclerosis of nonbiological bypass graft of lower extremity with gangrene, unspecified laterality   | 440.30, 785.4 | 170.669 |
| Atherosclerosis of nonbiological bypass graft of extremity with gangrene, unspecified extremity          | 440.30, 785.4 | 170.669 |
| Athscl nonbiol bypass of the extrm w gangrene, unsp extrm                                                | 440.30, 785.4 | 170.669 |
| Atherosclerosis of nonbiological bypass graft(s) of the extremities with gangrene, unspecified extremity |               | 170.669 |
| Other atherosclerosis of nonbiological bypass graft(s) of the extremities                                |               | 170.69  |
| Oth athscl nonbiol bypass of the extremities, right leg                                                  | 440.3         | 170.691 |
| Other atherosclerosis of nonbiological bypass graft(s) of the extremities, right leg                     | 440.3         | 170.691 |
| Atherosclerosis of nonbiological bypass graft of right lower extremity with other clinical manifestation | 440.3         | 170.691 |
| Other atherosclerosis of nonbiological bypass graft(s) of the extremities, right leg                     |               | 170.691 |
| Oth athscl nonbiological bypass of the extremities, left leg                                             | 440.3         | 170.692 |
| Other atherosclerosis of nonbiological bypass graft(s) of the extremities, left leg                      | 440.3         | 170.692 |
| Atherosclerosis of nonbiological bypass graft of left lower extremity with other clinical manifestation  | 440.3         | 170.692 |

|                                                                                                           |       |         |
|-----------------------------------------------------------------------------------------------------------|-------|---------|
| Other atherosclerosis of nonbiological bypass graft(s) of the extremities, left leg                       |       | 170.692 |
| Oth athscl nonbiol bypass of the extremities, bilateral legs                                              | 440.3 | 170.693 |
| Other atherosclerosis of nonbiological bypass graft(s) of the extremities, bilateral legs                 | 440.3 | 170.693 |
| Atherosclerosis of nonbiological bypass graft of both lower extremities with other clinical manifestation | 440.3 | 170.693 |
| Other atherosclerosis of nonbiological bypass graft(s) of the extremities, bilateral legs                 |       | 170.693 |
| Oth athscl nonbiol bypass of the extremities, oth extremity                                               | 440.3 | 170.698 |
| Other atherosclerosis of nonbiological bypass graft(s) of the extremities, other extremity                | 440.3 | 170.698 |
| Atherosclerosis of nonbiological bypass graft of other extremity with other clinical manifestation        | 440.3 | 170.698 |
| Other atherosclerosis of nonbiological bypass graft(s) of the extremities, other extremity                |       | 170.698 |
| Oth athscl nonbiol bypass of the extremities, unsp extremity                                              | 440.3 | 170.699 |
| Other atherosclerosis of nonbiological bypass graft(s) of the extremities, unspecified extremity          | 440.3 | 170.699 |
| Atherosclerosis of nonbiological bypass graft of lower extremity with other clinical manifestation        | 440.3 | 170.699 |
| Atherosclerosis of nonbiological bypass graft of extremity with other clinical manifestation              | 440.3 | 170.699 |

|                                                                                                                             |       |         |
|-----------------------------------------------------------------------------------------------------------------------------|-------|---------|
| Atherosclerosis of nonbiological bypass graft of lower extremity with other clinical manifestation, unspecified laterality  | 440.3 | 170.699 |
| Atherosclerosis of nonbiological bypass graft of extremity with other clinical manifestation, unspecified extremity         | 440.3 | 170.699 |
| Other atherosclerosis of nonbiological bypass graft(s) of the extremities, unspecified extremity                            |       | 170.699 |
| Atherosclerosis of other type of bypass graft(s) of the extremities                                                         |       | 170.7   |
| Unspecified atherosclerosis of other type of bypass graft(s) of the extremities                                             |       | 170.70  |
| Unsp athscl type of bypass of the extremities, right leg                                                                    | 440.3 | 170.701 |
| Atherosclerosis of other type of bypass graft of right lower extremity                                                      | 440.3 | 170.701 |
| Unspecified atherosclerosis of other type of bypass graft(s) of the extremities, right leg                                  | 440.3 | 170.701 |
| Atherosclerosis of other type of bypass graft of right lower extremity, with unspecified presence of clinical manifestation | 440.3 | 170.701 |
| Unspecified atherosclerosis of other type of bypass graft(s) of the extremities, right leg                                  |       | 170.701 |
| Unsp athscl type of bypass of the extremities, left leg                                                                     | 440.3 | 170.702 |
| Atherosclerosis of other type of bypass graft of left lower extremity                                                       | 440.3 | 170.702 |
| Unspecified atherosclerosis of other type of bypass graft(s) of the extremities, left leg                                   | 440.3 | 170.702 |
| Atherosclerosis of other type of bypass graft of left lower extremity, with unspecified presence of clinical manifestation  | 440.3 | 170.702 |

|                                                                                                                              |       |         |
|------------------------------------------------------------------------------------------------------------------------------|-------|---------|
| Unspecified atherosclerosis of other type of bypass graft(s) of the extremities, left leg                                    |       | 170.702 |
| Unsp athscl type of bypass of the extrm, bilateral legs                                                                      | 440.3 | 170.703 |
| Atherosclerosis of other type of bypass graft of both lower extremities                                                      | 440.3 | 170.703 |
| Unspecified atherosclerosis of other type of bypass graft(s) of the extremities, bilateral legs                              | 440.3 | 170.703 |
| Atherosclerosis of other type of bypass graft of both lower extremities, with unspecified presence of clinical manifestation | 440.3 | 170.703 |
| Unspecified atherosclerosis of other type of bypass graft(s) of the extremities, bilateral legs                              |       | 170.703 |
| Unsp athscl type of bypass of the extremities, oth extremity                                                                 | 440.3 | 170.708 |
| Atherosclerosis of other type of bypass graft of other extremity                                                             | 440.3 | 170.708 |
| Unspecified atherosclerosis of other type of bypass graft(s) of the extremities, other extremity                             | 440.3 | 170.708 |
| Atherosclerosis of other type of bypass graft of other extremity, with unspecified presence of clinical manifestation        | 440.3 | 170.708 |
| Unspecified atherosclerosis of other type of bypass graft(s) of the extremities, other extremity                             |       | 170.708 |
| Unsp athscl type of bypass of the extrm, unsp extremity                                                                      | 440.3 | 170.709 |
| Atherosclerosis of other type of bypass graft of extremity                                                                   | 440.3 | 170.709 |
| Unspecified atherosclerosis of other type of bypass graft(s) of the extremities, unspecified extremity                       | 440.3 | 170.709 |

|                                                                                                                                        |       |         |
|----------------------------------------------------------------------------------------------------------------------------------------|-------|---------|
| Atherosclerosis of other bypass graft of lower extremity                                                                               | 440.3 | I70.709 |
| Atherosclerosis of other bypass graft of lower extremity, unspecified laterality, with unspecified presence of clinical manifestation  | 440.3 | I70.709 |
| Atherosclerosis of other type of bypass graft of extremity, unspecified extremity, with unspecified presence of clinical manifestation | 440.3 | I70.709 |
| Unspecified atherosclerosis of other type of bypass graft(s) of the extremities, unspecified extremity                                 |       | I70.709 |
| Atherosclerosis of other type of bypass graft(s) of the extremities with intermittent claudication                                     |       | I70.71  |
| Athscl type of bypass of the extrm w intrmt claud, right leg                                                                           | 440.3 | I70.711 |
| Atherosclerosis of other type of bypass graft of right lower extremity with intermittent claudication                                  | 440.3 | I70.711 |
| Atherosclerosis of other type of bypass graft(s) of the extremities with intermittent claudication, right leg                          | 440.3 | I70.711 |
| Atherosclerosis of other type of bypass graft(s) of the extremities with intermittent claudication, right leg                          |       | I70.711 |
| Athscl type of bypass of the extrm w intrmt claud, left leg                                                                            | 440.3 | I70.712 |
| Atherosclerosis of other type of bypass graft of left lower extremity with intermittent claudication                                   | 440.3 | I70.712 |
| Atherosclerosis of other type of bypass graft(s) of the extremities with intermittent claudication, left leg                           | 440.3 | I70.712 |



|                                                                                                                           |               |         |
|---------------------------------------------------------------------------------------------------------------------------|---------------|---------|
| Atherosclerosis of other type of bypass graft(s) of the extremities with intermittent claudication, left leg              |               | 170.712 |
| Atherosclerosis of other type of bypass graft(s) of the extremities with intermittent claudication, left leg              | 440.3         | 170.713 |
| Atherosclerosis of other type of bypass graft of both lower extremities with intermittent claudication                    | 440.3         | 170.713 |
| Atherosclerosis of other type of bypass graft(s) of the extremities with intermittent claudication, bilateral legs        | 440.3         | 170.713 |
| Atherosclerosis of other type of bypass graft(s) of the extremities with intermittent claudication, bilateral legs        |               | 170.713 |
| Atherosclerosis of other type of bypass graft(s) of the extremities with intermittent claudication, bilateral legs        | 440.3         | 170.718 |
| Atherosclerosis of other type of bypass graft of other extremity with intermittent claudication                           | 440.3         | 170.718 |
| Atherosclerosis of other type of bypass graft(s) of the extremities with intermittent claudication, other extremity       | 440.3         | 170.718 |
| Atherosclerosis of other type of bypass graft(s) of the extremities with intermittent claudication, other extremity       |               | 170.718 |
| Atherosclerosis of other type of bypass graft(s) of the extremities with intermittent claudication, other extremity       | 440.3         | 170.719 |
| Atherosclerosis of other type of bypass graft of extremity with intermittent claudication                                 | 440.3         | 170.719 |
| Atherosclerosis of other type of bypass graft(s) of the extremities with intermittent claudication, unspecified extremity | 440.3         | 170.719 |
| Atherosclerosis of other bypass graft of lower extremity with intermittent claudication                                   | 440.30, 443.9 | 170.719 |

|                                                                                                                           |               |         |
|---------------------------------------------------------------------------------------------------------------------------|---------------|---------|
| Atherosclerosis of other bypass graft of lower extremity with intermittent claudication, unspecified laterality           | 440.30, 443.9 | I70.719 |
| Atherosclerosis of other type of bypass graft of extremity with intermittent claudication, unspecified extremity          | 440.3         | I70.719 |
| Atherosclerosis of other type of bypass graft(s) of the extremities with intermittent claudication, unspecified extremity |               | I70.719 |
| Atherosclerosis of other type of bypass graft(s) of the extremities with rest pain                                        |               | I70.72  |
| Atherosclerosis of other type of bypass graft of the extremity with rest pain, right leg                                  | 440.3         | I70.721 |
| Atherosclerosis of other type of bypass graft of right lower extremity with rest pain                                     | 440.3         | I70.721 |
| Atherosclerosis of other type of bypass graft(s) of the extremities with rest pain, right leg                             | 440.3         | I70.721 |
| Atherosclerosis of other type of bypass graft(s) of the extremities with rest pain, right leg                             |               | I70.721 |
| Atherosclerosis of other type of bypass graft of the extremity with rest pain, left leg                                   | 440.3         | I70.722 |
| Atherosclerosis of other type of bypass graft of left lower extremity with rest pain                                      | 440.3         | I70.722 |
| Atherosclerosis of other type of bypass graft(s) of the extremities with rest pain, left leg                              | 440.3         | I70.722 |
| Atherosclerosis of other type of bypass graft(s) of the extremities with rest pain, left leg                              |               | I70.722 |
| Atherosclerosis of other type of bypass graft of the extremity with rest pain, bi legs                                    | 440.3         | I70.723 |

|                                                                                                           |       |         |
|-----------------------------------------------------------------------------------------------------------|-------|---------|
| Atherosclerosis of other type of bypass graft of both lower extremities with rest pain                    | 440.3 | 170.723 |
| Atherosclerosis of other type of bypass graft(s) of the extremities with rest pain, bilateral legs        | 440.3 | 170.723 |
| Atherosclerosis of other type of bypass graft(s) of the extremities with rest pain, bilateral legs        |       | 170.723 |
| Atherosclerosis of other type of bypass graft of the extremities with rest pain, other extremity          | 440.3 | 170.728 |
| Atherosclerosis of other type of bypass graft of other extremity with rest pain                           | 440.3 | 170.728 |
| Atherosclerosis of other type of bypass graft(s) of the extremities with rest pain, other extremity       | 440.3 | 170.728 |
| Atherosclerosis of other type of bypass graft(s) of the extremities with rest pain, other extremity       |       | 170.728 |
| Atherosclerosis of other type of bypass graft of the extremities with rest pain, unspecified extremity    | 440.3 | 170.729 |
| Atherosclerosis of other type of bypass graft of extremity with rest pain                                 | 440.3 | 170.729 |
| Atherosclerosis of other type of bypass graft(s) of the extremities with rest pain, unspecified extremity | 440.3 | 170.729 |
| Atherosclerosis of other bypass graft of lower extremity with rest pain                                   | 440.3 | 170.729 |
| Atherosclerosis of other bypass graft of lower extremity with rest pain, unspecified laterality           | 440.3 | 170.729 |
| Atherosclerosis of other type of bypass graft of extremity with rest pain, unspecified extremity          | 440.3 | 170.729 |
| Atherosclerosis of other type of bypass graft(s) of the extremities with rest pain, unspecified extremity |       | 170.729 |

|                                                                                                     |                |                  |
|-----------------------------------------------------------------------------------------------------|----------------|------------------|
| Atherosclerosis of other type of bypass graft(s) of the right leg with ulceration                   |                | 170.73           |
| Athsc1 type of bypass of the right leg w ulceration of thigh                                        | 440.3          | 170.731          |
| Atherosclerosis of other type of bypass graft of right lower extremity with ulceration of thigh     | 440.3          | 170.731          |
| Atherosclerosis of other type of bypass graft(s) of the right leg with ulceration of thigh          | 440.3          | 170.731          |
| Atherosclerosis of other type of bypass graft(s) of the right leg with ulceration of thigh          |                | 170.731          |
| Atherosclerosis of other bypass graft of both lower extremities with bilateral ulceration of thigh  | 440.30, 707.11 | 170.731, 170.741 |
| Athsc1 type of bypass of the right leg w ulceration of calf                                         | 440.3          | 170.732          |
| Atherosclerosis of other type of bypass graft of right lower extremity with ulceration of calf      | 440.3          | 170.732          |
| Atherosclerosis of other type of bypass graft(s) of the right leg with ulceration of calf           | 440.3          | 170.732          |
| Atherosclerosis of other type of bypass graft(s) of the right leg with ulceration of calf           |                | 170.732          |
| Atherosclerosis of other bypass graft of both lower extremities with bilateral ulceration of calves | 440.30, 707.12 | 170.732, 170.742 |
| Athsc1 type of bypass of the right leg w ulceration of ankle                                        | 440.3          | 170.733          |
| Atherosclerosis of other type of bypass graft of right lower extremity with ulceration of ankle     | 440.3          | 170.733          |

|                                                                                                              |                |                  |
|--------------------------------------------------------------------------------------------------------------|----------------|------------------|
| Atherosclerosis of other type of bypass graft(s) of the right leg with ulceration of ankle                   | 440.3          | 170.733          |
| Atherosclerosis of other type of bypass graft(s) of the right leg with ulceration of ankle                   |                | 170.733          |
| Atherosclerosis of other bypass graft of both lower extremities with bilateral ulceration of ankles          | 440.30, 707.13 | 170.733, 170.743 |
| Atherosclerosis of other type of bypass graft of right leg w ulcer of heel and midfoot                       | 440.3          | 170.734          |
| Atherosclerosis of other type of bypass graft(s) of the right leg with ulceration of heel and midfoot        | 440.3          | 170.734          |
| Atherosclerosis of other bypass graft of right lower extremity with ulceration of heel                       | 440.30, 707.14 | 170.734          |
| Atherosclerosis of other bypass graft of right lower extremity with ulceration of midfoot                    | 440.30, 707.14 | 170.734          |
| Atherosclerosis of other type of bypass graft(s) of the right leg with ulceration of heel and midfoot        |                | 170.734          |
| Atherosclerosis of other bypass graft of both lower extremities with bilateral ulceration of midfeet         | 440.30, 707.14 | 170.734, 170.744 |
| Atherosclerosis of other bypass graft of both lower extremities with bilateral ulceration of heels           | 440.30, 707.14 | 170.734, 170.744 |
| Atherosclerosis of other type of bypass graft of right leg w ulcer oth prt foot                              | 440.3          | 170.735          |
| Atherosclerosis of other type of bypass graft of right lower extremity with ulceration of other part of foot | 440.3          | 170.735          |
| Atherosclerosis of other type of bypass graft(s) of the right leg with ulceration of other part of foot      | 440.3          | 170.735          |

|                                                                                                                       |                |                  |
|-----------------------------------------------------------------------------------------------------------------------|----------------|------------------|
| Atherosclerosis of other type of bypass graft(s) of the right leg with ulceration of other part of foot               |                | 170.735          |
| Atherosclerosis of other bypass graft of both lower extremities with bilateral ulceration of other part of feet       | 440.30, 707.15 | 170.735, 170.745 |
| Atherosclerosis of other type of bypass graft of right lower extremity with ulceration of other part of lower leg     | 440.3          | 170.738          |
| Atherosclerosis of other type of bypass graft of right lower extremity with ulceration of other part of lower leg     | 440.3          | 170.738          |
| Atherosclerosis of other type of bypass graft(s) of the right leg with ulceration of other part of lower leg          | 440.3          | 170.738          |
| Atherosclerosis of other type of bypass graft(s) of the right leg with ulceration of other part of lower leg          |                | 170.738          |
| Atherosclerosis of other bypass graft of both lower extremities with bilateral ulceration of other part of lower legs | 440.30, 707.19 | 170.738, 170.748 |
| Atherosclerosis of other type of bypass graft of right lower extremity with ulceration                                | 440.3          | 170.739          |
| Atherosclerosis of other type of bypass graft(s) of the right leg with ulceration of unspecified site                 | 440.3          | 170.739          |
| Atherosclerosis of other type of bypass graft of right lower extremity with ulceration, unspecified ulceration site   | 440.3          | 170.739          |
| Atherosclerosis of other type of bypass graft(s) of the right leg with ulceration of unspecified site                 |                | 170.739          |
| Atherosclerosis of other bypass graft of both lower extremities with bilateral ulceration                             | 440.30, 707.10 | 170.739, 170.749 |

|                                                                                                                        |                |                  |
|------------------------------------------------------------------------------------------------------------------------|----------------|------------------|
| Atherosclerosis of other bypass graft of both lower extremities with bilateral ulceration, unspecified ulceration site | 440.30, 707.10 | I70.739, I70.749 |
| Atherosclerosis of other type of bypass graft(s) of the left leg with ulceration                                       |                | I70.74           |
| Athscl type of bypass of the left leg w ulceration of thigh                                                            | 440.3          | I70.741          |
| Atherosclerosis of other type of bypass graft of left lower extremity with ulceration of thigh                         | 440.3          | I70.741          |
| Atherosclerosis of other type of bypass graft(s) of the left leg with ulceration of thigh                              | 440.3          | I70.741          |
| Atherosclerosis of other type of bypass graft(s) of the left leg with ulceration of thigh                              |                | I70.741          |
| Athscl type of bypass of the left leg w ulceration of calf                                                             | 440.3          | I70.742          |
| Atherosclerosis of other type of bypass graft of left lower extremity with ulceration of calf                          | 440.3          | I70.742          |
| Atherosclerosis of other type of bypass graft(s) of the left leg with ulceration of calf                               | 440.3          | I70.742          |
| Atherosclerosis of other type of bypass graft(s) of the left leg with ulceration of calf                               |                | I70.742          |
| Athscl type of bypass of the left leg w ulceration of ankle                                                            | 440.3          | I70.743          |
| Atherosclerosis of other type of bypass graft of left lower extremity with ulceration of ankle                         | 440.3          | I70.743          |
| Atherosclerosis of other type of bypass graft(s) of the left leg with ulceration of ankle                              | 440.3          | I70.743          |

|                                                                                                                  |                |         |
|------------------------------------------------------------------------------------------------------------------|----------------|---------|
| Atherosclerosis of other type of bypass graft(s) of the left leg with ulceration of ankle                        |                | 170.743 |
| Athscl type of bypass of left leg w ulcer of heel and midft                                                      | 440.3          | 170.744 |
| Atherosclerosis of other type of bypass graft(s) of the left leg with ulceration of heel and midfoot             | 440.3          | 170.744 |
| Atherosclerosis of other bypass graft of left lower extremity with ulceration of midfoot                         | 440.30, 707.14 | 170.744 |
| Atherosclerosis of other bypass graft of left lower extremity with ulceration of heel                            | 440.30, 707.14 | 170.744 |
| Atherosclerosis of other type of bypass graft(s) of the left leg with ulceration of heel and midfoot             |                | 170.744 |
| Athscl type of bypass of the left leg w ulcer oth prt foot                                                       | 440.3          | 170.745 |
| Atherosclerosis of other type of bypass graft of left lower extremity with ulceration of other part of foot      | 440.3          | 170.745 |
| Atherosclerosis of other type of bypass graft(s) of the left leg with ulceration of other part of foot           | 440.3          | 170.745 |
| Atherosclerosis of other type of bypass graft(s) of the left leg with ulceration of other part of foot           |                | 170.745 |
| Athscl type of bypass of left leg w ulcer oth prt low leg                                                        | 440.3          | 170.748 |
| Atherosclerosis of other type of bypass graft of left lower extremity with ulceration of other part of lower leg | 440.3          | 170.748 |
| Atherosclerosis of other type of bypass graft(s) of the left leg with ulceration of other part of lower leg      | 440.3          | 170.748 |



|                                                                                                                    |                |         |
|--------------------------------------------------------------------------------------------------------------------|----------------|---------|
| Atherosclerosis of other type of bypass graft(s) of the left leg with ulceration of other part of lower leg        |                | 170.748 |
| Athscl type of bypass of the left leg w ulcer of unsp site                                                         | 440.3          | 170.749 |
| Atherosclerosis of other type of bypass graft of left lower extremity with ulceration                              | 440.3          | 170.749 |
| Atherosclerosis of other type of bypass graft(s) of the left leg with ulceration of unspecified site               | 440.3          | 170.749 |
| Atherosclerosis of other type of bypass graft of left lower extremity with ulceration, unspecified ulceration site | 440.3          | 170.749 |
| Atherosclerosis of other type of bypass graft(s) of the left leg with ulceration of unspecified site               |                | 170.749 |
| Athscl type of bypass graft(s) of extremity w ulceration                                                           | 440.30, 707.9  | 170.75  |
| Atherosclerosis of other type of bypass graft of other extremity with ulceration                                   | 440.3          | 170.75  |
| Atherosclerosis of other type of bypass graft(s) of other extremity with ulceration                                | 440.3          | 170.75  |
| Atherosclerosis of other bypass graft of lower extremity with ulceration of other part of lower leg                | 440.30, 707.19 | 170.75  |
| Atherosclerosis of other bypass graft of lower extremity with ulceration of calf                                   | 440.30, 707.12 | 170.75  |
| Atherosclerosis of other bypass graft of lower extremity with ulceration of ankle                                  | 440.30, 707.13 | 170.75  |
| Atherosclerosis of other bypass graft of lower extremity with ulceration of heel                                   | 440.30, 707.14 | 170.75  |
| Atherosclerosis of other bypass graft of lower extremity with ulceration                                           | 440.30, 707.10 | 170.75  |
| Atherosclerosis of other bypass graft of lower extremity with ulceration of thigh                                  | 440.30, 707.11 | 170.75  |

|                                                                                                                               |                |        |
|-------------------------------------------------------------------------------------------------------------------------------|----------------|--------|
| Atherosclerosis of other bypass graft of lower extremity with ulceration of midfoot                                           | 440.30, 707.14 | 170.75 |
| Atherosclerosis of other bypass graft of lower extremity with ulceration of other part of foot                                | 440.30, 707.15 | 170.75 |
| Atherosclerosis of other bypass graft of extremity with ulceration                                                            | 440.30, 707.9  | 170.75 |
| Atherosclerosis of other bypass graft of lower extremity with ulceration of other part of foot, unspecified laterality        | 440.30, 707.15 | 170.75 |
| Atherosclerosis of other bypass graft of lower extremity with ulceration of calf, unspecified laterality                      | 440.30, 707.12 | 170.75 |
| Atherosclerosis of other bypass graft of lower extremity with ulceration of thigh, unspecified laterality                     | 440.30, 707.11 | 170.75 |
| Atherosclerosis of other bypass graft of lower extremity with ulceration of ankle, unspecified laterality                     | 440.30, 707.13 | 170.75 |
| Atherosclerosis of other bypass graft of lower extremity with ulceration, unspecified laterality, unspecified ulceration site | 440.30, 707.10 | 170.75 |
| Atherosclerosis of other bypass graft of lower extremity with ulceration of other part of lower leg, unspecified laterality   | 440.30, 707.19 | 170.75 |
| Atherosclerosis of other bypass graft of lower extremity with ulceration of midfoot, unspecified laterality                   | 440.30, 707.14 | 170.75 |
| Atherosclerosis of other bypass graft of lower extremity with ulceration of heel, unspecified laterality                      | 440.30, 707.14 | 170.75 |
| Atherosclerosis of other bypass graft of extremity with ulceration, unspecified extremity                                     | 440.30, 707.9  | 170.75 |
| Atherosclerosis of other type of bypass graft(s) of other extremity with ulceration                                           |                | 170.75 |

|                                                                                                   |       |         |
|---------------------------------------------------------------------------------------------------|-------|---------|
| Atherosclerosis of other type of bypass graft(s) of the extremities with gangrene                 |       | 170.76  |
| Athsc type of bypass of the extrm w gangrene, right leg                                           | 440.3 | 170.761 |
| Atherosclerosis of other type of bypass graft of right lower extremity with gangrene              | 440.3 | 170.761 |
| Atherosclerosis of other type of bypass graft(s) of the extremities with gangrene, right leg      | 440.3 | 170.761 |
| Atherosclerosis of other type of bypass graft(s) of the extremities with gangrene, right leg      |       | 170.761 |
| Athsc type of bypass of the extrm w gangrene, left leg                                            | 440.3 | 170.762 |
| Atherosclerosis of other type of bypass graft of left lower extremity with gangrene               | 440.3 | 170.762 |
| Atherosclerosis of other type of bypass graft(s) of the extremities with gangrene, left leg       | 440.3 | 170.762 |
| Atherosclerosis of other type of bypass graft(s) of the extremities with gangrene, left leg       |       | 170.762 |
| Athsc type of bypass of the extrm w gangrene, bi legs                                             | 440.3 | 170.763 |
| Atherosclerosis of other type of bypass graft of both lower extremities with gangrene             | 440.3 | 170.763 |
| Atherosclerosis of other type of bypass graft(s) of the extremities with gangrene, bilateral legs | 440.3 | 170.763 |
| Atherosclerosis of other type of bypass graft(s) of the extremities with gangrene, bilateral legs |       | 170.763 |
| Athsc type of bypass of the extrm w gangrene, oth extremity                                       | 440.3 | 170.768 |

|                                                                                                          |               |         |
|----------------------------------------------------------------------------------------------------------|---------------|---------|
| Atherosclerosis of other type of bypass graft of other extremity with gangrene                           | 440.3         | 170.768 |
| Atherosclerosis of other type of bypass graft(s) of the extremities with gangrene, other extremity       | 440.3         | 170.768 |
| Atherosclerosis of other type of bypass graft(s) of the extremities with gangrene, other extremity       |               | 170.768 |
| Atherosclerosis of other type of bypass graft of extremity with gangrene                                 | 440.3         | 170.769 |
| Atherosclerosis of other type of bypass graft of extremity with gangrene, unspecified extremity          | 440.3         | 170.769 |
| Atherosclerosis of other type of bypass graft of lower extremity with gangrene                           | 440.30, 785.4 | 170.769 |
| Atherosclerosis of other type of bypass graft of lower extremity with gangrene, unspecified laterality   | 440.30, 785.4 | 170.769 |
| Atherosclerosis of other type of bypass graft of extremity with gangrene, unspecified extremity          | 440.3         | 170.769 |
| Atherosclerosis of other type of bypass graft(s) of the extremities with gangrene, unspecified extremity |               | 170.769 |
| Other atherosclerosis of other type of bypass graft(s) of the extremities                                |               | 170.79  |
| Atherosclerosis of other type of bypass graft of right lower extremity with other clinical manifestation | 440.3         | 170.791 |
| Atherosclerosis of other type of bypass graft of right lower extremity with other clinical manifestation | 440.3         | 170.791 |
| Atherosclerosis of other type of bypass graft of right lower extremity with other clinical manifestation | 440.3         | 170.791 |

|                                                                                                   |       |         |
|---------------------------------------------------------------------------------------------------|-------|---------|
| Other atherosclerosis of other type of bypass graft(s) of the extremities, right leg              |       | 170.791 |
| Oth athscl type of bypass of the extremities, left leg                                            | 440.3 | 170.792 |
| Other atherosclerosis of other type of bypass graft(s) of the extremities, left leg               | 440.3 | 170.792 |
| Atherosclerosis of other bypass graft of left lower extremity with other clinical manifestation   | 440.3 | 170.792 |
| Other atherosclerosis of other type of bypass graft(s) of the extremities, left leg               |       | 170.792 |
| Oth athscl type of bypass of the extremities, bilateral legs                                      | 440.3 | 170.793 |
| Other atherosclerosis of other type of bypass graft(s) of the extremities, bilateral legs         | 440.3 | 170.793 |
| Atherosclerosis of other bypass graft of both lower extremities with other clinical manifestation | 440.3 | 170.793 |
| Other atherosclerosis of other type of bypass graft(s) of the extremities, bilateral legs         |       | 170.793 |
| Oth athscl type of bypass of the extremities, oth extremity                                       | 440.3 | 170.798 |
| Other atherosclerosis of other type of bypass graft(s) of the extremities, other extremity        | 440.3 | 170.798 |
| Atherosclerosis of other bypass graft of other extremity with other clinical manifestation        | 440.3 | 170.798 |
| Other atherosclerosis of other type of bypass graft(s) of the extremities, other extremity        |       | 170.798 |
| Oth athscl type of bypass of the extremities, unsp extremity                                      | 440.3 | 170.799 |

|                                                                                                                    |       |         |
|--------------------------------------------------------------------------------------------------------------------|-------|---------|
| Other atherosclerosis of other type of bypass graft(s) of the extremities, unspecified extremity                   | 440.3 | 170.799 |
| Atherosclerosis of other bypass graft of extremity with other clinical manifestation                               | 440.3 | 170.799 |
| Atherosclerosis of other bypass graft of lower extremity with other clinical manifestation                         | 440.3 | 170.799 |
| Atherosclerosis of other bypass graft of lower extremity with other clinical manifestation, unspecified laterality | 440.3 | 170.799 |
| Atherosclerosis of other bypass graft of extremity with other clinical manifestation, unspecified extremity        | 440.3 | 170.799 |
| Other atherosclerosis of other type of bypass graft(s) of the extremities, unspecified extremity                   |       | 170.799 |
| Atherosclerosis of other specified arteries                                                                        | 440.8 | 170.8   |
| Atherosclerosis NEC                                                                                                | 440.8 | 170.8   |
| Atherosclerosis of arteries                                                                                        | 440.8 | 170.8   |
| Stenosis of left hepatic artery                                                                                    | 440.8 | 170.8   |
| Hepatic artery stenosis, left                                                                                      | 440.8 | 170.8   |
| Stenosis of right hepatic artery                                                                                   | 440.8 | 170.8   |
| Hepatic artery stenosis, right                                                                                     | 440.8 | 170.8   |
| Atherosclerosis of hypogastric artery                                                                              | 440.8 | 170.8   |
| Hypogastric atherosclerosis                                                                                        | 440.8 | 170.8   |
| Atherosclerosis of artery                                                                                          | 440.8 | 170.8   |
| Stenosis of left hepatic artery of transplanted liver                                                              | 440.8 | 170.8   |
| Arterial atherosclerosis                                                                                           | 440.8 | 170.8   |
| Hepatic artery stenosis, left, transplanted liver                                                                  | 440.8 | 170.8   |
| Atherosclerosis of celiac artery                                                                                   | 440.8 | 170.8   |
| Celiac artery atherosclerosis                                                                                      | 440.8 | 170.8   |
| Atherosclerotic stenosis of brachiocephalic artery                                                                 | 440.8 | 170.8   |

|                                                        |               |               |
|--------------------------------------------------------|---------------|---------------|
| Atherosclerotic stenosis of innominate artery          | 440.8         | 170.8         |
| Atherosclerosis of other arteries                      | 440.8         | 170.8         |
| Atherosclerosis of right iliac artery                  | 440.8         | 170.8         |
| Atherosclerosis of both iliac arteries                 | 440.8         | 170.8         |
| Atherosclerosis of other arteries (CODE)               | 440.8         | 170.8         |
| Atherosclerosis of other arteries                      |               | 170.8         |
| Arteriosclerotic retinopathy                           | 440.8, 362.13 | 170.8, H35.09 |
| Retinal arteriosclerosis                               | 440.8, 362.13 | 170.8, H35.09 |
| Retinal artery plaque                                  | 440.8, 362.13 | 170.8, H35.09 |
| Stenosis of right hepatic artery of transplanted liver | 440.8, V42.7  | 170.8, Z94.4  |
| Other and unspecified atherosclerosis                  |               | 170.9         |
| Generalized and unspecified atherosclerosis            | 440.9         | 170.90        |
| Arteriosclerotic vascular disease                      | 440.9         | 170.90        |
| Arterial degeneration                                  | 440.9         | 170.90        |
| Arteriovascular degeneration                           | 440.9         | 170.90        |
| Vascular degeneration                                  | 440.9         | 170.90        |
| Atheroma of artery                                     | 440.9         | 170.90        |
| Endarteritis obliterans                                | 440.9         | 170.90        |
| Senile endarteritis                                    | 440.9         | 170.90        |
| Arteriosclerosis                                       | 440.9         | 170.90        |
| Atheroma                                               | 440.9         | 170.90        |
| Atheromatous plaque                                    | 440.9         | 170.90        |
| Atherosclerotic plaque                                 | 440.9         | 170.90        |
| ASO (arteriosclerosis obliterans)                      | 440.9         | 170.90        |
| Arteriosclerosis obliterans                            | 440.9         | 170.90        |
| Senile arteriosclerosis                                | 440.9         | 170.90        |
| Atherosclerosis                                        | 440.9         | 170.90        |
| Arterial vascular disease                              | 440.9         | 170.90        |
| Arterioloscleroses                                     | 440.9         | 170.90        |
| Arteriovascular disease                                | 440.9         | 170.90        |
| AS (atherosclerosis)                                   | 440.9         | 170.90        |
| Atheromatosis                                          | 440.9         | 170.90        |
| Atheromatous degeneration                              | 440.9         | 170.90        |
| Atherosclerotic vascular disease                       | 440.9         | 170.90        |

|                                                             |               |                |
|-------------------------------------------------------------|---------------|----------------|
| Endarteritis deformans                                      | 440.9         | I70.90         |
| Arterial fatty streak                                       | 440.9         | I70.90         |
| Arterial fatty streaks                                      | 440.9         | I70.90         |
| Arteriosclerosis                                            | 440.9         | I70.90         |
| Arterial occlusion due to arteriosclerosis                  | 440.9         | I70.90         |
| ASVD (arteriosclerotic vascular disease)                    | 440.9         | I70.90         |
| Class IV atherosclerotic vascular disease                   | 440.9         | I70.90         |
| Class III atherosclerotic vascular disease                  | 440.9         | I70.90         |
| Class II atherosclerotic vascular disease                   | 440.9         | I70.90         |
| Class I atherosclerotic vascular disease                    | 440.9         | I70.90         |
| Arteriosclerosis of saphenous vein                          | 440.9         | I70.90         |
| Atherosclerotic occlusive disease                           | 440.9         | I70.90         |
| Hard blood vessel                                           | 440.9         | I70.90         |
| Unspecified atherosclerosis                                 | 440.9         | I70.90         |
| Vascular hyalinosis                                         | 440.9         | I70.90         |
| Unspecified atherosclerosis                                 |               | I70.90         |
| Calcification of multiple joints and arteries               | 719.80, 440.9 | I70.90, M25.80 |
| Generalized atherosclerosis                                 | 440.9         | I70.91         |
| Atherosclerosis, generalized                                | 440.9         | I70.91         |
| Generalized atherosclerosis without gangrene                | 440.9         | I70.91         |
| Generalized atherosclerosis                                 |               | I70.91         |
| Chronic total occlusion of artery of the extremities        | 440.4         | I70.92         |
| Complete occlusion of artery of the extremities             | 440.4         | I70.92         |
| Total occlusion of artery of the extremities                | 440.4         | I70.92         |
| Extremity artery chronic total occlusion                    | 440.4         | I70.92         |
| Chronic total occlusion of artery of extremity              | 440.4         | I70.92         |
| Chronic total occlusion of artery of the extremities (CODE) | 440.4         | I70.92         |
| Chronic total occlusion of artery of the extremities        |               | I70.92         |
| Intramural aortic hematoma                                  | 441           | I71.00         |



|                                                  |        |        |
|--------------------------------------------------|--------|--------|
| Dissection of aorta, abdominal                   | 441.02 | I71.02 |
| Dissecting aortic aneurysm (any part), abdominal | 441.02 | I71.02 |
| Dissecting aortic aneurysm, abdominal            | 441.02 | I71.02 |
| Dissection of abdominal aorta                    | 441.02 | I71.02 |
| Dissecting abdominal aortic aneurysm             | 441.02 | I71.02 |
| Dissecting AAA (abdominal aortic aneurysm)       | 441.02 | I71.02 |
| Aortic dissection, abdominal                     | 441.02 | I71.02 |
| Abdominal aortic aneurysm dissection             | 441.02 | I71.02 |
| Dissecting abdominal aortic aneurysm (AAA)       | 441.02 | I71.02 |
| Dissection of abdominal aorta                    |        | I71.02 |
| Abdominal aneurysm, ruptured                     | 441.3  | I71.3  |
| Ruptured abdominal aortic aneurysm               | 441.3  | I71.3  |
| Aneurysm, abdominal aorta, ruptured              | 441.3  | I71.3  |
| Aneurysm, aorta, abdominal, ruptured             | 441.3  | I71.3  |
| AAA (abdominal aortic aneurysm, ruptured)        | 441.3  | I71.3  |
| RAAA (ruptured abdominal aortic aneurysm)        | 441.3  | I71.3  |
| Abdominal aortic aneurysm, ruptured              | 441.3  | I71.3  |
| Abdominal aortic aneurysm rupture                | 441.3  | I71.3  |
| Aneurysm, abdominal aortic, with rupture         | 441.3  | I71.3  |
| Ruptured abdominal aortic aneurysm (AAA)         | 441.3  | I71.3  |
| Abdominal aortic aneurysm, ruptured              |        | I71.3  |
| Abdominal aneurysm without mention of rupture    | 441.4  | I71.4  |
| Abdominal aortic aneurysm without rupture        | 441.4  | I71.4  |
| Abdominal aortic aneurysm                        | 441.4  | I71.4  |
| Aneurysm, abdominal aortic                       | 441.4  | I71.4  |
| Aortic aneurysm, abdominal                       | 441.4  | I71.4  |
| AAA (abdominal aortic aneurysm)                  | 441.4  | I71.4  |
| Abdominal aneurysm                               | 441.4  | I71.4  |

|                                                             |       |       |
|-------------------------------------------------------------|-------|-------|
| AAA (abdominal aortic aneurysm) without rupture             | 441.4 | I71.4 |
| Enlarging abdominal aortic aneurysm                         | 441.4 | I71.4 |
| Abdominal aortic aneurysm without mention of rupture        | 441.4 | I71.4 |
| Leaking abdominal aortic aneurysm                           | 441.4 | I71.4 |
| Aneurysm of abdominal aorta                                 | 441.4 | I71.4 |
| Aneurysm of supraceliac aorta                               | 441.4 | I71.4 |
| Supraceliac aortic aneurysm                                 | 441.4 | I71.4 |
| Suprarenal aortic aneurysm                                  | 441.4 | I71.4 |
| Aneurysm of infrarenal abdominal aorta                      | 441.4 | I71.4 |
| Inflammatory abdominal aortic aneurysm                      | 441.4 | I71.4 |
| Recurrent abdominal aortic aneurysm                         | 441.4 | I71.4 |
| Aneurysm of suprarenal aorta                                | 441.4 | I71.4 |
| Abdominal aortic aneurysm, not a candidate for repair       | 441.4 | I71.4 |
| AAA (abdominal aortic aneurysm), not a candidate for repair | 441.4 | I71.4 |
| Aneurysm of abdominal aorta branch vessel                   | 441.4 | I71.4 |
| Abdominal aortic aneurysm greater than 39 mm in diameter    | 441.4 | I71.4 |
| Abdominal aortic aneurysm 35 to 39 mm in diameter           | 441.4 | I71.4 |
| Abdominal aortic aneurysm 30 to 34 mm in diameter           | 441.4 | I71.4 |
| Abdominal aortic aneurysm (AAA), 30-34 mm diameter          | 441.4 | I71.4 |
| Abdominal aortic aneurysm (AAA), 35-39 mm diameter          | 441.4 | I71.4 |
| Abdominal aortic aneurysm (AAA) >39 mm diameter             | 441.4 | I71.4 |
| Aneurysm of abdominal vessel                                | 441.4 | I71.4 |
| Abdominal aortic aneurysm, without rupture                  | 441.4 | I71.4 |
| Abdominal aortic aneurysm (AAA)                             | 441.4 | I71.4 |

|                                                                           |        |        |
|---------------------------------------------------------------------------|--------|--------|
| Abdominal aortic aneurysm (AAA) without rupture                           | 441.4  | 171.4  |
| Abdominal aortic aneurysm (AAA) 30 to 34 mm in diameter                   | 441.4  | 171.4  |
| Abdominal aortic aneurysm (AAA), not a candidate for repair               | 441.4  | 171.4  |
| Abdominal aortic aneurysm (AAA) greater than 39 mm in diameter            | 441.4  | 171.4  |
| Enlarging abdominal aortic aneurysm (AAA)                                 | 441.4  | 171.4  |
| Leaking abdominal aortic aneurysm (AAA)                                   | 441.4  | 171.4  |
| Recurrent abdominal aortic aneurysm (AAA)                                 | 441.4  | 171.4  |
| Abdominal aortic aneurysm (AAA) 35 to 39 mm in diameter                   | 441.4  | 171.4  |
| Abdominal aortic aneurysm (AAA) greater than 5.0 cm in diameter in female | 441.4  | 171.4  |
| Abdominal aortic aneurysm (AAA) 3.0 cm to 5.5 cm in diameter in male      | 441.4  | 171.4  |
| Abdominal aortic aneurysm (AAA) 3.0 cm to 5.0 cm in diameter in female    | 441.4  | 171.4  |
| Abdominal aortic aneurysm (AAA) greater than 5.5 cm in diameter in male   | 441.4  | 171.4  |
| Abdominal aortic aneurysm, without rupture                                |        | 171.4  |
| Penetrating ulcer of aorta                                                | 441.9  | 171.9  |
| Other specified peripheral vascular diseases                              |        | 173.8  |
| Other peripheral vascular disease(443.89)                                 | 443.89 | 173.89 |
| Other specified peripheral vascular diseases (CODE)                       | 443.89 | 173.89 |
| Other specified peripheral vascular diseases                              |        | 173.89 |
| Peripheral vascular disease, unspecified                                  | 443.9  | 173.9  |
| Intermittent claudication                                                 | 443.9  | 173.9  |
| Claudication, intermittent                                                | 443.9  | 173.9  |
| Peripheral vascular disease                                               | 443.9  | 173.9  |

|                                                        |       |       |
|--------------------------------------------------------|-------|-------|
| Peripheral vascular disorder                           | 443.9 | 173.9 |
| Vascular disease, peripheral                           | 443.9 | 173.9 |
| PVD (peripheral vascular disease)                      | 443.9 | 173.9 |
| Claudication                                           | 443.9 | 173.9 |
| IC (intermittent claudication)                         | 443.9 | 173.9 |
| Asymptomatic peripheral vascular disease               | 443.9 | 173.9 |
| Asymptomatic PVD (peripheral vascular disease)         | 443.9 | 173.9 |
| Peripheral vascular disease with claudication          | 443.9 | 173.9 |
| PVD (peripheral vascular disease) with claudication    | 443.9 | 173.9 |
| Peripheral arterial disease                            | 443.9 | 173.9 |
| PAD (peripheral artery disease)                        | 443.9 | 173.9 |
| Peripheral vascular occlusive disease                  | 443.9 | 173.9 |
| Peripheral vascular obstructive disease                | 443.9 | 173.9 |
| Lower extremity arterial insufficiency, severe, right  | 443.9 | 173.9 |
| Severe arterial insufficiency of left lower extremity  | 443.9 | 173.9 |
| Severe arterial insufficiency of right lower extremity | 443.9 | 173.9 |
| Lower extremity arterial insufficiency, severe, left   | 443.9 | 173.9 |
| Peripheral artery insufficiency                        | 443.9 | 173.9 |
| Insufficiency, arterial, peripheral                    | 443.9 | 173.9 |
| Peripheral artery disease                              | 443.9 | 173.9 |
| Claudication of gluteal region                         | 443.9 | 173.9 |
| Gluteal claudication                                   | 443.9 | 173.9 |
| Femoro-popliteal artery disease                        | 443.9 | 173.9 |
| Peripheral venous engorgement                          | 443.9 | 173.9 |
| Vascular claudication                                  | 443.9 | 173.9 |
| Peripheral vascular disease, asymptomatic              | 443.9 | 173.9 |
| Peripheral artery vasospasm                            | 443.9 | 173.9 |
| Vasospasm of peripheral artery                         | 443.9 | 173.9 |

|                                                                 |        |       |
|-----------------------------------------------------------------|--------|-------|
| Claudication in peripheral vascular disease                     | 443.9  | 173.9 |
| Posterior tibial artery insufficiency                           | 443.9  | 173.9 |
| Arterial insufficiency, posterior tibial                        | 443.9  | 173.9 |
| Peripheral vascular disease with pain at rest                   | 443.9  | 173.9 |
| Secondary peripheral vascular disease                           | 443.81 | 173.9 |
| Peripheral vascular disease, secondary                          | 443.81 | 173.9 |
| Claudication of calf muscles                                    | 443.9  | 173.9 |
| Bilateral claudication of lower limb                            | 443.9  | 173.9 |
| Ischemic rest pain of lower extremity                           | 443.9  | 173.9 |
| Class IV claudication                                           | 443.9  | 173.9 |
| Claudication, class IV                                          | 443.9  | 173.9 |
| Severe claudication                                             | 443.9  | 173.9 |
| Claudication, class III                                         | 443.9  | 173.9 |
| Moderate claudication                                           | 443.9  | 173.9 |
| Claudication, class II                                          | 443.9  | 173.9 |
| Class II claudication                                           | 443.9  | 173.9 |
| Mild claudication                                               | 443.9  | 173.9 |
| Class I claudication                                            | 443.9  | 173.9 |
| Claudication, class I                                           | 443.9  | 173.9 |
| Peripheral vascular insufficiency                               | 443.9  | 173.9 |
| Right leg claudication                                          | 443.9  | 173.9 |
| Claudication of right lower extremity                           | 443.9  | 173.9 |
| Cold foot with peripheral vascular disease                      | 443.9  | 173.9 |
| Left leg claudication                                           | 443.9  | 173.9 |
| Claudication of left lower extremity                            | 443.9  | 173.9 |
| Dysvascular foot                                                | 443.9  | 173.9 |
| Peripheral vascular disease of foot                             | 443.9  | 173.9 |
| Vascular disorder of extremity                                  | 443.9  | 173.9 |
| Claudication of lower extremity                                 | 443.9  | 173.9 |
| Peripheral neurovascular dysfunction                            | 443.9  | 173.9 |
| Peripheral vasodilation                                         | 443.9  | 173.9 |
| Peripheral vascular disease with cramping and inability to walk | 443.9  | 173.9 |
| Peripheral vascular disease of extremity                        | 443.9  | 173.9 |

|                                                                                                |                      |                       |
|------------------------------------------------------------------------------------------------|----------------------|-----------------------|
| Peripheral vascular disease of extremity with claudication                                     | 443.9                | I73.9                 |
| Peripheral vascular disease of lower extremity                                                 | 443.9                | I73.9                 |
| Severe peripheral arterial disease                                                             | 443.9                | I73.9                 |
| Arterial insufficiency of lower extremity                                                      | 443.9                | I73.9                 |
| Poor peripheral circulation                                                                    | 443.9                | I73.9                 |
| Claudication of both lower extremities                                                         | 443.9                | I73.9                 |
| Gangrene due to arterial insufficiency                                                         | 443.9, 785.4         | I73.9                 |
| Ischemic foot pain at rest                                                                     | 443.9                | I73.9                 |
| Ischemic foot pain when walking                                                                | 443.9                | I73.9                 |
| Ischemic pain of foot at rest                                                                  | 443.9                | I73.9                 |
| Pain of foot due to ischemia when walking                                                      | 443.9                | I73.9                 |
| Claudication of upper extremity                                                                | 443.9                | I73.9                 |
| Cutaneous collagenous vasculopathy                                                             | 443.9                | I73.9                 |
| Peripheral vascular disease, unspecified                                                       |                      | I73.9                 |
| Neuropathy due to peripheral vascular disease                                                  | 357.4                | I73.9, G63            |
| Tissue necrosis with gangrene in peripheral vascular disease                                   | 443.9, 785.4         | I73.9, I96            |
| Peripheral vascular disease of lower extremity with ulceration                                 | 443.9, 707.10        | I73.9, L97.909        |
| Atherosclerosis of native arteries of the extremities with ulceration(440.23)                  | 440.23               | I73.9, L98.499        |
| Loss of protective sensation of skin of deformed foot with peripheral vascular disease of foot | 443.9, 782.0, 736.70 | I73.9, M21.969, R20.8 |
| Loss of protective sensation of skin of foot with peripheral vascular disease of foot          | 443.9, 782.0         | I73.9, R20.8          |
| Arterial insufficiency                                                                         | 447.1                | I77.1                 |
| Arterial stenosis                                                                              | 447.1                | I77.1                 |
| Artery stenosis                                                                                | 447.1                | I77.1                 |
| Stenosis of artery                                                                             | 447.1                | I77.1                 |
| Stenosis of hepatic artery                                                                     | 447.1                | I77.1                 |
| Stenosis of radial artery                                                                      | 447.1                | I77.1                 |

|                                          |       |       |
|------------------------------------------|-------|-------|
| Radial artery stenosis                   | 447.1 | 177.1 |
| Narrowing of femoral artery in both legs | 447.1 | 177.1 |
| Stenosis of left subclavian artery       | 447.1 | 177.1 |
| Subclavian artery stenosis, left         | 447.1 | 177.1 |
| Stenosis of right subclavian artery      | 447.1 | 177.1 |
| Subclavian artery stenosis, right        | 447.1 | 177.1 |
| Stenosis of pancreatic artery            | 447.1 | 177.1 |
| Pancreas artery stenosis                 | 447.1 | 177.1 |
| Diffuse narrowing of hepatic artery      | 447.1 | 177.1 |
| Hepatic artery, diffuse narrowing        | 447.1 | 177.1 |
| Stenosis of brachiocephalic artery       | 447.1 | 177.1 |
| Stenosis of left brachiocephalic artery  | 447.1 | 177.1 |
| Brachiocephalic artery stenosis, left    | 447.1 | 177.1 |
| Stenosis of right brachiocephalic artery | 447.1 | 177.1 |
| Brachiocephalic artery stenosis, right   | 447.1 | 177.1 |
| Superior mesenteric artery stenosis      | 557.1 | 177.1 |
| Stenosis of iliac artery                 | 447.1 | 177.1 |
| Stenosis of left iliac artery            | 447.1 | 177.1 |
| Iliac artery stenosis, left              | 447.1 | 177.1 |
| Stenosis of right iliac artery           | 447.1 | 177.1 |
| Iliac artery stenosis, right             | 447.1 | 177.1 |
| Bilateral iliac artery stenosis          | 447.1 | 177.1 |
| Iliac artery stenosis, bilateral         | 447.1 | 177.1 |
| Bilateral pelvic artery narrowing        | 447.1 | 177.1 |
| SMA stenosis                             | 557.1 | 177.1 |
| Subclavian artery stenosis               | 447.1 | 177.1 |
| Subclavian arterial stenosis             | 447.1 | 177.1 |
| Stenosis of subclavian artery            | 447.1 | 177.1 |
| Arterial occlusion due to stenosis       | 447.1 | 177.1 |
| Right iliac artery stenosis              | 447.1 | 177.1 |
| Hepatic artery stenosis                  | 447.1 | 177.1 |
| Innominate artery stenosis               | 447.1 | 177.1 |
| Stenosis of artery in neck               | 447.1 | 177.1 |
| Narrowing of artery in neck              | 447.1 | 177.1 |
| Kinking of left iliac artery             | 447.1 | 177.1 |
| Stenosis of artery of abdomen            | 447.1 | 177.1 |

|                                                                                             |                |                  |
|---------------------------------------------------------------------------------------------|----------------|------------------|
| Stenosis of iliac artery, unspecified laterality                                            | 447.1          | I77.1            |
| Stricture of artery                                                                         |                | I77.1            |
| Arterial insufficiency with ischemic ulcer                                                  | 447.1, 707.9   | I77.1, I98.499   |
| Carotid ulcer                                                                               | 447.2, 433.10  | I77.2, I65.29    |
| Deep venous thrombosis associated with coronary artery bypass graft, right                  | 453.40, 414.04 | I82.401, I25.810 |
| Deep vein thrombosis associated with coronary artery bypass graft, right                    | 453.40, 414.04 | I82.401, I25.810 |
| Deep venous thrombosis associated with coronary artery bypass graft, left                   | 453.40, 414.04 | I82.402, I25.810 |
| Deep vein thrombosis associated with coronary artery bypass graft, left                     | 453.40, 414.04 | I82.402, I25.810 |
| Deep vein thrombosis associated with coronary artery bypass graft, bilateral                | 453.40, 414.04 | I82.403, I25.810 |
| Deep venous thrombosis associated with coronary artery bypass graft, bilateral              | 453.40, 414.04 | I82.403, I25.810 |
| Deep venous thrombosis associated with coronary artery bypass graft, unspecified laterality | 453.40, 414.04 | I82.409, I25.810 |
| Deep vein thrombosis associated with coronary artery bypass graft, unspecified laterality   | 453.40, 414.04 | I82.409, I25.810 |
| Gangrene of right lower extremity due to atherosclerosis                                    | 785.4, 440.20  | I96, I70.201     |
| Gangrene of left lower extremity due to atherosclerosis                                     | 785.4, 440.20  | I96, I70.202     |
| Gangrene due to peripheral vascular disease                                                 | 785.4, 443.9   | I96, I73.9       |
| Acute myocardial infarction, true posterior wall infarction, subsequent episode of care     | 410.62         | IMO0001          |
| Acute coronary occlusion without myocardial infarction                                      | 411.81         | IMO0001          |
| Maternal coronary artery disease                                                            | IMO0001        | IMO0001          |



|                                                                                                       |         |         |
|-------------------------------------------------------------------------------------------------------|---------|---------|
| Acute non-ST segment elevation myocardial infarction (STEMI) following previous myocardial infarction | IMO0001 | IMO0001 |
| Aphasic stroke                                                                                        | IMO0002 | IMO0002 |
| Stroke syndrome                                                                                       | IMO0002 | IMO0002 |
| Apraxia due to cerebrovascular accident                                                               | IMO0002 | IMO0002 |
| Apraxia due to stroke                                                                                 | IMO0002 | IMO0002 |
| Aphasia with stroke                                                                                   | IMO0002 | IMO0002 |
| Aphasia due to stroke                                                                                 | IMO0002 | IMO0002 |
| Cognitive dysfunction due to stroke                                                                   | IMO0002 | IMO0002 |
| Stroke-related cognitive dysfunction                                                                  | IMO0002 | IMO0002 |
| Cognitive deficit due to multiple subcortical infarcts                                                | IMO0002 | IMO0002 |
| Mood disorder due to cerebrovascular accident                                                         | IMO0002 | IMO0002 |
| Mood disorder due to stroke                                                                           | IMO0002 | IMO0002 |
| Dysarthria due to cerebrovascular accident                                                            | IMO0002 | IMO0002 |
| Monoplegia, upper extremity, post-stroke                                                              | IMO0002 | IMO0002 |
| Monoplegia, dominant upper extremity, post-stroke                                                     | IMO0002 | IMO0002 |
| Monoplegia, non-dominant upper extremity, post-stroke                                                 | IMO0002 | IMO0002 |
| Monoplegia, non-dominant lower extremity, post-stroke                                                 | IMO0002 | IMO0002 |
| Lack of coordination due to stroke                                                                    | IMO0002 | IMO0002 |
| Altered sensation due to stroke                                                                       | IMO0002 | IMO0002 |
| Bilateral paralysis complicating stroke                                                               | IMO0002 | IMO0002 |
| Apraxia complicating stroke                                                                           | IMO0002 | IMO0002 |
| Monoplegia of non-dominant leg as complication of stroke                                              | IMO0002 | IMO0002 |
| Monoplegia of arm as complication of stroke                                                           | IMO0002 | IMO0002 |
| Monoplegia of dominant arm as complication of stroke                                                  | IMO0002 | IMO0002 |
| Monoplegia of dominant leg as complication of stroke                                                  | IMO0002 | IMO0002 |

|                                                                                     |                |         |
|-------------------------------------------------------------------------------------|----------------|---------|
| Monoplegia of leg as complication of stroke                                         | IMO0002        | IMO0002 |
| Monoplegia of non-dominant arm as complication of stroke                            | IMO0002        | IMO0002 |
| Nondominant hemiplegia as complication of stroke                                    | 434.91, 342.92 | IMO0002 |
| Paralysis as complication of stroke                                                 | IMO0002        | IMO0002 |
| Paralysis of nondominant side as complication of stroke                             | IMO0002        | IMO0002 |
| Depression due to stroke                                                            | IMO0002        | IMO0002 |
| Personality change due to cerebrovascular accident                                  | IMO0002        | IMO0002 |
| Personality change due to stroke                                                    | IMO0002        | IMO0002 |
| Aphasia complicating stroke                                                         | IMO0002        | IMO0002 |
| Dysarthria due to cerebellar stroke                                                 | IMO0002        | IMO0002 |
| Cerebrovascular accident with cognitive communication deficit                       | IMO0002        | IMO0002 |
| Weakness due to cerebrovascular accident                                            | IMO0002        | IMO0002 |
| Neurological deficit due to ischemic stroke                                         | IMO0002        | IMO0002 |
| Combined receptive and expressive aphasia due to cerebrovascular accident           | IMO0002        | IMO0002 |
| Combined receptive and expressive aphasia due to stroke                             | IMO0002        | IMO0002 |
| Unilateral paralysis due to cerebrovascular accident                                | IMO0002        | IMO0002 |
| Monoplegia of lower extremity affecting dominant side as complication of stroke     | IMO0002        | IMO0002 |
| Monoplegia of lower extremity as complication of stroke                             | IMO0002        | IMO0002 |
| Monoplegia of lower extremity affecting non-dominant side as complication of stroke | IMO0002        | IMO0002 |
| Monoplegia of upper extremity affecting non-dominant side as complication of stroke | IMO0002        | IMO0002 |

|                                                                                   |                |         |
|-----------------------------------------------------------------------------------|----------------|---------|
| Monoplegia of upper extremity as complication of stroke                           | IMO0002        | IMO0002 |
| Monoplegia of upper extremity affecting dominant side as complication of stroke   | IMO0002        | IMO0002 |
| Nonintractable persistent migraine aura with cerebral infarction                  | IMO0002        | IMO0002 |
| Dysarthria due to cerebrovascular accident (CVA)                                  | IMO0002        | IMO0002 |
| Mood disorder due to cerebrovascular accident (CVA)                               | IMO0002        | IMO0002 |
| Personality change due to cerebrovascular accident (CVA)                          | IMO0002        | IMO0002 |
| Apraxia due to cerebrovascular accident (CVA)                                     | IMO0002        | IMO0002 |
| Combined receptive and expressive aphasia due to cerebrovascular accident (CVA)   | IMO0002        | IMO0002 |
| Cerebrovascular accident (CVA) with cognitive communication deficit               | IMO0002        | IMO0002 |
| Weakness due to cerebrovascular accident (CVA)                                    | IMO0002        | IMO0002 |
| Unilateral paralysis due to cerebrovascular accident (CVA)                        | IMO0002        | IMO0002 |
| Paralysis of face due to cerebrovascular accident (CVA)                           | 438.5          | IMO0002 |
| Facial paralysis due to stroke                                                    | 438.5          | IMO0002 |
| Hemiplegia of non-dominant side as complication of cerebrovascular accident (CVA) | 434.91, 342.92 | IMO0002 |
| Spastic hemiplegia of right nondominant side due to infarction of brain           | IMO0002        | IMO0002 |
| Hemiparesis due to cerebral infarction                                            | 438.2          | IMO0002 |
| Spastic hemiparesis due to cerebral infarction                                    | IMO0002        | IMO0002 |
| Hemiparesis of left dominant side due to cerebral infarction                      | 438.21         | IMO0002 |

|                                                                          |               |         |
|--------------------------------------------------------------------------|---------------|---------|
| Spastic hemiparesis of left nondominant side due to cerebral infarction  | IMO0002       | IMO0002 |
| Spastic hemiparesis of left dominant side due to cerebral infarction     | IMO0002       | IMO0002 |
| Hemiparesis of right dominant side due to cerebral infarction            | 438.21        | IMO0002 |
| Hemiparesis of right nondominant side due to cerebral infarction         | 438.22        | IMO0002 |
| Hemiparesis of left nondominant side due to cerebral infarction          | 438.22        | IMO0002 |
| Spastic hemiparesis of right dominant side due to cerebral infarction    | IMO0002       | IMO0002 |
| Spastic hemiparesis of right nondominant side due to cerebral infarction | IMO0002       | IMO0002 |
| Facial droop due to stroke                                               | IMO0002       | IMO0002 |
| Hemiplegia, nondominant side S/P CVA (cerebrovascular accident)          | IMO0002       | IMO0002 |
| Hemiplegia of nondominant side following cerebrovascular accident        | IMO0002       | IMO0002 |
| Hemiplegia affecting non-dominant side, post-stroke                      | IMO0002       | IMO0002 |
| Hemiplegia of nondominant side following CVA (cerebrovascular accident)  | IMO0002       | IMO0002 |
| Hemiplegia of non-dominant side following cerebrovascular accident (CVA) | IMO0002       | IMO0002 |
| Monoplegia, upper limb, S/P CVA (cerebrovascular accident)               | IMO0002       | IMO0002 |
| Monoplegia of upper limb following cerebrovascular accident              | IMO0002       | IMO0002 |
| Monoplegia of upper limb following CVA (cerebrovascular accident)        | IMO0002       | IMO0002 |
| CVA, old, monoplegia upper limb                                          | IMO0002       | IMO0002 |
| Monoplegia of upper extremity following cerebrovascular accident         | IMO0002       | IMO0002 |
| Monoplegia of upper extremity following cerebrovascular accident (CVA)   | IMO0002       | IMO0002 |
| Postoperative myocardial infarction                                      | 997.1, 410.90 | IMO0002 |

|                                                       |       |       |
|-------------------------------------------------------|-------|-------|
| Chronic vascular insufficiency of intestine           | 557.1 | K55.1 |
| Chronic intestinal ischemic syndrome                  | 557.1 | K55.1 |
| Chronic ischemic colitis                              | 557.1 | K55.1 |
| Chronic ischemic enteritis                            | 557.1 | K55.1 |
| Chronic ischemic enterocolitis                        | 557.1 | K55.1 |
| Ischemic stricture of intestine                       | 557.1 | K55.1 |
| Mesenteric vascular insufficiency                     | 557.1 | K55.1 |
| Abdominal angina                                      | 557.1 | K55.1 |
| Intestinal angina                                     | 557.1 | K55.1 |
| Mesenteric angina                                     | 557.1 | K55.1 |
| Superior mesenteric artery syndrome                   | 557.1 | K55.1 |
| Chronic mesenteric arterial insufficiency syndrome    | 557.1 | K55.1 |
| Mesenteric vascular insufficiency syndrome            | 557.1 | K55.1 |
| Angina syndrome, abdominal                            | 557.1 | K55.1 |
| Angina, intestinal                                    | 557.1 | K55.1 |
| Arteriomesenteric duodenal ileus                      | 557.1 | K55.1 |
| Cast syndrome                                         | 557.1 | K55.1 |
| Duodenum, occlusion by superior mesenteric artery     | 557.1 | K55.1 |
| Duodenum, vascular compression                        | 557.1 | K55.1 |
| Mesenteric duodenal compression syndrome              | 557.1 | K55.1 |
| Chronic ischemic colitis, enteritis, or enterocolitis | 557.1 | K55.1 |
| Angina mesenteric                                     | 557.1 | K55.1 |
| Mesenteric artery syndrome (superior)                 | 557.1 | K55.1 |
| Chronic intestinal ischemia                           | 557.1 | K55.1 |
| Chronic intestinal vascular insufficiency             | 557.1 | K55.1 |
| Chronic mesenteric ischemia                           | 557.1 | K55.1 |
| CMI (chronic mesenteric ischemia)                     | 557.1 | K55.1 |
| Mesenteric vascular insufficiency, chronic            | 557.1 | K55.1 |
| Insufficient, vascular, mesenteric                    | 557.1 | K55.1 |
| Ischemic stricture intestine                          | 557.1 | K55.1 |
| SMAS (superior mesenteric artery syndrome)            | 557.1 | K55.1 |

|                                                                           |       |       |
|---------------------------------------------------------------------------|-------|-------|
| Stricture, intestine, ischemic                                            | 557.1 | K55.1 |
| Intestinal vascular insufficiency, chronic                                | 557.1 | K55.1 |
| Mesenteric artery stenosis                                                | 557.1 | K55.1 |
| Mesenteric artery insufficiency                                           | 557   | K55.1 |
| Arteriosclerosis of mesenteric artery                                     | 557.1 | K55.1 |
| Mesenteric ischemia, chronic                                              | 557.1 | K55.1 |
| Arteriosclerosis, mesenteric artery                                       | 557.1 | K55.1 |
| Chronic vascular disorders of intestine                                   | 557.1 | K55.1 |
| Superior mesenteric artery atherosclerosis                                | 557.1 | K55.1 |
| Atherosclerosis of superior mesenteric artery                             | 557.1 | K55.1 |
| Chronic mesenteric insufficiency                                          | 557.1 | K55.1 |
| Chronic intermittent arteriomesenteric occlusion of the duodenum syndrome | 557.1 | K55.1 |
| Chronic vascular disorder of intestine                                    | 557.1 | K55.1 |
| Chronic thrombosis of mesenteric vein                                     | 557.1 | K55.1 |
| Stenosis of inferior mesenteric artery                                    | 557.1 | K55.1 |
| Chronic vascular disorders of intestine                                   |       | K55.1 |
| Other vascular disorders of intestine                                     | 557.9 | K55.8 |
| Unspecified vascular insufficiency of intestine                           | 557.9 | K55.9 |
| Vascular insufficiency of intestine                                       | 557.9 | K55.9 |
| Ischemic bowel disease                                                    | 557.9 | K55.9 |
| Ischemic enterocolitis                                                    | 557.9 | K55.9 |
| Alimentary tract pain due to vascular insufficiency                       | 557.9 | K55.9 |
| Acute ischemic enterocolitis                                              | 557   | K55.9 |
| Colitis, ischemic                                                         | 557.9 | K55.9 |
| Ischemic colitis                                                          | 557.9 | K55.9 |
| Mesenteric vascular insufficiency, acute                                  | 557   | K55.9 |
| Intestinal ischemia                                                       | 557.9 | K55.9 |
| Ischemia, bowel                                                           | 557.9 | K55.9 |
| Ischemia, intestine                                                       | 557.9 | K55.9 |
| Enteritis, ischemic                                                       | 557.9 | K55.9 |
| Ischemic enteritis                                                        | 557.9 | K55.9 |

|                                                                                      |                |                 |
|--------------------------------------------------------------------------------------|----------------|-----------------|
| Alimentary pain due to vascular insufficiency                                        | 557.9          | K55.9           |
| Ischemic colitis, enteritis, or enterocolitis                                        | 557.9          | K55.9           |
| Ischemic disease of gut                                                              | 557.9          | K55.9           |
| Colonic ischemia                                                                     | 557.9          | K55.9           |
| Ischemic colon                                                                       | 557.9          | K55.9           |
| Vascular disorder of intestine                                                       | 569.9          | K55.9           |
| Intestinal vascular insufficiency                                                    | 557.9          | K55.9           |
| Ischemic bowel syndrome                                                              | 557.9          | K55.9           |
| Digestive tract pain due to vascular insufficiency                                   | 557.9          | K55.9           |
| Ischemia of large intestine                                                          | 557.9          | K55.9           |
| Large bowel ischemia                                                                 | 557.9          | K55.9           |
| Ischemia of small intestine                                                          | 557.9          | K55.9           |
| Small bowel ischemia                                                                 | 557.9          | K55.9           |
| Mesenteric ischemia                                                                  | 557.9          | K55.9           |
| Acute vascular disorder of intestine                                                 | 569.9          | K55.9           |
| Acute mesenteric insufficiency                                                       | 557            | K55.9           |
| Vascular disorder of intestine, unspecified                                          | 569.9          | K55.9           |
| Acute vascular disorders of intestine                                                | 569.9          | K55.9           |
| Ischemic gastroenteritis                                                             | 557.9          | K55.9           |
| Vascular disorder of intestine, unspecified                                          |                | K55.9           |
| Small bowel ischemia related to hypovolemia                                          | 557.9, 276.52  | K55.9, E86.1    |
| Maternal coronary artery disease complicating pregnancy, first trimester             | 648.63, 414.00 | O99.411, I25.10 |
| Maternal coronary artery disease, first trimester                                    | 674.03         | O99.411, I25.10 |
| Maternal coronary artery disease complicating pregnancy in first trimester           | 648.63, 414.00 | O99.411, I25.10 |
| Maternal coronary artery disease affecting pregnancy, antepartum, first trimester    | 648.63, 414.00 | O99.411, I25.10 |
| Coronary artery disease in mother affecting pregnancy in first trimester, antepartum | 648.63, 414.00 | O99.411, I25.10 |

|                                                                                                           |                |                 |
|-----------------------------------------------------------------------------------------------------------|----------------|-----------------|
| Cerebrovascular disorder occurring in pregnancy, childbirth, or the puerperium, first trimester           | 674.03         | O99.411, I67.9  |
| Cerebrovascular disorder, obstetric, delivered, first trimester                                           | 674.03         | O99.411, I67.9  |
| Cerebrovascular disorder, obstetric, antepartum, first trimester                                          | 674.03         | O99.411, I67.9  |
| Cerebrovascular disorder, obstetric, first trimester                                                      | 674.03         | O99.411, I67.9  |
| Antepartum cerebrovascular disorder, first trimester                                                      | 674.03         | O99.411, I67.9  |
| Cerebrovascular disorder, antepartum, first trimester                                                     | 674.03         | O99.411, I67.9  |
| Cerebrovascular disorder in pregnancy, childbirth, or the puerperium, first trimester                     | 674.03         | O99.411, I67.9  |
| Cerebrovascular disorder, with delivery, first trimester                                                  | 674.03         | O99.411, I67.9  |
| Cerebrovascular disorder, with delivery, with or without mention of antepartum condition, first trimester | 674.03         | O99.411, I67.9  |
| Antepartum cerebrovascular disorder in first trimester                                                    | 674.03         | O99.411, I67.9  |
| Cerebrovascular disorder affecting pregnancy in first trimester                                           | 674.03, 437.9  | O99.411, I67.9  |
| Cerebrovascular disorder affecting pregnancy, first trimester                                             | 674.03, 437.9  | O99.411, I67.9  |
| Maternal coronary artery disease, second trimester                                                        | 674.03         | O99.412, I25.10 |
| Maternal coronary artery disease complicating pregnancy, second trimester                                 | 648.63, 414.00 | O99.412, I25.10 |
| Maternal coronary artery disease complicating pregnancy in second trimester                               | 648.63, 414.00 | O99.412, I25.10 |
| Maternal coronary artery disease affecting pregnancy in second trimester, antepartum                      | 648.63, 414.00 | O99.412, I25.10 |



|                                                                                                            |                |                 |
|------------------------------------------------------------------------------------------------------------|----------------|-----------------|
| Maternal coronary artery disease affecting pregnancy, antepartum, second trimester                         | 648.63, 414.00 | O99.412, I25.10 |
| Cerebrovascular disorder occurring in pregnancy, childbirth, or the puerperium, second trimester           | 674.03         | O99.412, I67.9  |
| Cerebrovascular disorder, obstetric, antepartum, second trimester                                          | 674.03         | O99.412, I67.9  |
| Antepartum cerebrovascular disorder, second trimester                                                      | 674.03         | O99.412, I67.9  |
| Cerebrovascular disorder, with delivery, second trimester                                                  | 674.03         | O99.412, I67.9  |
| Cerebrovascular disorder, obstetric, second trimester                                                      | 674.03         | O99.412, I67.9  |
| Cerebrovascular disorder in pregnancy, childbirth, or the puerperium, second trimester                     | 674.03         | O99.412, I67.9  |
| Cerebrovascular disorder, antepartum, second trimester                                                     | 674.03         | O99.412, I67.9  |
| Cerebrovascular disorder, with delivery, with or without mention of antepartum condition, second trimester | 674.03         | O99.412, I67.9  |
| Cerebrovascular disorder, obstetric, delivered, second trimester                                           | 674.03         | O99.412, I67.9  |
| Antepartum cerebrovascular disorder in second trimester                                                    | 674.03         | O99.412, I67.9  |
| Cerebrovascular disorder affecting pregnancy in second trimester                                           | 674.03, 437.9  | O99.412, I67.9  |
| Cerebrovascular disorder affecting pregnancy, second trimester                                             | 674.03, 437.9  | O99.412, I67.9  |
| Maternal coronary artery disease, third trimester                                                          | 674.03         | O99.413, I25.10 |
| Maternal coronary artery disease complicating pregnancy, third trimester                                   | 648.63, 414.00 | O99.413, I25.10 |
| Maternal coronary artery disease complicating pregnancy in third trimester                                 | 648.63, 414.00 | O99.413, I25.10 |

|                                                                                                           |                |                 |
|-----------------------------------------------------------------------------------------------------------|----------------|-----------------|
| Maternal coronary artery disease affecting pregnancy in third trimester, antepartum                       | 648.63, 414.00 | O99.413, I25.10 |
| Maternal coronary artery disease affecting pregnancy, antepartum, third trimester                         | 648.63, 414.00 | O99.413, I25.10 |
| Antepartum cerebrovascular disorder, third trimester                                                      | 674.03         | O99.413, I67.9  |
| Cerebrovascular disorder in pregnancy, childbirth, or the puerperium, third trimester                     | 674.03         | O99.413, I67.9  |
| Cerebrovascular disorder, with delivery, third trimester                                                  | 674.03         | O99.413, I67.9  |
| Cerebrovascular disorder, with delivery, with or without mention of antepartum condition, third trimester | 674.03         | O99.413, I67.9  |
| Cerebrovascular disorder, antepartum, third trimester                                                     | 674.03         | O99.413, I67.9  |
| Cerebrovascular disorder, obstetric, antepartum, third trimester                                          | 674.03         | O99.413, I67.9  |
| Cerebrovascular disorder, obstetric, third trimester                                                      | 674.03         | O99.413, I67.9  |
| Cerebrovascular disorder, obstetric, delivered, third trimester                                           | 674.03         | O99.413, I67.9  |
| Cerebrovascular disorder occurring in pregnancy, childbirth, or the puerperium, third trimester           | 674.03         | O99.413, I67.9  |
| Antepartum cerebrovascular disorder in third trimester                                                    | 674.03         | O99.413, I67.9  |
| Cerebrovascular disorder affecting pregnancy in third trimester                                           | 674.03, 437.9  | O99.413, I67.9  |
| Cerebrovascular disorder affecting pregnancy, third trimester                                             | 674.03, 437.9  | O99.413, I67.9  |
| Maternal coronary artery disease complicating pregnancy                                                   | 648.60, 414.00 | O99.419, I25.10 |
| Maternal coronary artery disease, unspecified trimester                                                   | 648.60, 414.00 | O99.419, I25.10 |

|                                                                                                                           |                |                 |
|---------------------------------------------------------------------------------------------------------------------------|----------------|-----------------|
| Maternal coronary artery disease complicating pregnancy, unspecified trimester                                            | 648.63, 414.00 | O99.419, I25.10 |
| Maternal coronary artery disease affecting pregnancy, antepartum                                                          | 648.63, 414.00 | O99.419, I25.10 |
| Maternal coronary artery disease complicating pregnancy, antepartum                                                       | 648.63, 414.00 | O99.419, I25.10 |
| Maternal coronary artery disease affecting pregnancy, antepartum, unspecified trimester                                   | 648.63, 414.00 | O99.419, I25.10 |
| Idiopathic ischemic cerebrovascular accident occurring in prenatal-perinatal period                                       | 674            | O99.419, I63.9  |
| Idiopathic ischemic stroke occurring in prenatal-perinatal period                                                         | 674            | O99.419, I63.9  |
| Cerebrovascular disorder occurring in pregnancy, childbirth, or the puerperium, unspecified as to episode of care(674.00) | 674            | O99.419, I67.9  |
| Cerebrovascular disorder, antepartum(674.03)                                                                              | 674.03         | O99.419, I67.9  |
| Cerebrovascular disorder in pregnancy, childbirth, or the puerperium                                                      | 674.00, 437.9  | O99.419, I67.9  |
| Antepartum cerebrovascular disorder                                                                                       | 674.03, 437.9  | O99.419, I67.9  |
| Cerebrovascular disorder, obstetric, antepartum                                                                           | 674.03, 437.9  | O99.419, I67.9  |
| Cerebrovascular disorder, obstetric                                                                                       | 674.00, 437.9  | O99.419, I67.9  |
| Cerebrovascular disorder occurring in pregnancy, childbirth, or the puerperium                                            | 674.00, 437.9  | O99.419, I67.9  |
| Antepartum cerebrovascular disorder, unspecified trimester                                                                | 674.03, 437.9  | O99.419, I67.9  |
| Cerebrovascular disorder occurring in pregnancy, childbirth, or the puerperium, unspecified trimester                     | 674            | O99.419, I67.9  |
| Cerebrovascular disorder, obstetric, antepartum, unspecified trimester                                                    | 674.03, 437.9  | O99.419, I67.9  |
| Cerebrovascular disorder, with delivery, unspecified trimester                                                            | 674.01         | O99.419, I67.9  |

|                                                                                                                   |               |                |
|-------------------------------------------------------------------------------------------------------------------|---------------|----------------|
| Cerebrovascular disorder in pregnancy, childbirth, or the puerperium, unspecified trimester                       | 674           | O99.419, I67.9 |
| Cerebrovascular disorder, obstetric, unspecified trimester                                                        | 674           | O99.419, I67.9 |
| Cerebrovascular disorder, with delivery, with or without mention of antepartum condition, unspecified trimester   | 674.01        | O99.419, I67.9 |
| Cerebrovascular disorder, obstetric, delivered, unspecified trimester                                             | 674.01        | O99.419, I67.9 |
| Cerebrovascular disorder, antepartum, unspecified trimester                                                       | 674.03, 437.9 | O99.419, I67.9 |
| Cerebrovascular disorder occurring in pregnancy, childbirth, or the puerperium, unspecified as to episode of care | 674.00, 437.9 | O99.419, I67.9 |
| Cerebrovascular disorder, antepartum                                                                              | 674.03, 437.9 | O99.419, I67.9 |
| Cerebrovascular disorder affecting pregnancy                                                                      | 674.00, 437.9 | O99.419, I67.9 |
| Cerebrovascular disorder affecting pregnancy, unspecified trimester                                               | 674.03, 437.8 | O99.419, I67.9 |
| Cerebrovascular disorder affecting pregnancy, antepartum                                                          | 674.03, 437.8 | O99.419, I67.9 |
| Cerebrovascular disorder, with delivery, with or without mention of antepartum condition                          | 674.01        | O99.42, I67.9  |
| Cerebrovascular disorder, with delivery                                                                           | 674.01        | O99.42, I67.9  |
| Cerebrovascular disorder, obstetric, delivered                                                                    | 674.01        | O99.42, I67.9  |
| Puerp cerebvas dis-deliv                                                                                          | 674.01        | O99.42, I67.9  |
| Cerebrovascular disorder, with delivery, with mention of postpartum complication                                  | 674.02        | O99.43, I67.9  |
| Cerebrovascular disorder, postpartum(674.04)                                                                      | 674.04        | O99.43, I67.9  |
| Cerebrovascular disorder in the puerperium                                                                        | 674.04        | O99.43, I67.9  |
| Cerebrovascular disorder, with delivery, with postpartum complication                                             | 674.02        | O99.43, I67.9  |

|                                                                         |                                             |                                                |
|-------------------------------------------------------------------------|---------------------------------------------|------------------------------------------------|
| Puerperal cerebrovascular disorder with postnatal complication          | 674.04                                      | O99.43, I67.9                                  |
| Cerebrovascular disorder, obstetric, delivered/postpartum complication  | 674.02                                      | O99.43, I67.9                                  |
| Cerebrovascular disorder, obstetric, postpartum condition               | 674.04                                      | O99.43, I67.9                                  |
| Cerebrovascular disorder in puerperium                                  | 674.04                                      | O99.43, I67.9                                  |
| Cerebrovascular disorder, postpartum                                    | 674.04, 437.9                               | O99.43, I67.9                                  |
| Cerebrovascular disorders in the puerperium                             | 674.04                                      | O99.43, I67.9                                  |
| Puerperal cerebrovascular disorder with antenatal complication          | 674.04                                      | O99.43, I67.9                                  |
| Cerebrovascular disorder during puerperium                              | 674.04                                      | O99.43, I67.9                                  |
| Cerebrovasc dis-deliv w/ postpartum complication                        | 674.02                                      | O99.43, I67.9                                  |
| Cerebrovascular disorder, postpartum                                    | 674.04                                      | O99.43, I67.9                                  |
| Atherosclerosis, deafness, diabetes, epilepsy, and nephropathy syndrome | 759.89, 440.9, 593.9, 345.90, 389.9, 250.40 | Q87.89, I70.90, G40.909, H91.90, N28.9, E11.21 |
| Atherosclerosis-deafness-diabetes-epilepsy-nephropathy syndrome         | 759.89, 440.9, 593.9, 345.90, 389.9, 250.40 | Q87.89, I70.90, G40.909, H91.90, N28.9, E11.21 |
| Feigenbaum-Bergeron-Richardson syndrome                                 | 759.89, 440.9, 389.9, 345.90, 593.9, 250.40 | Q87.89, I70.90, H91.90, G40.909, N28.9, E11.21 |
| Poor arterial perfusion of leg                                          | 785.9                                       | R09.89                                         |
| Poor perfusion of leg                                                   | 785.9                                       | R09.89                                         |
| Poor arterial perfusion of lower extremity                              | 785.9                                       | R09.89                                         |
| Suspected cerebrovascular accident                                      | 785.9                                       | R09.89                                         |
| Unknown when suspected stroke patient was last well                     | 785.9                                       | R09.89                                         |
| Suspected stroke patient last known to be well 3-4.5 hours ago          | 785.9                                       | R09.89                                         |
| Suspected stroke patient last known to be well less than 2 hours ago    | 785.9                                       | R09.89                                         |
| Suspected stroke patient last known to be well 2-3 hours ago            | 785.9                                       | R09.89                                         |
| Suspected stroke patient last known to be well more than 2 hours ago    | 785.9                                       | R09.89                                         |

|                                                                                                      |                |                          |
|------------------------------------------------------------------------------------------------------|----------------|--------------------------|
| Suspected cerebrovascular accident (CVA)                                                             | 785.9          | R09.89                   |
| Unknown when suspected stroke patient was last well                                                  | 785.9          | R09.89                   |
| Suspected stroke patient last known to be well 2 to 3 hours ago                                      | 785.9          | R09.89                   |
| Suspected stroke patient last known to be well 3 to 4.5 hours ago                                    | 785.9          | R09.89                   |
| Alteration in skin integrity related to peripheral vascular disease                                  | 782.9, 443.9   | R23.8, I73.9             |
| Lateral ST segment elevation                                                                         | 794.31         | R94.31                   |
| Aortic dissection following procedure                                                                | 997.79, 441.00 | T81.718A, I71.00         |
| Aortic dissection following procedure, initial encounter                                             | 997.79, 441.00 | T81.718A, I71.00         |
| Aortic dissection following procedure, subsequent encounter                                          | V58.89         | T81.718D, I71.00         |
| Aortic dissection following procedure, sequela                                                       | 909.3          | T81.718S, I71.00         |
| Coronary stent restenosis due to progression of disease                                              | 414.00, V45.82 | T82.855A, I25.10         |
| Acute deep venous thrombosis of upper extremity after CABG procedure                                 | 453.82, 414.04 | T82.868A, I82.629, Z95.1 |
| Acute deep vein thrombosis of upper extremity following coronary artery bypass graft procedure       | 453.82, 414.04 | T82.868A, I82.629, Z95.1 |
| Acute deep vein thrombosis (DVT) of upper extremity following coronary artery bypass graft procedure | 453.82, 414.04 | T82.868A, I82.629, Z95.1 |
| Stenosis of renal artery in transplanted kidney                                                      | 440.1          | T86.19, I70.1            |
| Renal artery stenosis, transplant                                                                    | 440.1          | T86.19, I70.1            |
| Atherosclerosis of renal artery of transplanted kidney                                               | 996.81, 440.1  | T86.19, I70.1            |
| Renal artery atherosclerosis of kidney transplant                                                    | 996.81, 440.1  | T86.19, I70.1            |
| Non-flow-limiting renal artery stenosis of transplanted kidney                                       | 996.81, 440.1  | T86.19, I70.1            |

|                                                                        |                               |                |
|------------------------------------------------------------------------|-------------------------------|----------------|
| Renal artery stenosis, non-flow-limiting, of kidney transplant         | 996.81, 440.1                 | T86.19, I70.1  |
| Stenosis of one of two renal arteries of transplanted kidney           | 996.81, 440.1                 | T86.19, I70.1  |
| Renal artery stenosis in 1 of 2 vessels of kidney transplant           | 996.81, 440.1                 | T86.19, I70.1  |
| Renal artery stenosis in hilum of donor kidney at time of transplant   | 996.81, 440.1                 | T86.19, I70.1  |
| Stenosis of pancreatic artery of transplanted pancreas                 | 996.86, 447.1                 | T86.898, I77.1 |
| Pancreas artery stenosis of pancreas transplant                        | 996.86, 447.1                 | T86.898, I77.1 |
| Intragraft arterial stenosis of transplanted pancreas                  | 996.74, 996.86, E878.0, 447.1 | T86.898, I77.1 |
| Pre-operative cardiovascular examination, unstable angina              | 411.1, V72.81                 | Z01.810, I20.0 |
| Pre-operative cardiovascular examination, class IV angina              | 413.9, V72.81                 | Z01.810, I20.9 |
| Class IV angina, pre-operative cardiovascular examination              | 413.9, V72.81                 | Z01.810, I20.9 |
| Pre-operative cardiovascular examination, recent MI                    | V72.81, 410.92                | Z01.810, I21.9 |
| Pre-operative cardiovascular examination, recent myocardial infarction | V72.81, 410.92                | Z01.810, I21.9 |
| Pre-operative cardiovascular examination, myocardial ischemia          | 414.8, V72.81                 | Z01.810, I25.9 |
| Myocardial ischemia, pre-operative cardiovascular examination          | 414.8, V72.81                 | Z01.810, I25.9 |
| F/u of acute inferior myocardial infarction                            | V67.59, 412                   | Z09, I25.2     |
| Follow-up of acute inferior myocardial infarction                      | V67.59, 412                   | Z09, I25.2     |
| F/u of inferior myocardial infarction                                  | V67.59, 412                   | Z09, I25.2     |
| Follow-up of inferior myocardial infarction                            | V67.59, 412                   | Z09, I25.2     |
| Encounter for follow-up of acute inferior myocardial infarction        | V67.59, 412                   | Z09, I25.2     |
| F/u of acute lateral myocardial infarction                             | V67.59, 412                   | Z09, I25.2     |

|                                                                   |              |               |
|-------------------------------------------------------------------|--------------|---------------|
| Follow-up of acute lateral myocardial infarction                  | V67.59, 412  | Z09, I25.2    |
| F/u of lateral myocardial infarction                              | V67.59, 412  | Z09, I25.2    |
| Follow-up of lateral myocardial infarction                        | V67.59, 412  | Z09, I25.2    |
| F/u of acute posterior myocardial infarction                      | V67.59, 412  | Z09, I25.2    |
| Follow-up of acute posterior myocardial infarction                | V67.59, 412  | Z09, I25.2    |
| F/u of posterior myocardial infarction                            | V67.59, 412  | Z09, I25.2    |
| Follow-up of posterior myocardial infarction                      | V67.59, 412  | Z09, I25.2    |
| Encounter for follow-up of acute lateral myocardial infarction    | V67.59, 412  | Z09, I25.2    |
| Encounter for follow-up of acute posterior myocardial infarction  | V67.59, 412  | Z09, I25.2    |
| Follow-up of acute heart attack                                   | V67.59, 412  | Z09, I25.2    |
| Follow-up of heart attack                                         | V67.59, 412  | Z09, I25.2    |
| Follow-up of acute myocardial infarction                          | V67.59, 412  | Z09, I25.2    |
| Encounter for follow-up of acute myocardial infarction            | V67.59, 412  | Z09, I25.2    |
| F/u of anterior myocardial infarction                             | 410.12       | Z09, I25.2    |
| Follow-up of anterior myocardial infarction                       | 410.12       | Z09, I25.2    |
| Encounter for follow-up of myocardial infarction of anterior wall | 410.12       | Z09, I25.2    |
| Cerebrovascular disease consultation                              | V65.8, 437.9 | Z71.89, I67.9 |
| Cerebellar cerebrovascular accident without late effect           | V12.54       | Z86.73        |
| Cerebellar stroke without late effect                             | V12.54       | Z86.73        |
| Status post multiple cerebral infarctions                         | V12.54       | Z86.73        |
| Cerebellar cerebrovascular accident (CVA) without late effect     | V12.54       | Z86.73        |
| Peripheral vascular angioplasty status with implants and grafts   | V43.4        | Z95.820       |
| S/P peripheral artery angioplasty with stent placement            | V45.89       | Z95.820       |



|                                                                   |        |         |
|-------------------------------------------------------------------|--------|---------|
| Status post peripheral artery angioplasty with insertion of stent | V45.89 | Z95.820 |
| Peripheral vascular angioplasty status with implants and grafts   |        | Z95.820 |
| Blood vessel replaced by other means                              | V43.4  | Z95.828 |
| Personal history of extremity bypass graft                        | V45.89 | Z95.828 |
| Status post aortobifemoral bypass surgery                         | V45.89 | Z95.828 |
| S/P aortobifemoral bypass surgery                                 | V45.89 | Z95.828 |
| Status post femoral-popliteal bypass surgery                      | V45.89 | Z95.828 |
| S/P femoral-popliteal bypass surgery                              | V45.89 | Z95.828 |
| Status post ascending aortic replacement                          | V43.4  | Z95.828 |
| S/P ascending aortic replacement                                  | V43.4  | Z95.828 |
| Status post bypass graft of extremity                             | V45.89 | Z95.828 |
| Status post aortic bifurcation bypass graft                       | V45.89 | Z95.828 |
| S/P aortic bifurcation bypass graft                               | V45.89 | Z95.828 |
| Status post insertion of iliac artery stent                       | V45.89 | Z95.828 |
| S/P insertion of iliac artery stent                               | V45.89 | Z95.828 |
| History of blood vessel replacement                               | V43.4  | Z95.828 |
| Status post femoropopliteal bypass surgery                        | V45.89 | Z95.828 |
| S/P aorto-bifemoral bypass surgery                                | V45.89 | Z95.828 |
| History of aorta-iliac-femoral bypass                             | V15.1  | Z95.828 |
| History of aortoiliofemoral vascular bypass                       | V15.1  | Z95.828 |
| S/P bypass graft of extremity                                     | V45.89 | Z95.828 |
| Personal hx of extremity bypass graft                             | V45.89 | Z95.828 |
| History of extremity bypass graft                                 | V45.89 | Z95.828 |
| Hx of extremity bypass graft                                      | V45.89 | Z95.828 |
| S/P femoropopliteal bypass surgery                                | V45.89 | Z95.828 |
| History of aorto-femoral bypass                                   | V15.1  | Z95.828 |
| History of arterial bypass of lower limb                          | V45.89 | Z95.828 |
| History of endovascular stent graft for abdominal aortic aneurysm | V43.4  | Z95.828 |
| Hx of endovascular stent graft for abdominal aortic aneurysm      | V43.4  | Z95.828 |
| Presence of stent of bypass graft                                 | V45.89 | Z95.828 |

|                                                                                 |        |                 |
|---------------------------------------------------------------------------------|--------|-----------------|
| Presence of bypass graft stent                                                  | V45.89 | Z95.828         |
| H/O aorta-iliac-femoral bypass                                                  | V15.1  | Z95.828         |
| Hx of aorta-iliac-femoral bypass                                                | V15.1  | Z95.828         |
| H/O extremity bypass graft                                                      | V45.89 | Z95.828         |
| H/O aorto-femoral bypass                                                        | V15.1  | Z95.828         |
| Hx of aorto-femoral bypass                                                      | V15.1  | Z95.828         |
| H/O arterial bypass of lower limb                                               | V45.89 | Z95.828         |
| Hx of arterial bypass of lower limb                                             | V45.89 | Z95.828         |
| H/O endovascular stent graft for abdominal aortic aneurysm                      | V43.4  | Z95.828         |
| History of repair of aneurysm of abdominal aorta using endovascular stent graft | V43.4  | Z95.828         |
| Status post vascular bypass                                                     | V45.89 | Z95.828         |
| S/P vascular bypass                                                             | V45.89 | Z95.828         |
| History of intravascular stent placement                                        | V45.89 | Z95.828         |
| Presence of arterial stent                                                      | V49.89 | Z95.828         |
| Presence of stent in artery                                                     | V49.89 | Z95.828         |
| Surgically constructed arteriovenous graft                                      | V45.89 | Z95.828         |
| History of arterial bypass of lower extremity                                   | V45.89 | Z95.828         |
| Status post femorofemoral bypass surgery                                        | V45.89 | Z95.828         |
| Presence of other vascular implants and grafts                                  | V43.4  | Z95.828         |
| S/P femoral-femoral bypass surgery                                              | V45.89 | Z95.828         |
| History of endovascular stent graft for abdominal aortic aneurysm (AAA)         | V43.4  | Z95.828         |
| S/P repair of abdominal aortic aneurysm using bifurcation graft                 | V45.89 | Z95.828, Z86.79 |
| S/P AAA repair using bifurcation graft                                          | V45.89 | Z95.828, Z86.79 |
| Status post repair of abdominal aortic aneurysm using bifurcation graft         | V45.89 | Z95.828, Z86.79 |
| Status post repair of abdominal aortic aneurysm (AAA) using bifurcation graft   | V45.89 | Z95.828, Z86.79 |
| Status post angioplasty with stent                                              | V45.89 | Z95.9           |
| S/P angioplasty with stent                                                      | V45.89 | Z95.9           |

|                                                                       |        |       |
|-----------------------------------------------------------------------|--------|-------|
| Presence of cardiac and vascular implant and graft                    | V45.00 | Z95.9 |
| Central venous catheter in place, secondary permanent                 | V45.89 | Z95.9 |
| Status post arterial stent                                            | V45.89 | Z95.9 |
| S/P arterial stent                                                    | V45.89 | Z95.9 |
| Presence of cardiac and vascular implant and graft, unspecified       | V45.00 | Z95.9 |
| Presence of cardiac and vascular implant and graft, unspecified       |        | Z95.9 |
| Acute myocardial infarction of anterolateral wall                     | 410    |       |
| Acute myocardial infarction of inferolateral wall                     | 410.2  |       |
| Acute myocardial infarction of inferoposterior wall                   | 410.3  |       |
| Acute myocardial infarction, true posterior wall infarction           | 410.6  |       |
| Acute myocardial infarction, subendocardial infarction                | 410.7  |       |
| Angina pectoris                                                       | 413    |       |
| Coronary atherosclerosis                                              | 414    |       |
| Aneurysm and dissection of heart                                      | 414.1  |       |
| Occlusion and stenosis of basilar artery                              | 433    |       |
| Occlusion and stenosis of carotid artery                              | 433.1  |       |
| Occlusion and stenosis of vertebral artery                            | 433.2  |       |
| Occlusion and stenosis of multiple and bilateral precerebral arteries | 433.3  |       |
| Cerebral thrombosis                                                   | 434    |       |
| Transient cerebral ischemia                                           | 435    |       |
| Aortic aneurysm and dissection                                        | 441    |       |
| Dissection of aorta                                                   | 441    |       |
| Vascular insufficiency of intestine                                   | 557    |       |
| Late effects of cerebrovascular disease                               | 438    |       |
| Occlusion of cerebral arteries                                        | 434    |       |
| Persistent migraine aura with cerebral infarction                     | 346.6  |       |

|                                                                                                                                          |                |                |
|------------------------------------------------------------------------------------------------------------------------------------------|----------------|----------------|
| Acute myocardial infarction                                                                                                              | 410            |                |
| Atherosclerosis                                                                                                                          | 440            |                |
| Persistent migraine aura with cerebral infarction, without mention of intractable migraine with status migrainosus(346.62)               | 346.62         | G43.601, I63.9 |
| Persistent migraine aura with cerebral infarction, status migrainosus                                                                    | 346.62, 434.91 | G43.601, I63.9 |
| Migraine aura, persistent, with cerebral infarct, status migrainosus                                                                     | 346.62, 434.91 | G43.601, I63.9 |
| Migraine aura, persistent, with cerebral infarct, status over 72 hours                                                                   | 346.62, 434.91 | G43.601, I63.9 |
| Persistent migraine aura with cerebral infarction and status migrainosus, not intractable                                                | 346.62, 434.91 | G43.601, I63.9 |
| Persistent migraine aura with cerebral infarction, without mention of intractable migraine with status migrainosus                       | 346.62, 434.91 | G43.601, I63.9 |
| Persistent migraine aura with cerebral infarction and with status migrainosus                                                            | 346.62, 434.91 | G43.601, I63.9 |
| Prs ara wo ntr w inf/st                                                                                                                  | 346.62, 434.91 | G43.601, I63.9 |
| Persistent migraine aura with cerebral infarction, not intractable, with status migrainosus                                              | 346.62, 434.91 | G43.601, I63.9 |
| Perst migraine aura w cerebral infrc, not ntrct, w stat migr                                                                             | 346.62, 434.91 | G43.601, I63.9 |
| Persistent migraine aura with cerebral infarction, without mention of intractable migraine without mention of status migrainosus(346.60) | 346.6          | G43.609, I63.9 |
| Persistent migraine aura with cerebral infarction                                                                                        | 346.60, 434.91 | G43.609, I63.9 |
| Persistent migraine aura with stroke                                                                                                     | 346.60, 434.91 | G43.609, I63.9 |
| Migraine aura, persistent, with cerebral infarction                                                                                      | 346.60, 434.91 | G43.609, I63.9 |
| Persistent migraine aura with cerebral infarction and without status migrainosus, not intractable                                        | 346.60, 434.91 | G43.609, I63.9 |

|                                                                                                                                        |                |                |
|----------------------------------------------------------------------------------------------------------------------------------------|----------------|----------------|
| Persistent migraine aura with cerebral infarction, without mention of intractable migraine without mention of status migrainosus       | 346.60, 434.91 | G43.609, I63.9 |
| Persistent migraine aura with cerebral infarction without status migrainosus                                                           | 346.6          | G43.609, I63.9 |
| Prs ara w inf wo ntr/st                                                                                                                | 346.60, 434.91 | G43.609, I63.9 |
| Persistent migraine aura with cerebral infarction, not intractable, without status migrainosus                                         | 346.60, 434.91 | G43.609, I63.9 |
| Perst migraine aura w cereb infrc, not ntrct, w/o stat migr                                                                            | 346.60, 434.91 | G43.609, I63.9 |
| Persistent migraine aura with cerebral infarction, with intractable migraine, so stated, without mention of status migrainosus(346.61) | 346.61         | G43.611, I63.9 |
| Persistent migraine aura with cerebral infarction, with intractable migraine, so stated, with status migrainosus(346.63)               | 346.63         | G43.611, I63.9 |
| Persistent migraine aura, cerebral infarction, intractable, in status                                                                  | 346.63, 434.91 | G43.611, I63.9 |
| Migraine aura, persistent, with cerebral infarct, intractable, status                                                                  | 346.63, 434.91 | G43.611, I63.9 |
| Migraine aura, persistent, w/cerebral infarct, intract, status >72hrs                                                                  | 346.63, 434.91 | G43.611, I63.9 |
| Intractable persistent migraine aura with cerebral infarction and status migrainosus                                                   | 346.63, 434.91 | G43.611, I63.9 |
| Persistent migraine aura with cerebral infarction, with intractable migraine, so stated, with status migrainosus                       | 346.63, 434.91 | G43.611, I63.9 |
| Prst ara w inf w ntr/st                                                                                                                | 346.63, 434.91 | G43.611, I63.9 |
| Persistent migraine aura with cerebral infarction, intractable, with status migrainosus                                                | 346.63, 434.91 | G43.611, I63.9 |
| Perst migraine aura w cerebral infrc, ntrct, w stat migr                                                                               | 346.63, 434.91 | G43.611, I63.9 |

|                                                                                                                                |                |                |
|--------------------------------------------------------------------------------------------------------------------------------|----------------|----------------|
| Intractable persistent migraine aura with cerebral infarction                                                                  | 346.61, 434.91 | G43.619, I63.9 |
| Persistent migraine aura with cerebral infarct, intractable                                                                    | 346.61, 434.91 | G43.619, I63.9 |
| Migraine aura, persistent, with cerebral infarct, intractable                                                                  | 346.61, 434.91 | G43.619, I63.9 |
| Intractable persistent migraine aura with cerebral infarction and without status migrainosus                                   | 346.61, 434.91 | G43.619, I63.9 |
| Persistent migraine aura with cerebral infarction, with intractable migraine, so stated, without mention of status migrainosus | 346.61, 434.91 | G43.619, I63.9 |
| Persistent migraine aura with cerebral infarction, with intractable migraine, so stated                                        | 346.61, 434.91 | G43.619, I63.9 |
| Prs ara w/inf/ntr wo st                                                                                                        | 346.61, 434.91 | G43.619, I63.9 |
| Persistent migraine aura with cerebral infarction, intractable, without status migrainosus                                     | 346.61, 434.91 | G43.619, I63.9 |
| Perst migraine aura w cerebral infrc, ntrct, w/o stat migr                                                                     | 346.61, 434.91 | G43.619, I63.9 |
| Transient cerebral ischemic attacks and related syndromes                                                                      |                | G45            |
| Basilar artery syndrome                                                                                                        | 435            | G45.0          |
| Vertebral artery syndrome                                                                                                      | 435.1          | G45.0          |
| Vertebrobasilar artery syndrome                                                                                                | 435.3          | G45.0          |
| Basilar artery insufficiency                                                                                                   | 435            | G45.0          |
| Vertebral artery insufficiency                                                                                                 | 435.1          | G45.0          |
| Vertebro-basilar artery syndrome                                                                                               | 435.3          | G45.0          |
| Vertebrobasilar circulation transient ischemic attack                                                                          | 435.3          | G45.0          |
| Basilar artery ischemia                                                                                                        | 435            | G45.0          |
| Basilar insufficiency                                                                                                          | 435            | G45.0          |
| Vertebrobasilar ischemia                                                                                                       | 435.3          | G45.0          |
| Vertebral artery ischemia                                                                                                      | 435.1          | G45.0          |
| Vertebro basilar insufficiency                                                                                                 | 435.3          | G45.0          |

|                                             |       |       |
|---------------------------------------------|-------|-------|
| Vertebro basilar ischemia                   | 435.3 | G45.0 |
| Vertebrobasilar occlusive disease           | 433.2 | G45.0 |
| Vertebral-basilar artery occlusive syndrome | 433.2 | G45.0 |
| Vertebral basilar insufficiency             | 435.3 | G45.0 |
| Vertebrobasilar insufficiency               | 435.3 | G45.0 |
| Insufficiency, arterial, basilar artery     | 435   | G45.0 |
| Insufficiency, arterial, vertebral artery   | 435.1 | G45.0 |
